# Supplementary material for: Pyricularia’s Capability of Infecting Different Grasses in Two Regions of Mexico
Source: MDPI journal article supplement (doi:10.3390/jof9111055), 2023-10-27
Supplement: s1 [file s1]

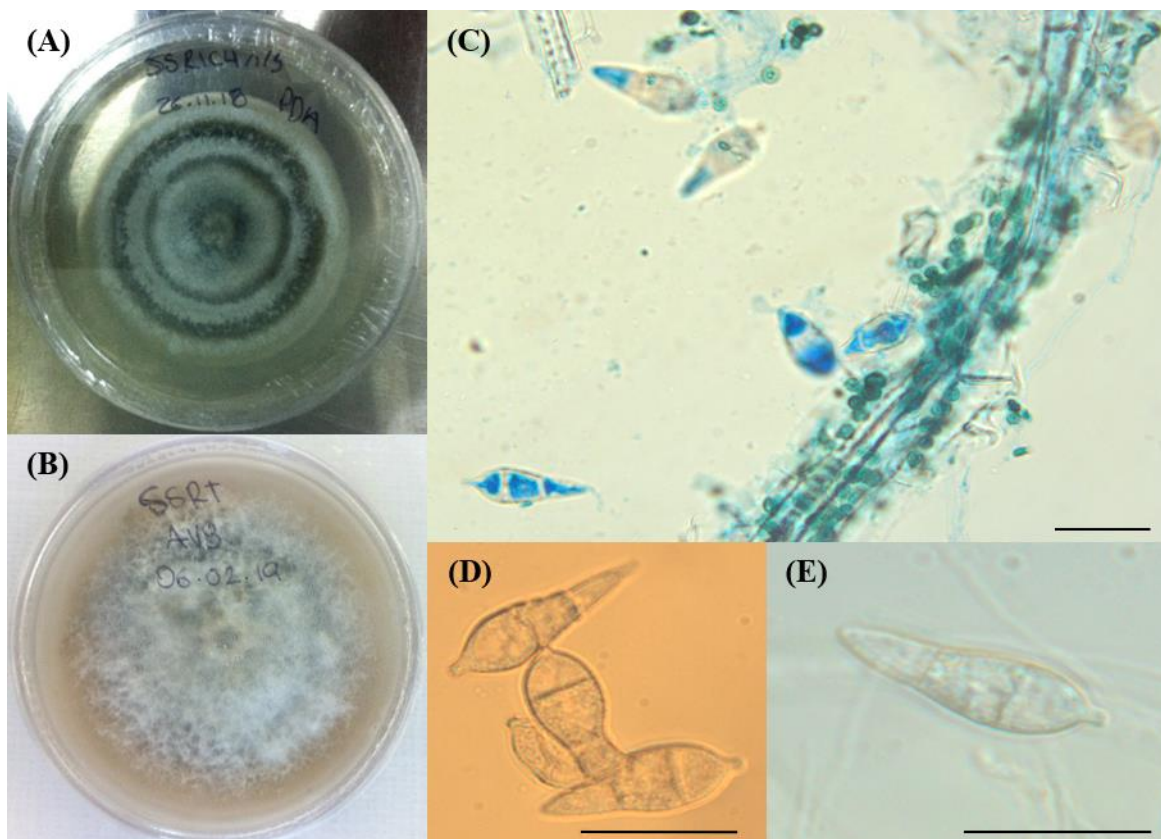

**Figure S1.** Representative morphologies of *Pyricularia* isolates by using the SR1 isolate. Growth on PDA agar showed a ringed sporulation pattern (A), and on V8 agar showed mycelia with black and white cottony masses (B). Different pictures (C, D and E) show the morphologic characteristics of the conidia associated with this fungus: pyriform, narrowed toward the tip, rounded at the base, colorless, smooth with three septa, and a size average of 28.1 x 8.5 μm. Bars below indicate 20 μm.
