# Supplementary material for: Pyricularia’s Capability of Infecting Different Grasses in Two Regions of Mexico
Source: MDPI journal article supplement (doi:10.3390/jof9111055), 2023-10-27
Supplement: s1 [file s1]

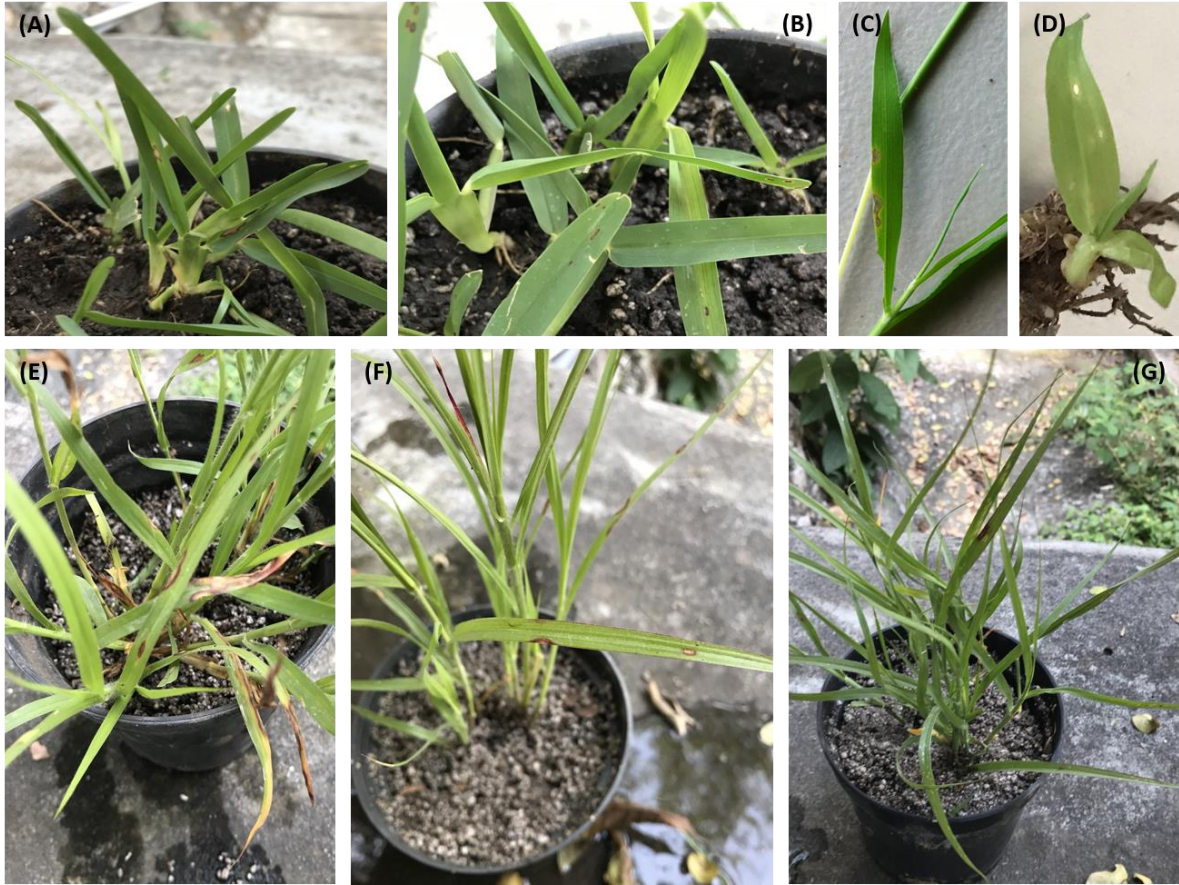

**Figure S3.** Representative images of the cross-infection assay by means of spore spraying in *S. secundatum*, *C. ciliaris* and *D. ciliaris* grasses. Lesions in leaves from *S. secundatum* grass produced by SY2 (A) and CR1 (B) isolates, respectively. Lesions in leaves from *D. ciliaris* grass produced by DY1 in mature (C) and young (D) leaves. Lesions in leaves from buffel grass (*C. ciliaris*) produced by CY1 (E), CR1 (F), and SR1 (G).
