# Supplementary material for: Pyricularia’s Capability of Infecting Different Grasses in Two Regions of Mexico
Source: MDPI journal article supplement (doi:10.3390/jof9111055), 2023-10-27
Supplement: s1 [file s1]

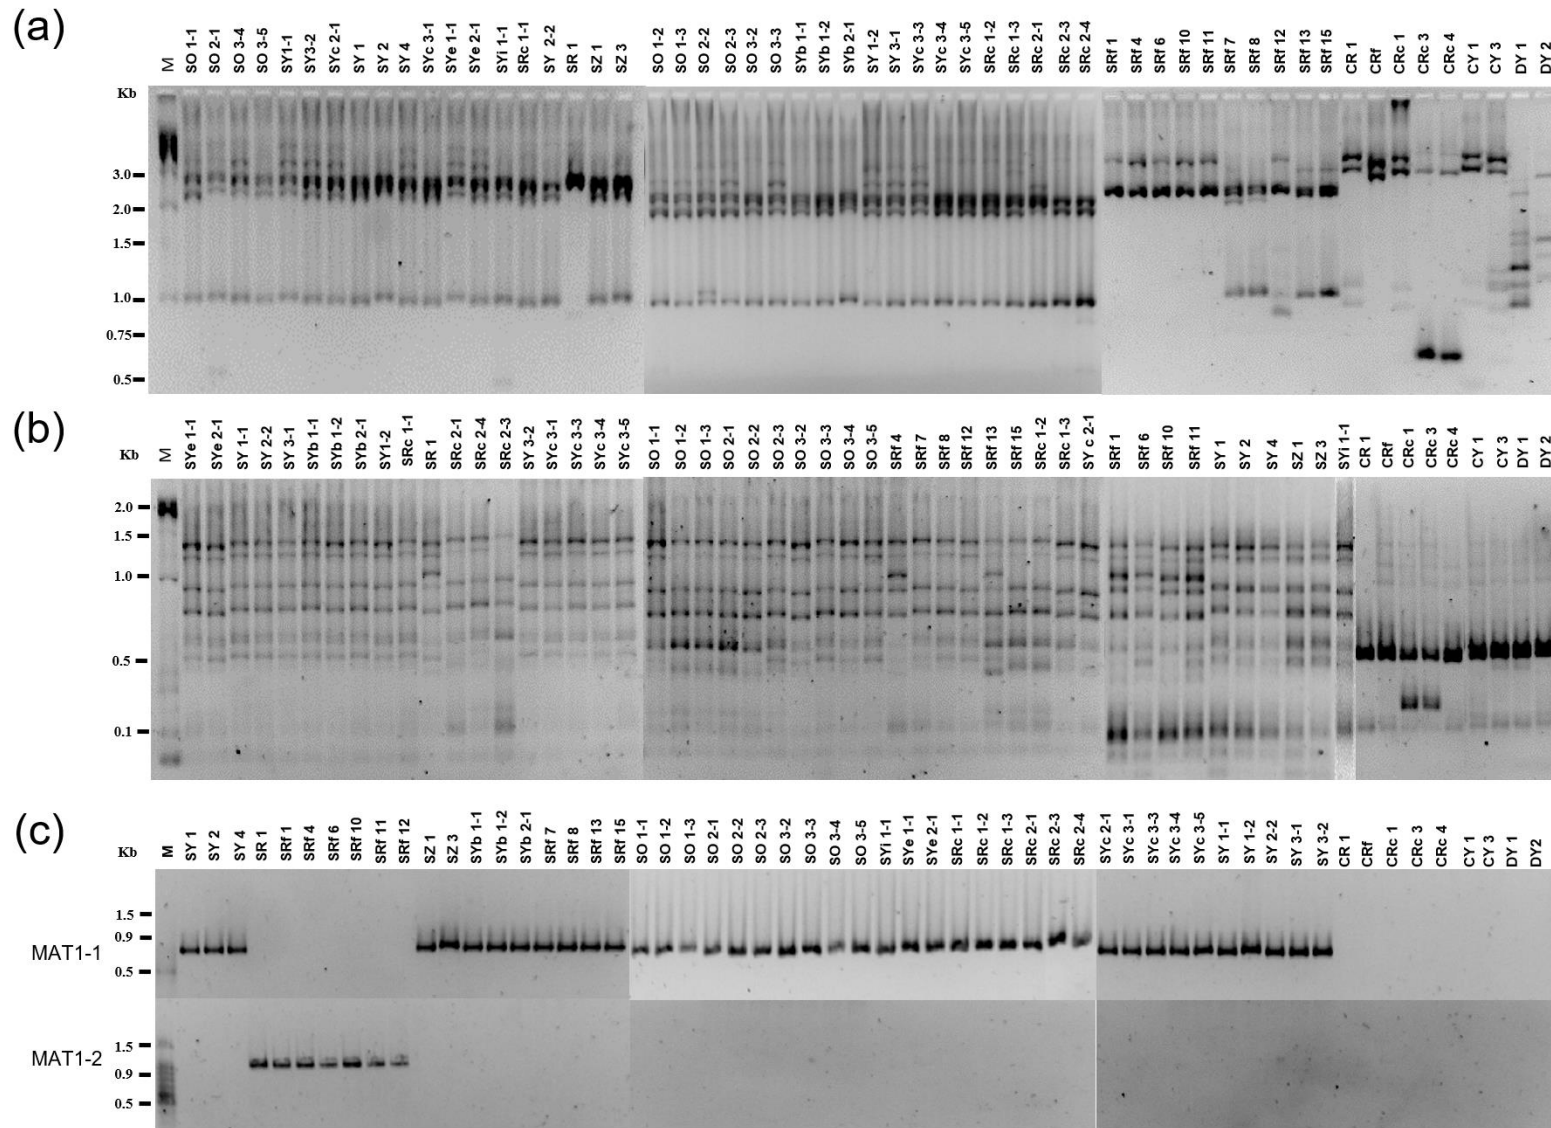

**Figure S2.** Genomic fingerprinting and mating type analysis. **A.** Pot2-TIR amplification profile showing band variability. M: Molecular marker ladder 1 kb (Promega, USA). **B.** ERIC-PCR amplification profiles showing band variability. M: Molecular marker ladder 1kb (Promega, USA). **C.** Mating type analysis for the *Pyricularia* isolates of this study. (Upper gel) *MAT1-1* (809bp), (Lower gel) *MAT1-2* (940pb). M: Molecular weight ladder (Promega100 bp), C: Negative control. All the gels were run at the same conditions.
