# Supplementary material for: Pyricularia’s Capability of Infecting Different Grasses in Two Regions of Mexico
Source: J Fungi (Basel). 2023 Oct 27;9(11):1055. doi: 10.3390/jof9111055 (PMC10672002; doi:10.3390/jof9111055)
Supplement: Supplementary file 1 [file jof-09-01055-s001.zip]

Archive with 4 entries (4 files):
- Fig S1.pdf
- Fig S2.pdf
- Fig S3.pdf
- Tables S1 y S2.xlsx
