# Supplementary material for: Pyricularia’s Capability of Infecting Different Grasses in Two Regions of Mexico
Source: J Fungi (Basel). 2023 Oct 27;9(11):1055. doi: 10.3390/jof9111055 (PMC10672002; doi:10.3390/jof9111055)
Supplement: Supplementary file 1 [file jof-09-01055-s001.zip › Tables S1 y S2.xlsx]

## Sheet: Table S1
Table S1. Dataset of the isolates of study and of the P. orizae accession retrieved from GenBank with longitude/latitude data
source	id	gene	sequence	superkingdom	kingdom	phylum	subphylum	class	subclass	infraclass	order	suborder	infraorder	superfamily	family	genus	species	country_location	latitude	longitude
NCBI	KJ173702	NA	AAACTTTCAACAACGGATCTCTTGTTTCTGGCATCGATGAAGAACGCAGCGAAATGCAATAAGTAATGTGAATTGCAGAATTCAGTGAATCATCAAATCTTTGAACGCACATTGCGCCCGCCGGTATTCCGGCGGGCATGCCTGTTCGAGCGTCATTTCAACCCTCAAGCCTAGCTTGTTGTTGGGGCCCGGGGCCCTCAAGTGTATCGGCGGTCTCGTCGGGACTCTGAGCGCAGTAACTCGCGGTAAAACGCGCCTCGCTTGGTCTTGTCTCCGGCGGGCTCCGGCTGCTAAACCCCACCTTCTCTCCCAGAGTAACATCGGATCAGTAGATACCCGTGACAA	Eukaryota	Fungi	Ascomycota	Pezizomycotina	Sordariomycetes	Sordariomycetidae	NA	Magnaporthales	NA	NA	NA	Pyriculariaceae	Pyricularia	Pyricularia oryzae	Brazil	-16.4	-56.5
NCBI	MW042178	NA	CTCCGTTGGTGAACCAGCGGAGGGATCATTACTGAGTTGAAAAACTCCAACCCCTGTGAACATAACCTCTGTCGTTGCTTCGGCGGGCACGCCCGCCGGAGGTTCAAAACTCTTATTTTTTCCAGTATCTCTGAGCCTGAAAGACAAATAATCAAAACTTTCAACAACGGATCTCTTGGTTCTGGCATCGATGAAGAACGCAGCGAAATGCGATAAGTAATGTGAATTGCAGAATTCAGTGAATCATCGAATCTTTGAACGCACATTGCGCCCGCCGGTATTCCGGCGGGCATGCCTGTTCGAGCGTCATTTCAACCCTCAAGCCTCGGCTTGGTGTTGGGGCGCCCGGGCCCTCCGCGGCCCGGGGCCCCCAAGTTCATCGGCGGGCTCGTCGGTACA…	Eukaryota	Fungi	Ascomycota	Pezizomycotina	Sordariomycetes	Sordariomycetidae	NA	Magnaporthales	NA	NA	NA	Pyriculariaceae	Pyricularia	Pyricularia oryzae	China:Guangdong	20.93	109.79
NCBI	MW042177	NA	CTCCGTTGGTGAACCAGCGGAGGGATCATTACTGAGTTGAAAAACTCCAACCCCTGTGAACATAACCTCTGTCGTTGCTTCGGCGGGCACGCCCGCCGGAGGTTCAAAACTCTTATTTTTTCCAGTATCTCTGAGCCTGAAAGACAAATAATCAAAACTTTCAACAACGGATCTCTTGGTTCTGGCATCGATGAAGAACGCAGCGAAATGCGATAAGTAATGTGAATTGCAGAATTCAGTGAATCATCGAATCTTTGAACGCACATTGCGCCCGCCGGTATTCCGGCGGGCATGCCTGTTCGAGCGTCATTTCAACCCTCAAGCCTCGGCTTGGTGTTGGGGCGCCCGGGCCCTCCGCGGCCCGGGGCCCCCAAGTTCATCGGCGGGCTCGTCGGTACA…	Eukaryota	Fungi	Ascomycota	Pezizomycotina	Sordariomycetes	Sordariomycetidae	NA	Magnaporthales	NA	NA	NA	Pyriculariaceae	Pyricularia	Pyricularia oryzae	China:Guangdong	20.93	109.79
NCBI	MW042176	NA	CTCCGTTGGTGAACCAGCGGAGGGATCATTACTGAGTTGAAAAACTCCAACCCCTGTGAACATAACCTCTGTCGTTGCTTCGGCGGGCACGCCCGCCGGAGGTTCAAAACTCTTATTTTTTCCAGTATCTCTGAGCCTGAAAGACAAATAATCAAAACTTTCAACAACGGATCTCTTGGTTCTGGCATCGATGAAGAACGCAGCGAAATGCGATAAGTAATGTGAATTGCAGAATTCAGTGAATCATCGAATCTTTGAACGCACATTGCGCCCGCCGGTATTCCGGCGGGCATGCCTGTTCGAGCGTCATTTCAACCCTCAAGCCTCGGCTTGGTGTTGGGGCGCCCGGGCCCTCCGCGGCCCGGGGCCCCCAAGTTCATCGGCGGGCTCGTCGGTACA…	Eukaryota	Fungi	Ascomycota	Pezizomycotina	Sordariomycetes	Sordariomycetidae	NA	Magnaporthales	NA	NA	NA	Pyriculariaceae	Pyricularia	Pyricularia oryzae	China:Guangdong	20.93	109.79
NCBI	MN202896	NA	AGGGATCATTACTGAGTTGAAAAACTCCAACCCCTGTGAACATAACCTCCTGTCGTTGCTTCGGCGGGCACGCCCGCCGGAGGTTCAAAACTCTTATTTTTTTCAGTATCTCTGAGCCTAAAAGACAAATAATCAAAACTTTCAACAACGGATCTCTTGGTTCTGGCATCGATGAAGAACGCAGCGAAATGCGATAAGTAATGTGAATTGCAGAATTCAGTGAATCATCGAATCTTTGAACGCACATTGCGCCCGCCGGTATTCCGGCGGGCATGCCTGTTCGAGCGTCATTTCAACCCTCAAGCCTCGGCTTGGTGTTGGGGCGCCCGGGCCCTCCGCGGCCCGGGGCCCCCAAGTTCATCGGCGGGCTCGTCGGTACACTGAGCGCAGTAAAACGCG…	Eukaryota	Fungi	Ascomycota	Pezizomycotina	Sordariomycetes	Sordariomycetidae	NA	Magnaporthales	NA	NA	NA	Pyriculariaceae	Pyricularia	Pyricularia oryzae	Ethiopia	9.2	41
NCBI	MN202895	NA	AGGGATCATTACTGAGTTGAAAAACTCCAACCCCTGTGAACATAACCTCCTGTCGTTGCTTCGGCGGGCACGCCCGCCGGAGGTTCAAAACTCTTATTTTTTTCAGTATCTCTGAGCCTAAAAGACAAATAATCAAAACTTTCAACAACGGATCTCTTGGTTCTGGCATCGATGAAGAACGCAGCGAAATGCGATAAGTAATGTGAATTGCAGAATTCAGTGAATCATCGAATCTTTGAACGCACATTGCGCCCGCCGGTATTCCGGCGGGCATGCCTGTTCGAGCGTCATTTCAACCCTCAAGCCTCGGCTTGGTGTTGGGGCGCCCGGGCCCTCCGCGGCCCGGGGCCCCCAAGTTCATCGGCGGGCTCGTCGGTTCACTGAGCGCAGTAAAACGCG…	Eukaryota	Fungi	Ascomycota	Pezizomycotina	Sordariomycetes	Sordariomycetidae	NA	Magnaporthales	NA	NA	NA	Pyriculariaceae	Pyricularia	Pyricularia oryzae	Ethiopia	9.2	41
NCBI	MN202894	NA	AGGGATCATTACTGAGTTGAAAAACTCCAACCCCTGTGAACATAACCTCCTGTCGTTGCTTCGGCGGGCACGCCCGCCGGAGGTTCAAAACTCTTATTTTTTTCAGTATCTCTGAGCCTAAAAGACAAATAATCAAAACTTTCAACAACGGATCTCTTGGTTCTGGCATCGATGAAGAACGCAGCGAAATGCGATAAGTAATGTGAATTGCAGAATTCAGTGAATCATCGAATCTTTGAACGCACATTGCGCCCGCCGGTATTCCGGCGGGCATGCCTGTTCGAGCGTCATTTCAACCCTCAAGCCTCGGCTTGGTGTTGGGGCGCCCGGGCCCTCCGCGGCCCGGGGCCCCCAAGTTCATCGGCGGGCTCGTCGGTTCACTGAGCGCAGTAAAACGCG…	Eukaryota	Fungi	Ascomycota	Pezizomycotina	Sordariomycetes	Sordariomycetidae	NA	Magnaporthales	NA	NA	NA	Pyriculariaceae	Pyricularia	Pyricularia oryzae	Ethiopia	9.2	41
NCBI	MN202893	NA	AGGGATCATTACTGAGTTGAAAAACTCCAACCCCTGTGAACATAACCTCCTGTCGTTGCTTCGGCGGGCACGCCCGCCGGAGGTTCAAAACTCTTATTTTTTTCAGTATCTCTGAGCCTAAAAGACAAATAATCAAAACTTTCAACAACGGATCTCTTGGTTCTGGCATCGATGAAGAACGCAGCGAAATGCGATAAGTAATGTGAATTGCAGAATTCAGTGAATCATCGAATCTTTGAACGCACATTGCGCCCGCCGGTATTCCGGCGGGCATGCCTGTTCGAGCGTCATTTCAACCCTCAAGCCTCGGCTTGGTGTTGGGGCGCCCGGGCCCTCCGCGGCCCGGGGCCCCCAAGTTCATCGGCGGGCTCGTCGGTACACTGAGCGCAGTAAAACGCG…	Eukaryota	Fungi	Ascomycota	Pezizomycotina	Sordariomycetes	Sordariomycetidae	NA	Magnaporthales	NA	NA	NA	Pyriculariaceae	Pyricularia	Pyricularia oryzae	Ethiopia	9.2	41
NCBI	MN202892	NA	AGGGATCATTACTGAGTTGAAAAACTCCAACCCCTGTGAACATAACCTCCTGTCGTTGCTTCGGCGGGCACGCCCGCCGGAGGTTCAAAACTCTTATTTTTTTCAGTATCTCTGAGCCTAAAAGACAAATAATCAAAACTTTCAACAACGGATCTCTTGGTTCTGGCATCGATGAAGAACGCAGCGAAATGCGATAAGTAATGTGAATTGCAGAATTCAGTGAATCATCGAATCTTTGAACGCACATTGCGCCCGCCGGTATTCCGGCGGGCATGCCTGTTCGAGCGTCATTTCAACCCTCAAGCCTCGGCTTGGTGTTGGGGCGCCCGGGCCCTCCGCGGCCCGGGGCCCCCAAGTTCATCGGCGGGCTCGTCGGTACACTGAGCGCAGTAAAACGCG…	Eukaryota	Fungi	Ascomycota	Pezizomycotina	Sordariomycetes	Sordariomycetidae	NA	Magnaporthales	NA	NA	NA	Pyriculariaceae	Pyricularia	Pyricularia oryzae	Ethiopia	9.2	41
NCBI	MN202891	NA	AGGGATCATTACTGAGTTGAAAAACTCCAACCCCTGTGAACATAACCTCCTGTCGTTGCTTCGGCGGGCACGCCCGCCGGAGGTTCAAAACTCTTATTTTTTTCAGTATCTCTGAGCCTAAAAGACAAATAATCAAAACTTTCAACAACGGATCTCTTGGTTCTGGCATCGATGAAGAACGCAGCGAAATGCGATAAGTAATGTGAATTGCAGAATTCAGTGAATCATCGAATCTTTGAACGCACATTGCGCCCGCCGGTATTCCGGCGGGCATGCCTGTTCGAGCGTCATTTCAACCCTCAAGCCTCGGCTTGGTGTTGGGGCGCCCGGGCCCTCCGCGGCCCGGGGCCCCCAAGTTCATCGGCGGGCTCGTCGGTACACTGAGCGCAGTAAAACGCG…	Eukaryota	Fungi	Ascomycota	Pezizomycotina	Sordariomycetes	Sordariomycetidae	NA	Magnaporthales	NA	NA	NA	Pyriculariaceae	Pyricularia	Pyricularia oryzae	Ethiopia	9.2	41
NCBI	MN202890	NA	AGGGATCATTACTGAGTTGAAAAACTCCAACCCCTGTGAACATAACCTCCTGTCGTTGCTTCGGCGGGCACGCCCGCCGGAGGTTCAAAACTCTTATTTTTTTCAGTATCTCTGAGCCTAAAAGACAAATAATCAAAACTTTCAACAACGGATCTCTTGGTTCTGGCATCGATGAAGAACGCAGCGAAATGCGATAAGTAATGTGAATTGCAGAATTCAGTGAATCATCGAATCTTTGAACGCACATTGCGCCCGCCGGTATTCCGGCGGGCATGCCTGTTCGAGCGTCATTTCAACCCTCAAGCCTCGGCTTGGTGTTGGGGCGCCCGGGCCCTCCGCGGCCCGGGGCCCCCAAGTTCATCGGCGGGCTCGTCGGTACACTGAGCGCAGTAAAACGCG…	Eukaryota	Fungi	Ascomycota	Pezizomycotina	Sordariomycetes	Sordariomycetidae	NA	Magnaporthales	NA	NA	NA	Pyriculariaceae	Pyricularia	Pyricularia oryzae	Ethiopia	9.2	41
NCBI	MN202889	NA	AGGGATCATTACTGAGTTGAAAAACTCCAACCCCTGTGAACATAACCTCCTGTCGTTGCTTCGGCGGGCACGCCCGCCGGAGGTTCAAAACTCTTATTTTTTTCAGTATCTCTGAGCCTAAAAGACAAATAATCAAAACTTTCAACAACGGATCTCTTGGTTCTGGCATCGATGAAGAACGCAGCGAAATGCGATAAGTAATGTGAATTGCAGAATTCAGTGAATCATCGAATCTTTGAACGCACATTGCGCCCGCCGGTATTCCGGCGGGCATGCCTGTTCGAGCGTCATTTCAACCCTCAAGCCTCGGCTTGGTGTTGGGGCGCCCGGGCCCTCCGCGGCCCGGGGCCCCCAAGTTCATCGGCGGGCTCGTCGGTACACTGAGCGCAGTAAAACGCG…	Eukaryota	Fungi	Ascomycota	Pezizomycotina	Sordariomycetes	Sordariomycetidae	NA	Magnaporthales	NA	NA	NA	Pyriculariaceae	Pyricularia	Pyricularia oryzae	Ethiopia	9.2	41
NCBI	MN202888	NA	AGGGATCATTACTGAGTTGAAAAACTCCAACCCCTGTGAACATACCCTCCTGTCGTTGCTTCGGCGGGCACGCCCGCCGGAGGTTCAAAACTCTTATTTTTTTCAGTATCTCTGAGCCTAAAAGACAAATAATCAAAACTTTCAACAACGGATCTCTTGGTTCTGGCATCGATGAAGAACGCAGCGAAATGCGATAAGTAATGTGAATTGCAGAATTCAGTGAATCATCGAATCTTTGAACGCACATTGCGCCCGCCGGTATTCCGGCGGGCATGCCTGTTCGAGCGTCATTTCAACCCTCAAGCCTCGGCTTGGTGTTGGGGCGCCCGGGCCCTCCGCGGCCCGGGGCCCCCAAGTTCATCGGCGGGCTCGTCGGTACACTGAGCGCAGTAAAACGCG…	Eukaryota	Fungi	Ascomycota	Pezizomycotina	Sordariomycetes	Sordariomycetidae	NA	Magnaporthales	NA	NA	NA	Pyriculariaceae	Pyricularia	Pyricularia oryzae	Ethiopia	9.2	41
NCBI	MN202887	NA	AGGGATCATTACTGAGTTGAAAAACTCCAACCCCTGTGAACATAACCTCCTGTCGTTGCTTCGGCGGGCACGCCCGCCGGAGGTTCAAAACTCTTATTTTTTTCAGTATCTCTGAGCCTAAAAGACAAATAATCAAAACTTTCAACAACGGATCTCTTGGTTCTGGCATCGATGAAGAACGCAGCGAAATGCGATAAGTAATGTGAATTGCAGAATTCAGTGAATCATCGAATCTTTGAACGCACATTGCGCCCGCCGGTATTCCGGCGGGCATGCCTGTTCGAGCGTCATTTCAACCCTCAAGCCTCGGCTTGGTGTTGGGGCGCCCGGGCCCTCCGCGGCCCGGGGCCCCCAAGTTCATCGGCGGGCTCGTCGGTACACTGAGCGCAGTAAAACGCG…	Eukaryota	Fungi	Ascomycota	Pezizomycotina	Sordariomycetes	Sordariomycetidae	NA	Magnaporthales	NA	NA	NA	Pyriculariaceae	Pyricularia	Pyricularia oryzae	Ethiopia	9.2	41
NCBI	MN202886	NA	AGGGATCATTACTGAGTTGAAAAACTCCAACCCCTGTGAACATAACCTCCTGTCGTTGCTTCGGCGGGCACGCCCGCCGGAGGTTCAAAACTCTTATTTTTTTCAGTATCTCTGAGCCTAAAAGACAAATAATCAAAACTTTCAACAACGGATCTCTTGGTTCTGGCATCGATGAAGAACGCAGCGAAATGCGATAAGTAATGTGAATTGCAGAATTCAGTGAATCATCGAATCTTTGAACGCACATTGCGCCCGCCGGTATTCCGGCGGGCATGCCTGTTCGAGCGTCATTTCAACCCTCAAGCCTCGGCTTGGTGTTGGGGCGCCCGGGCCCTCCGCGGCCCGGGGCCCCCAAGTTCATCGGCGGGCTCGTCGGTACACTGAGCGCAGTAAAACGCG…	Eukaryota	Fungi	Ascomycota	Pezizomycotina	Sordariomycetes	Sordariomycetidae	NA	Magnaporthales	NA	NA	NA	Pyriculariaceae	Pyricularia	Pyricularia oryzae	Ethiopia	9.2	41
NCBI	MN202885	NA	AGGGATCATTACTGAGTTGAAAAACTCCAACCCCTGTGAACATAACCTCCTGTCGTTGCTTCGGCGGGCACGCCCGCCGGAGGTTCAAAACTCTTATTTTTTTCAGTATCTCTGAGCCTAAAAGACAAATAATCAAAACTTTCAACAACGGATCTCTTGGTTCTGGCATCGATGAAGAACGCAGCGAAATGCGATAAGTAATGTGAATTGCAGAATTCAGTGAATCATCGAATCTTTGAACGCACATTGCGCCCGCCGGTATTCCGGCGGGCATGCCTGTTCGAGCGTCATTTCAACCCTCAAGCCTCGGCTTGGTGTTGGGGCGCCCGGGCCCTCCGCGGCCCGGGGCCCCCAAGTTCATCGGCGGGCTCGTCGGTACACTGAGCGCAGTAAAACGCG…	Eukaryota	Fungi	Ascomycota	Pezizomycotina	Sordariomycetes	Sordariomycetidae	NA	Magnaporthales	NA	NA	NA	Pyriculariaceae	Pyricularia	Pyricularia oryzae	Ethiopia	9.2	41
NCBI	MN202884	NA	AGGGATCATTACTGAGTTGAAAAACTCCAACCCCTGTGAACATAACCTCCTGTCGTTGCTTCGGCGGGCACGCCCGCCGGAGGTTCAAAACTCTTATTTTTTTCAGTATCTCTGAGCCTAAAAGACAAATAATCAAAACTTTCAACAACGGATCTCTTGGTTCTGGCATCGATGAAGAACGCAGCGAAATGCGATAAGTAATGTGAATTGCAGAATTCAGTGAATCATCGAATCTTTGAACGCACATTGCGCCCGCCGGTATTCCGGCGGGCATGCCTGTTCGAGCGTCATTTCAACCCTCAAGCCTCGGCTTGGTGTTGGGGCGCCCGGGCCCTCCGCGGCCCGGGGCCCCCAAGTTCATCGGCGGGCTCGTCGGTACACTGAGCGCAGTAAAACGCG…	Eukaryota	Fungi	Ascomycota	Pezizomycotina	Sordariomycetes	Sordariomycetidae	NA	Magnaporthales	NA	NA	NA	Pyriculariaceae	Pyricularia	Pyricularia oryzae	Ethiopia	9.2	41
NCBI	MN202883	NA	AGGGATCATTACTGAGTTGAAAAACTCCAACCCCTGTGAACATAACCTCCTGTCGTTGCTTCGGCGGGCACGCCCGCCGGAGGTTCAAAACTCTTATTTTTTTCAGTATCTCTGAGCCTAAAAGACAAATAATCAAAACTTTCAACAACGGATCTCTTGGTTCTGGCATCGATGAAGAACGCAGCGAAATGCGATAAGTAATGTGAATTGCAGAATTCAGTGAATCATCGAATCTTTGAACGCACATTGCGCCCGCCGGTATTCCGGCGGGCATGCCTGTTCGAGCGTCATTTCAACCCTCAAGCCTCGGCTTGGTGTTGGGGCGCCCGGGCCCTCCGCGGCCCGGGGCCCCCAAGTTCATCGGCGGGCTCGTCGGTACACTGAGCGCAGTAAAACGCG…	Eukaryota	Fungi	Ascomycota	Pezizomycotina	Sordariomycetes	Sordariomycetidae	NA	Magnaporthales	NA	NA	NA	Pyriculariaceae	Pyricularia	Pyricularia oryzae	Ethiopia	9.2	41
NCBI	MN202882	NA	AGGGATCATTACTGAGTTGAAAAACTCCAACCCCTGTGAACATAACCTCCTGTCGTTGCTTCGGCGGGCACGCCCGCCGGAGGTTCAAAACTCTTATTTTTTTCAGTATCTCTGAGCCTAAAAGACAAATAATCAAAACTTTCAACAACGGATCTCTTGGTTCTGGCATCGATGAAGAACGCAGCGAAATGCGATAAGTAATGTGAATTGCAGAATTCAGTGAATCATCGAATCTTTGAACGCACATTGCGCCCGCCGGTATTCCGGCGGGCATGCCTGTTCGAGCGTCATTTCAACCCTCAAGCCTCGGCTTGGTGTTGGGGCGCCCGGGCCCTCCGCGGCCCGGGGCCCCCAAGTTCATCGGCGGGCTCGTCGGTACACTGAGCGCAGTAAAACGCG…	Eukaryota	Fungi	Ascomycota	Pezizomycotina	Sordariomycetes	Sordariomycetidae	NA	Magnaporthales	NA	NA	NA	Pyriculariaceae	Pyricularia	Pyricularia oryzae	Ethiopia	9.2	41
NCBI	MN202881	NA	AGGGATCATTACTGAGTTGAAAAACTCCAACCCCTGTGAACATAACCTCCTGTCGTTGCTTCGGCGGGCACGCCCGCCGGAGGTTCAAAACTCTTATTTTTTTCAGTATCTCTGAGCCTAAAAGACAAATAATCAAAACTTTCAACAACGGATCTCTTGGTTCTGGCATCGATGAAGAACGCAGCGAAATGCGATAAGTAATGTGAATTGCAGAATTCAGTGAATCATCGAATCTTTGAACGCACATTGCGCCCGCCGGTATTCCGGCGGGCATGCCTGTTCGAGCGTCATTTCAACCCTCAAGCCTCGGCTTGGTGTTGGGGCGCCCGGGCCCTCCGCGGCCCGGGGCCCCCAAGTTCATCGGCGGGCTCGTCGGTACACTGAGCGCAGTAAAACGCG…	Eukaryota	Fungi	Ascomycota	Pezizomycotina	Sordariomycetes	Sordariomycetidae	NA	Magnaporthales	NA	NA	NA	Pyriculariaceae	Pyricularia	Pyricularia oryzae	Ethiopia	9.2	41
NCBI	MN202880	NA	AGGGATCATTACTGAGTTGAAAAACTCCAACCCCTGTGAACATAACCTCCTGTCGTTGCTTCGGCGGGCACGCCCGCCGGAGGTTCAAAACTCTTATTTTTTTCAGTATCTCTGAGCCTAAAAGACAAATAATCAAAACTTTCAACAACGGATCTCTTGGTTCTGGCATCGATGAAGAACGCAGCGAAATGCGATAAGTAATGTGAATTGCAGAATTCAGTGAATCATCGAATCTTTGAACGCACATTGCGCCCGCCGGTATTCCGGCGGGCATGCCTGTTCGAGCGTCATTTCAACCCTCAAGCCTCGGCTTGGTGTTGGGGCGCCCGGGCCCTCCGCGGCCCGGGGCCCCCAAGTTCATCGGCGGGCTCGTCGGTACACTGAGCGCAGTAAAACGCG…	Eukaryota	Fungi	Ascomycota	Pezizomycotina	Sordariomycetes	Sordariomycetidae	NA	Magnaporthales	NA	NA	NA	Pyriculariaceae	Pyricularia	Pyricularia oryzae	Ethiopia	9.2	41
NCBI	MN202879	NA	AGGGATCATTACTGAGTTGAAAAACTCCAACCCCTGTGAACATAACCTCCTGTCGTTGCTTCGGCGGGCACGCCCGCCGGAGGTTCAAAACTCTTATTTTTTTCAGTATCTCTGAGCCTAAAAGACAAATAATCAAAACTTTCAACAACGGATCTCTTGGTTCTGGCATCGATGAAGAACGCAGCGAAATGCGATAAGTAATGTGAATTGCAGAATTCAGTGAATCATCGAATCTTTGAACGCACATTGCGCCCGCCGGTATTCCGGCGGGCATGCCTGTTCGAGCGTCATTTCAACCCTCAAGCCTCGGCTTGGTGTTGGGGCGCCCGGGCCCTCCGCGGCCCGGGGCCCCCAAGTTCATCGGCGGGCTCGTCGGTTCACTGAGCGCAGTAAAACGCG…	Eukaryota	Fungi	Ascomycota	Pezizomycotina	Sordariomycetes	Sordariomycetidae	NA	Magnaporthales	NA	NA	NA	Pyriculariaceae	Pyricularia	Pyricularia oryzae	Ethiopia	9.2	41
NCBI	MN202878	NA	AGGGATCATTACTGAGTTGAAAAACTCCAACCCCTGTGAACATAACCTCCTGTCGTTGCTTCGGCGGGCACGCCGCCGGAGGTTCAAAACTCTTATTTTTTTCAGTATCTCTGAGCCTAAAAGACAAATAATCAAAACTTTCAACAACGGATCTCTTGGTTCTGGCATCGATGAAGAACGCAGCGAAATGCGATAAGTAATGTGAATTGCAGAATTCAGTGAATCATCGAATCTTTGAACGCACATTGCGCCCGCCGGTATTCCGGCGGGCATGCCTGTTCGAGCGTCATTTCAACCCTCAAGCCTCGGCTTGGTGTTGGGGCGCCCGGGCCCTCCGCGGCCCGGGGCCCCCAAGTTCATCGGCGGGCTCGTCGGTACACTGAGCGCAGTAAAACGCGG…	Eukaryota	Fungi	Ascomycota	Pezizomycotina	Sordariomycetes	Sordariomycetidae	NA	Magnaporthales	NA	NA	NA	Pyriculariaceae	Pyricularia	Pyricularia oryzae	Ethiopia	9.2	41
NCBI	MN202877	NA	AGGGATCATTACTGAGTTGAAAAACTCCAACCCCTGTGAACATAACCTCCTGTCGTTGCTTCGGCGGGCACGCCCGCCGGAGGTTCAAAACTCTTATTTTTTTCAGTATCTCTGAGCCTAAAAGACAAATAATCAAAACTTTCAACAACGGATCTCTTGGTTCTGGCATCGATGAAGAACGCAGCGAAATGCGATAAGTAATGTGAATTGCAGAATTCAGTGAATCATCGAATCTTTGAACGCACATTGCGCCCGCCGGTATTCCGGCGGGCATGCCTGTTCGAGCGTCATTTCAACCCTCAAGCCTCGGCTTGGTGTTGGGGCGCCCGGGCCCTCCGCGGCCCGGGGCCCCCAAGTTCATCGGCGGGCTCGTCGGTACACTGAGCGCAGTAAAACGCG…	Eukaryota	Fungi	Ascomycota	Pezizomycotina	Sordariomycetes	Sordariomycetidae	NA	Magnaporthales	NA	NA	NA	Pyriculariaceae	Pyricularia	Pyricularia oryzae	Ethiopia	9.2	41
NCBI	MN202876	NA	AGGGATCATTACTGAGTTGAAAAACTCCAACCCCTGTGAACATAACCTCCTGTCGTTGCTTCGGCGGGCACGCCCGCCGGAGGTTCAAAACTCTTATTTTTTTCAGTATCTCTGAGCCTAAAAGACAAATAATCAAAACTTTCAACAACGGATCTCTTGGTTTGGCATCGATGAAGAACGCAGCGAAATGCGATAAGTAATGTGAATTGCAGAATTCAGTGAATCATCGAATCTTTGAACGCACATTGCGCCCGCCGGTATTCCGGCGGGCATGCCTGTTCGAGCGTCATTTCAACCCTCAAGCCTCGGCTTGGTGTTGGGGCGCCCGGGCCCTCCGCGGCCCGGGGCCCCCAAGTTCATCGGCGGGCTCGTCGGTTCACTGAGCGCAGTAAAACGCGG…	Eukaryota	Fungi	Ascomycota	Pezizomycotina	Sordariomycetes	Sordariomycetidae	NA	Magnaporthales	NA	NA	NA	Pyriculariaceae	Pyricularia	Pyricularia oryzae	Ethiopia	9.2	41
NCBI	MN202875	NA	AGGGATCATTACTGAGTTGAAAAACTCCAACCCCTGTGAACATAACCTCCTGCTTCGGCGGGCACGCCCGCCGGAGGTTCAAAACTCTTATTTTTTTCAGTATCTCTGAGCCTAAAAGACAAATAATCAAAACTTTCAACAACGGATCTCTTGGTTCTGGCATCGATGAAGAACGCAGCGAAATGCGATAAGTAATGTGAATTGCAGAATTCAGTGAATCATCGAATCTTTGAACGCACATTGCGCCCGCCGGTATTCCGGCGGGCATGCCTGTTCGAGCGTCATTTCAACCCTCAAGCCTCGGCTTGGTGTTGGGGCGCCCGGGCCCTCCGCGGCCCGGGGCCCCCAAGTTCATCGGCGGGCTCGTCGGTACACTGAGCGCAGTAAAACGCGGTAAAA…	Eukaryota	Fungi	Ascomycota	Pezizomycotina	Sordariomycetes	Sordariomycetidae	NA	Magnaporthales	NA	NA	NA	Pyriculariaceae	Pyricularia	Pyricularia oryzae	Ethiopia	9.2	41
NCBI	MN202874	NA	AGGGATCATTACTGAGTTGAAAAACTCCAACCCCTGTGAACATAACCTCCTGTCGTTGCTTCGGCGGGCACGCCCGCCGGAGGTTCAAAACTCTTATTTTTTTCAGTATCTCTGAGCCTAAAAGACAAATAATCAAAACTTTCAACAACGGATCTCTTGGTTCTGGCATCGATGAAGAACGCAGCGAAATGCGATAAGTAATGTGAATTGCAGAATTCAGTGAATCATCGAATCTTTGAACGCACATTGCGCCCGCCGGTATTCCGGCGGGCATGCCTGTTCGAGCGTCATTTCAACCCTCAAGCCTCGGCTTGGTGTTGGGGCGCCCGGGCCCTCCGCGGCCCGGGGCCCCCAAGTTCATCGGCGGGCTCGTCGGTACACTGAGCGCAGTAAAACGCG…	Eukaryota	Fungi	Ascomycota	Pezizomycotina	Sordariomycetes	Sordariomycetidae	NA	Magnaporthales	NA	NA	NA	Pyriculariaceae	Pyricularia	Pyricularia oryzae	Ethiopia	9.2	41
NCBI	MN202873	NA	AGGGATCATTACTGAGTTGAAAAACTCCAACCCCTGTGAACATAACCTCCTGTCGTTGCTTCGGCGGGCACGCCCGCCGGAGGTTCAAAACTCTTATTTTTTTCAGTATCTCTGAGCCTAAAAGACAAATAATCAAAACTTTCAACAACGGATCTCTTGGTTCTGGCATCGATGAAGAACGCAGCGAAATGCGATAAGTAATGTGAATTGCAGAATTCAGTGAATCATCGAATCTTTGAACGCACATTGCGCCCGCCGGTATTCCGGCGGGCATGCCTGTTCGAGCGTCATTTCAACCCTCAAGCCTCGGCTTGGTGTTGGGGCGCCCGGGCCCTCCGCGGCCCGGGGCCCCCAAGTTCATCGGCGGGCTCGTCGGTACACTGAGCGCAGTAAAACGCG…	Eukaryota	Fungi	Ascomycota	Pezizomycotina	Sordariomycetes	Sordariomycetidae	NA	Magnaporthales	NA	NA	NA	Pyriculariaceae	Pyricularia	Pyricularia oryzae	Ethiopia	9.2	41
NCBI	MN202872	NA	AGGGATCATTACTGAGTTGAAAAACTCCAACCCCTGTGAACATAACCTCCTGTCGTTGCTTCGGCGGGCACGCCCGCCGGAGGTTCAAAACTCTTATTTTTTTCAGTATCTCTGAGCCTAAAAGACAAATAATCAAAACTTTCAACAACGGATCTCTTGGTTCTGGCATCGATGAAGAACGCAGCGAAATGCGATAAGTAATGTGAATTGCAGAATTCAGTGAATCATCGAATCTTTGAACGCACATTGCGCCCGCCGGTATTCCGGCGGGCATGCCTGTTCGAGCGTCATTTCAACCCTCAAGCCTCGGCTTGGTGTTGGGGCGCCCGGGCCCTCCGCGGCCCGGGGCCCCCAAGTTCATCGGCGGGCTCGTCGGTACACTGAGCGCAGTAAAACGCG…	Eukaryota	Fungi	Ascomycota	Pezizomycotina	Sordariomycetes	Sordariomycetidae	NA	Magnaporthales	NA	NA	NA	Pyriculariaceae	Pyricularia	Pyricularia oryzae	Ethiopia	9.2	41
NCBI	MN202871	NA	AGGGATCATTACTGAGTTGAAAAACTCCAACCCCTGTGAACATAACCTCCTGTCGTTGCTTCGGCGGGCACGCCCGCCGGAGGTTCAAAACTCTTATTTTTTTCAGTATCTCTGAGCCTAAAAGACAAATAATCAAAACTTTCAACAACGGATCTCTTGGTTCTGGCATCGATGAAGAACGCAGCGAAATGCGATAAGTAATGTGAATTGCAGAATTCAGTGAATCATCGAATCTTTGAACGCACATTGCGCCCGCCGGTATTCCGGCGGGCATGCCTGTTCGAGCGTCATTTCAACCCTCAAGCCTCGGCTTGGTGTTGGGGCGCCCGGGCCCTCCGCGGCCCGGGGCCCCCAAGTTCATCGGCGGGCTCGTCGGTACACTGAGCGCAGTAAAACGCG…	Eukaryota	Fungi	Ascomycota	Pezizomycotina	Sordariomycetes	Sordariomycetidae	NA	Magnaporthales	NA	NA	NA	Pyriculariaceae	Pyricularia	Pyricularia oryzae	Ethiopia	9.2	41
NCBI	MN202870	NA	AGGGATCATTACTGAGTTGAAAAACTCCAACCCCTGTGAACATAACCTCCTGTCGTTGCTTCGGCGGGCACGCCCGCCGGAGGTTCAAAACTCTTATTTTTTTCAGTATCTCTGAGCCTAAAAGACAAATAATCAAAACTTTCAACAACGGATCTCTTGGTTCTGGCATCGATGAAGAACGCAGCGAAATGCGATAAGTAATGTGAATTGCAGAATTCAGTGAATCATCGAATCTTTGAACGCACATTGCGCCCGCCGGTATTCCGGCGGGCATGCCTGTTCGAGCGTCATTTCAACCCTCAAGCCTCGGCTTGGTGTTGGGGCGCCCGGGCCCTCCGCGGCCCGGGGCCCCCAAGTTCATCGGCGGGCTCGTCGGTACACTGAGCGCAGTAAAACGCG…	Eukaryota	Fungi	Ascomycota	Pezizomycotina	Sordariomycetes	Sordariomycetidae	NA	Magnaporthales	NA	NA	NA	Pyriculariaceae	Pyricularia	Pyricularia oryzae	Ethiopia	9.2	41
NCBI	MN202869	NA	AGGGATCATTACTGAGTTGAAAAACTCCAACCCCTGTGAACATAACCTCCTGTCGTTGCTTCGGCGGGCACGCCCGCCGGAGGTTCAAAACTCTTATTTTTTTCAGTATCTCTGAGCCTAAAAGACAAATAATCAAAACTTTCAACAACGGATCTCTTGGTTCTGGCATCGATGAAGAACGCAGCGAAATGCGATAAGTAATGTGAATTGCAGAATTCAGTGAATCATCGAATCTTTGAACGCACATTGCGCCCGCCGGTATTCCGGCGGGCATGCCTGTTCGAGCGTCATTTCAACCCTCAAGCCTCGGCTTGGTGTTGGGGCGCCCGGGCCCTCCGCGGCCCGGGGCCCCCAAGTTCATCGGCGGGCTCGTCGGTACACTGAGCGCAGTAAAACGCG…	Eukaryota	Fungi	Ascomycota	Pezizomycotina	Sordariomycetes	Sordariomycetidae	NA	Magnaporthales	NA	NA	NA	Pyriculariaceae	Pyricularia	Pyricularia oryzae	Ethiopia	9.2	41
NCBI	MN202868	NA	AGGGATCATTACTGAGTTGAAAAACTCCAACCCCTGTGAACATAACCTCCTGTCGTTGCTTCGGCGGGCACGCCCGCCGGAGGTTCAAAACTCTTATTTTTTTCAGTATCTCTGAGCCTAAAAGACAAATAATCAAAACTTTCAACAACGGATCTCTTGGTTCTGGCATCGATGAAGAACGCAGCGAAATGCGATAAGTAATGTGAATTGCAGAATTCAGTGAATCATCGAATCTTTGAACGCACATTGCGCCCGCCGGTATTCCGGCGGGCATGCCTGTTCGAGCGTCATTTCAACCCTCAAGCCTCGGCTTGGTGTTGGGGCGCCCGGGCCCTCCGCGGCCCGGGGCCCCCAAGTTCATCGGCGGGCTCGTCGGTACACTGAGCGCAGTAAAACGCG…	Eukaryota	Fungi	Ascomycota	Pezizomycotina	Sordariomycetes	Sordariomycetidae	NA	Magnaporthales	NA	NA	NA	Pyriculariaceae	Pyricularia	Pyricularia oryzae	Ethiopia	9.2	41
NCBI	MN202867	NA	AGGGATCATTACTGAGTTGAAAAACTCCAACCCCTGTGAACATAACCTCCTGTCGTTGCTTCGGCGGGCACGCCCGCCGGAGGTTCAAAACTCTTATTTTTTTCAGTATCTCTGAGCCTAAAAGACAAATAATCAAAACTTTCAACAACGGATCTCTTGGTTCTGGCATCGATGAAGAACGCAGCGAAATGCGATAAGTAATGTGAATTGCAGAATTCAGTGAATCATCGAATCTTTGAACGCACATTGCGCCCGCCGGTATTCCGGCGGGCATGCCTGTTCGAGCGTCATTTCAACCCTCAAGCCTCGGCTTGGTGTTGGGGCGCCCGGGCCCTCCGCGGCCCGGGGCCCCCAAGTTCATCGGCGGGCTCGTCGGTACACTGAGCGCAGTAAAACGCG…	Eukaryota	Fungi	Ascomycota	Pezizomycotina	Sordariomycetes	Sordariomycetidae	NA	Magnaporthales	NA	NA	NA	Pyriculariaceae	Pyricularia	Pyricularia oryzae	Ethiopia	9.2	41
NCBI	MN202866	NA	AGGGATCATTACTGAGTTGAAAAACTCCAACCCCTGTGAACATAACCTCCTGTCGTTGCTTCGGCGGGCACGCCCGCCGGAGGTTCAAAACTCTTATTTTTTTCAGTATCTCTGAGCCTAAAAGACAAATAATCAAAACTTTCAACAACGGATCTCTTGGTTCTGGCATCGATGAAGAACGCAGCGAAATGCGATAAGTAATGTGAATTGCAGAATTCAGTGAATCATCGAATCTTTGAACGCACATTGCGCCCGCCGGTATTCCGGCGGGCATGCCTGTTCGAGCGTCATTTCAACCCTCAAGCCTCGGCTTGGTGTTGGGGCGCCCGGGCCCTCCGCGGCCCGGGGCCCCCAAGTTCATCGGCGGGCTCGTCGGTACACTGAGCGCAGTAAAACGCG…	Eukaryota	Fungi	Ascomycota	Pezizomycotina	Sordariomycetes	Sordariomycetidae	NA	Magnaporthales	NA	NA	NA	Pyriculariaceae	Pyricularia	Pyricularia oryzae	Ethiopia	9.2	41
NCBI	MN202865	NA	AGGGATCATTACTGAGTTGAAAAACTCCAACCCCTGTGAACATAACCTCCTGTCGTTGCTTCGGCGGGCACGCCCGCCGGAGGTTCAAAACTCTTATTTTTTTCAGTATCTCTGAGCCTAAAAGACAAATAATCAAAACTTTCAACAACGGATCTCTTGGTTCTGGCATCGATGAAGAACGCAGCGAAATGCGATAAGTAATGTGAATTGCAGAATTCAGTGAATCATCGAATCTTTGAACGCACATTGCGCCCGCCGGTATTCCGGCGGGCATGCCTGTTCGAGCGTCATTTCAACCCTCAAGCCTCGGCTTGGTGTTGGGGCGCCCGGGCCCTCCGCGGCCCGGGGCCCCCAAGTTCATCGGCGGGCTCGTCGGTTCACTGAGCGCAGTAAAACGCG…	Eukaryota	Fungi	Ascomycota	Pezizomycotina	Sordariomycetes	Sordariomycetidae	NA	Magnaporthales	NA	NA	NA	Pyriculariaceae	Pyricularia	Pyricularia oryzae	Ethiopia	9.2	41
NCBI	MN202864	NA	AGGGATCATTACTGAGTTGAAAAACTCCAACCCCTGTGAACATAACCTCCTGTCGTTGCTTCGGCGGGCACGCCCGCCGGAGGTTCAAAACTCTTATTTTTTTCAGTATCTCTGAGCCTAAAAGACAAATAATCAAAACTTTCAACAACGGATCTCTTGGTTCTGGCATCGATGAAGAACGCAGCGAAATGCGATAAGTAATGTGAATTGCAGAATTCAGTGAATCATCGAATCTTTGAACGCACATTGCGCCCGCCGGTATTCCGGCGGGCATGCCTGTTCGAGCGTCATTTCAACCCTCAAGCCTCGGCTTGGTGTTGGGGCGCCCGGGCCCTCCGCGGCCCGGGGCCCCCAAGTTCATCGGCGGGCTCGTCGGTACACTGAGCGCAGTAAAACGCG…	Eukaryota	Fungi	Ascomycota	Pezizomycotina	Sordariomycetes	Sordariomycetidae	NA	Magnaporthales	NA	NA	NA	Pyriculariaceae	Pyricularia	Pyricularia oryzae	Ethiopia	9.2	41
NCBI	MN202863	NA	AGGGATCATTACTGAGTTGAAAAACTCCAACCCCTGTGAACATAACCTCCTGTCGTTGCTTCGGCGGGCACGCCCGCCGGAGGTTCAAAACTCTTATTTTTTTCAGTATCTCTGAGCCTAAAAGACAAATAATCAAAACTTTCAACAACGGATCTCTTGGTTCTGGCATCGATGAAGAACGCAGCGAAATGCGATAAGTAATGTGAATTGCAGAATTCAGTGAATCATCGAATCTTTGAACGCACATTGCGCCCGCCGGTATTCCGGCGGGCATGCCTGTTCGAGCGTCATTTCAACCCTCAAGCCTCGGCTTGGTGTTGGGGCGCCCGGGCCCTCCGCGGCCCGGGGCCCCCAAGTTCATCGGCGGGCTCGTCGGTACACTGAGCGCAGTAAAACGCG…	Eukaryota	Fungi	Ascomycota	Pezizomycotina	Sordariomycetes	Sordariomycetidae	NA	Magnaporthales	NA	NA	NA	Pyriculariaceae	Pyricularia	Pyricularia oryzae	Ethiopia	9.2	41
NCBI	MN202862	NA	AGGGATCATTACTGAGTTGAAAAACTCCAACCCCTGTGAACATAACCTCCTGTCGTTGCTTCGGCGGGCACGCCCGCCGGAGGTTCAAAACTCTTATTTTTTTCAGTATCTCTGAGCCTAAAAGACAAATAATCAAAACTTTCAACAACGGATCTCTTGGTTCTGGCATCGATGAAGAACGCAGCGAAATGCGATAAGTAATGTGAATTGCAGAATTCAGTGAATCATCGAATCTTTGAACGCACATTGCGCCCGCCGGTATTCCGGCGGGCATGCCTGTTCGAGCGTCATTTCAACCCTCAAGCCTCGGCTTGGTGTTGGGGCGCCCGGGCCCTCCGCGGCCCGGGGCCCCCAAGTTCATCGGCGGGCTCGTCGGTACACTGAGCGCAGTAAAACGCG…	Eukaryota	Fungi	Ascomycota	Pezizomycotina	Sordariomycetes	Sordariomycetidae	NA	Magnaporthales	NA	NA	NA	Pyriculariaceae	Pyricularia	Pyricularia oryzae	Ethiopia	9.2	41
NCBI	MN202861	NA	AGGGATCATTACTGAGTTGAAAAACTCCAACCCCTGTGAACATAACCTCCTGTCGTTGCTTCGGCGGGCACGCCCGCCGGAGGTTCAAAACTCTTATTTTTTTCAGTATCTCTGAGCCTAAAAGACAAATAATCAAAACTTTCAACAACGGATCTCTTGGTCTGGCATCGATGAAGAACGCAGCGAAATGCGATAAGTAATGTGAATTGCAGAATTCAGTGAATCATCGAATCTTTGAACGCACATTGCGCCCGCCGGTATTCCGGCGGGCATGCCTGTTCGAGCGTCATTTCAACCCTCAAGCCTCGGCTTGGTGTTGGGGCGCCCGGGCCCTCCGCGGCCCGGGGCCCCCAAGTTCATCGGCGGGCTCGTCGGTACACTGAGCGCAGTAAAACGCGG…	Eukaryota	Fungi	Ascomycota	Pezizomycotina	Sordariomycetes	Sordariomycetidae	NA	Magnaporthales	NA	NA	NA	Pyriculariaceae	Pyricularia	Pyricularia oryzae	Ethiopia	9.2	41
NCBI	MN202860	NA	AGGGATCATTACTGAGTTGAAAAACTCCAACCCCTGTGAACATAACCTCCTGTCGTTGCTTCGGCGGGCACGCCCGCCGGAGGTTCAAAACTCTTATTTTTTTCAGTATCTCTGAGCCTAAAAGACAAATAATCAAAACTTTCAACAACGGATCTCTTGGTTCTGGCATCGATGAAGAACGCAGCGAAATGCGATAAGTAATGTGAATTGCAGAATTCAGTGAATCATCGAATCTTTGAACGCACATTGCGCCCGCCGGTATTCCGGCGGGCATGCCTGTTCGAGCGTCATTTCAACCCTCAAGCCTCGGCTTGGTGTTGGGGCGCCCGGGCCCTCCGCGGCCCGGGGCCCCCAAGTTCATCGGCGGGCTCGTCGGTACACTGAGCGCAGTAAAACGCG…	Eukaryota	Fungi	Ascomycota	Pezizomycotina	Sordariomycetes	Sordariomycetidae	NA	Magnaporthales	NA	NA	NA	Pyriculariaceae	Pyricularia	Pyricularia oryzae	Ethiopia	9.2	41
NCBI	MN202859	NA	AGGGATCATTACTGAGTTGAAAAACTCCAACCCCTGTGAACATAACCTCCTGTCGTTGCTTCGGCGGGCACGCCCGCCGGAGGTTCAAAACTCTTATTTTTTTCAGTATCTCTGAGCCTAAAAGACAAATAATCAAAACTTTCAACAACGGATCTCTTGGTTCTGGCATCGATGAAGAACGCAGCGAAATGCGATAAGTAATGTGAATTGCAGAATTCAGTGAATCATCGAATCTTTGAACGCACATTGCGCCCGCCGGTATTCCGGCGGGCATGCCTGTTCGAGCGTCATTTCAACCCTCAAGCCTCGGCTTGGTGTTGGGGCGCCCGGGCCCTCCGCGGCCCGGGGCCCCCAAGTTCATCGGCGGGCTCGTCGGTACACTGAGCGCAGTAAAACGCG…	Eukaryota	Fungi	Ascomycota	Pezizomycotina	Sordariomycetes	Sordariomycetidae	NA	Magnaporthales	NA	NA	NA	Pyriculariaceae	Pyricularia	Pyricularia oryzae	Ethiopia	9.2	41
NCBI	MN202858	NA	AGGGATCATTACTGAGTTGAAAAACTCCAACCCCTGTGAACATAACCTCCTGTCGTTGCTTCGGCGGGCACGCCCGCCGGAGGTTCAAAACTCTTATTTTTTTCAGTATCTCTGAGCCTAAAAGACAAATAATCAAAACTTTCAACAACGGATCTCTTGGTTCTGGCATCGATGAAGAACGCAGCGAAATGCGATAAGTAATGTGAATTGCAGAATTCAGTGAATCATCGAATCTTTGAACGCACATTGCGCCCGCCGGTATTCCGGCGGGCATGCCTGTTCGAGCGTCATTTCAACCCTCAAGCCTCGGCTTGGTGTTGGGGCGCCCGGGCCCTCCGCGGCCCGGGGCCCCCAAGTTCATCGGCGGGCTCGTCGGTACACTGAGCGCAGTAAAACGCG…	Eukaryota	Fungi	Ascomycota	Pezizomycotina	Sordariomycetes	Sordariomycetidae	NA	Magnaporthales	NA	NA	NA	Pyriculariaceae	Pyricularia	Pyricularia oryzae	Ethiopia	9.2	41
NCBI	MN202857	NA	AGGGATCATTACTGAGTTGAAAAACTCCAACCCCTGTGAACATAACCTCCTGTCGTTGCTTCGGCGGGCACGCCCGCCGGAGGTTCAAAACTCTTATTTTTTTCAGTATCTCTGAGCCTAAAAGACAAATAATCAAAACTTTCAACAACGGATCTCTTGGTTCTGGCATCGATGAAGAACGCAGCGAAATGCGATAAGTAATGTGAATTGCAGAATTCAGTGAATCATCGAATCTTTGAACGCACATTGCGCCCGCCGGTATTCCGGCGGGCATGCCTGTTCGAGCGTCATTTCAACCCTCAAGCCTCGGCTTGGTGTTGGGGCGCCCGGGCCCTCCGCGGCCCGGGGCCCCCAAGTTCATCGGCGGGCTCGTCGGTACACTGAGCGCAGTAAAACGCG…	Eukaryota	Fungi	Ascomycota	Pezizomycotina	Sordariomycetes	Sordariomycetidae	NA	Magnaporthales	NA	NA	NA	Pyriculariaceae	Pyricularia	Pyricularia oryzae	Ethiopia	9.2	41
NCBI	MN202856	NA	AGGGATCATTACTGAGTTGAAAAACTCCAACCCCTGTGAACATAACCTCCTGTCGTTGCTTCGGCGGGCACGCCCGCCGGAGGTTCAAAACTCTTATTTTTTTCAGTATCTCTGAGCCTAAAAGACAAATAATCAAAACTTTCAACAACGGATCTCTTGGTTCTGGCATCGATGAAGAACGCAGCGAAATGCGATAAGTAATGTGAATTGCAGAATTCAGTGAATCATCGAATCTTTGAACGCACATTGCGCCCGCCGGTATTCCGGCGGGCATGCCTGTTCGAGCGTCATTTCAACCCTCAAGCCTCGGCTTGGTGTTGGGGCGCCCGGGCCCTCCGCGGCCCGGGGCCCCCAAGTTCATCGGCGGGCTCGTCGGTACACTGAGCGCAGTAAAACGCG…	Eukaryota	Fungi	Ascomycota	Pezizomycotina	Sordariomycetes	Sordariomycetidae	NA	Magnaporthales	NA	NA	NA	Pyriculariaceae	Pyricularia	Pyricularia oryzae	Ethiopia	9.2	41
NCBI	MN202855	NA	AGGGATCATTACTGAGTTGAAAAACTCCAACCCCTGTGAACATAACCTCCTGTCGTTGCTTCGGCGGGCACGCCCGCCGGAGGTTCAAAACTCTTATTTTTTTCAGTATCTCTGAGCCTAAAAGACAAATAATCAAAACTTTCAACAACGGATCTCTTGGTTCTGGCATCGATGAAGAACGCAGCGAAATGCGATAAGTAATGTGAATTGCAGAATTCAGTGAATCATCGAATCTTTGAACGCACATTGCGCCCGCCGGTATTCCGGCGGGCATGCCTGTTCGAGCGTCATTTCAACCCTCAAGCCTCGGCTTGGTGTTGGGGCGCCCGGGCCCTCCGCGGCCCGGGGCCCCCAAGTTCATCGGCGGGCTCGTCGGTACACTGAGCGCAGTAAAACGCG…	Eukaryota	Fungi	Ascomycota	Pezizomycotina	Sordariomycetes	Sordariomycetidae	NA	Magnaporthales	NA	NA	NA	Pyriculariaceae	Pyricularia	Pyricularia oryzae	Ethiopia	9.2	41
NCBI	MN202854	NA	AGGGATCATTACTGAGTTGAAAAACTCCAACCCCTGTGAACATAACCTCCTGTCGTTGCTTCGGCGGGCACGCCCGCCGGAGGTTCAAAACTCTTATTTTTTTCAGTATCTCTGAGCCTAAAAGACAAATAATCAAAACTTTCAACAACGGATCTCTTGGTTCTGGCATCGATGAAGAACGCAGCGAAATGCGATAAGTAATGTGAATTGCAGAATTCAGTGAATCATCGAATCTTTGAACGCACATTGCGCCCGCCGGTATTCCGGCGGGCATGCCTGTTCGAGCGTCATTTCAACCCTCAAGCCTCGGCTTGGTGTTGGGGCGCCCGGGCCCTCCGCGGCCCGGGGCCCCCAAGTTCATCGGCGGGCTCGTCGGTACACTGAGCGCAGTAAAACGCG…	Eukaryota	Fungi	Ascomycota	Pezizomycotina	Sordariomycetes	Sordariomycetidae	NA	Magnaporthales	NA	NA	NA	Pyriculariaceae	Pyricularia	Pyricularia oryzae	Ethiopia	9.2	41
NCBI	MN202853	NA	AGGGATCATTACTGAGTTGAAAAACTCCAACCCCTGTGAACATAACCTCCTGTCGTTGCTTCGGCGGGCACGCCCGCCGGAGGTTCAAAACTCTTATTTTTTTCAGTATCTCTGAGCCTAAAAGACAAATAATCAAAACTTTCAACAACGGATCTCTTGGTTCTGGCATCGATGAAGAACGCAGCGAAATGCGATAAGTAATGTGAATTGCAGAATTCAGTGAATCATCGAATCTTTGAACGCACATTGCGCCCGCCGGTATTCCGGCGGGCATGCCTGTTCGAGCGTCATTTCAACCCTCAAGCCTCGGCTTGGTGTTGGGGCGCCCGGGCCCTCCGCGGCCCGGGGCCCCCAAGTTCATCGGCGGGCTCGTCGGTACACTGAGCGCAGTAAAACGCG…	Eukaryota	Fungi	Ascomycota	Pezizomycotina	Sordariomycetes	Sordariomycetidae	NA	Magnaporthales	NA	NA	NA	Pyriculariaceae	Pyricularia	Pyricularia oryzae	Ethiopia	9.2	41
NCBI	MN202852	NA	AGGGATCATTACTGAGTTGAAAAACTCCAACCCCTGTGAACATAACCTCCTGTCGTTGCTTCGGCGGGCACGCCCGCCGGAGGTTCAAAACTCTTATTTTTTTCAGTATCTCTGAGCCTAAAAGACAAATAATCAAAACTTTCAACAACGGATCTCTTGGTTCTGGCATCGATGAAGAACGCAGCGAAATGCGATAAGTAATGTGAATTGCAGAATTCAGTGAATCATCGAATCTTTGAACGCACATTGCGCCCGCCGGTATTCCGGCGGGCATGCCTGTTCGAGCGTCATTTCAACCCTCAAGCCTCGGCTTGGTGTTGGGGCGCCCGGGCCCTCCGCGGCCCGGGGCCCCCAAGTTCATCGGCGGGCTCGTCGGTACACTGAGCGCAGTAAAACGCG…	Eukaryota	Fungi	Ascomycota	Pezizomycotina	Sordariomycetes	Sordariomycetidae	NA	Magnaporthales	NA	NA	NA	Pyriculariaceae	Pyricularia	Pyricularia oryzae	Ethiopia	9.2	41
NCBI	MN202851	NA	AGGGATCATTACTGAGTTGAAAAACTCCAACCCCTGTGAACATAACCTCCTGTCGTTGCTTCGGCGGGCACGCCCGCCGGAGGTTCAAAACTCTTATTTTTTTCAGTATCTCTGAGCCTAAAAGACAAATAATCAAAACTTTCAACAACGGATCTCTTGGTTCTGGCATCGATGAAGAACGCAGCGAAATGCGATAAGTAATGTGAATTGCAGAATTCAGTGAATCATCGAATCTTTGAACGCACATTGCGCCCGCCGGTATTCCGGCGGGCATGCCTGTTCGAGCGTCATTTCAACCCTCAAGCCTCGGCTTGGTGTTGGGGCGCCCGGGCCCTCCGCGGCCCGGGGCCCCCAAGTTCATCGGCGGGCTCGTCGGTTCACTGAGCGCAGTAAAACGCG…	Eukaryota	Fungi	Ascomycota	Pezizomycotina	Sordariomycetes	Sordariomycetidae	NA	Magnaporthales	NA	NA	NA	Pyriculariaceae	Pyricularia	Pyricularia oryzae	Ethiopia	9.2	41
NCBI	MN202850	NA	AGGGATCATTACTGAGTTGAAAAACTCCAACCCCTGTGAACATAACCTCCTGTCGTTGCTTCGGCGGGCACGCCCGCCGGAGGTTCAAAACTCTTATTTTTTTCAGTATCTCTGAGCCTAAAAGACAAATAATCAAAACTTTCAACAACGGATCTCTTGGTTCTGGCATCGATGAAGAACGCAGCGAAATGCGATAAGTAATGTGAATTGCAGAATTCAGTGAATCATCGAATCTTTGAACGCACATTGCGCCCGCCGGTATTCCGGCGGGCATGCCTGTTCGAGCGTCATTTCAACCCTCAAGCCTCGGCTTGGTGTTGGGGCGCCCGGGCCCTCCGCGGCCCGGGGCCCCCAAGTTCATCGGCGGGCTCGTCGGTACACTGAGCGCAGTAAAACGCG…	Eukaryota	Fungi	Ascomycota	Pezizomycotina	Sordariomycetes	Sordariomycetidae	NA	Magnaporthales	NA	NA	NA	Pyriculariaceae	Pyricularia	Pyricularia oryzae	Ethiopia	9.2	41
NCBI	MN202849	NA	AGGGATCATTACTGAGTTGAAAAACTCCAACCCCTGTGAACATAACCTCCTGTCGTTGCTTCGGCGGGCACGCCCGCCGGAGGTTCAAAACTCTTATTTTTTTCAGTATCTCTGAGCCTAAAAGACAAATAATCAAAACTTTCAACAACGGATCTCTTGGTTCTGGCATCGATGAAGAACGCAGCGAAATGCGATAAGTAATGTGAATTGCAGAATTCAGTGAATCATCGAATCTTTGAACGCACATTGCGCCCGCCGGTATTCCGGCGGGCATGCCTGTTCGAGCGTCATTTCAACCCTCAAGCCTCGGCTTGGTGTTGGGGCGCCCGGGCCCTCCGCGGCCCGGGGCCCCCAAGTTCATCGGCGGGCTCGTCGGTACACTGAGCGCAGTAAAACGCG…	Eukaryota	Fungi	Ascomycota	Pezizomycotina	Sordariomycetes	Sordariomycetidae	NA	Magnaporthales	NA	NA	NA	Pyriculariaceae	Pyricularia	Pyricularia oryzae	Ethiopia	9.2	41
NCBI	MN202848	NA	AGGGATCATTACTGAGTTGAAAAACTCCAACCCCTGTGAACATAACCTCCTGTCGTTGCTTCGGCGGGCACGCCCGCCGGAGGTTCAAAACTCTTATTTTTTTCAGTATCTCTGAGCCTAAAAGACAAATAATCAAAACTTTCAACAACGGATCTCTTGGTTCTGGCATCGATGAAGAACGCAGCGAAATGCGATAAGTAATGTGAATTGCAGAATTCAGTGAATCATCGAATCTTTGAACGCACATTGCGCCCGCCGGTATTCCGGCGGGCATGCCTGTTCGAGCGTCATTTCAACCCTCAAGCCTCGGCTTGGTGTTGGGGCGCCCGGGCCCTCCGCGGCCCGGGGCCCCCAAGTTCATCGGCGGGCTCGTCGGTACACTGAGCGCAGTAAAACGCG…	Eukaryota	Fungi	Ascomycota	Pezizomycotina	Sordariomycetes	Sordariomycetidae	NA	Magnaporthales	NA	NA	NA	Pyriculariaceae	Pyricularia	Pyricularia oryzae	Ethiopia	9.2	41
NCBI	MN202847	NA	AGGGATCATTACTGAGTTGAAAAACTCCAACCCCTGTGAACATAACCTCCTGTCGTTGCTTCGGCGGGCACGCCCGCCGGAGGTTCAAAACTCTTATTTTTTTCAGTATCTCTGAGCCTAAAAGACAAATAATCAAAACTTTCAACAACGGATCTCTTGGTTCTGGCATCGATGAAGAACGCAGCGAAATGCGATAAGTAATGTGAATTGCAGAATTCAGTGAATCATCGAATCTTTGAACGCACATTGCGCCCGCCGGTATTCCGGCGGGCATGCCTGTTCGAGCGTCATTTCAACCCTCAAGCCTCGGCTTGGTGTTGGGGCGCCCGGGCCCTCCGCGGCCCGGGGCCCCCAAGTTCATCGGCGGGCTCGTCGGTACACTGAGCGCAGTAAAACGCG…	Eukaryota	Fungi	Ascomycota	Pezizomycotina	Sordariomycetes	Sordariomycetidae	NA	Magnaporthales	NA	NA	NA	Pyriculariaceae	Pyricularia	Pyricularia oryzae	Ethiopia	9.2	41
NCBI	MN202846	NA	AGGGATCATTACTGAGTTGAAAAACTCCAACCCCTGTGAACATAACCTCCTGTCGTTGCTTCGGCGGGCACGCCCGCCGGAGGTTCAAAACTCTTATTTTTTTCAGTATCTCTGAGCCTAAAAGACAAATAATCAAAACTTTCAACAACGGATCTCTTGGTTCTGGCATCGATGAAGAACGCAGCGAAATGCGATAAGTAATGTGAATTGCAGAATTCAGTGAATCATCGAATCTTTGAACGCACATTGCGCCCGCCGGTATTCCGGCGGGCATGCCTGTTCGAGCGTCATTTCAACCCTCAAGCCTCGGCTTGGTGTTGGGGCGCCCGGGCCCTCCGCGGCCCGGGGCCCCCAAGTTCATCGGCGGGCTCGTCGGTACACTGAGCGCAGTAAAACGCG…	Eukaryota	Fungi	Ascomycota	Pezizomycotina	Sordariomycetes	Sordariomycetidae	NA	Magnaporthales	NA	NA	NA	Pyriculariaceae	Pyricularia	Pyricularia oryzae	Ethiopia	9.2	41
NCBI	MN202845	NA	AGGGATCATTACTGAGTTGAAAAACTCCAACCCCTGTGAACATAACCTCCTGTCGTTGCTTCGGCGGGCACGCCCGCCGGAGGTTCAAAACTCTTATTTTTTTCAGTATCTCTGAGCCTAAAAGACAAATAATCAAAACTTTCAACAACGGATCTCTTGGTTCTGGCATCGATGAAGAACGCAGCGAAATGCGATAAGTAATGTGAATTGCAGAATTCAGTGAATCATCGAATCTTTGAACGCACATTGCGCCCGCCGGTATTCCGGCGGGCATGCCTGTTCGAGCGTCATTTCAACCCTCAAGCCTCGGCTTGGTGTTGGGGCGCCCGGGCCCTCCGCGGCCCGGGGCCCCCAAGTTCATCGGCGGGCTCGTCGGTACACTGAGCGCAGTAAAACGCG…	Eukaryota	Fungi	Ascomycota	Pezizomycotina	Sordariomycetes	Sordariomycetidae	NA	Magnaporthales	NA	NA	NA	Pyriculariaceae	Pyricularia	Pyricularia oryzae	Ethiopia	9.2	41
NCBI	MN202843	NA	AGGGATCATTACTGAGTTGAAAAACTCCAACCCCTGTGAACATAACCTCCTGTCGTTGCTTCGGCGGGCACGCCCGCCGGAGGTTCAAAACTCTTATTTTTTTCAGTATCTCTGAGCCTAAAAGACAAATAATCAAAACTTTCAACAACGGATCTCTTGGTTCTGGCATCGATGAAGAACGCAGCGAAATGCGATAAGTAATGTGAATTGCAGAATTCAGTGAATCATCGAATCTTTGAACGCACATTGCGCCCGCCGGTATTCCGGCGGGCATGCCTGTTCGAGCGTCATTTCAACCCTCAAGCCTCGGCTTGGTGTTGGGGCGCCCGGGCCCTCCGCGGCCCGGGGCCCCCAAGTTCATCGGCGGGCTCGTCGGTACACTGAGCGCAGTAAAACGCG…	Eukaryota	Fungi	Ascomycota	Pezizomycotina	Sordariomycetes	Sordariomycetidae	NA	Magnaporthales	NA	NA	NA	Pyriculariaceae	Pyricularia	Pyricularia oryzae	Ethiopia	9.2	41
NCBI	MN202842	NA	AGGGATCATTACTGAGTTGAAAAACTCCAACCCCTGTGAACATAACCTCCTGTCGTTGCTTCGGCGGGCACGCCCGCCGGAGGTTCAAAACTCTTATTTTTTTCAGTATCTCTGAGCCTAAAAGACAAATAATCAAAACTTTCAACAACGGATCTCTTGGTTCTGGCATCGATGAAGAACGCAGCGAAATGCGATAAGTAATGTGAATTGCAGAATTCAGTGAATCATCGAATCTTTGAACGCACATTGCGCCCGCCGGTATTCCGGCGGGCATGCCTGTTCGAGCGTCATTTCAACCCTCAAGCCTCGGCTTGGTGTTGGGGCGCCCGGGCCCTCCGCGGCCCGGGGCCCCCAAGTTCATCGGCGGGCTCGTCGGTACACTGAGCGCAGTAAAACGCG…	Eukaryota	Fungi	Ascomycota	Pezizomycotina	Sordariomycetes	Sordariomycetidae	NA	Magnaporthales	NA	NA	NA	Pyriculariaceae	Pyricularia	Pyricularia oryzae	Ethiopia	9.2	41
NCBI	MN202841	NA	AGGGATCATTACTGAGTTGAAAAACTCCAACCCCTGTGAACATAACCTCCTGTCGTTGCTTCGGCGGGCACGCCCGCCGGAGGTTCAAAACTCTTATTTTTTTCAGTATCTCTGAGCCTAAAAGACAAATAATCAAAACTTTCAACAACGGATCTCTTGGTTCTGGCATCGATGAAGAACGCAGCGAAATGCGATAAGTAATGTGAATTGCAGAATTCAGTGAATCATCGAATCTTTGAACGCACATTGCGCCCGCCGGTATTCCGGCGGGCATGCCTGTTCGAGCGTCATTTCAACCCTCAAGCCTCGGCTTGGTGTTGGGGCGCCCGGGCCCTCCGCGGCCCGGGGCCCCCAAGTTCATCGGCGGGCTCGTCGGTACACTGAGCGCAGTAAAACGCG…	Eukaryota	Fungi	Ascomycota	Pezizomycotina	Sordariomycetes	Sordariomycetidae	NA	Magnaporthales	NA	NA	NA	Pyriculariaceae	Pyricularia	Pyricularia oryzae	Ethiopia	9.2	41
NCBI	MN202840	NA	AGGGATCATTACTGAGTTGAAAAACTCCAACCCCTGTGAACATAACCTCCTGTCGTTGCTTCGGCGGGCACGCCCGCCGGAGGTTCAAAACTCTTATTTTTTTCAGTATCTCTGAGCCTAAAAGACAAATAATCAAAACTTTCAACAACGGATCTCTTGGTTCTGGCATCGATGAAGAACGCAGCGAAATGCGATAAGTAATGTGAATTGCAGAATTCAGTGAATCATCGAATCTTTGAACGCACATTGCGCCCGCCGGTATTCCGGCGGGCATGCCTGTTCGAGCGTCATTTCAACCCTCAAGCCTCGGCTTGGTGTTGGGGCGCCCGGGCCCTCCGCGGCCCGGGGCCCCCAAGTTCATCGGCGGGCTCGTCGGTACACTGAGCGCAGTAAAACGCG…	Eukaryota	Fungi	Ascomycota	Pezizomycotina	Sordariomycetes	Sordariomycetidae	NA	Magnaporthales	NA	NA	NA	Pyriculariaceae	Pyricularia	Pyricularia oryzae	Ethiopia	9.2	41
NCBI	MN202839	NA	AGGGATCATTACTGAGTTGAAAAACTCCAACCCCTGTGAACATAACCTCCTGTCGTTGCTTCGGCGGGCACGCCCGCCGGAGGTTCAAAACTCTTATTTTTTTCAGTATCTCTGAGCCTAAAAGACAAATAATCAAAACTTTCAACAACGGATCTCTTGGTTCTGGCATCGATGAAGAACGCAGCGAAATGCGATAAGTAATGTGAATTGCAGAATTCAGTGAATCATCGAATCTTTGAACGCACATTGCGCCCGCCGGTATTCCGGCGGGCATGCCTGTTCGAGCGTCATTTCAACCCTCAAGCCTCGGCTTGGTGTTGGGGCGCCCGGGCCCTCCGCGGCCCGGGGCCCCCAAGTTCATCGGCGGGCTCGTCGGTACACTGAGCGCAGTAAAACGCG…	Eukaryota	Fungi	Ascomycota	Pezizomycotina	Sordariomycetes	Sordariomycetidae	NA	Magnaporthales	NA	NA	NA	Pyriculariaceae	Pyricularia	Pyricularia oryzae	Ethiopia	9.2	41
NCBI	MN202838	NA	AGGGATCATTACTGAGTTGAAAAACTCCAACCCCTGTGAACATAACCTCCTGTCGTTGCTTCGGCGGGCACGCCCGCCGGAGGTTCAAAACTCTTATTTTTTTCAGTATCTCTGAGCCTAAAAGACAAATAATCAAAACTTTCAACAACGGATCTCTTGGTTCTGGCATCGATGAAGAACGCAGCGAAATGCGATAAGTAATGTGAATTGCAGAATTCAGTGAATCATCGAATCTTTGAACGCACATTGCGCCCGCCGGTATTCCGGCGGGCATGCCTGTTCGAGCGTCATTTCAACCCTCAAGCCTCGGCTTGGTGTTGGGGCGCCCGGGCCCTCCGCGGCCCGGGGCCCCCAAGTTCATCGGCGGGCTCGTCGGTACACTGAGCGCAGTAAAACGCG…	Eukaryota	Fungi	Ascomycota	Pezizomycotina	Sordariomycetes	Sordariomycetidae	NA	Magnaporthales	NA	NA	NA	Pyriculariaceae	Pyricularia	Pyricularia oryzae	Ethiopia	9.2	41
NCBI	MN202837	NA	AGGGATCATTACTGAGTTGAAAAACTCCAACCCCTGTGAACATAACCTCCTGTCGTTGCTTCGGCGGGCACGCCCGCCGGAGGTTCAAAACTCTTATTTTTTTCAGTATCTCTGAGCCTAAAAGACAAATAATCAAAACTTTCAACAACGGATCTCTTGGTTCTGGCATCGATGAAGAACGCAGCGAAATGCGATAAGTAATGTGAATTGCAGAATTCAGTGAATCATCGAATCTTTGAACGCACATTGCGCCCGCCGGTATTCCGGCGGGCATGCCTGTTCGAGCGTCATTTCAACCCTCAAGCCTCGGCTTGGTGTTGGGGCGCCCGGGCCCTCCGCGGCCCGGGGCCCCCAAGTTCATCGGCGGGCTCGTCGGTACACTGAGCGCAGTAAAACGCG…	Eukaryota	Fungi	Ascomycota	Pezizomycotina	Sordariomycetes	Sordariomycetidae	NA	Magnaporthales	NA	NA	NA	Pyriculariaceae	Pyricularia	Pyricularia oryzae	Ethiopia	9.2	41
NCBI	MN202836	NA	AGGGATCATTACTGAGTTGAAAAACTCCAACCCCTGTGAACATAACCTCCTGTCGTTGCTTCGGCGGGCACGCCCGCCGGAGGTTCAAAACTCTTATTTTTTTCAGTATCTCTGAGCCTAAAAGACAAATAATCAAAACTTTCAACAACGGATCTCTTGGTTCTGGCATCGATGAAGAACGCAGCGAAATGCGATAAGTAATGTGAATTGCAGAATTCAGTGAATCATCGAATCTTTGAACGCACATTGCGCCCGCCGGTATTCCGGCGGGCATGCCTGTTCGAGCGTCATTTCAACCCTCAAGCCTCGGCTTGGTGTTGGGGCGCCCGGGCCCTCCGCGGCCCGGGGCCCCCAAGTTCATCGGCGGGCTCGTCGGTACACTGAGCGCAGTAAAACGCG…	Eukaryota	Fungi	Ascomycota	Pezizomycotina	Sordariomycetes	Sordariomycetidae	NA	Magnaporthales	NA	NA	NA	Pyriculariaceae	Pyricularia	Pyricularia oryzae	Ethiopia	9.2	41
NCBI	MN202835	NA	AGGGATCATTACTGAGTTGAAAAACTCCAACCCCTGTGAACATAACCTCCTGTCGTTGCTTCGGCGGGCACGCCCGCCGGAGGTTCAAAACTCTTATTTTTTTCAGTATCTCTGAGCCTAAAAGACAAATAATCAAAACTTTCAACAACGGATCTCTTGGTTCTGGCATCGATGAAGAACGCAGCGAAATGCGATAAGTAATGTGAATTGCAGAATTCAGTGAATCATCGAATCTTTGAACGCACATTGCGCCCGCCGGTATTCCGGCGGGCATGCCTGTTCGAGCGTCATTTCAACCCTCAAGCCTCGGCTTGGTGTTGGGGCGCCCGGGCCCTCCGCGGCCCGGGGCCCCCAAGTTCATCGGCGGGCTCGTCGGTTCACTGAGCGCAGTAAAACGCG…	Eukaryota	Fungi	Ascomycota	Pezizomycotina	Sordariomycetes	Sordariomycetidae	NA	Magnaporthales	NA	NA	NA	Pyriculariaceae	Pyricularia	Pyricularia oryzae	Ethiopia	9.2	41
NCBI	MN202834	NA	AGGGATCATTACTGAGTTGAAAAACTCCAACCCCTGTGAACATAACCTCCTGTCGTTGCTTCGGCGGGCACGCCCGCCGGAGGTTCAAAACTCTTATTTTTTTCAGTATCTCTGAGCCTAAAAGACAAATAATCAAAACTTTCAACAACGGATCTCTTGGTTCTGGCATCGATGAAGAACGCAGCGAAATGCGATAAGTAATGTGAATTGCAGAATTCAGTGAATCATCGAATCTTTGAACGCACATTGCGCCCGCCGGTATTCCGGCGGGCATGCCTGTTCGAGCGTCATTTCAACCCTCAAGCCTCGGCTTGGTGTTGGGGCGCCCGGGCCCTCCGCGGCCCGGGGCCCCCAAGTTCATCGGCGGGCTCGTCGGTACACTGAGCGCAGTAAAACGCG…	Eukaryota	Fungi	Ascomycota	Pezizomycotina	Sordariomycetes	Sordariomycetidae	NA	Magnaporthales	NA	NA	NA	Pyriculariaceae	Pyricularia	Pyricularia oryzae	Ethiopia	9.2	41
NCBI	MN202833	NA	AGGGATCATTACTGAGTTGAAAAACTCCAACCCCTGTGAACATAACCTCCTGTCGTTGCTTCGGCGGGCACGCCCGCCGGAGGTTCAAAACTCTTATTTTTTTCAGTATCTCTGAGCCTAAAAGACAAATAATCAAAACTTTCAACAACGGATCTCTTGGTTCTGGCATCGATGAAGAACGCAGCGAAATGCGATAAGTAATGTGAATTGCAGAATTCAGTGAATCATCGAATCTTTGAACGCACATTGCGCCCGCCGGTATTCCGGCGGGCATGCCTGTTCGAGCGTCATTTCAACCCTCAAGCCTCGGCTTGGTGTTGGGGCGCCCGGGCCCTCCGCGGCCCGGGGCCCCCAAGTTCATCGGCGGGCTCGTCGGTTCACTGAGCGCAGTAAAACGCG…	Eukaryota	Fungi	Ascomycota	Pezizomycotina	Sordariomycetes	Sordariomycetidae	NA	Magnaporthales	NA	NA	NA	Pyriculariaceae	Pyricularia	Pyricularia oryzae	Ethiopia	9.2	41
NCBI	MT757313	NA	TAAAAGTCGTAACAAGGTCTCCGTTGGTGAACCAGCGGAGGGATCATTACTGAGTTGAAAAACTCCAACCCCTGTGAACATAACCTCTGTCGTTGCTTCGGCGGGCACGCCCGCCGGAGGTTCAAAACTCTTATTTTTTCCAGTATCTCTGAGCCTGAAAGACAAATAATCAAAACTTTCAACAACGGATCTCTTGGTTCTGGCATCGATGAAGAACGCAGCGAAATGCGATAAGTAATGTGAATTGCAGAATTCAGTGAATCATCGAATCTTTGAACGCACATTGCGCCCGCCGGTATTCCGGCGGGCATGCCTGTTCGAGCGTCATTTCAACCCTCAAGCCTCGGCTTGGTGTTGGGGCGCCCGGGCCCTCCGCGGCCCGGGGCCCCCAAGTTCATC…	Eukaryota	Fungi	Ascomycota	Pezizomycotina	Sordariomycetes	Sordariomycetidae	NA	Magnaporthales	NA	NA	NA	Pyriculariaceae	Pyricularia	Pyricularia oryzae	India:Karnataka	14.2	74.9
NCBI	MT757312	NA	TAAAAGTCGTAACAAGGTCTCCGTTGGTGAACCAGCGGAGGGATCATTACTGAGTTGAAAAACTCCAACCCCTGTGAACATAACCTCTGTCGTTGCTTCGGCGGGCACGCCCGCCGGAGGTTCAAAACTCTTATTTTTTCCAGTATCTCTGAGCCTGAAAGACAAATAATCAAAACTTTCAACAACGGATCTCTTGGTTCTGGCATCGATGAAGAACGCAGCGAAATGCGATAAGTAATGTGAATTGCAGAATTCAGTGAATCATCGAATCTTTGAACGCACATTGCGCCCGCCGGTATTCCGGCGGGCATGCCTGTTCGAGCGTCATTTCAACCCTCAAGCCTCGGCTTGGTGTTGGGGCGCCCGGGCCCTCCGCGGCCCGGGGCCCCCAAGTTCATC…	Eukaryota	Fungi	Ascomycota	Pezizomycotina	Sordariomycetes	Sordariomycetidae	NA	Magnaporthales	NA	NA	NA	Pyriculariaceae	Pyricularia	Pyricularia oryzae	India:Karnataka	14.3	74.9
NCBI	MT757311	NA	TAAAAGTCGTAACAAGGTTTCCGTAGGTGAACCTGCGGAAGGATCATTACCGAGTGAGGGCTGCCTCCGGGCGCCCAACCTCCCACCCGTGAATACCTAACACTGTTGCTTCGGCGGGGAGCCCTCTCGGGGGCGAGCCGCCGGAGACCACTGAACTTCATGCCTGTAGTGATGAGTCTGAGCCTAAATGAAAATTTAGTCAAAACTTTCAACAATGGATCTCTTGGTTCCGGCATCGATGAAGAACGCAGCGAACTGCGATAAGTAATGTGAATTGCAGAATTCAGTGAATCATCGAGTCTTTGAACGCACATTGCGCCCCCTGGCATTCCGGGGGGCATGCCTGTCCGAGCGTCATTGCTGCCCTTCAAGCCCGGCTTGTGTGTTGGGTCGTCGTCC…	Eukaryota	Fungi	Ascomycota	Pezizomycotina	Sordariomycetes	Sordariomycetidae	NA	Magnaporthales	NA	NA	NA	Pyriculariaceae	Pyricularia	Pyricularia oryzae	India:Karnataka	15	75.1
NCBI	MT757310	NA	TAAAAGTCGTAACAAGGTCTCCGTTGGTGAACCAGCGGAGGGATCATTACTGAGTTGAAAAACTCCAACCCCTGTGAACATAACCTCTGTCGTTGCTTCGGCGGGCACGCCCGCCGGAGGTTCAAAACTCTTATTTTTTCCAGTATCTCTGAGCCTGAAAGACAAATAATCAAAACTTTCAACAACGGATCTCTTGGTTCTGGCATCGATGAAGAACGCAGCGAAATGCGATAAGTAATGTGAATTGCAGAATTCAGTGAATCATCGAATCTTTGAACGCACATTGCGCCCGCCGGTATTCCGGCGGGCATGCCTGTTCGAGCGTCATTTCAACCCTCAAGCCTCGGCTTGGTGTTGGGGCGCCCGGGCCCTCCGCGGCCCGGGGCCCCCAAGTTCATC…	Eukaryota	Fungi	Ascomycota	Pezizomycotina	Sordariomycetes	Sordariomycetidae	NA	Magnaporthales	NA	NA	NA	Pyriculariaceae	Pyricularia	Pyricularia oryzae	India:Karnataka	14	75.6
NCBI	MT757309	NA	GATCATTACTGAGTTGAAAAACTCCAACCCCTGTGAACATAACCTCTGTCGTTGCTTCGGCGGGCACGCCCGCCGGAGGTTCAAAACTCTTATTTTTTCCAGTATCTCTGAGCCTGAAAGACAAATAATCAAAACTTTCAACAACGGATCTCTTGGTTCTGGCATCGATGAAGAACGCAGCGAAATGCGATAAGTAATGTGAATTGCAGAATTCAGTGAATCATCGAATCTTTGAACGCACATTGCGCCCGCCGGTATTCCGGCGGGCATGCCTGTTCGAGCGTCATTTCAACCCTCAAGCCTCGGCTTGGTGTTGGGGCGCCCGGGCCCTCCGCGGCCCGGGGCCCCCAAGTTCATCGGCGGGCTCGTCGGTACACTGAGCGCAGTAAAACGCGGTAA…	Eukaryota	Fungi	Ascomycota	Pezizomycotina	Sordariomycetes	Sordariomycetidae	NA	Magnaporthales	NA	NA	NA	Pyriculariaceae	Pyricularia	Pyricularia oryzae	India:Karnataka	14	75.6
NCBI	MT757308	NA	TAAAAGTCGTAACAAGGTTTCCGTAGGTGAACCTGCGGAAGGATCATTACCGAGTGTAGGGTTCCTAGCGAGCCCAACCTCCCACCCGTGTTTACTGTACCTTAGTTGCTTCGGCGGGCCCGCCATTCATGGCCGCCGGGGGCTCTCAGCCCCGGGCCCGCGCCCGCCGGAGACACCACGAACTCTGTCTGATCTAGTGAAGTCTGAGTTGATTGTATCGCAATCAGTTAAAACTTTCAACAATGGATCTCTTGGTTCCGGCATCGATGAAGAACGCAGCGAAATGCGATAACTAGTGTGAATTGCAGAATTCCGTGAATCATCGAGTCTTTGAACGCACATTGCGCCCCCTGGTATTCCGGGGGGCATGCCTGTCCGAGCGTCATTGCTGCCCATCAA…	Eukaryota	Fungi	Ascomycota	Pezizomycotina	Sordariomycetes	Sordariomycetidae	NA	Magnaporthales	NA	NA	NA	Pyriculariaceae	Pyricularia	Pyricularia oryzae	India:Karnataka	14.2	75
NCBI	MT757307	NA	TAAAAGTCGTAACAAGGTCTCCGTTGGTGAACCAGCGGAGGGATCATTACTGAGTTGAAAAACTCCAACCCCTGTGAACATAACCTCTGTCGTTGCTTCGGCGGGCACGCCCGCCGGAGGTTCAAAACTCTTATTTTTTCCAGTATCTCTGAGCCTGAAAGACAAATAATCAAAACTTTCAACAACGGATCTCTTGGTTCTGGCATCGATGAAGAACGCAGCGAAATGCGATAAGTAATGTGAATTGCAGAATTCAGTGAATCATCGAATCTTTGAACGCACATTGCGCCCGCCGGTATTCCGGCGGGCATGCCTGTTCGAGCGTCATTTCAACCCTCAAGCCTCGGCTTGGTGTTGGGGCGCCCGGGCCCTCCGCGGCCCGGGGCCCCCAAGTTCATC…	Eukaryota	Fungi	Ascomycota	Pezizomycotina	Sordariomycetes	Sordariomycetidae	NA	Magnaporthales	NA	NA	NA	Pyriculariaceae	Pyricularia	Pyricularia oryzae	India:Karnataka	14.2	74.9
NCBI	MT757306	NA	TAAAAGTCGTAACAAGGTCTCCGTTGGTGAACCAGCGGAGGGATCATTACTGAGTTGAAAAACTCCAACCCCTGTGAACATAACCTCTGTCGTTGCTTCGGCGGGCACGCCCGCCGGAGGTTCAAAACTCTTATTTTTTCCAGTATCTCTGAGCCTGAAAGACAAATAATCAAAACTTTCAACAACGGATCTCTTGGTTCTGGCATCGATGAAGAACGCAGCGAAATGCGATAAGTAATGTGAATTGCAGAATTCAGTGAATCATCGAATCTTTGAACGCACATTGCGCCCGCCGGTATTCCGGCGGGCATGCCTGTTCGAGCGTCATTTCAACCCTCAAGCCTCGGCTTGGTGTTGGGGCGCCCGGGCCCTCCGCGGCCCGGGGCCCCCAAGTTCATC…	Eukaryota	Fungi	Ascomycota	Pezizomycotina	Sordariomycetes	Sordariomycetidae	NA	Magnaporthales	NA	NA	NA	Pyriculariaceae	Pyricularia	Pyricularia oryzae	India:Karnataka	14.2	74.9
NCBI	MT757305	NA	TAAAAGTCGTAACAAGGTCTCCGTTGGTGAACCAGCGGAGGGATCATTACTGAGTTGAAAAACTCCAACCCCTGTGAACATAACCTCTGTCGTTGCTTCGGCGGGCACGCCCGCCGGAGGTTCAAAACTCTTATTTTTTCCAGTATCTCTGAGCCTGAAAGACAAATAATCAAAACTTTCAACAACGGATCTCTTGGTTCTGGCATCGATGAAGAACGCAGCGAAATGCGATAAGTAATGTGAATTGCAGAATTCAGTGAATCATCGAATCTTTGAACGCACATTGCGCCCGCCGGTATTCCGGCGGGCATGCCTGTTCGAGCGTCATTTCAACCCTCAAGCCTCGGCTTGGTGTTGGGGCGCCCGGGCCCTCCGCGGCCCGGGGCCCCCAAGTTCATC…	Eukaryota	Fungi	Ascomycota	Pezizomycotina	Sordariomycetes	Sordariomycetidae	NA	Magnaporthales	NA	NA	NA	Pyriculariaceae	Pyricularia	Pyricularia oryzae	India:Karnataka	13.8	75.7
NCBI	MT757304	NA	GGAAGTAAAAGTCGTAACAAGGTCTCCGTTGGTGAACCAGCGGAGGGATCATTACTGAGTTGAAAAACTCCAACCCCTGTGAACATAACCTCTGTCGTTGCTTCGGCGGGCACGCCCGCCGGAGGTTCAAAACTCTTATTTTTTCCAGTATCTCTGAGCCTGAAAGACAAATAATCAAAACTTTCAACAACGGATCTCTTGGTTCTGGCATCGATGAAGAACGCAGCGAAATGCGATAAGTAATGTGAATTGCAGAATTCAGTGAATCATCGAATCTTTGAACGCACATTGCGCCCGCCGGTATTCCGGCGGGCATGCCTGTTCGAGCGTCATTTCAACCCTCAAGCCTCGGCTTGGTGTTGGGGCGCCCGGGCCCTCCGCGGCCCGGGGCCCCCAAGT…	Eukaryota	Fungi	Ascomycota	Pezizomycotina	Sordariomycetes	Sordariomycetidae	NA	Magnaporthales	NA	NA	NA	Pyriculariaceae	Pyricularia	Pyricularia oryzae	India:Karnataka	15.7	76.7
NCBI	MT757303	NA	GGAGGGATCATTACTGAGTTGAAAAACTCCAACCCCTGTGAACATAACCTCTGTCGTTGCTTCGGCGGGCACGCCCGCCGGAGGTTCAAAACTCTTATTTTTTCCAGTATCTCTGAGCCTGAAAGACAAATAATCAAAACTTTCAACAACGGATCTCTTGGTTCTGGCATCGATGAAGAACGCAGCGAAATGCGATAAGTAATGTGAATTGCAGAATTCAGTGAATCATCGAATCTTTGAACGCACATTGCGCCCGCCGGTATTCCGGCGGGCATGCCTGTTCGAGCGTCATTTCAACCCTCAAGCCTCGGCTTGGTGTTGGGGCGCCCGGGCCCTCCGCGGCCCGGGGCCCCCAAGTTCATCGGCGGGCTCGTCGGTACACTGAGCGCAGTAAAACGC…	Eukaryota	Fungi	Ascomycota	Pezizomycotina	Sordariomycetes	Sordariomycetidae	NA	Magnaporthales	NA	NA	NA	Pyriculariaceae	Pyricularia	Pyricularia oryzae	India:Karnataka	15.9	76.8
NCBI	MT757302	NA	GAAGTAAAAGTCGTAACAAGGTATCTGTAGGTGAACCTGCAGATGGATCATTTCGATGAAAACCTTTTTTCTTGAGGTGTGGCTCGCACCTGTCTAACTAAATCGAGCTACCACATTTTAACACGGTTGCATCGGTTGGCTGTCAAACAGTGCGCGCGGCGAATTCATTTTCGCCCGCGCTCTGCGAGACGGTCGACACTTTACCAAAAACACTGTTGATACCATAGGATTTGAACGTAGATGAAACTCGACTGGTAATGCGGTCGTCTAAAATCTAAAAACAACTTTTGGCAACGGATCTCTTGGTTCTCCCATCGATGAAGAACGCAGCGAATTGCGATAAGTAATGTGAATTGCAGAAGTGAATCATCGAATCTTTGAACGCACCTTGCGCTCCCG…	Eukaryota	Fungi	Ascomycota	Pezizomycotina	Sordariomycetes	Sordariomycetidae	NA	Magnaporthales	NA	NA	NA	Pyriculariaceae	Pyricularia	Pyricularia oryzae	India:Karnataka	12.2	76.9
NCBI	MT757301	NA	AGGAAGTAAAAGTCGTAACAAGGTCTCCGTTGGTGAACCAGCGGAGGGATCATTACTGAGTTGAAAAACTCCAACCCCTGTGAACATAACCTCTGTCGTTGCTTCGGCGGGCACGCCCGCCGGAGGTTCAAAACTCTTATTTTTTCCAGTATCTCTGAGCCTGAAAGACAAATAATCAAAACTTTCAACAACGGATCTCTTGGTTCTGGCATCGATGAAGAACGCAGCGAAATGCGATAAGTAATGTGAATTGCAGAATTCAGTGAATCATCGAATCTTTGAACGCACATTGCGCCCGCCGGTATTCCGGCGGGCATGCCTGTTCGAGCGTCATTTCAACCCTCAAGCCTCGGCTTGGTGTTGGGGCGCCCGGGCCCTCCGCGGCCCGGGGCCCCCAAG…	Eukaryota	Fungi	Ascomycota	Pezizomycotina	Sordariomycetes	Sordariomycetidae	NA	Magnaporthales	NA	NA	NA	Pyriculariaceae	Pyricularia	Pyricularia oryzae	India:Karnataka	12.2	76.8
NCBI	MT757300	NA	TAAAAGTCGTAACAAGGTCTCCGTTGGTGAACCAGCGGAGGGATCATTATTGAGTTGAAAAACTCCAACCCCTGTGAACATAACCTCTGTCGTTGCTTCGGCGGGCACGCCCGCCGGAGGTTCAAAACTCTTATTTTTTCCAGTATCTCTGAGCCTGAAAGACAAATAATCAAAACTTTCAACAACGGATCTCTTGGTTCTGGCATCGATGAAGAACGCAGCGAAATGCGATAAGTAATGTGAATTGCAGAATTCAGTGAATCATCGAATCTTTGAACGCACATTGCGCCCGCCGGTATTCCGGCGGGCATGCCTGTTCGAGCGTCATTTCAACCCTCAAGCCTCGGCTTGGTGTTGGGGCGCCCGGGCCCTCCGCGGCCCGGGGCCCCCAAGTTCATC…	Eukaryota	Fungi	Ascomycota	Pezizomycotina	Sordariomycetes	Sordariomycetidae	NA	Magnaporthales	NA	NA	NA	Pyriculariaceae	Pyricularia	Pyricularia oryzae	India:Karnataka	12.2	76.9
NCBI	MT757299	NA	AAAAGTCGTAACAAGGTCTCCGTTGGTGAACCAGCGGAGGGATCATTACTGAGTTGAAAAACTCCAACCCCTGTGAACATAACCTCTGTCGTTGCTTCGGCGGGCACGCCCGCCGGAGGTTCAAAACTCTTATTTTTTCCAGTATCTCTGAGCCTGAAAGACAAATAATCAAAACTTTCAACAACGGATCTCTTGGTTCTGGCATCGATGAAGAACGCAGCGAAATGCGATAAGTAATGTGAATTGCAGAATTCAGTGAATCATCGAATCTTTGAACGCACATTGCGCCCGCCGGTATTCCGGCGGGCATGCCTGTTCGAGCGTCATTTCAACCCTCAAGCCTCGGCTTGGTGTTGGGGCGCCCGGGCCCTCCGCGGCCCGGGGCCCCCAAGTTCATCG…	Eukaryota	Fungi	Ascomycota	Pezizomycotina	Sordariomycetes	Sordariomycetidae	NA	Magnaporthales	NA	NA	NA	Pyriculariaceae	Pyricularia	Pyricularia oryzae	India:Karnataka	12.2	77
NCBI	MT757298	NA	AAAAGTCGTAACAAGGTCTCCGTTGGTGAACCAGCGGAGGGATCATTACTGAGTTGAAAAACTCCAACCCCTGTGAACATAACCTCTGTCGTTGCTTCGGCGGGCACGCCCGCCGGAGGTTCAAAACTCTTATTTTTTCCAGTATCTCTGAGCCTGAAAGACAAATAATCAAAACTTTCAACAACGGATCTCTTGGTTCTGGCATCGATGAAGAACGCAGCGAAATGCGATAAGTAATGTGAATTGCAGAATTCAGTGAATCATCGAATCTTTGAACGCACATTGCGCCCGCCGGTATTCCGGCGGGCATGCCTGTTCGAGCGTCATTTCAACCCTCAAGCCTCGGCTTGGTGTTGGGGCGCCCGGGCCCTCCGCGGCCCGGGGCCCCCAAGTTCATCG…	Eukaryota	Fungi	Ascomycota	Pezizomycotina	Sordariomycetes	Sordariomycetidae	NA	Magnaporthales	NA	NA	NA	Pyriculariaceae	Pyricularia	Pyricularia oryzae	India:Karnataka	12.5	76.2
NCBI	MT757297	NA	AAAAGTCGTAACAAGGTCTCCGTTGGTGAACCAGCGGAGGGATCATTACTGAGTTGAAAAACTCCAACCCCTGTGAACATAACCTCTGTCGTTGCTTCGGCGGGCACGCCCGCCGGAGGTTCAAAACTCTTATTTTTTCCAGTATCTCTGAGCCTGAAAGACAAATAATCAAAACTTTCAACAACGGATCTCTTGGTTCTGGCATCGATGAAGAACGCAGCGAAATGCGATAAGTAATGTGAATTGCAGAATTCAGTGAATCATCGAATCTTTGAACGCACATTGCGCCCGCCGGTATTCCGGCGGGCATGCCTGTTCGAGCGTCATTTCAACCCTCAAGCCTCGGCTTGGTGTTGGGGCGCCCGGGCCCTCCGCGGCCCGGGGCCCCCAAGTTCATCG…	Eukaryota	Fungi	Ascomycota	Pezizomycotina	Sordariomycetes	Sordariomycetidae	NA	Magnaporthales	NA	NA	NA	Pyriculariaceae	Pyricularia	Pyricularia oryzae	India:Karnataka	12.5	76.2
NCBI	MT757296	NA	AAAAGTCGTAACAAGGTCTCCGTTGGTGAACCAGCGGAGGGATCATTACTGAGTTGAAAAACTCCAACCCCTGTGAACATAACCTCTGTCGTTGCTTCGGCGGGCACGCCCGCCGGAGGTTCAAAACTCTTATTTTTTCCAGTATCTCTGAGCCTGAAAGACAAATAATCAAAACTTTCAACAACGGATCTCTTGGTTCTGGCATCGATGAAGAACGCAGCGAAATGCGATAAGTAATGTGAATTGCAGAATTCAGTGAATCATCGAATCTTTGAACGCACATTGCGCCCGCCGGTATTCCGGCGGGCATGCCTGTTCGAGCGTCATTTCAACCCTCAAGCCTCGGCTTGGTGTTGGGGCGCCCGGGCCCTCCGCGGCCCGGGGCCCCCAAGTTCATCG…	Eukaryota	Fungi	Ascomycota	Pezizomycotina	Sordariomycetes	Sordariomycetidae	NA	Magnaporthales	NA	NA	NA	Pyriculariaceae	Pyricularia	Pyricularia oryzae	India:Karnataka	12.6	76.2
NCBI	MT757295	NA	AAAGTCGTAACAAGGTCTCCGTTGGTGAACCAGCGGAGGGATCATTACAGAGTTATCCAACTCCCAAACCCAGTGTGAACTTATCTCTTTGTTGCCTCGGCGCAAGCTACCCGGGACCTCGCGCCCCGGGGGGCCCGCCGGCGGACAAACCAAACTCTGTTATCTTCGTTGATTATCTGAGTGTCTTATTTAATAAGTCAAAACTTTCAACAACGGATCTCTTGGTTCTGGCATCGATGAAGAACGCAGCGAAATGCGATAAGTAATGTGAATTGCAGAATTCAGTGAATCATCGAATCTTTGAACGCACATTGCGCCCATTAGTATTCTAGTGGGCATGCCTGTTCGAGCGTCATTTCAACCCCTAAGCACAGCTTATTGTTGGGACTCTACGGCTTC…	Eukaryota	Fungi	Ascomycota	Pezizomycotina	Sordariomycetes	Sordariomycetidae	NA	Magnaporthales	NA	NA	NA	Pyriculariaceae	Pyricularia	Pyricularia oryzae	India:Karnataka	12.6	76.2
NCBI	MT757294	NA	AAAAGTCGTAACAAGGTCTCCGTTGGTGAACCAGCGGAGGGATCATTACTGAGTTGAAAAACTCCAACCCCTGTGAACATAACCTCTGTCGTTGCTTCGGCGGGCACGCCCGCCGGAGGTTCAAAACTCTTATTTTTTCCAGTATCTCTGAGCCTGAAAGACAAATAATCAAAACTTTCAACAACGGATCTCTTGGTTCTGGCATCGATGAAGAACGCAGCGAAATGCGATAAGTAATGTGAATTGCAGAATTCAGTGAATCATCGAATCTTTGAACGCACATTGCGCCCGCCGGTATTCCGGCGGGCATGCCTGTTCGAGCGTCATTTCAACCCTCAAGCCTCGGCTTGGTGTTGGGGCGCCCGGGCCCTCCGCGGCCCGGGGCCCCCAAGTTCATCG…	Eukaryota	Fungi	Ascomycota	Pezizomycotina	Sordariomycetes	Sordariomycetidae	NA	Magnaporthales	NA	NA	NA	Pyriculariaceae	Pyricularia	Pyricularia oryzae	India:Karnataka	12.6	76.8
NCBI	MT757293	NA	GGATCATTACTGAGTTGAAAAACTCCAACCCCTGTGAACATAACCTCTGTCGTTGCTTCGGCGGGCACGCCCGCCGGAGGTTCAAAACTCTTATTTTTTCCAGTATCTCTGAGCCTGAAAGACAAATAATCAAAACTTTCAACAACGGATCTCTTGGTTCTGGCATCGATGAAGAACGCAGCGAAATGCGATAAGTAATGTGAATTGCAGAATTCAGTGAATCATCGAATCTTTGAACGCACATTGCGCCCGCCGGTATTCCGGCGGGCATGCCTGTTCGAGCGTCATTTCAACCCTCAAGCCTCGGCTTGGTGTTGGGGCGCCCGGGCCCTCCGCGGCCCGGGGCCCCCAAGTTCATCGGCGGGCTCGTCGGTACACTGAGCGCAGTAAAACGCGGTA…	Eukaryota	Fungi	Ascomycota	Pezizomycotina	Sordariomycetes	Sordariomycetidae	NA	Magnaporthales	NA	NA	NA	Pyriculariaceae	Pyricularia	Pyricularia oryzae	India:Karnataka	12.7	76.7
NCBI	MT757292	NA	GGATCATTACTGAGTTGAAAAACTCCAACCCCTGTGAACATAACCTCTGTCGTTGCTTCGGCGGGCACGCCCGCCGGAGGTTCAAAACTCTTATTTTTTCCAGTATCTCTGAGCCTGAAAGACAAATAATCAAAACTTTCAACAACGGATCTCTTGGTTCTGGCATCGATGAAGAACGCAGCGAAATGCGATAAGTAATGTGAATTGCAGAATTCAGTGAATCATCGAATCTTTGAACGCACATTGCGCCCGCCGGTATTCCGGCGGGCATGCCTGTTCGAGCGTCATTTCAACCCTCAAGCCTCGGCTTGGTGTTGGGGCGCCCGGGCCCTCCGCGGCCCGGGGCCCCCAAGTTCATCGGCGGGCTCGTCGGTACACTGAGCGCAGTAAAACGCGGTA…	Eukaryota	Fungi	Ascomycota	Pezizomycotina	Sordariomycetes	Sordariomycetidae	NA	Magnaporthales	NA	NA	NA	Pyriculariaceae	Pyricularia	Pyricularia oryzae	India:Karnataka	12.7	76.9
NCBI	MT757291	NA	GATCATTACTGAGTTGAAAAACTCCAACCCCTGTGAACATAACCTCTGTCGTTGCTTCGGCGGGCACGCCCGCCGGAGGTTCAAAACTCTTATTTTTTCCAGTATCTCTGAGCCTGAAAGACAAATAATCAAAACTTTCAACAACGGATCTCTTGGTTCTGGCATCGATGAAGAACGCAGCGAAATGCGATAAGTAATGTGAATTGCAGAATTCAGTGAATCATCGAATCTTTGAACGCACATTGCGCCCGCCGGTATTCCGGCGGGCATGCCTGTTCGAGCGTCATTTCAACCCTCAAGCCTCGGCTTGGTGTTGGGGCGCCCGGGCCCTCCGCGGCCCGGGGCCCCCAAGTTCATCGGCGGGCTCGTCGGTACACTGAGCGCAGTAAAACGCGGTAA…	Eukaryota	Fungi	Ascomycota	Pezizomycotina	Sordariomycetes	Sordariomycetidae	NA	Magnaporthales	NA	NA	NA	Pyriculariaceae	Pyricularia	Pyricularia oryzae	India:Karnataka	15.4	76.4
NCBI	MT757290	NA	GATCATTACTGAGTTGAAAAACTCCAACCCCTGTGAACATAACCTCTGTCGTTGCTTCGGCGGGCACGCCCGCCGGAGGTTCAAAACTCTTATTTTTTCCAGTATCTCTGAGCCTGAAAGACAAATAATCAAAACTTTCAACAACGGATCTCTTGGTTCTGGCATCGATGAAGAACGCAGCGAAATGCGATAAGTAATGTGAATTGCAGAATTCAGTGAATCATCGAATCTTTGAACGCACATTGCGCCCGCCGGTATTCCGGCGGGCATGCCTGTTCGAGCGTCATTTCAACCCTCAAGCCTCGGCTTGGTGTTGGGGCGCCCGGGCCCTCCGCGGCCCGGGGCCCCCAAGTTCATCGGCGGGCTCGTCGGTACACTGAGCGCAGTAAAACGCGGTAA…	Eukaryota	Fungi	Ascomycota	Pezizomycotina	Sordariomycetes	Sordariomycetidae	NA	Magnaporthales	NA	NA	NA	Pyriculariaceae	Pyricularia	Pyricularia oryzae	India:Karnataka	15.5	76.5
NCBI	MT757289	NA	GGAGGGATCATTACTGAGTTGAAAAACTCCAACCCCTGTGAACATAACCTCTGTCGTTGCTTCGGCGGGCACGCCCGCCGGAGGTTCAAAACTCTTATTTTTTCCAGTATCTCTGAGCCTGAAAGACAAATAATCAAAACTTTCAACAACGGATCTCTTGGTTCTGGCATCGATGAAGAACGCAGCGAAATGCGATAAGTAATGTGAATTGCAGAATTCAGTGAATCATCGAATCTTTGAACGCACATTGCGCCCGCCGGTATTCCGGCGGGCATGCCTGTTCGAGCGTCATTTCAACCCTCAAGCCTCGGCTTGGTGTTGGGGCGCCCGGGCCCTCCGCGGCCCGGGGCCCCCAAGTTCATCGGCGGGCTCGTCGGTACACTGAGCGCAGTAAAACGC…	Eukaryota	Fungi	Ascomycota	Pezizomycotina	Sordariomycetes	Sordariomycetidae	NA	Magnaporthales	NA	NA	NA	Pyriculariaceae	Pyricularia	Pyricularia oryzae	India:Karnataka	15.5	76.5
NCBI	MT757288	NA	GTTCAAAACTCTTATTTTTTCCAGTATCTCTGAGCCTGAAAGACAAATAATCAAAACTTTCAACAACGGATCTCTTGGTTCTGGCATCGATGAAGAACGCAGCGAAATGCGATAAGTAATGTGAATTGCAGAATTCAGTGAATCATCGAATCTTTGAACGCACATTGCGCCCGCCGGTATTCCGGCGGGCATGCCTGTTCGAGCGTCATTTCAACCCTCAAGCCTCGGCTTGGTGTTGGGGCGCCCGGGCCCTCCGCGGCCCGGGGCCCCCAAGTTCATCGGCGGGCTCGTCGGTACACTGAGCGCAGTAAAACGCGGTAAAACGCGAACCTCGTGCTACCCCGTAAAACAAACCCATTTCTAAGGTTGACCTCGGATCATGTAGGGATACCCGCTGAA…	Eukaryota	Fungi	Ascomycota	Pezizomycotina	Sordariomycetes	Sordariomycetidae	NA	Magnaporthales	NA	NA	NA	Pyriculariaceae	Pyricularia	Pyricularia oryzae	India:Karnataka	15.5	76.5
NCBI	MT757287	NA	GATCATTACTGAGTTGAAAAACTCCAACCCCTGTGAACATAACCTCTGTCGTTGCTTCGGCGGGCACGCCCGCCGGAGGTTCAAAACTCTTATTTTTTCCAGTATCTCTGAGCCTGAAAGACAAATAATCAAAACTTTCAACAACGGATCTCTTGGTTCTGGCATCGATGAAGAACGCAGCGAAATGCGATAAGTAATGTGAATTGCAGAATTCAGTGAATCATCGAATCTTTGAACGCACATTGCGCCCGCCGGTATTCCGGCGGGCATGCCTGTTCGAGCGTCATTTCAACCCTCAAGCCTCGGCTTGGTGTTGGGGCGCCCGGGCCCTCCGCGGCCCGGGGCCCCCAAGTTCATCGGCGGGCTCGTCGGTACACTGAGCGCAGTAAAACGCGGTAA…	Eukaryota	Fungi	Ascomycota	Pezizomycotina	Sordariomycetes	Sordariomycetidae	NA	Magnaporthales	NA	NA	NA	Pyriculariaceae	Pyricularia	Pyricularia oryzae	India:Karnataka	15.4	76.5
NCBI	MT757286	NA	GTTCAAAACTCTTATTTTTTCCAGTATCTCTGAGCCTGAAAGACAAATAATCAAAACTTTCAACAACGGATCTCTTGGTTCTGGCATCGATGAAGAACGCAGCGAAATGCGATAAGTAATGTGAATTGCAGAATTCAGTGAATCATCGAATCTTTGAACGCACATTGCGCCCGCCGGTATTCCGGCGGGCATGCCTGTTCGAGCGTCATTTCAACCCTCAAGCCTCGGCTTGGTGTTGGGGCGCCCGGGCCCTCCGCGGCCCGGGGCCCCCAAGTTCATCGGCGGGCTCGTCGGTACACTGAGCGCAGTAAAACGCGGTAAAACGCGAACCTCGTTCGGATCGTCCCGGCGTGCTCCAGCCGCTAAACCCCCAATTTTTTAAAGGTTGACCTCGGATCA…	Eukaryota	Fungi	Ascomycota	Pezizomycotina	Sordariomycetes	Sordariomycetidae	NA	Magnaporthales	NA	NA	NA	Pyriculariaceae	Pyricularia	Pyricularia oryzae	India:Karnataka	12.1	75.9
NCBI	MT757285	NA	CATTACTGAGTTGAAAAACTCCAACCCCTGTGAACATAACCTCTGTCGTTGCTTCGGCGGGCACGCCCGCCGGAGGTTCAAAACTCTTATTTTTTCCAGTATCTCTGAGCCTGAAAGACAAATAATCAAAACTTTCAACAACGGATCTCTTGGTTCTGGCATCGATGAAGAACGCAGCGAAATGCGATAAGTAATGTGAATTGCAGAATTCAGTGAATCATCGAATCTTTGAACGCACATTGCGCCCGCCGGTATTCCGGCGGGCATGCCTGTTCGAGCGTCATTTCAACCCTCAAGCCTCGGCTTGGTGTTGGGGCGCCCGGGCCCTCCGCGGCCCGGGGCCCCCAAGTTCATCGGCGGGCTCGTCGGTACACTGAGCGCAGTAAAACGCGGTAAAAC…	Eukaryota	Fungi	Ascomycota	Pezizomycotina	Sordariomycetes	Sordariomycetidae	NA	Magnaporthales	NA	NA	NA	Pyriculariaceae	Pyricularia	Pyricularia oryzae	India:Karnataka	12.6	76.1
NCBI	MT757284	NA	GGTTCAAAACTCTTATTTTTTTCAGTATCTCTGAGCCTAAAAGACAAATAATCAAAACTTTCAACAACGGATCTCTTGGTTCTGGCATCGATGAAGAACGCAGCGAAATGCGATAAGTAATGTGAATTGCAGAATTCAGTGAATCATCGAATCTTTGAACGCACATTGCGCCCGCCGGTATTCCGGCGGGCATGCCTGTTCGAGCGTCATTTCAACCCTCAAGCCTCGGCTTGGTGTTGGGGCGCCCGGGCCCTCCGCGGCCCGGGGCCCCCAAGTTCATCGGCGGGCTCGTCGGTACACTGAGCGCAGTAAAACGCGGTAAAACGCGAACCTCGTTCGGATCGTCCCGGCGTGCTCCAGCCGCTAAACCCCCAATTCTTTAAAGGTTGACCTCGGATC…	Eukaryota	Fungi	Ascomycota	Pezizomycotina	Sordariomycetes	Sordariomycetidae	NA	Magnaporthales	NA	NA	NA	Pyriculariaceae	Pyricularia	Pyricularia oryzae	India:Karnataka	12.6	76.1
NCBI	MT757283	NA	GATCATTACTGAGTTGAAAAACTCCAACCCCTGTGAACATAACCTCTGTCGTTGCTTCGGCGGGCACGCCCGCCGGAGGTTCAAAACTCTTATTTTTTCCAGTATCTCTGAGCCTGAAAGACAAATAATCAAAACTTTCAACAACGGATCTCTTGGTTCTGGCATCGATGAAGAACGCAGCGAAATGCGATAAGTAATGTGAATTGCAGAATTCAGTGAATCATCGAATCTTTGAACGCACATTGCGCCCGCCGGTATTCCGGCGGGCATGCCTGTTCGAGCGTCATTTCAACCCTCAAGCCTCGGCTTGGTGTTGGGGCGCCCGGGCCCTCCGCGGCCCGGGGCCCCCAAGTTCATCGGCGGGCTCGTCGGTACACTGAGCGCAGTAAAACGCGGTAA…	Eukaryota	Fungi	Ascomycota	Pezizomycotina	Sordariomycetes	Sordariomycetidae	NA	Magnaporthales	NA	NA	NA	Pyriculariaceae	Pyricularia	Pyricularia oryzae	India:Karnataka	12.6	76.1
NCBI	MT757282	NA	GTTCAAAACTCTTATTTTTTCCAGTATCTCTGAGCCTGAAAGACAAATAATCAAAACTTTCAACAACGGATCTCTTGGTTCTGGCATCGATGAAGAACGCAGCGAAATGCGATAAGTAATGTGAATTGCAGAATTCAGTGAATCATCGAATCTTTGAACGCACATTGCGCCCGCCGGTATTCCGGCGGGCATGCCTGTTCGAGCGTCATTTCAACCCTCAAGCCTCGGCTTGGTGTTGGGGCGCCCGGGCCCTCCGCGGCCCGGGGCCCCCAAGTTCATCGGCGGGCTCGTCGGTACACTGAGCGCAGTAAAACGCGGTAAAACGCGAACCTCGTTCGGATCGTCCCGGCGTGCTCCAACCGCTAAACCAACAATTTTTTAAAGGTTGACCTCGGATCA…	Eukaryota	Fungi	Ascomycota	Pezizomycotina	Sordariomycetes	Sordariomycetidae	NA	Magnaporthales	NA	NA	NA	Pyriculariaceae	Pyricularia	Pyricularia oryzae	India:Karnataka	12.6	76.1
NCBI	MT757281	NA	GGATCATTACTGAGTTGAAAAACTCCAACCCCTGTGAACATAACCTCTGTCGTTGCTTCGGCGGGCACGCCCGCCGGAGGTTCAAAACTCTTATTTTTTCCAGTATCTCTGAGCCTGAAAGACAAATAATCAAAACTTTCAACAACGGATCTCTTGGTTCTGGCATCGATGAAGAACGCAGCGAAATGCGATAAGTAATGTGAATTGCAGAATTCAGTGAATCATCGAATCTTTGAACGCACATTGCGCCCGCCGGTATTCCGGCGGGCATGCCTGTTCGAGCGTCATTTCAACCCTCAAGCCTCGGCTTGGTGTTGGGGCGCCCGGGCCCTCCGCGGCCCGGGGCCCCCAAGTTCATCGGCGGGCTCGTCGGTACACTGAGCGCAGTAAAACGCGGTA…	Eukaryota	Fungi	Ascomycota	Pezizomycotina	Sordariomycetes	Sordariomycetidae	NA	Magnaporthales	NA	NA	NA	Pyriculariaceae	Pyricularia	Pyricularia oryzae	India:Karnataka	14.3	75.9
NCBI	MT757280	NA	GTTCAAAACTCTTATTTTTTCCAGTATCTCTGAGCCTGAAAGACAAATAATCAAAACTTTCAACAACGGATCTCTTGGTTCTGGCATCGATGAAGAACGCAGCGAAATGCGATAAGTAATGTGAATTGCAGAATTCAGTGAATCATCGAATCTTTGAACGCACATTGCGCCCGCCGGTATTCCGGCGGGCATGCCTGTTCGAGCGTCATTTCAACCCTCAAGCCTCGGCTTGGTGTTGGGGCGCCCGGGCCCTCCGCGGCCCGGGGCCCCCAAGTTCATCGGCGGGCTCGTCGGTACACTGAGCGCAGTAAAACGCGGTAAAACGCGAACCTCGTTCGGATCGTCCCGGCGTGCTCCAGCCGCTAAACCCCCAATTTTTTAAAGGTTGACCTCGGATCA…	Eukaryota	Fungi	Ascomycota	Pezizomycotina	Sordariomycetes	Sordariomycetidae	NA	Magnaporthales	NA	NA	NA	Pyriculariaceae	Pyricularia	Pyricularia oryzae	India:Karnataka	14.3	75.9
NCBI	MT757279	NA	GTTCCAAACTCCAAGATTTCTAGTATCTCTGAGCCTAAAAGACAAAAATAATCAAAACTTTCAACAACGGATCTCTTGGTTCTGGCATCGATGAAGAACGCAGCGAAATGCGATAAGTAATGTGAATTGCAGAATTCAGTGAATCATCGAATCTTTGAACGCACATTGCGCCCGCCGGTATTCCGGCGGGCATGCCTGTTCGAGCGTCATTTCAACCCTCAAGCCTTCTCGGCTTGGTGTTGGGGCGCCCGGGTCCCCCGCGGCCCGGGGCCCCCAAGTTCATCGGCGGGCTCGTCGGTACACTGAGCGCATAAGAACGCGGTAAAACGCGAACCTCGTTCGGACCGTCCCGGCGCGCACCGGCCGCTAAACCCCCCCAAAAATTCAAAGGTTGACCTC…	Eukaryota	Fungi	Ascomycota	Pezizomycotina	Sordariomycetes	Sordariomycetidae	NA	Magnaporthales	NA	NA	NA	Pyriculariaceae	Pyricularia	Pyricularia oryzae	India:Karnataka	13.3	75.7
NCBI	MT757278	NA	GGATCATTACCGAGTTTACAACTCCCAAACCCCTGTGAACATACCTATACGTTGCCTCGGCGGATCAGCCCGCGCCCCGTAAAACGGGACGGCCCGCCCGAGGACCCTAAACTCTGTTTTTAGTGGAACTTCTGAGTAAAACAAACAAATAAATCAAAACTTTCAACAACGGATCTCTTGGTTCTGGCATCGATGAAGAACGCAGCAAAATGCGATAAGTAATGTGAATTGCAGAATTCAGTGAATCATCGAATCTTTGAACGCACATTGCGCCCGCCAGTATTCTGGCGGGCATGCCTGTTCGAGCGTCATTTCAACCCTCAAGCTCAGCTTGGTGTTGGGACTCGCGGTAACCCGCGTTCCCCAAATCGATTGGCGGTCACGTCGAGCTTCCATAGC…	Eukaryota	Fungi	Ascomycota	Pezizomycotina	Sordariomycetes	Sordariomycetidae	NA	Magnaporthales	NA	NA	NA	Pyriculariaceae	Pyricularia	Pyricularia oryzae	India:Karnataka	13.3	75.7
NCBI	MT757277	NA	GGATCATTACTGAGTTGAAAAACTCCAACCCCTGTGAACATAACCTCTGTCGTTGCTTCGGCGGGCACGCCCGCCGGAGGTTCAAAACTCTTATTTTTTCCAGTATCTCTGAGCCTGAAAGACAAATAATCAAAACTTTCAACAACGGATCTCTTGGTTCTGGCATCGATGAAGAACGCAGCGAAATGCGATAAGTAATGTGAATTGCAGAATTCAGTGAATCATCGAATCTTTGAACGCACATTGCGCCCGCCGGTATTCCGGCGGGCATGCCTGTTCGAGCGTCATTTCAACCCTCAAGCCTCGGCTTGGTGTTGGGGCGCCCGGGCCCTCCGCGGCCCGGGGCCCCCAAGTTCATCGGCGGGCTCGTCGGTACACTGAGCGCAGTAAAACGCGGTA…	Eukaryota	Fungi	Ascomycota	Pezizomycotina	Sordariomycetes	Sordariomycetidae	NA	Magnaporthales	NA	NA	NA	Pyriculariaceae	Pyricularia	Pyricularia oryzae	India:Karnataka	13.1	75.6
NCBI	MT757276	NA	GGATCATTACTGAGTTGAAAAACTCCAACCCCTGTGAACATAACCTCTGTCGTTGCTTCGGCGGGCACGCCCGCCGGAGGTTCAAAACTCTTATTTTTTCCAGTATCTCTGAGCCTGAAAGACAAATAATCAAAACTTTCAACAACGGATCTCTTGGTTCTGGCATCGATGAAGAACGCAGCGAAATGCGATAAGTAATGTGAATTGCAGAATTCAGTGAATCATCGAATCTTTGAACGCACATTGCGCCCGCCGGTATTCCGGCGGGCATGCCTGTTCGAGCGTCATTTCAACCCTCAAGCCTCGGCTTGGTGTTGGGGCGCCCGGGCCCTCCGCGGCCCGGGGCCCCCAAGTTCATCGGCGGGCTCGTCGGTACACTGAGCGCAGTAAAACGCGGTA…	Eukaryota	Fungi	Ascomycota	Pezizomycotina	Sordariomycetes	Sordariomycetidae	NA	Magnaporthales	NA	NA	NA	Pyriculariaceae	Pyricularia	Pyricularia oryzae	India:Karnataka	13.1	75.6
NCBI	MT757275	NA	GGATCATTACTGAGTTGAAAAACTCCAACCCCTGTGAACATAACCTCTGTCGTTGCTTCGGCGGGCACGCCCGCCGGAGGTTCAAAACTCTTATTTTTTCCAGTATCTCTGAGCCTGAAAGACAAATAATCAAAACTTTCAACAACGGATCTCTTGGTTCTGGCATCGATGAAGAACGCAGCGAAATGCGATAAGTAATGTGAATTGCAGAATTCAGTGAATCATCGAATCTTTGAACGCACATTGCGCCCGCCGGTATTCCGGCGGGCATGCCTGTTCGAGCGTCATTTCAACCCTCAAGCCTCGGCTTGGTGTTGGGGCGCCCGGGCCCTCCGCGGCCCGGGGCCCCCAAGTTCATCGGCGGGCTCGTCGGTACACTGAGCGCAGTAAAACGCGGTA…	Eukaryota	Fungi	Ascomycota	Pezizomycotina	Sordariomycetes	Sordariomycetidae	NA	Magnaporthales	NA	NA	NA	Pyriculariaceae	Pyricularia	Pyricularia oryzae	India:Karnataka	13.1	75.6
NCBI	OM899971	NA	CATTACTGAGTTGAAAACTCCAACCCCTGTGAACATAACCTCTGTCGTTGCTTCGGCGGGCACGCCCGCCGGAGGTTCAAAACTCTTATTTTTTCCAGTATCTCTGAGCCTGAAAGACAAATAATCAAAACTTTCAACAACGGATCTCTTGGTTCTGGCATCGATGAAGAACGCAGCGAAATGCGATAAGTAATGTGAATTGCAGAATTCAGTGAATCATCGAATCTTTGAACGCACATTGCGCCCGCCGGTATTCCGGCGGGCATGCCTGTTCGAGCGTCATTTCAACCCTCAAGCCTCGGCTTGGTGTTGG	Eukaryota	Fungi	Ascomycota	Pezizomycotina	Sordariomycetes	Sordariomycetidae	NA	Magnaporthales	NA	NA	NA	Pyriculariaceae	Pyricularia	Pyricularia oryzae	Kenya	-0.67	37.39
NCBI	OM899964	NA	TCTTGGTCATTTAGAGGAAGTAAAAGTCGTAACAAGGTCTCCGTTGGTGAACCAGCGGAGGGATCATTACTGAGTTGAAAAACTCCAACCCCTGTGAACATAACCTCTGTCGTTGCTTCGGCGGGCACGCCCGCCGGAGGTTCAAAACTCTTATTTTTTCCAGTATCTCTGAGCCTGAAAGACAAATAATCAAAACTTTCAACAACGGATCTCTTGGTTCTGGCATCGATGAAGAACGCAGCGAAATGCGATAAGTAATGTGAATTGCAGAATTCAGTGAATCATCGAATCTTTGAACGCACATTGCGCCCGCCGGTATTCCGGCGGGCATGCCTGTTCGAGCGTCATTTCAACCCTCAAGCCTCGGCTTGGTGTTGGGGCGCCCGGGCCCTCCGCGGC…	Eukaryota	Fungi	Ascomycota	Pezizomycotina	Sordariomycetes	Sordariomycetidae	NA	Magnaporthales	NA	NA	NA	Pyriculariaceae	Pyricularia	Pyricularia oryzae	Kenya	0.56	34.17
NCBI	OM899963	NA	ACCAGCGGAGGGATCATTACTGAGTTGAAAAACTCCAACCCCTGTGAACATAACCTCTGTCGTTGCTTCGGCGGGCACGCCCGCCGGAGGTTCAAAACTCTTATTTTTTCCAGTATCTCTGAGCCTGAAAGACAAATAATCAAAACTTTCAACAACGGATCTCTTGGTTCTGGCATCGATGAAGAACGCAGCGAAATGCGATAAGTAATGTGAATTGCAGAATTCAGTGAATCATCGAATCTTTGAACGCACATTGCGCCCGCCGGTATTCCGGCGGGCATGCCTGTTCGAGCGTCATTTCAACCCTCAAGCCTCGGCTTGGTGTTGGGGCGCCCGGGCCCTCCGCGGCCCGGGGCCCCCAAGTTCATCGGCGGGCTCGTCGGTACACTGAGCGCAGTA…	Eukaryota	Fungi	Ascomycota	Pezizomycotina	Sordariomycetes	Sordariomycetidae	NA	Magnaporthales	NA	NA	NA	Pyriculariaceae	Pyricularia	Pyricularia oryzae	Kenya	0.56	34.17
NCBI	OM899962	NA	TTGGTGAACCAGCGGAGGGATCATTACTGAGTTGAAAAACTCCAACCCCTGTGAACATAACCTCTGTCGTTGCTTCGGCGGGCACGCCCGCCGGAGGTTCAAAACTCTTATTTTTTCCAGTATCTCTGAGCCTGAAAGACAAATAATCAAAACTTTCAACAACGGATCTCTTGGTTCTGGCATCGATGAAGAACGCAGCGAAATGCGATAAGTAATGTGAATTGCAGAATTCAGTGAATCATCGAATCTTTGAACGCACATTGCGCCCGCCGGTATTCCGGCGGGCATGCCTGTTCGAGCGTCATTTCAACCCTCAAGCCTCGGCTTGGTGTTGGGGCGCCCGGGCCCTCCGCGGCCCGGGGCCCCCAAGTTCATCGGCGGGCTCGTCGGTACACTGAG…	Eukaryota	Fungi	Ascomycota	Pezizomycotina	Sordariomycetes	Sordariomycetidae	NA	Magnaporthales	NA	NA	NA	Pyriculariaceae	Pyricularia	Pyricularia oryzae	Kenya	0.56	34.17
NCBI	OM899870	NA	GAAGTAAAAGTCGTAACAAGGTCTCCGTTGGTGAACCAGCGGAGGGATCATTACTGAGTTGAAAAACTCCAACCCCTGTGAACATAACCTCTGTCGTTGCTTCGGCGGGCACGCCCGCCGGAGGTTCAAAACTCTTATTTTTTCCAGTATCTCTGAGCCTGAAAGACAAATAATCAAAACTTTCAACAACGGATCTCTTGGTTCTGGCATCGATGAAGAACGCAGCGAAATGCGATAAGTAATGTGAATTGCAGAATTCAGTGAATCATCGAATCTTTGAACGCACATTGCGCCCGCCGGTATTCCGGCGGGCATGCCTGTTCGAGCGTCATTTCAACCCTCAAGCCTCGGCTTGGTGTTGGGGCGCCCGGGCCCTCCGCGGCCCGGGGCCCCCAAGTT…	Eukaryota	Fungi	Ascomycota	Pezizomycotina	Sordariomycetes	Sordariomycetidae	NA	Magnaporthales	NA	NA	NA	Pyriculariaceae	Pyricularia	Pyricularia oryzae	Kenya	-0.68	37.38
NCBI	MN202974	NA	AGGGATCATTACTGAGTTGAAAAACTCCAACCCCTGTGAACATAACCTCCTGTCGTTGCTTCGGCGGGCACGCCCGCCGGAGGTTCAAAACTCTTATTTTTTTCAGTATCTCTGAGCCTAAAAGACAAATAATCAAAACTTTCAACAACGGATCTCTTGGTTCTGGCATCGATGAAGAACGCAGCGAAATGCGATAAGTAATGTGAATTGCAGAATTCAGTGAATCATCGAATCTTTGAACGCACATTGCGCCCGCCGGTATTCCGGCGGGCATGCCTGTTCGAGCGTCATTTCAACCCTCAAGCCTCGGCTTGGTGTTGGGGCGCCCGGGCCCTCCGCGGCCCGGGGCCCCCAAGTTCATCGGCGGGCTCGTCGGTTCACTGAGCGCAGTAAAACGCG…	Eukaryota	Fungi	Ascomycota	Pezizomycotina	Sordariomycetes	Sordariomycetidae	NA	Magnaporthales	NA	NA	NA	Pyriculariaceae	Pyricularia	Pyricularia oryzae	Kenya	0	37.9
NCBI	MN202973	NA	AGGGATCATTACTGAGTTGAAAAACTCCAACCCCTGTGAACATAACCTCCTGTCGTTGCTTCGGCGGGCACGCCCGCCGGAGGTTCAAAACTCTTATTTTTTTCAGTATCTCTGAGCCTAAAAGACAAATAATCAAAACTTTCAACAACGGATCTCTTGGTTCTGGCATCGATGAAGAACGCAGCGAAATGCGATAAGTAATGTGAATTGCAGAATTCAGTGAATCATCGAATCTTTGAACGCACATTGCGCCCGCCGGTATTCCGGCGGGCATGCCTGTTCGAGCGTCATTTCAACCCTCAAGCCTCGGCTTGGTGTTGGGGCGCCCGGGCCCTCCGCGGCCCGGGGCCCCCAAGTTCATCGGCGGGCTCGTCGGTTCACTGAGCGCAGTAAAACGCG…	Eukaryota	Fungi	Ascomycota	Pezizomycotina	Sordariomycetes	Sordariomycetidae	NA	Magnaporthales	NA	NA	NA	Pyriculariaceae	Pyricularia	Pyricularia oryzae	Kenya	0	37.9
NCBI	MN202972	NA	AGGGATCATTACTGAGTTGAAAAACTCCAACCCCTGTGAACATAACCTCCTGTCGTTGCTTCGGCGGGCACGCCCGCCGGAGGTTCAAAACTCTTATTTTTTTCAGTATCTCTGAGCCTAAAAGACAAATAATCAAAACTTTCAACAACGGATCTCTTGGTTCTGGCATCGATGAAGAACGCAGCGAAATGCGATAAGTAATGTGAATTGCAGAATTCAGTGAATCATCGAATCTTTGAACGCACATTGCGCCCGCCGGTATTCCGGCGGGCATGCCTGTTCGAGCGTCATTTCAACCCTCAAGCCTCGGCTTGGTGTTGGGGCGCCCGGGCCCTCCGCGGCCCGGGGCCCCCAAGTTCATCGGCGGGCTCGTCGGTTCACTGAGCGCAGTAAAACGCG…	Eukaryota	Fungi	Ascomycota	Pezizomycotina	Sordariomycetes	Sordariomycetidae	NA	Magnaporthales	NA	NA	NA	Pyriculariaceae	Pyricularia	Pyricularia oryzae	Kenya	0	37.9
NCBI	MN202971	NA	AGGGATCATTACTGAGTTGAAAAACTCCAACCCCTGTGAACATAACCTCCTGTCGTTGCTTCGGCGGGCACGCCCGCCGGAGGTTCAAAACTCTTATTTTTTTCAGTATCTCTGAGCCTAAAAGACAAATAATCAAAACTTTCAACAACGGATCTCTTGGTTCTGGCATCGATGAAGAACGCAGCGAAATGCGATAAGTAATGTGAATTGCAGAATTCAGTGAATCATCGAATCTTTGAACGCACATTGCGCCCGCCGGTATTCCGGCGGGCATGCCTGTTCGAGCGTCATTTCAACCCTCAAGCCTCGGCTTGGTGTTGGGGCGCCCGGGCCCTCCGCGGCCCGGGGCCCCCAAGTTCATCGGCGGGCTCGTCGGTTCACTGAGCGCAGTAAAACGCG…	Eukaryota	Fungi	Ascomycota	Pezizomycotina	Sordariomycetes	Sordariomycetidae	NA	Magnaporthales	NA	NA	NA	Pyriculariaceae	Pyricularia	Pyricularia oryzae	Kenya	0	37.9
NCBI	MN202970	NA	AGGGATCATTACTGAGTTGAAAAACTCCAACCCCTGTGAACATAACCTCCTGTCGTTGCTTCGGCGGGCACGCCCGCCGGAGGTTCAAAACTCTTATTTTTTTCAGTATCTCTGAGCCTAAAAGACAAATAATCAAAACTTTCAACAACGGATCTCTTGGTTCTGGCATCGATGAAGAACGCAGCGAAATGCGATAAGTAATGTGAATTGCAGAATTCAGTGAATCATCGAATCTTTGAACGCACATTGCGCCCGCCGGTATTCCGGCGGGCATGCCTGTTCGAGCGTCATTTCAACCCTCAAGCCTCGGCTTGGTGTTGGGGCGCCCGGGCCCTCCGCGGCCCGGGGCCCCCAAGTTCATCGGCGGGCTCGTCGGTTCACTGAGCGCAGTAAAACGCG…	Eukaryota	Fungi	Ascomycota	Pezizomycotina	Sordariomycetes	Sordariomycetidae	NA	Magnaporthales	NA	NA	NA	Pyriculariaceae	Pyricularia	Pyricularia oryzae	Kenya	0	37.9
NCBI	MN202969	NA	AGGGATCATTACTGAGTTGAAAAACTCCAACCCCTGTGAACATAACCTCCTGTCGTTGCTTCGGCGGGCTCGCCCGCCGGAGGTTACAAACTCTTGTGTATTTTTTTAGCATCTCTGAGCCTAAAAGACAAATAATCAAAACTTTCAACAACGGATCTCTTGGTTCTGGCATCGATGAAGAACGCAGCGAAATGCGATAAGTAATGTGAATTGCAGAATTCAGTGAATCATCGAATCTTTGAACGCACATTGCGCCCGCCGGTATTCCGGCGGGCATGCCTGTTCGAGCGTCATTTCAACCCTCAAGCCCCGGCTTGGTGTTGGGGCGCCCGGGTCCCCCGCGGCCCGGGGCCCCCAAGTTCATCGGCGGGCTCGTCGGTACACTGAGCGCAGTAAAAC…	Eukaryota	Fungi	Ascomycota	Pezizomycotina	Sordariomycetes	Sordariomycetidae	NA	Magnaporthales	NA	NA	NA	Pyriculariaceae	Pyricularia	Pyricularia oryzae	Kenya	0	37.9
NCBI	MN202968	NA	AGGGATCATTACTGAGTTGAAAAACTCCAACCCCTGTGAACATAACCTCCTGTCGTTGCTTCGGCGGGCACGCCCGCCGGAGGTTCAAAACTCTTATTTTTTTCAGTATCTCTGAGCCTAAAAGACAAATAATCAAAACTTTCAACAACGGATCTCTTGGTTCTGGCATCGATGAAGAACGCAGCGAAATGCGATAAGTAATGTGAATTGCAGAATTCAGTGAATCATCGAATCTTTGAACGCACATTGCGCCCGCCGGTATTCCGGCGGGCATGCCTGTTCGAGCGTCATTTCAACCCTCAAGCCTCGGCTTGGTGTTGGGGCGCCCGGGCCCTCCGCGGCCCGGGGCCCCCAAGTTCATCGGCGGGCTCGTCGGTTCACTGAGCGCAGTAAAACGCG…	Eukaryota	Fungi	Ascomycota	Pezizomycotina	Sordariomycetes	Sordariomycetidae	NA	Magnaporthales	NA	NA	NA	Pyriculariaceae	Pyricularia	Pyricularia oryzae	Kenya	0	37.9
NCBI	MN202967	NA	AGGGATCATTACTGAGTTGAAAAACTCCAACCCCTGTGAACATAACCTCCTGTCGTTGCTTCGGCGGGCACGCCCGCCGGAGGTTCAAAACTCTTATTTTTTTCAGTATCTCTGAGCCTAAAAGACAAATAATCAAAACTTTCAACAACGGATCTCTTGGTTCTGGCATCGATGAAGAACGCAGCGAAATGCGATAAGTAATGTGAATTGCAGAATTCAGTGAATCATCGAATCTTTGAACGCACATTGCGCCCGCCGGTATTCCGGCGGGCATGCCTGTTCGAGCGTCATTTCAACCCTCAAGCCTCGGCTTGGTGTTGGGGCGCCCGGGCCCTCCGCGGCCCGGGGCCCCCAAGTTCATCGGCGGGCTCGTCGGTTCACTGAGCGCAGTAAAACGCG…	Eukaryota	Fungi	Ascomycota	Pezizomycotina	Sordariomycetes	Sordariomycetidae	NA	Magnaporthales	NA	NA	NA	Pyriculariaceae	Pyricularia	Pyricularia oryzae	Kenya	0	37.9
NCBI	MN202966	NA	AGGGATCATTACTGAGTTGAAAAACTCCAACCCCTGTGAACATAACCTCCTGTCGTTGCTTCGGCGGGCACGCCCGCCGGAGGTTCAAAACTCTTATTTTTTTCAGTATCTCTGAGCCTAAAAGACAAATAATCAAAACTTTCAACAACGGATCTCTTGGTTCTGGCATCGATGAAGAACGCAGCGAAATGCGATAAGTAATGTGAATTGCAGAATTCAGTGAATCATCGAATCTTTGAACGCACATTGCGCCCGCCGGTATTCCGGCGGGCATGCCTGTTCGAGCGTCATTTCAACCCTCAAGCCTCGGCTTGGTGTTGGGGCGCCCGGGCCCTCCGCGGCCCGGGGCCCCCAAGTTCATCGGCGGGCTCGTCGGTTCACTGAGCGCAGTAAAACGCG…	Eukaryota	Fungi	Ascomycota	Pezizomycotina	Sordariomycetes	Sordariomycetidae	NA	Magnaporthales	NA	NA	NA	Pyriculariaceae	Pyricularia	Pyricularia oryzae	Kenya	0	37.9
NCBI	MN202965	NA	AGGGATCATTACTGAGTTGAAAAACTCCAACCCCTGTGAACATAACCTCCTGTCGTTGCTTCGGCGGGCACGCCCGCCGGAGGTTCAAAACTCTTATTTTTTTCAGTATCTCTGAGCCTAAAAGACAAATAATCAAAACTTTCAACAACGGATCTCTTGGTTCTGGCATCGATGAAGAACGCAGCGAAATGCGATAAGTAATGTGAATTGCAGAATTCAGTGAATCATCGAATCTTTGAACGCACATTGCGCCCGCCGGTATTCCGGCGGGCATGCCTGTTCGAGCGTCATTTCAACCCTCAAGCCTCGGCTTGGTGTTGGGGCGCCCGGGCCCTCCGCGGCCCGGGGCCCCCAAGTTCATCGGCGGGCTCGTCGGTTCACTGAGCGCAGTAAAACGCG…	Eukaryota	Fungi	Ascomycota	Pezizomycotina	Sordariomycetes	Sordariomycetidae	NA	Magnaporthales	NA	NA	NA	Pyriculariaceae	Pyricularia	Pyricularia oryzae	Kenya	0	37.9
NCBI	MN202964	NA	AGGGATCATTACTGAGTTGAAAAACTCCAACCCCTGTGAACATAACCTCCTGTCGTTGCTTCGGCGGGCACGCCCGCCGGAGGTTCAAAACTCTTATTTTTTTCAGTATCTCTGAGCCTAAAAGACAAATAATCAAAACTTTCAACAACGGATCTCTTGGTTCTGGCATCGATGAAGAACGCAGCGAAATGCGATAAGTAATGTGAATTGCAGAATTCAGTGAATCATCGAATCTTTGAACGCACATTGCGCCCGCCGGTATTCCGGCGGGCATGCCTGTTCGAGCGTCATTTCAACCCTCAAGCCTCGGCTTGGTGTTGGGGCGCCCGGGCCCTCCGCGGCCCGGGGCCCCCAAGTTCATCGGCGGGCTCGTCGGTTCACTGAGCGCAGTAAAACGCG…	Eukaryota	Fungi	Ascomycota	Pezizomycotina	Sordariomycetes	Sordariomycetidae	NA	Magnaporthales	NA	NA	NA	Pyriculariaceae	Pyricularia	Pyricularia oryzae	Kenya	0	37.9
NCBI	MN202963	NA	AGGGATCATTACTGAGTTGAAAAACTCCAACCCCTGTGAACATAACCTCCTGTCGTTGCTTCGGCGGGCACGCCCGCCGGAGGTTCAAAACTCTTATTTTTTTCAGTATCTCTGAGCCTAAAAGACAAATAATCAAAACTTTCAACAACGGATCTCTTGGTTCTGGCATCGATGAAGAACGCAGCGAAATGCGATAAGTAATGTGAATTGCAGAATTCAGTGAATCATCGAATCTTTGAACGCACATTGCGCCCGCCGGTATTCCGGCGGGCATGCCTGTTCGAGCGTCATTTCAACCCTCAAGCCTCGGCTTGGTGTTGGGGCGCCCGGGCCCTCCGCGGCCCGGGGCCCCCAAGTTCATCGGCGGGCTCGTCGGTTCACTGAGCGCAGTAAAACGCG…	Eukaryota	Fungi	Ascomycota	Pezizomycotina	Sordariomycetes	Sordariomycetidae	NA	Magnaporthales	NA	NA	NA	Pyriculariaceae	Pyricularia	Pyricularia oryzae	Kenya	0	37.9
NCBI	MN202962	NA	AGGGATCATTACTGAGTTGAAAAACTCCAACCCCTGTGAACATAACCTCCTGTCGTTGCTTCGGCGGGCACGCCCGCCGGAGGTTCAAAACTCTTATTTTTTTCAGTATCTCTGAGCCTAAAAGACAAATAATCAAAACTTTCAACAACGGATCTCTTGGTTCTGGCATCGATGAAGAACGCAGCGAAATGCGATAAGTAATGTGAATTGCAGAATTCAGTGAATCATCGAATCTTTGAACGCACATTGCGCCCGCCGGTATTCCGGCGGGCATGCCTGTTCGAGCGTCATTTCAACCCTCAAGCCTCGGCTTGGTGTTGGGGCGCCCGGGCCCTCCGCGGCCCGGGGCCCCCAAGTTCATCGGCGGGCTCGTCGGTACACTGAGCGCAGTAAAACGCG…	Eukaryota	Fungi	Ascomycota	Pezizomycotina	Sordariomycetes	Sordariomycetidae	NA	Magnaporthales	NA	NA	NA	Pyriculariaceae	Pyricularia	Pyricularia oryzae	Kenya	0	37.9
NCBI	MN202961	NA	AGGGATCATTACTGAGTTGAAAAACTCCAACCCCTGTGAACATAACCTCCTGTCGTTGCTTCGGCGGGCACGCCCGCCGGAGGTTCAAAACTCTTATTTTTTTCAGTATCTCTGAGCCTAAAAGACAAATAATCAAAACTTTCAACAACGGATCTCTTGGTTCTGGCATCGATGAAGAACGCAGCGAAATGCGATAAGTAATGTGAATTGCAGAATTCAGTGAATCATCGAATCTTTGAACGCACATTGCGCCCGCCGGTATTCCGGCGGGCATGCCTGTTCGAGCGTCATTTCAACCCTCAAGCCTCGGCTTGGTGTTGGGGCGCCCGGGCCCTCCGCGGCCCGGGGCCCCCAAGTTCATCGGCGGGCTCGTCGGTTCACTGAGCGCAGTAAAACGCG…	Eukaryota	Fungi	Ascomycota	Pezizomycotina	Sordariomycetes	Sordariomycetidae	NA	Magnaporthales	NA	NA	NA	Pyriculariaceae	Pyricularia	Pyricularia oryzae	Kenya	0	37.9
NCBI	MN202960	NA	AGGGATCATTACTGAGTTGAAAAACTCCAACCCCTGTGAACATAACCTCCTGTCGTTGCTTCGGCGGGCACGCCCGCCGGAGGTTCAAAACTCTTATTTTTTTCAGTATCTCTGAGCCTAAAAGACAAATAATCAAAACTTTCAACAACGGATCTCTTGGTTCTGGCATCGATGAAGAACGCAGCGAAATGCGATAAGTAATGTGAATTGCAGAATTCAGTGAATCATCGAATCTTTGAACGCACATTGCGCCCGCCGGTATTCCGGCGGGCATGCCTGTTCGAGCGTCATTTCAACCCTCAAGCCTCGGCTTGGTGTTGGGGCGCCCGGGCCCTCCGCGGCCCGGGGCCCCCAAGTTCATCGGCGGGCTCGTCGGTTCACTGAGCGCAGTAAAACGCG…	Eukaryota	Fungi	Ascomycota	Pezizomycotina	Sordariomycetes	Sordariomycetidae	NA	Magnaporthales	NA	NA	NA	Pyriculariaceae	Pyricularia	Pyricularia oryzae	Kenya	0	37.9
NCBI	MN202959	NA	AGGGATCATTACTGAGTTGAAAAACTCCAACCCCTGTGAACATAACCTCCTGTCGTTGCTTCGGCGGGCACGCCCGCCGGAGGTTCAAAACTCTTATTTTTTTCAGTATCTCTGAGCCTAAAAGACAAATAATCAAAACTTTCAACAACGGATCTCTTGGTTCTGGCATCGATGAAGAACGCAGCGAAATGCGATAAGTAATGTGAATTGCAGAATTCAGTGAATCATCGAATCTTTGAACGCACATTGCGCCCGCCGGTATTCCGGCGGGCATGCCTGTTCGAGCGTCATTTCAACCCTCAAGCCTCGGCTTGGTGTTGGGGCGCCCGGGCCCTCCGCGGCCCGGGGCCCCCAAGTTCATCGGCGGGCTCGTCGGTTCACTGAGCGCAGTAAAACGCG…	Eukaryota	Fungi	Ascomycota	Pezizomycotina	Sordariomycetes	Sordariomycetidae	NA	Magnaporthales	NA	NA	NA	Pyriculariaceae	Pyricularia	Pyricularia oryzae	Kenya	0	37.9
NCBI	MN202958	NA	AGGGATCATTACTGAGTTGAAAAACTCCAACCCCTGTGAACATAACCTCCTGTCGTTGCTTCGGCGGGCACGCCCGCCGGAGGTTCAAAACTCTTATTTTTTTCAGTATCTCTGAGCCTAAAAGACAAATAATCAAAACTTTCAACAACGGATCTCTTGGTTCTGGCATCGATGAAGAACGCAGCGAAATGCGATAAGTAATGTGAATTGCAGAATTCAGTGAATCATCGAATCTTTGAACGCACATTGCGCCCGCCGGTATTCCGGCGGGCATGCCTGTTCGAGCGTCATTTCAACCCTCAAGCCTCGGCTTGGTGTTGGGGCGCCCGGGCCCTCCGCGGCCCGGGGCCCCCAAGTTCATCGGCGGGCTCGTCGGTTCACTGAGCGCAGTAAAACGCG…	Eukaryota	Fungi	Ascomycota	Pezizomycotina	Sordariomycetes	Sordariomycetidae	NA	Magnaporthales	NA	NA	NA	Pyriculariaceae	Pyricularia	Pyricularia oryzae	Kenya	0	37.9
NCBI	MN202957	NA	AGGGATCATTACTGAGTTGAAAAACTCCAACCCCTGTGAACATAACCTCCTGTCGTTGCTTCGGCGGGCACGCCCGCCGGAGGTTCAAAACTCTTATTTTTTTCAGTATCTCTGAGCCTAAAAGACAAATAATCAAAACTTTCAACAACGGATCTCTTGGTTCTGGCATCGATGAAGAACGCAGCGAAATGCGATAAGTAATGTGAATTGCAGAATTCAGTGAATCATCGAATCTTTGAACGCACATTGCGCCCGCCGGTATTCCGGCGGGCATGCCTGTTCGAGCGTCATTTCAACCCTCAAGCCTCGGCTTGGTGTTGGGGCGCCCGGGCCCTCCGCGGCCCGGGGCCCCCAAGTTCATCGGCGGGCTCGTCGGTTCACTGAGCGCAGTAAAACGCG…	Eukaryota	Fungi	Ascomycota	Pezizomycotina	Sordariomycetes	Sordariomycetidae	NA	Magnaporthales	NA	NA	NA	Pyriculariaceae	Pyricularia	Pyricularia oryzae	Kenya	0	37.9
NCBI	MN202956	NA	AGGGATCATTACTGAGTTGAAAAACTCCAACCCCTGTGAACATAACCTCCTGTCGTTGCTTCGGCGGGCACGCCCGCCGGAGGTTCAAAACTCTTATTTTTTTCAGTATCTCTGAGCCTAAAAGACAAATAATCAAAACTTTCAACAACGGATCTCTTGGTTCTGGCATCGATGAAGAACGCAGCGAAATGCGATAAGTAATGTGAATTGCAGAATTCAGTGAATCATCGAATCTTTGAACGCACATTGCGCCCGCCGGTATTCCGGCGGGCATGCCTGTTCGAGCGTCATTTCAACCCTCAAGCCTCGGCTTGGTGTTGGGGCGCCCGGGCCCTCCGCGGCCCGGGGCCCCCAAGTTCATCGGCGGGCTCGTCGGTTCACTGAGCGCAGTAAAACGCG…	Eukaryota	Fungi	Ascomycota	Pezizomycotina	Sordariomycetes	Sordariomycetidae	NA	Magnaporthales	NA	NA	NA	Pyriculariaceae	Pyricularia	Pyricularia oryzae	Kenya	0	37.9
NCBI	MN202955	NA	AGGGATCATTACTGAGTTGAAAAACTCCAACCCCTGTGAACATAACCTCCTGTCGTTGCTTCGGCGGGCACGCCCGCCGGAGGTTCAAAACTCTTATTTTTTTCAGTATCTCTGAGCCTAAAAGACAAATAATCAAAACTTTCAACAACGGATCTCTTGGTTCTGGCATCGATGAAGAACGCAGCGAAATGCGATAAGTAATGTGAATTGCAGAATTCAGTGAATCATCGAATCTTTGAACGCACATTGCGCCCGCCGGTATTCCGGCGGGCATGCCTGTTCGAGCGTCATTTCAACCCTCAAGCCTCGGCTTGGTGTTGGGGCGCCCGGGCCCTCCGCGGCCCGGGGCCCCCAAGTTCATCGGCGGGCTCGTCGGTTCACTGAGCGCAGTAAAACGCG…	Eukaryota	Fungi	Ascomycota	Pezizomycotina	Sordariomycetes	Sordariomycetidae	NA	Magnaporthales	NA	NA	NA	Pyriculariaceae	Pyricularia	Pyricularia oryzae	Kenya	0	37.9
NCBI	MN202954	NA	AGGGATCATTACTGAGTTGAAAAACTCCAACCCCTGTGAACATAACCTCCTGTCGTTGCTTCGGCGGGCACGCCCGCCGGAGGTTCAAAACTCTTATTTTTTTCAGTATCTCTGAGCCTAAAAGACAAATAATCAAAACTTTCAACAACGGATCTCTTGGTTCTGGCATCGATGAAGAACGCAGCGAAATGCGATAAGTAATGTGAATTGCAGAATTCAGTGAATCATCGAATCTTTGAACGCACATTGCGCCCGCCGGTATTCCGGCGGGCATGCCTGTTCGAGCGTCATTTCAACCCTCAAGCCTCGGCTTGGTGTTGGGGCGCCCGGGCCCTCCGCGGCCCGGGGCCCCCAAGTTCATCGGCGGGCTCGTCGGTTCACTGAGCGCAGTAAAACGCG…	Eukaryota	Fungi	Ascomycota	Pezizomycotina	Sordariomycetes	Sordariomycetidae	NA	Magnaporthales	NA	NA	NA	Pyriculariaceae	Pyricularia	Pyricularia oryzae	Kenya	0	37.9
NCBI	MN202953	NA	AGGGATCATTACTGAGTTGAAAAACTCCAACCCCTGTGAACATAACCTCCTGTCGTTGCTTCGGCGGGCACGCCCGCCGGAGGTTCAAAACTCTTATTTTTTTCAGTATCTCTGAGCCTAAAAGACAAATAATCAAAACTTTCAACAACGGATCTCTTGGTTCTGGCATCGATGAAGAACGCAGCGAAATGCGATAAGTAATGTGAATTGCAGAATTCAGTGAATCATCGAATCTTTGAACGCACATTGCGCCCGCCGGTATTCCGGCGGGCATGCCTGTTCGAGCGTCATTTCAACCCTCAAGCCTCGGCTTGGTGTTGGGGCGCCCGGGCCCTCCGCGGCCCGGGGCCCCCAAGTTCATCGGCGGGCTCGTCGGTTCACTGAGCGCAGTAAAACGCG…	Eukaryota	Fungi	Ascomycota	Pezizomycotina	Sordariomycetes	Sordariomycetidae	NA	Magnaporthales	NA	NA	NA	Pyriculariaceae	Pyricularia	Pyricularia oryzae	Kenya	0	37.9
NCBI	MN202952	NA	AGGGATCATTACTGAGTTGAAAAACTCCAACCCCTGTGAACATAACCTCCTGTCGTTGCTTCGGCGGGCACGCCCGCCGGAGGTTCAAAACTCTTATTTTTTTCAGTATCTCTGAGCCTAAAAGACAAATAATCAAAACTTTCAACAACGGATCTCTTGGTTCTGGCATCGATGAAGAACGCAGCGAAATGCGATAAGTAATGTGAATTGCAGAATTCAGTGAATCATCGAATCTTTGAACGCACATTGCGCCCGCCGGTATTCCGGCGGGCATGCCTGTTCGAGCGTCATTTCAACCCTCAAGCCTCGGCTTGGTGTTGGGGCGCCCGGGCCCTCCGCGGCCCGGGGCCCCCAAGTTCATCGGCGGGCTCGTCGGTTCACTGAGCGCAGTAAAACGCG…	Eukaryota	Fungi	Ascomycota	Pezizomycotina	Sordariomycetes	Sordariomycetidae	NA	Magnaporthales	NA	NA	NA	Pyriculariaceae	Pyricularia	Pyricularia oryzae	Kenya	0	37.9
NCBI	MN202951	NA	AGGGATCATTACTGAGTTGAAAAACTCCAACCCCTGTGAACATAACCTCCTGTCGTTGCTTCGGCGGGCACGCCCGCCGGAGGTTCAAAACTCTTATTTTTTTCAGTATCTCTGAGCCTAAAAGACAAATAATCAAAACTTTCAACAACGGATCTCTTGGTTCTGGCATCGATGAAGAACGCAGCGAAATGCGATAAGTAATGTGAATTGCAGAATTCAGTGAATCATCGAATCTTTGAACGCACATTGCGCCCGCCGGTATTCCGGCGGGCATGCCTGTTCGAGCGTCATTTCAACCCTCAAGCCTCGGCTTGGTGTTGGGGCGCCCGGGCCCTCCGCGGCCCGGGGCCCCCAAGTTCATCGGCGGGCTCGTCGGTTCACTGAGCGCAGTAAAACGCG…	Eukaryota	Fungi	Ascomycota	Pezizomycotina	Sordariomycetes	Sordariomycetidae	NA	Magnaporthales	NA	NA	NA	Pyriculariaceae	Pyricularia	Pyricularia oryzae	Kenya	0	37.9
NCBI	MN202950	NA	AGGGATCATTACTGAGTTGAAAAACTCCAACCCCTGTGAACATAACCTCCTGTCGTTGCTTCGGCGGGCACGCCCGCCGGAGGTTCAAAACTCTTATTTTTTTCAGTATCTCTGAGCCTAAAAGACAAATAATCAAAACTTTCAACAACGGATCTCTTGGTTCTGGCATCGATGAAGAACGCAGCGAAATGCGATAAGTAATGTGAATTGCAGAATTCAGTGAATCATCGAATCTTTGAACGCACATTGCGCCCGCCGGTATTCCGGCGGGCATGCCTGTTCGAGCGTCATTTCAACCCTCAAGCCTCGGCTTGGTGTTGGGGCGCCCGGGCCCTCCGCGGCCCGGGGCCCCCAAGTTCATCGGCGGGCTCGTCGGTTCACTGAGCGCAGTAAAACGCG…	Eukaryota	Fungi	Ascomycota	Pezizomycotina	Sordariomycetes	Sordariomycetidae	NA	Magnaporthales	NA	NA	NA	Pyriculariaceae	Pyricularia	Pyricularia oryzae	Kenya	0	37.9
NCBI	MN202949	NA	AGGGATCATTACTGAGTTGAAAAACTCCAACCCCTGTGAACATAACCTCCTGTCGTTGCTTCGGCGGGCACGCCCGCCGGAGGTTCAAAACTCTTATTTTTTTCAGTATCTCTGAGCCTAAAAGACAAATAATCAAAACTTTCAACAACGGATCTCTTGGTTCTGGCATCGATGAAGAACGCAGCGAAATGCGATAAGTAATGTGAATTGCAGAATTCAGTGAATCATCGAATCTTTGAACGCACATTGCGCCCGCCGGTATTCCGGCGGGCATGCCTGTTCGAGCGTCATTTCAACCCTCAAGCCTCGGCTTGGTGTTGGGGCGCCCGGGCCCTCCGCGGCCCGGGGCCCCCAAGTTCATCGGCGGGCTCGTCGGTACACTGAGCGCAGTAAAACGCG…	Eukaryota	Fungi	Ascomycota	Pezizomycotina	Sordariomycetes	Sordariomycetidae	NA	Magnaporthales	NA	NA	NA	Pyriculariaceae	Pyricularia	Pyricularia oryzae	Kenya	0	37.9
NCBI	MN202948	NA	AGGGATCATTACTGAGTTGAAAAACTCCAACCCCTGTGAACATAACCTCCTGTCGTTGCTTCGGCGGGCACGCCCGCCGGAGGTTCAAAACTCTTATTTTTTTCAGTATCTCTGAGCCTAAAAGACAAATAATCAAAACTTTCAACAACGGATCTCTTGGTTCTGGCATCGATGAAGAACGCAGCGAAATGCGATAAGTAATGTGAATTGCAGAATTCAGTGAATCATCGAATCTTTGAACGCACATTGCGCCCGCCGGTATTCCGGCGGGCATGCCTGTTCGAGCGTCATTTCAACCCTCAAGCCTCGGCTTGGTGTTGGGGCGCCCGGGCCCTCCGCGGCCCGGGGCCCCCAAGTTCATCGGCGGGCTCGTCGGTACACTGAGCGCAGTAAAACGCG…	Eukaryota	Fungi	Ascomycota	Pezizomycotina	Sordariomycetes	Sordariomycetidae	NA	Magnaporthales	NA	NA	NA	Pyriculariaceae	Pyricularia	Pyricularia oryzae	Kenya	0	37.9
NCBI	MN202947	NA	AGGGATCATTACTGAGTTGAAAAACTCCAACCCCTGTGAACATAACCTCCTGTCGTTGCTTCGGCGGGCACGCCCGCCGGAGGTTCAAAACTCTTATTTTTTTCAGTATCTCTGAGCCTAAAAGACAAATAATCAAAACTTTCAACAACGGATCTCTTGGTTCTGGCATCGATGAAGAACGCAGCGAAATGCGATAAGTAATGTGAATTGCAGAATTCAGTGAATCATCGAATCTTTGAACGCACATTGCGCCCGCCGGTATTCCGGCGGGCATGCCTGTTCGAGCGTCATTTCAACCCTCAAGCCTCGGCTTGGTGTTGGGGCGCCCGGGCCCTCCGCGGCCCGGGGCCCCCAAGTTCATCGGCGGGCTCGTCGGTTCACTGAGCGCAGTAAAACGCG…	Eukaryota	Fungi	Ascomycota	Pezizomycotina	Sordariomycetes	Sordariomycetidae	NA	Magnaporthales	NA	NA	NA	Pyriculariaceae	Pyricularia	Pyricularia oryzae	Kenya	0	37.9
NCBI	MN202946	NA	AGGGATCATTACTGAGTTGAAAAACTCCAACCCCTGTGAACATAACCTCCTGTCGTTGCTTCGGCGGGCACGCCCGCCGGAGGTTCAAAACTCTTATTTTTTTCAGTATCTCTGAGCCTAAAAGACAAATAATCAAAACTTTCAACAACGGATCTCTTGGTTCTGGCATCGATGAAGAACGCAGCGAAATGCGATAAGTAATGTGAATTGCAGAATTCAGTGAATCATCGAATCTTTGAACGCACATTGCGCCCGCCGGTATTCCGGCGGGCATGCCTGTTCGAGCGTCATTTCAACCCTCAAGCCTCGGCTTGGTGTTGGGGCGCCCGGGCCCTCCGCGGCCCGGGGCCCCCAAGTTCATCGGCGGGCTCGTCGGTTCACTGAGCGCAGTAAAACGCG…	Eukaryota	Fungi	Ascomycota	Pezizomycotina	Sordariomycetes	Sordariomycetidae	NA	Magnaporthales	NA	NA	NA	Pyriculariaceae	Pyricularia	Pyricularia oryzae	Kenya	0	37.9
NCBI	MN202945	NA	AGGGATCATTACTGAGTTGAAAAACTCCAACCCCTGTGAACATAACCTCCTGTCGTTGCTTCGGCGGGCACGCCCGCCGGAGGTTCAAAACTCTTATTTTTTTCAGTATCTCTGAGCCTAAAAGACAAATAATCAAAACTTTCAACAACGGATCTCTTGGTTCTGGCATCGATGAAGAACGCAGCGAAATGCGATAAGTAATGTGAATTGCAGAATTCAGTGAATCATCGAATCTTTGAACGCACATTGCGCCCGCCGGTATTCCGGCGGGCATGCCTGTTCGAGCGTCATTTCAACCCTCAAGCCTCGGCTTGGTGTTGGGGCGCCCGGGCCCTCCGCGGCCCGGGGCCCCCAAGTTCATCGGCGGGCTCGTCGGTTCACTGAGCGCAGTAAAACGCG…	Eukaryota	Fungi	Ascomycota	Pezizomycotina	Sordariomycetes	Sordariomycetidae	NA	Magnaporthales	NA	NA	NA	Pyriculariaceae	Pyricularia	Pyricularia oryzae	Kenya	0	37.9
NCBI	MN202944	NA	AGGGATCATTACTGAGTTGAAAAACTCCAACCCCTGTGAACATAACCTCCTGTCGTTGCTTCGGCGGGCACGCCCGCCGGAGGTTCAAAACTCTTATTTTTTTCAGTATCTCTGAGCCTAAAAGACAAATAATCAAAACTTTCAACAACGGATCTCTTGGTTCTGGCATCGATGAAGAACGCAGCGAAATGCGATAAGTAATGTGAATTGCAGAATTCAGTGAATCATCGAATCTTTGAACGCACATTGCGCCCGCCGGTATTCCGGCGGGCATGCCTGTTCGAGCGTCATTTCAACCCTCAAGCCTCGGCTTGGTGTTGGGGCGCCCGGGCCCTCCGCGGCCCGGGGCCCCCAAGTTCATCGGCGGGCTCGTCGGTTCACTGAGCGCAGTAAAACGCG…	Eukaryota	Fungi	Ascomycota	Pezizomycotina	Sordariomycetes	Sordariomycetidae	NA	Magnaporthales	NA	NA	NA	Pyriculariaceae	Pyricularia	Pyricularia oryzae	Kenya	0	37.9
NCBI	MN202943	NA	AGGGATCATTACTGAGTTGAAAAACTCCAACCCCTGTGAACATAACCTCCTGTCGTTGCTTCGGCGGGCACGCCCGCCGGAGGTTCAAAACTCTTATTTTTTTCAGTATCTCTGAGCCTAAAAGACAAATAATCAAAACTTTCAACAACGGATCTCTTGGTTCTGGCATCGATGAAGAACGCAGCGAAATGCGATAAGTAATGTGAATTGCAGAATTCAGTGAATCATCGAATCTTTGAACGCACATTGCGCCCGCCGGTATTCCGGCGGGCATGCCTGTTCGAGCGTCATTTCAACCCTCAAGCCTCGGCTTGGTGTTGGGGCGCCCGGGCCCTCCGCGGCCCGGGGCCCCCAAGTTCATCGGCGGGCTCGTCGGTTCACTGAGCGCAGTAAAACGCG…	Eukaryota	Fungi	Ascomycota	Pezizomycotina	Sordariomycetes	Sordariomycetidae	NA	Magnaporthales	NA	NA	NA	Pyriculariaceae	Pyricularia	Pyricularia oryzae	Kenya	0	37.9
NCBI	MN202942	NA	AGGGATCATTACTGAGTTGAAAAACTCCAACCCCTGTGAACATAACCTCCTGTCGTTGCTTCGGCGGGCACGCCCGCCGGAGGTTCAAAACTCTTATTTTTTTCAGTATCTCTGAGCCTAAAAGACAAATAATCAAAACTTTCAACAACGGATCTCTTGGTTCTGGCATCGATGAAGAACGCAGCGAAATGCGATAAGTAATGTGAATTGCAGAATTCAGTGAATCATCGAATCTTTGAACGCACATTGCGCCCGCCGGTATTCCGGCGGGCATGCCTGTTCGAGCGTCATTTCAACCCTCAAGCCTCGGCTTGGTGTTGGGGCGCCCGGGCCCTCCGCGGCCCGGGGCCCCCAAGTTCATCGGCGGGCTCGTCGGTTCACTGAGCGCAGTAAAACGCG…	Eukaryota	Fungi	Ascomycota	Pezizomycotina	Sordariomycetes	Sordariomycetidae	NA	Magnaporthales	NA	NA	NA	Pyriculariaceae	Pyricularia	Pyricularia oryzae	Kenya	0	37.9
NCBI	MN202941	NA	AGGGATCATTACTGAGTTGAAAAACTCCAACCCCTGTGAACATAACCTCCTGTCGTTGCTTCGGCGGGCACGCCCGCCGGAGGTTCAAAACTCTTATTTTTTTCAGTATCTCTGAGCCTAAAAGACAAATAATCAAAACTTTCAACAACGGATCTCTTGGTTCTGGCATCGATGAAGAACGCAGCGAAATGCGATAAGTAATGTGAATTGCAGAATTCAGTGAATCATCGAATCTTTGAACGCACATTGCGCCCGCCGGTATTCCGGCGGGCATGCCTGTTCGAGCGTCATTTCAACCCTCAAGCCTCGGCTTGGTGTTGGGGCGCCCGGGCCCTCCGCGGCCCGGGGCCCCCAAGTTCATCGGCGGGCTCGTCGGTTCACTGAGCGCAGTAAAACGCG…	Eukaryota	Fungi	Ascomycota	Pezizomycotina	Sordariomycetes	Sordariomycetidae	NA	Magnaporthales	NA	NA	NA	Pyriculariaceae	Pyricularia	Pyricularia oryzae	Kenya	0	37.9
NCBI	MN202940	NA	AGGGATCATTACTGAGTTGAAAAACTCCAACCCCTGTGAACATAACCTCCTGTCGTTGCTTCGGCGGGCACGCCCGCCGGAGGTTCAAAACTCTTATTTTTTTCAGTATCTCTGAGCCTAAAAGACAAATAATCAAAACTTTCAACAACGGATCTCTTGGTTCTGGCATCGATGAAGAACGCAGCGAAATGCGATAAGTAATGTGAATTGCAGAATTCAGTGAATCATCGAATCTTTGAACGCACATTGCGCCCGCCGGTATTCCGGCGGGCATGCCTGTTCGAGCGTCATTTCAACCCTCAAGCCTCGGCTTGGTGTTGGGGCGCCCGGGCCCTCCGCGGCCCGGGGCCCCCAAGTTCATCGGCGGGCTCGTCGGTTCACTGAGCGCAGTAAAACGCG…	Eukaryota	Fungi	Ascomycota	Pezizomycotina	Sordariomycetes	Sordariomycetidae	NA	Magnaporthales	NA	NA	NA	Pyriculariaceae	Pyricularia	Pyricularia oryzae	Kenya	0	37.9
NCBI	MN202939	NA	AGGGATCATTACTGAGTTGAAAAACTCCAACCCCTGTGAACATAACCTCCTGTCGTTGCTTCGGCGGGCACGCCCGCCGGAGGTTCAAAACTCTTATTTTTTTCAGTATCTCTGAGCCTAAAAGACAAATAATCAAAACTTTCAACAACGGATCTCTTGGTTCTGGCATCGATGAAGAACGCAGCGAAATGCGATAAGTAATGTGAATTGCAGAATTCAGTGAATCATCGAATCTTTGAACGCACATTGCGCCCGCCGGTATTCCGGCGGGCATGCCTGTTCGAGCGTCATTTCAACCCTCAAGCCTCGGCTTGGTGTTGGGGCGCCCGGGCCCTCCGCGGCCCGGGGCCCCCAAGTTCATCGGCGGGCTCGTCGGTTCACTGAGCGCAGTAAAACGCG…	Eukaryota	Fungi	Ascomycota	Pezizomycotina	Sordariomycetes	Sordariomycetidae	NA	Magnaporthales	NA	NA	NA	Pyriculariaceae	Pyricularia	Pyricularia oryzae	Kenya	0	37.9
NCBI	MN202938	NA	AGGGATCATTACTGAGTTGAAAAACTCCAACCCCTGTGAACATAACCTCCTGTCGTTGCTTCGGCGGGCACGCCCGCCGGAGGTTCAAAACTCTTATTTTTTTCAGTATCTCTGAGCCTAAAAGACAAATAATCAAAACTTTCAACAACGGATCTCTTGGTTCTGGCATCGATGAAGAACGCAGCGAAATGCGATAAGTAATGTGAATTGCAGAATTCAGTGAATCATCGAATCTTTGAACGCACATTGCGCCCGCCGGTATTCCGGCGGGCATGCCTGTTCGAGCGTCATTTCAACCCTCAAGCCTCGGCTTGGTGTTGGGGCGCCCGGGCCCTCCGCGGCCCGGGGCCCCCAAGTTCATCGGCGGGCTCGTCGGTTCACTGAGCGCAGTAAAACGCG…	Eukaryota	Fungi	Ascomycota	Pezizomycotina	Sordariomycetes	Sordariomycetidae	NA	Magnaporthales	NA	NA	NA	Pyriculariaceae	Pyricularia	Pyricularia oryzae	Kenya	0	37.9
NCBI	MN202937	NA	AGGGATCATTACTGAGTTGAAAAACTCCAACCCCTGTGAACATAACCTCCTGTCGTTGCTTCGGCGGGCACGCCCGCCGGAGGTTCAAAACTCTTATTTTTTTCAGTATCTCTGAGCCTAAAAGACAAATAATCAAAACTTTCAACAACGGATCTCTTGGTTCTGGCATCGATGAAGAACGCAGCGAAATGCGATAAGTAATGTGAATTGCAGAATTCAGTGAATCATCGAATCTTTGAACGCACATTGCGCCCGCCGGTATTCCGGCGGGCATGCCTGTTCGAGCGTCATTTCAACCCTCAAGCCTCGGCTTGGTGTTGGGGCGCCCGGGCCCTCCGCGGCCCGGGGCCCCCAAGTTCATCGGCGGGCTCGTCGGTTCACTGAGCGCAGTAAAACGCG…	Eukaryota	Fungi	Ascomycota	Pezizomycotina	Sordariomycetes	Sordariomycetidae	NA	Magnaporthales	NA	NA	NA	Pyriculariaceae	Pyricularia	Pyricularia oryzae	Kenya	0	37.9
NCBI	MN202936	NA	AGGGATCATTACTGAGTTGAAAAACTCCAACCCCTGTGAACATAACCTCCTGTCGTTGCTTCGGCGGGCACGCCCGCCGGAGGTTCAAAACTCTTATTTTTTTCAGTATCTCTGAGCCTAAAAGACAAATAATCAAAACTTTCAACAACGGATCTCTTGGTTCTGGCATCGATGAAGAACGCAGCGAAATGCGATAAGTAATGTGAATTGCAGAATTCAGTGAATCATCGAATCTTTGAACGCACATTGCGCCCGCCGGTATTCCGGCGGGCATGCCTGTTCGAGCGTCATTTCAACCCTCAAGCCTCGGCTTGGTGTTGGGGCGCCCGGGCCCTCCGCGGCCCGGGGCCCCCAAGTTCATCGGCGGGCTCGTCGGTTCACTGAGCGCAGTAAAACGCG…	Eukaryota	Fungi	Ascomycota	Pezizomycotina	Sordariomycetes	Sordariomycetidae	NA	Magnaporthales	NA	NA	NA	Pyriculariaceae	Pyricularia	Pyricularia oryzae	Kenya	0	37.9
NCBI	MN202935	NA	AGGGATCATTACTGAGTTGAAAAACTCCAACCCCTGTGAACATAACCTCCTGTCGTTGCTTCGGCGGGCACGCCCGCCGGAGGTTCAAAACTCTTATTTTTTTCAGTATCTCTGAGCCTAAAAGACAAATAATCAAAACTTTCAACAACGGATCTCTTGGTTCTGGCATCGATGAAGAACGCAGCGAAATGCGATAAGTAATGTGAATTGCAGAATTCAGTGAATCATCGAATCTTTGAACGCACATTGCGCCCGCCGGTATTCCGGCGGGCATGCCTGTTCGAGCGTCATTTCAACCCTCAAGCCTCGGCTTGGTGTTGGGGCGCCCGGGCCCTCCGCGGCCCGGGGCCCCCAAGTTCATCGGCGGGCTCGTCGGTACACTGAGCGCAGTAAAACGCG…	Eukaryota	Fungi	Ascomycota	Pezizomycotina	Sordariomycetes	Sordariomycetidae	NA	Magnaporthales	NA	NA	NA	Pyriculariaceae	Pyricularia	Pyricularia oryzae	Kenya	0	37.9
NCBI	MN202934	NA	AGGGATCATTACTGAGTTGAAAAACTCCAACCCCTGTGAACATAACCTCCTGTCGTTGCTTCGGCGGGCACGCCCGCCGGAGGTTCAAAACTCTTATTTTTTTCAGTATCTCTGAGCCTAAAAGACAAATAATCAAAACTTTCAACAACGGATCTCTTGGTTCTGGCATCGATGAAGAACGCAGCGAAATGCGATAAGTAATGTGAATTGCAGAATTCAGTGAATCATCGAATCTTTGAACGCACATTGCGCCCGCCGGTATTCCGGCGGGCATGCCTGTTCGAGCGTCATTTCAACCCTCAAGCCTCGGCTTGGTGTTGGGGCGCCCGGGCCCTCCGCGGCCCGGGGCCCCCAAGTTCATCGGCGGGCTCGTCGGTTCACTGAGCGCAGTAAAACGCG…	Eukaryota	Fungi	Ascomycota	Pezizomycotina	Sordariomycetes	Sordariomycetidae	NA	Magnaporthales	NA	NA	NA	Pyriculariaceae	Pyricularia	Pyricularia oryzae	Kenya	0	37.9
NCBI	MN202933	NA	AGGGATCATTACTGAGTTGAAAAACTCCAACCCCTGTGAACATAACCTCCTGTCGTTGCTTCGGCGGGCACGCCCGCCGGAGGTTCAAAACTCTTATTTTTTTCAGTATCTCTGAGCCTAAAAGACAAATAATCAAAACTTTCAACAACGGATCTCTTGGTTCTGGCATCGATGAAGAACGCAGCGAAATGCGATAAGTAATGTGAATTGCAGAATTCAGTGAATCATCGAATCTTTGAACGCACATTGCGCCCGCCGGTATTCCGGCGGGCATGCCTGTTCGAGCGTCATTTCAACCCTCAAGCCTCGGCTTGGTGTTGGGGCGCCCGGGCCCTCCGCGGCCCGGGGCCCCCAAGTTCATCGGCGGGCTCGTCGGTTCACTGAGCGCAGTAAAACGCG…	Eukaryota	Fungi	Ascomycota	Pezizomycotina	Sordariomycetes	Sordariomycetidae	NA	Magnaporthales	NA	NA	NA	Pyriculariaceae	Pyricularia	Pyricularia oryzae	Kenya	0	37.9
NCBI	MN202932	NA	AGGGATCATTACTGAGTTGAAAAACTCCAACCCCTGTGAACATAACCTCCTGTCGTTGCTTCGGCGGGCACGCCCGCCGGAGGTTCAAAACTCTTATTTTTTTCAGTATCTCTGAGCCTAAAAGACAAATAATCAAAACTTTCAACAACGGATCTCTTGGTTCTGGCATCGATGAAGAACGCAGCGAAATGCGATAAGTAATGTGAATTGCAGAATTCAGTGAATCATCGAATCTTTGAACGCACATTGCGCCCGCCGGTATTCCGGCGGGCATGCCTGTTCGAGCGTCATTTCAACCCTCAAGCCTCGGCTTGGTGTTGGGGCGCCCGGGCCCTCCGCGGCCCGGGGCCCCCAAGTTCATCGGCGGGCTCGTCGGTTCACTGAGCGCAGTAAAACGCG…	Eukaryota	Fungi	Ascomycota	Pezizomycotina	Sordariomycetes	Sordariomycetidae	NA	Magnaporthales	NA	NA	NA	Pyriculariaceae	Pyricularia	Pyricularia oryzae	Kenya	0	37.9
NCBI	MN202931	NA	AGGGATCATTACTGAGTTGAAAAACTCCAACCCCTGTGAACATAACCTCCTGTCGTTGCTTCGGCGGGCACGCCCGCCGGAGGTTCAAAACTCTTATTTTTTTCAGTATCTCTGAGCCTAAAAGACAAATAATCAAAACTTTCAACAACGGATCTCTTGGTTCTGGCATCGATGAAGAACGCAGCGAAATGCGATAAGTAATGTGAATTGCAGAATTCAGTGAATCATCGAATCTTTGAACGCACATTGCGCCCGCCGGTATTCCGGCGGGCATGCCTGTTCGAGCGTCATTTCAACCCTCAAGCCTCGGCTTGGTGTTGGGGCGCCCGGGCCCTCCGCGGCCCGGGGCCCCCAAGTTCATCGGCGGGCTCGTCGGTTCACTGAGCGCAGTAAAACGCG…	Eukaryota	Fungi	Ascomycota	Pezizomycotina	Sordariomycetes	Sordariomycetidae	NA	Magnaporthales	NA	NA	NA	Pyriculariaceae	Pyricularia	Pyricularia oryzae	Kenya	0	37.9
NCBI	MN202930	NA	AGGGATCATTACTGAGTTGAAAAACTCCAACCCCTGTGAACATAACCTCCTGTCGTTGCTTCGGCGGGCACGCCCGCCGGAGGTTCAAAACTCTTATTTTTTTCAGTATCTCTGAGCCTAAAAGACAAATAATCAAAACTTTCAACAACGGATCTCTTGGTTCTGGCATCGATGAAGAACGCAGCGAAATGCGATAAGTAATGTGAATTGCAGAATTCAGTGAATCATCGAATCTTTGAACGCACATTGCGCCCGCCGGTATTCCGGCGGGCATGCCTGTTCGAGCGTCATTTCAACCCTCAAGCCTCGGCTTGGTGTTGGGGCGCCCGGGCCCTCCGCGGCCCGGGGCCCCCAAGTTCATCGGCGGGCTCGTCGGTTCACTGAGCGCAGTAAAACGCG…	Eukaryota	Fungi	Ascomycota	Pezizomycotina	Sordariomycetes	Sordariomycetidae	NA	Magnaporthales	NA	NA	NA	Pyriculariaceae	Pyricularia	Pyricularia oryzae	Kenya	0	37.9
NCBI	MN202929	NA	AGGGATCATTACTGAGTTGAAAAACTCCAACCCCTGTGAACATAACCTCCTGTCGTTGCTTCGGCGGGCACGCCCGCCGGAGGTTCAAAACTCTTATTTTTTTCAGTATCTCTGAGCCTAAAAGACAAATAATCAAAACTTTCAACAACGGATCTCTTGGTTCTGGCATCGATGAAGAACGCAGCGAAATGCGATAAGTAATGTGAATTGCAGAATTCAGTGAATCATCGAATCTTTGAACGCACATTGCGCCCGCCGGTATTCCGGCGGGCATGCCTGTTCGAGCGTCATTTCAACCCTCAAGCCTCGGCTTGGTGTTGGGGCGCCCGGGCCCTCCGCGGCCCGGGGCCCCCAAGTTCATCGGCGGGCTCGTCGGTTCACTGAGCGCAGTAAAACGCG…	Eukaryota	Fungi	Ascomycota	Pezizomycotina	Sordariomycetes	Sordariomycetidae	NA	Magnaporthales	NA	NA	NA	Pyriculariaceae	Pyricularia	Pyricularia oryzae	Kenya	0	37.9
NCBI	MN202928	NA	AGGGATCATTACTGAGTTGAAAAACTCCAACCCCTGTGAACATAACCTCCTGTCGTTGCTTCGGCGGGCACGCCCGCCGGAGGTTCAAAACTCTTATTTTTTTCAGTATCTCTGAGCCTAAAAGACAAATAATCAAAACTTTCAACAACGGATCTCTTGGTTCTGGCATCGATGAAGAACGCAGCGAAATGCGATAAGTAATGTGAATTGCAGAATTCAGTGAATCATCGAATCTTTGAACGCACATTGCGCCCGCCGGTATTCCGGCGGGCATGCCTGTTCGAGCGTCATTTCAACCCTCAAGCCTCGGCTTGGTGTTGGGGCGCCCGGGCCCTCCGCGGCCCGGGGCCCCCAAGTTCATCGGCGGGCTCGTCGGTTCACTGAGCGCAGTAAAACGCG…	Eukaryota	Fungi	Ascomycota	Pezizomycotina	Sordariomycetes	Sordariomycetidae	NA	Magnaporthales	NA	NA	NA	Pyriculariaceae	Pyricularia	Pyricularia oryzae	Kenya	0	37.9
NCBI	MN202927	NA	AGGGATCATTACTGAGTTGAAAAACTCCAACCCCTGTGAACATAACCTCCTGTCGTTGCTTCGGCGGGCACGCCCGCCGGAGGTTCAAAACTCTTATTTTTTTCAGTATCTCTGAGCCTAAAAGACAAATAATCAAAACTTTCAACAACGGATCTCTTGGTTCTGGCATCGATGAAGAACGCAGCGAAATGCGATAAGTAATGTGAATTGCAGAATTCAGTGAATCATCGAATCTTTGAACGCACATTGCGCCCGCCGGTATTCCGGCGGGCATGCCTGTTCGAGCGTCATTTCAACCCTCAAGCCTCGGCTTGGTGTTGGGGCGCCCGGGCCCTCCGCGGCCCGGGGCCCCCAAGTTCATCGGCGGGCTCGTCGGTTCACTGAGCGCAGTAAAACGCG…	Eukaryota	Fungi	Ascomycota	Pezizomycotina	Sordariomycetes	Sordariomycetidae	NA	Magnaporthales	NA	NA	NA	Pyriculariaceae	Pyricularia	Pyricularia oryzae	Kenya	0	37.9
NCBI	MN202926	NA	AGGGATCATTACTGAGTTGAAAAACTCCAACCCCTGTGAACATAACCTCCTGTCGTTGCTTCGGCGGGCACGCCCGCCGGAGGTTCAAAACTCTTATTTTTTTCAGTATCTCTGAGCCTAAAAGACAAATAATCAAAACTTTCAACAACGGATCTCTTGGTTCTGGCATCGATGAAGAACGCAGCGAAATGCGATAAGTAATGTGAATTGCAGAATTCAGTGAATCATCGAATCTTTGAACGCACATTGCGCCCGCCGGTATTCCGGCGGGCATGCCTGTTCGAGCGTCATTTCAACCCTCAAGCCTCGGCTTGGTGTTGGGGCGCCCGGGCCCTCCGCGGCCCGGGGCCCCCAAGTTCATCGGCGGGCTCGTCGGTTCACTGAGCGCAGTAAAACGCG…	Eukaryota	Fungi	Ascomycota	Pezizomycotina	Sordariomycetes	Sordariomycetidae	NA	Magnaporthales	NA	NA	NA	Pyriculariaceae	Pyricularia	Pyricularia oryzae	Kenya	0	37.9
NCBI	MN202925	NA	AGGGATCATTACTGAGTTGAAAAACTCCAACCCCTGTGAACATAACCTCCTGTCGTTGCTTCGGCGGGCACGCCCGCCGGAGGTTCAAAACTCTTATTTTTTTCAGTATCTCTGAGCCTAAAAGACAAATAATCAAAACTTTCAACAACGGATCTCTTGGTTCTGGCATCGATGAAGAACGCAGCGAAATGCGATAAGTAATGTGAATTGCAGAATTCAGTGAATCATCGAATCTTTGAACGCACATTGCGCCCGCCGGTATTCCGGCGGGCATGCCTGTTCGAGCGTCATTTCAACCCTCAAGCCTCGGCTTGGTGTTGGGGCGCCCGGGCCCTCCGCGGCCCGGGGCCCCCAAGTTCATCGGCGGGCTCGTCGGTTCACTGAGCGCAGTAAAACGCG…	Eukaryota	Fungi	Ascomycota	Pezizomycotina	Sordariomycetes	Sordariomycetidae	NA	Magnaporthales	NA	NA	NA	Pyriculariaceae	Pyricularia	Pyricularia oryzae	Kenya	0	37.9
NCBI	MN202924	NA	AGGGATCATTACTGAGTTGAAAAACTCCAACCCCTGTGAACATAACCTCCTGTCGTTGCTTCGGCGGGCACGCCCGCCGGAGGTTCAAAACTCTTATTTTTTTCAGTATCTCTGAGCCTAAAAGACAAATAATCAAAACTTTCAACAACGGATCTCTTGGTTCTGGCATCGATGAAGAACGCAGCGAAATGCGATAAGTAATGTGAATTGCAGAATTCAGTGAATCATCGAATCTTTGAACGCACATTGCGCCCGCCGGTATTCCGGCGGGCATGCCTGTTCGAGCGTCATTTCAACCCTCAAGCCTCGGCTTGGTGTTGGGGCGCCCGGGCCCTCCGCGGCCCGGGGCCCCCAAGTTCATCGGCGGGCTCGTCGGTTCACTGAGCGCAGTAAAACGCG…	Eukaryota	Fungi	Ascomycota	Pezizomycotina	Sordariomycetes	Sordariomycetidae	NA	Magnaporthales	NA	NA	NA	Pyriculariaceae	Pyricularia	Pyricularia oryzae	Kenya	0	37.9
NCBI	MN202923	NA	AGGGATCATTACTGAGTTGAAAAACTCCAACCCCTGTGAACATAACCTCCTGTCGTTGCTTCGGCGGGCACGCCCGCCGGAGGTTCAAAACTCTTATTTTTTTCAGTATCTCTGAGCCTAAAAGACAAATAATCAAAACTTTCAACAACGGATCTCTTGGTTCTGGCATCGATGAAGAACGCAGCGAAATGCGATAAGTAATGTGAATTGCAGAATTCAGTGAATCATCGAATCTTTGAACGCACATTGCGCCCGCCGGTATTCCGGCGGGCATGCCTGTTCGAGCGTCATTTCAACCCTCAAGCCTCGGCTTGGTGTTGGGGCGCCCGGGCCCTCCGCGGCCCGGGGCCCCCAAGTTCATCGGCGGGCTCGTCGGTTCACTGAGCGCAGTAAAACGCG…	Eukaryota	Fungi	Ascomycota	Pezizomycotina	Sordariomycetes	Sordariomycetidae	NA	Magnaporthales	NA	NA	NA	Pyriculariaceae	Pyricularia	Pyricularia oryzae	Kenya	0	37.9
NCBI	MN202922	NA	AGGGATCATTACTGAGTTGAAAAACTCCAACCCCTGTGAACATAACCTCCTGTCGTTGCTTCGGCGGGCACGCCCGCCGGAGGTTCAAAACTCTTATTTTTTTCAGTATCTCTGAGCCTAAAAGACAAATAATCAAAACTTTCAACAACGGATCTCTTGGTTCTGGCATCGATGAAGAACGCAGCGAAATGCGATAAGTAATGTGAATTGCAGAATTCAGTGAATCATCGAATCTTTGAACGCACATTGCGCCCGCCGGTATTCCGGCGGGCATGCCTGTTCGAGCGTCATTTCAACCCTCAAGCCTCGGCTTGGTGTTGGGGCGCCCGGGCCCTCCGCGGCCCGGGGCCCCCAAGTTCATCGGCGGGCTCGTCGGTTCACTGAGCGCAGTAAAACGCG…	Eukaryota	Fungi	Ascomycota	Pezizomycotina	Sordariomycetes	Sordariomycetidae	NA	Magnaporthales	NA	NA	NA	Pyriculariaceae	Pyricularia	Pyricularia oryzae	Kenya	0	37.9
NCBI	MN202921	NA	AGGGATCATTACTGAGTTGAAAAACTCCAACCCCTGTGAACATAACCTCCTGTCGTTGCTTCGGCGGGCACGCCCGCCGGAGGTTCAAAACTCTTATTTTTTTCAGTATCTCTGAGCCTAAAAGACAAATAATCAAAACTTTCAACAACGGATCTCTTGGTTCTGGCATCGATGAAGAACGCAGCGAAATGCGATAAGTAATGTGAATTGCAGAATTCAGTGAATCATCGAATCTTTGAACGCACATTGCGCCCGCCGGTATTCCGGCGGGCATGCCTGTTCGAGCGTCATTTCAACCCTCAAGCCTCGGCTTGGTGTTGGGGCGCCCGGGCCCTCCGCGGCCCGGGGCCCCCAAGTTCATCGGCGGGCTCGTCGGTTCACTGAGCGCAGTAAAACGCG…	Eukaryota	Fungi	Ascomycota	Pezizomycotina	Sordariomycetes	Sordariomycetidae	NA	Magnaporthales	NA	NA	NA	Pyriculariaceae	Pyricularia	Pyricularia oryzae	Kenya	0	37.9
NCBI	MN202920	NA	AGGGATCATTACTGAGTTGAAAAACTCCAACCCCTGTGAACATAACCTCCTGTCGTTGCTTCGGCGGGCACGCCCGCCGGAGGTTCAAAACTCTTATTTTTTTCAGTATCTCTGAGCCTAAAAGACAAATAATCAAAACTTTCAACAACGGATCTCTTGGTTCTGGCATCGATGAAGAACGCAGCGAAATGCGATAAGTAATGTGAATTGCAGAATTCAGTGAATCATCGAATCTTTGAACGCACATTGCGCCCGCCGGTATTCCGGCGGGCATGCCTGTTCGAGCGTCATTTCAACCCTCAAGCCTCGGCTTGGTGTTGGGGCGCCCGGGCCCTCCGCGGCCCGGGGCCCCCAAGTTCATCGGCGGGCTCGTCGGTTCACTGAGCGCAGTAAAACGCG…	Eukaryota	Fungi	Ascomycota	Pezizomycotina	Sordariomycetes	Sordariomycetidae	NA	Magnaporthales	NA	NA	NA	Pyriculariaceae	Pyricularia	Pyricularia oryzae	Kenya	0	37.9
NCBI	MN202919	NA	AGGGATCATTACTGAGTTGAAAAACTCCAACCCCTGTGAACATAACCTCCTGTCGTTGCTTCGGCGGGCACGCCCGCCGGAGGTTCAAAACTCTTATTTTTTTCAGTATCTCTGAGCCTAAAAGACAAATAATCAAAACTTTCAACAACGGATCTCTTGGTTCTGGCATCGATGAAGAACGCAGCGAAATGCGATAAGTAATGTGAATTGCAGAATTCAGTGAATCATCGAATCTTTGAACGCACATTGCGCCCGCCGGTATTCCGGCGGGCATGCCTGTTCGAGCGTCATTTCAACCCTCAAGCCTCGGCTTGGTGTTGGGGCGCCCGGGCCCTCCGCGGCCCGGGGCCCCCAAGTTCATCGGCGGGCTCGTCGGTTCACTGAGCGCAGTAAAACGCG…	Eukaryota	Fungi	Ascomycota	Pezizomycotina	Sordariomycetes	Sordariomycetidae	NA	Magnaporthales	NA	NA	NA	Pyriculariaceae	Pyricularia	Pyricularia oryzae	Kenya	0	37.9
NCBI	MN202918	NA	AGGGATCATTACTGAGTTGAAAAACTCCAACCCCTGTGAACATAACCTCCTGTCGTTGCTTCGGCGGGCACGCCCGCCGGAGGTTCAAAACTCTTATTTTTTTCAGTATCTCTGAGCCTAAAAGACAAATAATCAAAACTTTCAACAACGGATCTCTTGGTTCTGGCATCGATGAAGAACGCAGCGAAATGCGATAAGTAATGTGAATTGCAGAATTCAGTGAATCATCGAATCTTTGAACGCACATTGCGCCCGCCGGTATTCCGGCGGGCATGCCTGTTCGAGCGTCATTTCAACCCTCAAGCCTCGGCTTGGTGTTGGGGCGCCCGGGCCCTCCGCGGCCCGGGGCCCCCAAGTTCATCGGCGGGCTCGTCGGTTCACTGAGCGCAGTAAAACGCG…	Eukaryota	Fungi	Ascomycota	Pezizomycotina	Sordariomycetes	Sordariomycetidae	NA	Magnaporthales	NA	NA	NA	Pyriculariaceae	Pyricularia	Pyricularia oryzae	Kenya	0	37.9
NCBI	MN202917	NA	AGGGATCATTACTGAGTTGAAAAACTCCAACCCCTGTGAACATAACCTCCTGTCGTTGCTTCGGCGGGCACGCCCGCCGGAGGTTCAAAACTCTTATTTTTTTCAGTATCTCTGAGCCTAAAAGACAAATAATCAAAACTTTCAACAACGGATCTCTTGGTTCTGGCATCGATGAAGAACGCAGCGAAATGCGATAAGTAATGTGAATTGCAGAATTCAGTGAATCATCGAATCTTTGAACGCACATTGCGCCCGCCGGTATTCCGGCGGGCATGCCTGTTCGAGCGTCATTTCAACCCTCAAGCCTCGGCTTGGTGTTGGGGCGCCCGGGCCCTCCGCGGCCCGGGGCCCCCAAGTTCATCGGCGGGCTCGTCGGTTCACTGAGCGCAGTAAAACGCG…	Eukaryota	Fungi	Ascomycota	Pezizomycotina	Sordariomycetes	Sordariomycetidae	NA	Magnaporthales	NA	NA	NA	Pyriculariaceae	Pyricularia	Pyricularia oryzae	Kenya	0	37.9
NCBI	MN202916	NA	AGGGATCATTACTGAGTTGAAAAACTCCAACCCCTGTGAACATAACCTCCTGTCGTTGCTTCGGCGGGCACGCCCGCCGGAGGTTCAAAACTCTTATTTTTTTCAGTATCTCTGAGCCTAAAAGACAAATAATCAAAACTTTCAACAACGGATCTCTTGGTTCTGGCATCGATGAAGAACGCAGCGAAATGCGATAAGTAATGTGAATTGCAGAATTCAGTGAATCATCGAATCTTTGAACGCACATTGCGCCCGCCGGTATTCCGGCGGGCATGCCTGTTCGAGCGTCATTTCAACCCTCAAGCCTCGGCTTGGTGTTGGGGCGCCCGGGCCCTCCGCGGCCCGGGGCCCCCAAGTTCATCGGCGGGCTCGTCGGTTCACTGAGCGCAGTAAAACGCG…	Eukaryota	Fungi	Ascomycota	Pezizomycotina	Sordariomycetes	Sordariomycetidae	NA	Magnaporthales	NA	NA	NA	Pyriculariaceae	Pyricularia	Pyricularia oryzae	Kenya	0	37.9
NCBI	MN202915	NA	AGGGATCATTACTGAGTTGAAAAACTCCAACCCCTGTGAACATAACCTCCTGTCGTTGCTTCGGCGGGCACGCCCGCCGGAGGTTCAAAACTCTTATTTTTTTCAGTATCTCTGAGCCTAAAAGACAAATAATCAAAACTTTCAACAACGGATCTCTTGGTTCTGGCATCGATGAAGAACGCAGCGAAATGCGATAAGTAATGTGAATTGCAGAATTCAGTGAATCATCGAATCTTTGAACGCACATTGCGCCCGCCGGTATTCCGGCGGGCATGCCTGTTCGAGCGTCATTTCAACCCTCAAGCCTCGGCTTGGTGTTGGGGCGCCCGGGCCCTCCGCGGCCCGGGGCCCCCAAGTTCATCGGCGGGCTCGTCGGTTCACTGAGCGCAGTAAAACGCG…	Eukaryota	Fungi	Ascomycota	Pezizomycotina	Sordariomycetes	Sordariomycetidae	NA	Magnaporthales	NA	NA	NA	Pyriculariaceae	Pyricularia	Pyricularia oryzae	Kenya	0	37.9
NCBI	MN202914	NA	AGGGATCATTACTGAGTTGAAAAACTCCAACCCCTGTGAACATAACCTCCTGTCGTTGCTTCGGCGGGCACGCCCGCCGGAGGTTCAAAACTCTTATTTTTTTCAGTATCTCTGAGCCTAAAAGACAAATAATCAAAACTTTCAACAACGGATCTCTTGGTTCTGGCATCGATGAAGAACGCAGCGAAATGCGATAAGTAATGTGAATTGCAGAATTCAGTGAATCATCGAATCTTTGAACGCACATTGCGCCCGCCGGTATTCCGGCGGGCATGCCTGTTCGAGCGTCATTTCAACCCTCAAGCCTCGGCTTGGTGTTGGGGCGCCCGGGCCCTCCGCGGCCCGGGGCCCCCAAGTTCATCGGCGGGCTCGTCGGTTCACTGAGCGCAGTAAAACGCG…	Eukaryota	Fungi	Ascomycota	Pezizomycotina	Sordariomycetes	Sordariomycetidae	NA	Magnaporthales	NA	NA	NA	Pyriculariaceae	Pyricularia	Pyricularia oryzae	Kenya	0	37.9
NCBI	MN202913	NA	AGGGATCATTACTGAGTTGAAAAACTCCAACCCCTGTGAACATAACCTCCTGTCGTTGCTTCGGCGGGCACGCCCGCCGGAGGTTCAAAACTCTTATTTTTTTCAGTATCTCTGAGCCTAAAAGACAAATAATCAAAACTTTCAACAACGGATCTCTTGGTTCTGGCATCGATGAAGAACGCAGCGAAATGCGATAAGTAATGTGAATTGCAGAATTCAGTGAATCATCGAATCTTTGAACGCACATTGCGCCCGCCGGTATTCCGGCGGGCATGCCTGTTCGAGCGTCATTTCAACCCTCAAGCCTCGGCTTGGTGTTGGGGCGCCCGGGCCCTCCGCGGCCCGGGGCCCCCAAGTTCATCGGCGGGCTCGTCGGTTCACTGAGCGCAGTAAAACGCG…	Eukaryota	Fungi	Ascomycota	Pezizomycotina	Sordariomycetes	Sordariomycetidae	NA	Magnaporthales	NA	NA	NA	Pyriculariaceae	Pyricularia	Pyricularia oryzae	Kenya	0	37.9
NCBI	MN202912	NA	AGGGATCATTACTGAGTTGAAAAACTCCAACCCCTGTGAACATAACCTCCTGTCGTTGCTTCGGCGGGCACGCCCGCCGGAGGTTCAAAACTCTTATTTTTTTCAGTATCTCTGAGCCTAAAAGACAAATAATCAAAACTTTCAACAACGGATCTCTTGGTTCTGGCATCGATGAAGAACGCAGCGAAATGCGATAAGTAATGTGAATTGCAGAATTCAGTGAATCATCGAATCTTTGAACGCACATTGCGCCCGCCGGTATTCCGGCGGGCATGCCTGTTCGAGCGTCATTTCAACCCTCAAGCCTCGGCTTGGTGTTGGGGCGCCCGGGCCCTCCGCGGCCCGGGGCCCCCAAGTTCATCGGCGGGCTCGTCGGTTCACTGAGCGCAGTAAAACGCG…	Eukaryota	Fungi	Ascomycota	Pezizomycotina	Sordariomycetes	Sordariomycetidae	NA	Magnaporthales	NA	NA	NA	Pyriculariaceae	Pyricularia	Pyricularia oryzae	Kenya	0	37.9
NCBI	MN202911	NA	AGGGATCATTACTGAGTTGAAAAACTCCAACCCCTGTGAACATAACCTCCTGTCGTTGCTTCGGCGGGCACGCCCGCCGGAGGTTCAAAACTCTTATTTTTTTCAGTATCTCTGAGCCTAAAAGACAAATAATCAAAACTTTCAACAACGGATCTCTTGGTTCTGGCATCGATGAAGAACGCAGCGAAATGCGATAAGTAATGTGAATTGCAGAATTCAGTGAATCATCGAATCTTTGAACGCACATTGCGCCCGCCGGTATTCCGGCGGGCATGCCTGTTCGAGCGTCATTTCAACCCTCAAGCCTCGGCTTGGTGTTGGGGCGCCCGGGCCCTCCGCGGCCCGGGGCCCCCAAGTTCATCGGCGGGCTCGTCGGTTCACTGAGCGCAGTAAAACGCG…	Eukaryota	Fungi	Ascomycota	Pezizomycotina	Sordariomycetes	Sordariomycetidae	NA	Magnaporthales	NA	NA	NA	Pyriculariaceae	Pyricularia	Pyricularia oryzae	Kenya	0	37.9
NCBI	MN202910	NA	AGGGATCATTACTGAGTTGAAAAACTCCAACCCCTGTGAACATAACCTCCTGTCGTTGCTTCGGCGGGCACGCCCGCCGGAGGTTCAAAACTCTTATTTTTTTCAGTATCTCTGAGCCTAAAAGACAAATAATCAAAACTTTCAACAACGGATCTCTTGGTTCTGGCATCGATGAAGAACGCAGCGAAATGCGATAAGTAATGTGAATTGCAGAATTCAGTGAATCATCGAATCTTTGAACGCACATTGCGCCCGCCGGTATTCCGGCGGGCATGCCTGTTCGAGCGTCATTTCAACCCTCAAGCCTCGGCTTGGTGTTGGGGCGCCCGGGCCCTCCGCGGCCCGGGGCCCCCAAGTTCATCGGCGGGCTCGTCGGTTCACTGAGCGCAGTAAAACGCG…	Eukaryota	Fungi	Ascomycota	Pezizomycotina	Sordariomycetes	Sordariomycetidae	NA	Magnaporthales	NA	NA	NA	Pyriculariaceae	Pyricularia	Pyricularia oryzae	Kenya	0	37.9
NCBI	MN202909	NA	AGGGATCATTACTGAGTTGAAAAACTCCAACCCCTGTGAACATAACCTCCTGTCGTTGCTTCGGCGGGCACGCCCGCCGGAGGTTCAAAACTCTTATTTTTTTCAGTATCTCTGAGCCTAAAAGACAAATAATCAAAACTTTCAACAACGGATCTCTTGGTTCTGGCATCGATGAAGAACGCAGCGAAATGCGATAAGTAATGTGAATTGCAGAATTCAGTGAATCATCGAATCTTTGAACGCACATTGCGCCCGCCGGTATTCCGGCGGGCATGCCTGTTCGAGCGTCATTTCAACCCTCAAGCCTCGGCTTGGTGTTGGGGCGCCCGGGCCCTCCGCGGCCCGGGGCCCCCAAGTTCATCGGCGGGCTCGTCGGTTCACTGAGCGCAGTAAAACGCG…	Eukaryota	Fungi	Ascomycota	Pezizomycotina	Sordariomycetes	Sordariomycetidae	NA	Magnaporthales	NA	NA	NA	Pyriculariaceae	Pyricularia	Pyricularia oryzae	Kenya	0	37.9
NCBI	MN202908	NA	AGGGATCATTACTGAGTTGAAAAACTCCAACCCCTGTGAACATAACCTCCTGTCGTTGCTTCGGCGGGCACGCCCGCCGGAGGTTCAAAACTCTTATTTTTTTCAGTATCTCTGAGCCTAAAAGACAAATAATCAAAACTTTCAACAACGGATCTCTTGGTTCTGGCATCGATGAAGAACGCAGCGAAATGCGATAAGTAATGTGAATTGCAGAATTCAGTGAATCATCGAATCTTTGAACGCACATTGCGCCCGCCGGTATTCCGGCGGGCATGCCTGTTCGAGCGTCATTTCAACCCTCAAGCCTCGGCTTGGTGTTGGGGCGCCCGGGCCCTCCGCGGCCCGGGGCCCCCAAGTTCATCGGCGGGCTCGTCGGTTCACTGAGCGCAGTAAAACGCG…	Eukaryota	Fungi	Ascomycota	Pezizomycotina	Sordariomycetes	Sordariomycetidae	NA	Magnaporthales	NA	NA	NA	Pyriculariaceae	Pyricularia	Pyricularia oryzae	Kenya	0	37.9
NCBI	MN202907	NA	AGGGATCATTACTGAGTTGAAAAACTCCAACCCCTGTGAACATAACCTCCTGTCGTTGCTTCGGCGGGCACGCCCGCCGGAGGTTCAAAACTCTTATTTTTTTCAGTATCTCTGAGCCTAAAAGACAAATAATCAAAACTTTCAACAACGGATCTCTTGGTTCTGGCATCGATGAAGAACGCAGCGAAATGCGATAAGTAATGTGAATTGCAGAATTCAGTGAATCATCGAATCTTTGAACGCACATTGCGCCCGCCGGTATTCCGGCGGGCATGCCTGTTCGAGCGTCATTTCAACCCTCAAGCCTCGGCTTGGTGTTGGGGCGCCCGGGCCCTCCGCGGCCCGGGGCCCCCAAGTTCATCGGCGGGCTCGTCGGTTCACTGAGCGCAGTAAAACGCG…	Eukaryota	Fungi	Ascomycota	Pezizomycotina	Sordariomycetes	Sordariomycetidae	NA	Magnaporthales	NA	NA	NA	Pyriculariaceae	Pyricularia	Pyricularia oryzae	Kenya	0	37.9
NCBI	MN202906	NA	AGGGATCATTACTGAGTTGAAAAACTCCAACCCCTGTGAACATAACCTCCTGTCGTTGCTTCGGCGGGCACGCCCGCCGGAGGTTCAAAACTCTTATTTTTTTCAGTATCTCTGAGCCTAAAAGACAAATAATCAAAACTTTCAACAACGGATCTCTTGGTTCTGGCATCGATGAAGAACGCAGCGAAATGCGATAAGTAATGTGAATTGCAGAATTCAGTGAATCATCGAATCTTTGAACGCACATTGCGCCCGCCGGTATTCCGGCGGGCATGCCTGTTCGAGCGTCATTTCAACCCTCAAGCCTCGGCTTGGTGTTGGGGCGCCCGGGCCCTCCGCGGCCCGGGGCCCCCAAGTTCATCGGCGGGCTCGTCGGTTCACTGAGCGCAGTAAAACGCG…	Eukaryota	Fungi	Ascomycota	Pezizomycotina	Sordariomycetes	Sordariomycetidae	NA	Magnaporthales	NA	NA	NA	Pyriculariaceae	Pyricularia	Pyricularia oryzae	Kenya	0	37.9
NCBI	MN202905	NA	AGGGATCATTACTGAGTTGAAAAACTCCAACCCCTGTGAACATAACCTCCTGTCGTTGCTTCGGCGGGCACGCCCGCCGGAGGTTCAAAACTCTTATTTTTTTCAGTATCTCTGAGCCTAAAAGACAAATAATCAAAACTTTCAACAACGGATCTCTTGGTTCTGGCATCGATGAAGAACGCAGCGAAATGCGATAAGTAATGTGAATTGCAGAATTCAGTGAATCATCGAATCTTTGAACGCACATTGCGCCCGCCGGTATTCCGGCGGGCATGCCTGTTCGAGCGTCATTTCAACCCTCAAGCCTCGGCTTGGTGTTGGGGCGCCCGGGCCCTCCGCGGCCCGGGGCCCCCAAGTTCATCGGCGGGCTCGTCGGTTCACTGAGCGCAGTAAAACGCG…	Eukaryota	Fungi	Ascomycota	Pezizomycotina	Sordariomycetes	Sordariomycetidae	NA	Magnaporthales	NA	NA	NA	Pyriculariaceae	Pyricularia	Pyricularia oryzae	Kenya	0	37.9
NCBI	MN202904	NA	AGGGATCATTACTGAGTTGAAAAACTCCAACCCCTGTGAACATAACCTCCTGTCGTTGCTTCGGCGGGCACGCCCGCCGGAGGTTCAAAACTCTTATTTTTTTCAGTATCTCTGAGCCTAAAAGACAAATAATCAAAACTTTCAACAACGGATCTCTTGGTTCTGGCATCGATGAAGAACGCAGCGAAATGCGATAAGTAATGTGAATTGCAGAATTCAGTGAATCATCGAATCTTTGAACGCACATTGCGCCCGCCGGTATTCCGGCGGGCATGCCTGTTCGAGCGTCATTTCAACCCTCAAGCCTCGGCTTGGTGTTGGGGCGCCCGGGCCCTCCGCGGCCCGGGGCCCCCAAGTTCATCGGCGGGCTCGTCGGTTCACTGAGCGCAGTAAAACGCG…	Eukaryota	Fungi	Ascomycota	Pezizomycotina	Sordariomycetes	Sordariomycetidae	NA	Magnaporthales	NA	NA	NA	Pyriculariaceae	Pyricularia	Pyricularia oryzae	Kenya	0	37.9
NCBI	MN202903	NA	AGGGATCATTACTGAGTTGAAAAACTCCAACCCCTGTGAACATAACCTCCTGTCGTTGCTTCGGCGGGCACGCCCGCCGGAGGTTCAAAACTCTTATTTTTTTCAGTATCTCTGAGCCTAAAAGACAAATAATCAAAACTTTCAACAACGGATCTCTTGGTTCTGGCATCGATGAAGAACGCAGCGAAATGCGATAAGTAATGTGAATTGCAGAATTCAGTGAATCATCGAATCTTTGAACGCACATTGCGCCCGCCGGTATTCCGGCGGGCATGCCTGTTCGAGCGTCATTTCAACCCTCAAGCCTCGGCTTGGTGTTGGGGCGCCCGGGCCCTCCGCGGCCCGGGGCCCCCAAGTTCATCGGCGGGCTCGTCGGTTCACTGAGCGCAGTAAAACGCG…	Eukaryota	Fungi	Ascomycota	Pezizomycotina	Sordariomycetes	Sordariomycetidae	NA	Magnaporthales	NA	NA	NA	Pyriculariaceae	Pyricularia	Pyricularia oryzae	Kenya	0	37.9
NCBI	MN202902	NA	AGGGATCATTACTGAGTTGAAAAACTCCAACCCCTGTGAACATAACCTCCTGTCGTTGCTTCGGCGGGCACGCCCGCCGGAGGTTCAAAACTCTTATTTTTTTCAGTATCTCTGAGCCTAAAAGACAAATAATCAAAACTTTCAACAACGGATCTCTTGGTTCTGGCATCGATGAAGAACGCAGCGAAATGCGATAAGTAATGTGAATTGCAGAATTCAGTGAATCATCGAATCTTTGAACGCACATTGCGCCCGCCGGTATTCCGGCGGGCATGCCTGTTCGAGCGTCATTTCAACCCTCAAGCCTCGGCTTGGTGTTGGGGCGCCCGGGCCCTCCGCGGCCCGGGGCCCCCAAGTTCATCGGCGGGCTCGTCGGTTCACTGAGCGCAGTAAAACGCG…	Eukaryota	Fungi	Ascomycota	Pezizomycotina	Sordariomycetes	Sordariomycetidae	NA	Magnaporthales	NA	NA	NA	Pyriculariaceae	Pyricularia	Pyricularia oryzae	Kenya	0	37.9
NCBI	MN202901	NA	AGGGATCATTACTGAGTTGAAAAACTCCAACCCCTGTGAACATAACCTCCTGTCGTTGCTTCGGCGGGCACGCCCGCCGGAGGTTCAAAACTCTTATTTTTTTCAGTATCTCTGAGCCTAAAAGACAAATAATCAAAACTTTCAACAACGGATCTCTTGGTTCTGGCATCGATGAAGAACGCAGCGAAATGCGATAAGTAATGTGAATTGCAGAATTCAGTGAATCATCGAATCTTTGAACGCACATTGCGCCCGCCGGTATTCCGGCGGGCATGCCTGTTCGAGCGTCATTTCAACCCTCAAGCCTCGGCTTGGTGTTGGGGCGCCCGGGCCCTCCGCGGCCCGGGGCCCCCAAGTTCATCGGCGGGCTCGTCGGTTCACTGAGCGCAGTAAAACGCG…	Eukaryota	Fungi	Ascomycota	Pezizomycotina	Sordariomycetes	Sordariomycetidae	NA	Magnaporthales	NA	NA	NA	Pyriculariaceae	Pyricularia	Pyricularia oryzae	Kenya	0	37.9
NCBI	MN202900	NA	AGGGATCATTACTGAGTTGAAAAACTCCAACCCCTGTGAACATAACCTCCTGTCGTTGCTTCGGCGGGCACGCCCGCCGGAGGTTCAAAACTCTTATTTTTTTCAGTATCTCTGAGCCTAAAAGACAAATAATCAAAACTTTCAACAACGGATCTCTTGGTTCTGGCATCGATGAAGAACGCAGCGAAATGCGATAAGTAATGTGAATTGCAGAATTCAGTGAATCATCGAATCTTTGAACGCACATTGCGCCCGCCGGTATTCCGGCGGGCATGCCTGTTCGAGCGTCATTTCAACCCTCAAGCCTCGGCTTGGTGTTGGGGCGCCCGGGCCCTCCGCGGCCCGGGGCCCCCAAGTTCATCGGCGGGCTCGTCGGTTCACTGAGCGCAGTAAAACGCG…	Eukaryota	Fungi	Ascomycota	Pezizomycotina	Sordariomycetes	Sordariomycetidae	NA	Magnaporthales	NA	NA	NA	Pyriculariaceae	Pyricularia	Pyricularia oryzae	Kenya	0	37.9
NCBI	MN202899	NA	AGGGATCATTACTGAGTTGAAAAACTCCAACCCCTGTGAACATAACCTCCTGTCGTTGCTTCGGCGGGCACGCCCGCCGGAGGTTCAAAACTCTTATTTTTTTCAGTATCTCTGAGCCTAAAAGACAAATAATCAAAACTTTCAACAACGGATCTCTTGGTTCTGGCATCGATGAAGAACGCAGCGAAATGCGATAAGTAATGTGAATTGCAGAATTCAGTGAATCATCGAATCTTTGAACGCACATTGCGCCCGCCGGTATTCCGGCGGGCATGCCTGTTCGAGCGTCATTTCAACCCTCAAGCCTCGGCTTGGTGTTGGGGCGCCCGGGCCCTCCGCGGCCCGGGGCCCCCAAGTTCATCGGCGGGCTCGTCGGTTCACTGAGCGCAGTAAAACGCG…	Eukaryota	Fungi	Ascomycota	Pezizomycotina	Sordariomycetes	Sordariomycetidae	NA	Magnaporthales	NA	NA	NA	Pyriculariaceae	Pyricularia	Pyricularia oryzae	Kenya	0	37.9
NCBI	MN202898	NA	AGGGATCATTACTGAGTTGAAAAACTCCAACCCCTGTGAACATAACCTCCTGTCGTTGCTTCGGCGGGCACGCCCGCCGGAGGTTCAAAACTCTTATTTTTTTCAGTATCTCTGAGCCTAAAAGACAAATAATCAAAACTTTCAACAACGGATCTCTTGGTTCTGGCATCGATGAAGAACGCAGCGAAATGCGATAAGTAATGTGAATTGCAGAATTCAGTGAATCATCGAATCTTTGAACGCACATTGCGCCCGCCGGTATTCCGGCGGGCATGCCTGTTCGAGCGTCATTTCAACCCTCAAGCCTCGGCTTGGTGTTGGGGCGCCCGGGCCCTCCGCGGCCCGGGGCCCCCAAGTTCATCGGCGGGCTCGTCGGTTCACTGAGCGCAGTAAAACGCG…	Eukaryota	Fungi	Ascomycota	Pezizomycotina	Sordariomycetes	Sordariomycetidae	NA	Magnaporthales	NA	NA	NA	Pyriculariaceae	Pyricularia	Pyricularia oryzae	Kenya	0	37.9
This_study	OK185331	NA	ATCCTTCTGTAGGTGAACGCTTCGGAGGGATCATTACTGAGTTGAAAAACTCCAACCCCTGTGAACATAACCTCTGTCGTTGCTTCGGCGGGCACGCCCGCCGGAGGTTCAAAACTCTTATTTTTTTCAGTATCTCTGAGCCTAAAAGACAAATAATCAAAACTTTCAACAACGGATCTCTTGGTTCTGGCATCGATGAAGAACGCAGCGAAATGCGATAAGTAATGTGAATTGCAGAATTCAGTGAATCATCGAATCTTTGAACGCACATTGCGCCCGCCGGTATTCCGGCGGGCATGCCTGTTCGAGCGTCATTTCAACCCTCAAGCCTCGGCTTGGTGTTGGGGCGCCCGGGCCCTCCGCGGCCCGGGGCCCCCAAGTTCATCGGCGGGCTCGTCG…	Eukaryota	Fungi	Ascomycota	Pezizomycotina	Sordariomycetes	Sordariomycetidae	NA	Magnaporthales	NA	NA	NA	Pyriculariaceae	Pyricularia	Pyricularia oryzae	Mexico:Morelos	18.51	-99.04
This_study	OK185330	NA	CCTTTCTCGTAAGGGGGAACTGCGGAGGGATCATGGTGCTGAGTTGAAAAACTCCAACCCCTGTGAACATAACCTCTGTCGTTGCTTCGGCGGGCACGCCCGCCGGAGGTTCAAAACTCTTATTTTTTTCAGTATCTCTGAGCCTAAAAGACAAATAATCAAAACTTTCAACAACGGATCTCTTGGTTCTGGCATCGATGAAGAACGCAGCGAAATGCGATAAGTAATGTGAATTGCAGAATTCAGTGAATCATCGAATCTTTGAACGCACATTGCGCCCGCCGGTATTCCGGCGGGCATGCCTGTTCGAGCGTCATTTCAACCCTCAAGCCTCGGCTTGGTGTTGGGGCGCCCGGGCCCTCCGCGGCCCGGGGCCCCCAAGTTCATCGGCGGGCTCGT…	Eukaryota	Fungi	Ascomycota	Pezizomycotina	Sordariomycetes	Sordariomycetidae	NA	Magnaporthales	NA	NA	NA	Pyriculariaceae	Pyricularia	Pyricularia oryzae	Mexico:Morelos	18.51	-99.04
This_study	OK185329	NA	CCTTCTGTAGGTGAACCTGCGGAGGGATCATTACTGGGGGGTGGTGAAAAACTCCACCCCCTGTGACCATAACCTCTGTCGTTGCTTCGGCGGGCACGCCCGCCGGAGGTTCAAAACTCTTATTTTTTTCAGTATCTCTGAGCCTAAAAGACAAATAATCAAAACTTTCAACAACGGATCTCTTGGTTCTGGCATCGATGAAGAACGCAGCGAAATGCGATAAGTAATGTGAATTGCAGAATTCAGTGAATCATCGAATCTTTGAACGCACATTGCGCCCGCCGGTATTCCGGCGGGCATGCCTGTTCGAGCGTCATTTCAACCCTCAAGCCTCGGCTTGGTGTTGGGGCGCCCGGGCCCTCCGCGGCCCGGGGCCCCCAAGTTCATCGGCGGGCTCGT…	Eukaryota	Fungi	Ascomycota	Pezizomycotina	Sordariomycetes	Sordariomycetidae	NA	Magnaporthales	NA	NA	NA	Pyriculariaceae	Pyricularia	Pyricularia oryzae	Mexico:Morelos	18.51	-99.04
This_study	OK185328	NA	TCCCTCCGTAGGTGAACCTGCGGAGGGATCATTACGTTGGGAGGTTTGAAATACTCCAACCCCTGTGAACATAACCTCTGTCGTTGCTTCGGCGGGCACGCCCGCCGGAGGTTCAAAACTCTTATTTTTTTCAGTATCTCTGAGCCTAAAAGACAAATAATCAAAACTTTCAACAACGGATCTCTTGGTTCTGGCATCGATGAAGAACGCAGCGAAATGCGATAAGTAATGTGAATTGCAGAATTCAGTGAATCATCGAATCTTTGAACGCACATTGCGCCCGCCGGTATTCCGGCGGGCATGCCTGTTCGAGCGTCATTTCAACCCTCAAGCCTCGGCTTGGTGTTGGGGCGCCCGGGCCCTCCGCGGCCCGGGGCCCCCAAGTTCATCGGCGGGCTC…	Eukaryota	Fungi	Ascomycota	Pezizomycotina	Sordariomycetes	Sordariomycetidae	NA	Magnaporthales	NA	NA	NA	Pyriculariaceae	Pyricularia	Pyricularia oryzae	Mexico:Morelos	18.51	-99.04
This_study	OK185327	NA	TCCTTCTGTAGGGTGAACCTGCGGAGGGATCATTACGTGGGGGGTTGAAAAACTCCAACCCCTGTGAACATAACCTCTGTCGTTGCTTCGGCGGGCACGCCCGCCGGAGGTTCAAAACTCTTATTTTTTTCAGTATCTCTGAGCCTAAAAGACAAATAATCAAAACTTTCAACAACGGATCTCTTGGTTCTGGCATCGATGAAGAACGCAGCGAAATGCGATAAGTAATGTGAATTGCAGAATTCAGTGAATCATCGAATCTTTGAACGCACATTGCGCCCGCCGGTATTCCGGCGGGCATGCCTGTTCGAGCGTCATTTCAACCCTCAAGCCTCGGCTTGGTGTTGGGGCGCCCGGGCCCTCCGCGGCCCGGGGCCCCCAAGTTCATCGGCGGGCTCG…	Eukaryota	Fungi	Ascomycota	Pezizomycotina	Sordariomycetes	Sordariomycetidae	NA	Magnaporthales	NA	NA	NA	Pyriculariaceae	Pyricularia	Pyricularia oryzae	Mexico:Morelos	18.51	-99.04
This_study	OK185326	NA	CCCTCTGTAGGGTGAACCTGCGGAGGGATCAGTTGGTGGGTTGAAATCCTCCAACCCCTGTGAACATAACCTCTGTCGTTGCTTCGGCGGGCACGCCCGCCGGAGGTTCAAAACTCTTATTTTTTTCAGTATCTCTGAGCCTAAAAGACAAATAATCAAAACTTTCAACAACGGATCTCTTGGTTCTGGCATCGATGAAGAACGCAGCGAAATGCGATAAGTAATGTGAATTGCAGAATTCAGTGAATCATCGAATCTTTGAACGCACATTGCGCCCGCCGGTATTCCGGCGGGCATGCCTGTTCGAGCGTCATTTCAACCCTCAAGCCTCGGCTTGGTGTTGGGGCGCCCGGGCCCTCCGCGGCCCGGGGCCCCCAAGTTCATCGGCGGGCTCGTCGG…	Eukaryota	Fungi	Ascomycota	Pezizomycotina	Sordariomycetes	Sordariomycetidae	NA	Magnaporthales	NA	NA	NA	Pyriculariaceae	Pyricularia	Pyricularia oryzae	Mexico:Morelos	18.51	-99.04
This_study	OK185325	NA	CCCTTTTTTGGGGTACCTCCAACCCCTGTGAACATACCCTCTGTCGTTGCTTCGGCGGGCACGCCCGCCGGAGGTTCAAAACTCTTATTTTTTTCAGTATCTCTGAGCCTAAAAGACAAAAAATCAAAACTTTCAACAACGGATCTCTTGGTTCTGGCATCGATGAAGAACGCAGCGAAATGCGATAAGTAATGTGAATTGCGAAATTCAGTGAATCATCGAATCTTTGAACGCACATTGCGCCCGCCGGTATTCCGGCGGGCATGCCTGTTCGAGCGTCATTTCAACCCTCAAACCTCCGCTTGGTGTTGGGGCGCCCGGGCCCTCCGCGGCCCGGGGCCCCCAAGTTCATCGGCGGGGTCGTCGGTACACTGAGCGCAGTAAAACGCGGTAAAACGC…	Eukaryota	Fungi	Ascomycota	Pezizomycotina	Sordariomycetes	Sordariomycetidae	NA	Magnaporthales	NA	NA	NA	Pyriculariaceae	Pyricularia	Pyricularia oryzae	Mexico:Morelos	18.51	-99.04
This_study	OK185324	NA	CCCTTTGTAGGTGAACCTGCGGAGGGATTTTTTTTGAGTTGAATACCTCCAACCCCTGTGAACATAACCTCTGTCGTTGCTTCGGCGGGCACGCCCGCCGGAGGTTCAAAACTCTTATTTTTTTCAGTATCTCTGAGCCTAAAAGACAAATAATCAAAACTTTCAACAACGGATCTCTTGGTTCTGGCATCGATGAAGAACGCAGCGAAATGCGATAAGTAATGTGAATTGCAGAATTCAGTGAATCATCGAATCTTTGAACGCACATTGCGCCCGCCGGTATTCCGGCGGGCATGCCTGTTCGAGCGTCATTTCAACCCTCAAGCCTCGGCTTGGTGTTGGGGCGCCCGGGCCCTCCGCGGCCCGGGGCCCCCAAGTTCATCGGCGGGCTCGTCGGTA…	Eukaryota	Fungi	Ascomycota	Pezizomycotina	Sordariomycetes	Sordariomycetidae	NA	Magnaporthales	NA	NA	NA	Pyriculariaceae	Pyricularia	Pyricularia oryzae	Mexico:Morelos	18.51	-99.04
This_study	OK185323	NA	ATCCCTCTGTAGGTGAACCTGCGGAGGGATCATTAGTGGGTTTGAAATCCTCCAACCCCTGTGAACATAACCTCTGTCGTTGCTTCGGCGGGCACGCCCGCCGGAGGTTCAAAACTCTTATTTTTTTCAGTATCTCTGAGCCTAAAAGACAAATAATCAAAACTTTCAACAACGGATCTCTTGGTTCTGGCATCGATGAAGAACGCAGCGAAATGCGATAAGTAATGTGAATTGCAGAATTCAGTGAATCATCGAATCTTTGAACGCACATTGCGCCCGCCGGTATTCCGGCGGGCATGCCTGTTCGAGCGTCATTTCAACCCTCAAGCCTCGGCTTGGTGTTGGGGCGCCCGGGCCCTCCGCGGCCCGGGGCCCCCAAGTTCATCGGCGGGCTCGTCG…	Eukaryota	Fungi	Ascomycota	Pezizomycotina	Sordariomycetes	Sordariomycetidae	NA	Magnaporthales	NA	NA	NA	Pyriculariaceae	Pyricularia	Pyricularia oryzae	Mexico:Morelos	18.51	-99.04
This_study	OK185322	NA	ATCCTTCTGTAGGGTGAACCTGCGGAGGGATCATTGGTGGGTTGAAATACTCCAACCCCTGTGAACATAACCTCTGTCGTTGCTTCGGCGGGCACGCCCGCCGGAGGTTCAAAACTCTTATTTTTTTCAGTATCTCTGAGCCTAAAAGACAAATAATCAAAACTTTCAACAACGGATCTCTTGGTTCTGGCATCGATGAAGAACGCAGCGAAATGCGATAAGTAATGTGAATTGCAGAATTCAGTGAATCATCGAATCTTTGAACGCACATTGCGCCCGCCGGTATTCCGGCGGGCATGCCTGTTCGAGCGTCATTTCAACCCTCAAGCCTCGGCTTGGTGTTGGGGCGCCCGGGCCCTCCGCGGCCCGGGGCCCCCAAGTTCATCGGCGGGCTCGTCG…	Eukaryota	Fungi	Ascomycota	Pezizomycotina	Sordariomycetes	Sordariomycetidae	NA	Magnaporthales	NA	NA	NA	Pyriculariaceae	Pyricularia	Pyricularia oryzae	Mexico:Morelos	18.51	-99.04
This_study	OK185321	NA	TGCTGTGTTGAAATCCTCCAACCCCTGTGAACATAACCTCTGTCGTTGCTTCGGCGGGCACGCCCGCCGGAGGTTCAAAACTCTTATTTTTTTCAGTATCTCTGAGCCTAAAAGACAAATAATCAAAACTTTCAACAACGGATCTCTTGGTTCTGGCATCGATGAAGAACGCAGCGAAATGCGATAAGTAATGTGAATTGCAGAATTCAGTGAATCATCGAATCTTTGAACGCACATTGCGCCCGCCGGTATTCCGGCGGGCATGCCTGTTCGAGCGTCATTTCAACCCTCAAGCCTCGGCTTGGTGTTGGGGCGCCCGGGCCCTCCGCGGCCCGGGGCCCCCAAGTTCATCGGCGGGCTCGTCGGTACACTGAGCGCAGTAAAACGCGGTAAAACGCG…	Eukaryota	Fungi	Ascomycota	Pezizomycotina	Sordariomycetes	Sordariomycetidae	NA	Magnaporthales	NA	NA	NA	Pyriculariaceae	Pyricularia	Pyricularia oryzae	Mexico:Morelos	18.51	-99.04
This_study	OK185320	NA	TTGATGTACTCCAACCCCTGTGAACATAACCTCTGTCGTTGCTTCGGCGGGCACGCCCGCCGGAGGTTCAAAACTCTTATTTTTTTCAGTATCTCTGAGCCTAAAAGACAAATAATCAAAACTTTCAACAACGGATCTCTTGGTTCTGGCATCGATGAAGAACGCAGCGAAATGCGATAAGTAATGTGAATTGCAGAATTCAGTGAATCATCGAATCTTTGAACGCACATTGCGCCCGCCGGTATTCCGGCGGGCATGCCTGTTCGAGCGTCATTTCAACCCTCAAGCCTCGGCTTGGTGTTGGGGCGCCCGGGCCCTCCGCGGCCCGGGGCCCCCAAGTTCATCGGCGGGCTCGTCGGTACACTGAGCGCAGTAAAACGCGGTAAAACGCGAACCTCG…	Eukaryota	Fungi	Ascomycota	Pezizomycotina	Sordariomycetes	Sordariomycetidae	NA	Magnaporthales	NA	NA	NA	Pyriculariaceae	Pyricularia	Pyricularia oryzae	Mexico:Morelos	18.51	-99.04
This_study	OK185319	NA	TTGAAAACCTCCAACCCCTGTGAACATAACCTCTGTCGTTGCTTCGGCGGGCACGCCCGCCGGAGGTTCAAAACTCTTATTTTTTTCAGTATCTCTGAGCCTAAAAGACAAATAATCAAAACTTTCAACAACGGATCTCTTGGTTCTGGCATCGATGAAGAACGCAGCGAAATGCGATAAGTAATGTGAATTGCAGAATTCAGTGAATCATCGAATCTTTGAACGCACATTGCGCCCGCCGGTATTCCGGCGGGCATGCCTGTTCGAGCGTCATTTCAACCCTCAAGCCTCGGCTTGGTGTTGGGGCGCCCGGGCCCTCCGCGGCCCGGGGCCCCCAAGTTCATCGGCGGGCTCGTCGGTACACTGAGCGCAGTAAAACGCGGTAAAACGCGAACCTCG…	Eukaryota	Fungi	Ascomycota	Pezizomycotina	Sordariomycetes	Sordariomycetidae	NA	Magnaporthales	NA	NA	NA	Pyriculariaceae	Pyricularia	Pyricularia oryzae	Mexico:Morelos	18.51	-99.04
This_study	OK185318	NA	CCTTCTGTAGGTGAACCTGCGGAGGGATCAGGTTGCTGAGTTGAAATACTCCAACCCCTGTGAACATAACCTCTGTCGTTGCTTCGGCGGGCACGCCCGCCGGAGGTTCAAAACTCTTATTTTTTTCAGTATCTCTGAGCCTAAAAGACAAATAATCAAAACTTTCAACAACGGATCTCTTGGTTCTGGCATCGATGAAGAACGCAGCGAAATGCGATAAGTAATGTGAATTGCAGAATTCAGTGAATCATCGAATCTTTGAACGCACATTGCGCCCGCCGGTATTCCGGCGGGCATGCCTGTTCGAGCGTCATTTCAACCCTCAAGCCTCGGCTTGGTGTTGGGGCGCCCGGGCCCTCCGCGGCCCGGGGCCCCCAAGTTCATCGGCGGGCTCGTCGG…	Eukaryota	Fungi	Ascomycota	Pezizomycotina	Sordariomycetes	Sordariomycetidae	NA	Magnaporthales	NA	NA	NA	Pyriculariaceae	Pyricularia	Pyricularia oryzae	Mexico:Morelos	18.51	-99.04
This_study	OK185317	NA	TCCTTTTCTGTTAGGGGGAACTGCGGAGGGATCAGGTTACTGGGTTGAAAAGCTCCAACCCCTGTGAACATAACCTCTGTCGTTGCTTCGGCGGGCACGCCCGCCGGAGGTTCAAAACTCTTATTTTTTTCAGTATCTCTGAGCCTAAAAGACAAATAATCAAAACTTTCAACAACGGATCTCTTGGTTCTGGCATCGATGAAGAACGCAGCGAAATGCGATAAGTAATGTGAATTGCAGAATTCAGTGAATCATCGAATCTTTGAACGCACATTGCGCCCGCCGGTATTCCGGCGGGCATGCCTGTTCGAGCGTCATTTCAACCCTCAAGCCTCGGCTTGGTGTTGGGGCGCCCGGGCCCTCCGCGGCCCGGGGCCCCCAAGTTCATCGGCGGGCTCG…	Eukaryota	Fungi	Ascomycota	Pezizomycotina	Sordariomycetes	Sordariomycetidae	NA	Magnaporthales	NA	NA	NA	Pyriculariaceae	Pyricularia	Pyricularia oryzae	Mexico:Morelos	18.51	-99.04
This_study	OK185316	NA	GTTGAAATACTCCAACCCCTGTGAACATAACCTCTGTCGTTGCTTCGGCGGGCACGCCCGCCGGAGGTTCAAAACTCTTATTTTTTTCAGTATCTCTGAGCCTAAAAGACAAATAATCAAAACTTTCAACAACGGATCTCTTGGTTCTGGCATCGATGAAGAACGCAGCGAAATGCGATAAGTAATGTGAATTGCAGAATTCAGTGAATCATCGAATCTTTGAACGCACATTGCGCCCGCCGGTATTCCGGCGGGCATGCCTGTTCGAGCGTCATTTCAACCCTCAAGCCTCGGCTTGGTGTTGGGGCGCCCGGGCCCTCCGCGGCCCGGGGCCCCCAAGTTCATCGGCGGGCTCGTCGGTACACTGAGCGCAGTAAAACGCGGTAAAACGCGAACCTC…	Eukaryota	Fungi	Ascomycota	Pezizomycotina	Sordariomycetes	Sordariomycetidae	NA	Magnaporthales	NA	NA	NA	Pyriculariaceae	Pyricularia	Pyricularia oryzae	Mexico:Morelos	18.51	-99.04
This_study	OK185299	NA	GGGTTGAAAATCTCCAACCCCTGTGAACATAACCTCTGTCGTTGCTTCGGCGGGCACGCCCGCCGGAGGTTCAAAACTCTTATTTTTTTCAGTATCTCTGAGCCTAAAAGACAAATAATCAAAACTTTCAACAACGGATCTCTTGGTTCTGGCATCGATGAAGAACGCAGCGAAATGCGATAAGTAATGTGAATTGCAGAATTCAGTGAATCATCGAATCTTTGAACGCACATTGCGCCCGCCGGTATTCCGGCGGGCATGCCTGTTCGAGCGTCATTTCAACCCTCAAGCCTCGGCTTGGTGTTGGGGCGCCCGGGCCCTCCGCGGCCCGGGGCCCCCAAGTTCATCGGCGGGCTCGTCGGTACACTGAGCGCAGTAAAACGCGGTAAAACGCGAACC…	Eukaryota	Fungi	Ascomycota	Pezizomycotina	Sordariomycetes	Sordariomycetidae	NA	Magnaporthales	NA	NA	NA	Pyriculariaceae	Pyricularia	Pyricularia oryzae	Mexico:Morelos	18.92	-99.03
This_study	OK185298	NA	CCTTCTGTAGGTGAACCTGCGGAGGGATGCATTCCTGAGTGTGAAAAACTCCAACCCCTGTGAACATAACCTCTGTCGTTGCTTCGGCGGGCACGCCCGCCGGAGGTTCAAAACTCTTATTTTTTTCAGTATCTCTGAGCCTAAAAGACAAATAATCAAAACTTTCAACAACGGATCTCTTGGTTCTGGCATCGATGAAGAACGCAGCGAAATGCGATAAGTAATGTGAATTGCAGAATTCAGTGAATCATCGAATCTTTGAACGCACATTGCGCCCGCCGGTATTCCGGCGGGCATGCCTGTTCGAGCGTCATTTCAACCCTCAAGCCTCGGCTTGGTGTTGGGGCGCCCGGGCCCTCCGCGGCCCGGGGCCCCCAAGTTCATCGGCGGGCTCGTCGG…	Eukaryota	Fungi	Ascomycota	Pezizomycotina	Sordariomycetes	Sordariomycetidae	NA	Magnaporthales	NA	NA	NA	Pyriculariaceae	Pyricularia	Pyricularia oryzae	Mexico:Morelos	18.92	-99.03
This_study	OK185297	NA	CCTTCCGTAGGTGAACCTGCGGAGGGATCATTGGGTGGGTTGAATATCTCCAACCCCTGTGAACATAACCTCTGTCGTTGCTTCGGCGGGCACGCCCGCCGGAGGTTCAAAACTCTTATTTTTTTCAGTATCTCTGAGCCTAAAAGACAAATAATCAAAACTTTCAACAACGGATCTCTTGGTTCTGGCATCGATGAAGAACGCAGCGAAATGCGATAAGTAATGTGAATTGCAGAATTCAGTGAATCATCGAATCTTTGAACGCACATTGCGCCCGCCGGTATTCCGGCGGGCATGCCTGTTCGAGCGTCATTTCAACCCTCAAGCCTCGGCTTGGTGTTGGGGCGCCCGGGCCCTCCGCGGCCCGGGGCCCCCAAGTTCATCGGCGGGCTCGTCGGT…	Eukaryota	Fungi	Ascomycota	Pezizomycotina	Sordariomycetes	Sordariomycetidae	NA	Magnaporthales	NA	NA	NA	Pyriculariaceae	Pyricularia	Pyricularia oryzae	Mexico:Morelos	18.92	-99.03
This_study	OK185296	NA	TCCCTCTGTAGGTGAACCTGCGGAGGGATCATTACTTGTTTTGTTTATACTCCACCCCCTGTGAACATATCCTCTGTCGTTGCTTCGGCGGGCACGCCCGCCGGAGGTTCAAAACTCTTATTTTTTTCAGTATCTCTGAGCCTAAAAGACAAATAATCAAAACTTTCAACAACGGATCTCTTGGTTCTGGCATCGATGAAGAACGCAGCGAAATGCGATAAGTAATGTGAATTGCAGAATTCAGTGAATCATCGAATCTTTGAACGCACATTGCGCCCGCCGGTATTCCGGCGGGCATGCCTGTTCGAGCGTCATTTCAACCCTCAAGCCTCGGCTTGGTGTTGGGGCGCCCGGGCCCTCCGCGGCCCGGGGCCCCCAAGTTCATCGGCGGGCTCGTCG…	Eukaryota	Fungi	Ascomycota	Pezizomycotina	Sordariomycetes	Sordariomycetidae	NA	Magnaporthales	NA	NA	NA	Pyriculariaceae	Pyricularia	Pyricularia oryzae	Mexico:Morelos	18.92	-99.03
This_study	OK185295	NA	TCCCTCTGTAGGTGAACCTGCGGAGGGATCGATTACTGAGTTGAAAAACTCCAACCCCTGTGAACATAACCTCTGTCGTTGCTTCGGCGGGCACGCCCGCGGGAGGTTCAAAACTCTTATTTTTTTCAGTATCTCTGAGCCTAGGAGACAAATAATCAAAACTTTCAACAACGGATCTCTTGGTTCTGGCATGGATGAAGAACGCAGCGAAATGGGATAAGTAATGTGAATTGCAGAATTCGGTGAATCATCGGATCTTTGAACGCACATTGCGCCCGCCGGTATTCCGGCGGGCATGCCTGTTCGAGCGTCATTTCAACCCTCAAGCCTCGGCTTGGTGTTGGGGCGCCCGGGCCCTCCGCGGCCCGGGGCCCCCAAGTTCATCGGCGGGCTCGTCGG…	Eukaryota	Fungi	Ascomycota	Pezizomycotina	Sordariomycetes	Sordariomycetidae	NA	Magnaporthales	NA	NA	NA	Pyriculariaceae	Pyricularia	Pyricularia oryzae	Mexico:Morelos	18.92	-99.03
This_study	OK185294	NA	TCCCTCTGTAGGGGTGAACCTGCGGAGGGATCAGGTTCCTGAGTTGAAATACTCCAACCCCTGTGAACATAACCTCTGTCGTTGCTTCGGCGGGCACGCCCGCCGGAGGTTCAAAACTCTTATTTTTTTCAGTATCTCTGAGCCTAAAAGACAAATAATCAAAACTTTCAACAACGGATCTCTTGGTTCTGGCATCGATGAAGAACGCAGCGAAATGCGATAAGTAATGTGAATTGCAGAATTCAGTGAATCATCGAATCTTTGAACGCACATTGCGCCCGCCGGTATTCCGGCGGGCATGCCTGTTCGAGCGTCATTTCAACCCTCAAGCCTCGGCTTGGTGTTGGGGCGCCCGGGCCCTCCGCGGCCCGGGGCCCCCAAGTTCATCGGCGGGCTCGT…	Eukaryota	Fungi	Ascomycota	Pezizomycotina	Sordariomycetes	Sordariomycetidae	NA	Magnaporthales	NA	NA	NA	Pyriculariaceae	Pyricularia	Pyricularia oryzae	Mexico:Morelos	18.92	-99.03
This_study	OK185293	NA	AAAAACTCCACCCCCTGTGAACATACCCTCTGTCGTTGCTTCGGCGGGCACGCCCGCGGGAGGTTCAAAACTCTTATTTTTTTCAGTATCTCTGAGCCTAAAAGACAAATAATCAAAACTTTCAACAACGGATCTCTTGGTTCTGGCATCGGTGAAGAACGCAGCGAAATGCGATAAGTAATGTGAATTGCAGAATTCAGTGAATCATCTAATCTTTGAACGCACATTGCGCCCGCCGGTATTCCGGCGGGCATGCCTGTTCGAGCGTCATTTCAACCCTCAAGCCTCGGCTTGGTGTTGGGGCGCCCGGGCCCTCCGCGGCCCGGGGCCCCCAAGTTCATCGGCGGGCTCGTCGGTACACTGAGCGCAGTAAAACGCGGTAAAACGCGAACCTCGTTC…	Eukaryota	Fungi	Ascomycota	Pezizomycotina	Sordariomycetes	Sordariomycetidae	NA	Magnaporthales	NA	NA	NA	Pyriculariaceae	Pyricularia	Pyricularia oryzae	Mexico:Morelos	18.92	-99.03
This_study	OK185292	NA	AGTTGAAGTCCTCCAACCCCTGTGAACATAACCTCTGTCGTTGCTTCGGCGGGCACGCCCGCCGGAGGTTCAAAACTCTTATTTTTTTCAGTATCTCTGAGCCTAAAAGACAAATAATCAAAACTTTCAACAACGGATCTCTTGGTTCTGGCATCGATGAAGAACGCAGCGAAATGCGATAAGTAATGTGAATTGCAGAATTCAGTGAATCATCGAATCTTTGAACGCACATTGCGCCCGCCGGTATTCCGGCGGGCATGCCTGTTCGAGCGTCATTTCAACCCTCAAGCCTCGGCTTGGTGTTGGGGCGCCCGGGCCCTCCGCGGCCCGGGGCCCCCAAGTTCATCGGCGGGCTCGTCGGTACACTGAGCGCAGTAAAACGCGGTAAAACGCGAACCT…	Eukaryota	Fungi	Ascomycota	Pezizomycotina	Sordariomycetes	Sordariomycetidae	NA	Magnaporthales	NA	NA	NA	Pyriculariaceae	Pyricularia	Pyricularia oryzae	Mexico:Morelos	18.92	-99.03
This_study	OK185291	NA	TTCCGTAAGGTGAACCTGCGGAGGGATCATTACTGTGAGTTGAAATACTCCACCCCCTGTGAACATAACCTCTGTCGTTGCTTCGGCGGGCACGCCCGCCGGAGGTTCAAAACTCTTATTTTTTTCAGTATCTCTGAGCCTAAAAGACAAATAATCAAAACTTTCAACAACGGATCTCTTGGTTCTGGCATCGATGAAGAACGCAGCGAAATGCGATAAGTAATGTGAATTGCAGAATTCAGTGAATCATCGAATCTTTGAACGCACATTGCGCCCGCCGGTATTCCGGCGGGCATGCCTGTTCGAGCGTCATTTCAACCCTCAAGCCTCGGCTTGGTGTTGGGGCGCCCGGGCCCTCCGCGGCCCGGGGCCCCCAAGTTCATCGGCGGGCTCGTCGGT…	Eukaryota	Fungi	Ascomycota	Pezizomycotina	Sordariomycetes	Sordariomycetidae	NA	Magnaporthales	NA	NA	NA	Pyriculariaceae	Pyricularia	Pyricularia oryzae	Mexico:Morelos	18.92	-99.03
This_study	OK185290	NA	GAGTTGAGTAACTCCAACCCCTGTGAACATAACCTCTGTCGTTGCTTCGGCGGGCACGCCCGCCGGAGGTTCAAAACTCTTATTTTTTTCAGTATCTCTGAGCCTAAAAGACAAATAATCAAAACTTTCAACAACGGATCTCTTGGTTCTGGCATCGATGAAGAACGCAGCGAAATGCGATAAGTAATGTGAATTGCAGAATTCAGTGAATCATCGAATCTTTGAACGCACATTGCGCCCGCCGGTATTCCGGCGGGCATGCCTGTTCGAGCGTCATTTCAACCCTCAAGCCTCGGCTTGGTGTTGGGGCGCCCGGGCCCTCCGCGGCCCGGGGCCCCCAAGTTCATCGGCGGGCTCGTCGGTACACTGAGCGCAGTAAAACGCGGTAAAACGCGAACC…	Eukaryota	Fungi	Ascomycota	Pezizomycotina	Sordariomycetes	Sordariomycetidae	NA	Magnaporthales	NA	NA	NA	Pyriculariaceae	Pyricularia	Pyricularia oryzae	Mexico:Morelos	18.92	-99.03
This_study	MT785893	NA	TTCAGTATCTCTGAGCCTAAAAGACAAATAATTAAAACTTTCAACAACGGATCTCTTGGTTCTGGCATCGATGAAGAACGCAGCGAAATGCGATAAGTAATGTGAATTGCAGAATTCAGTGAATCATCGAATCTTTGAACGCACATTGCGCCCGCCGGTATTCCGGCGGGCATGCCTGTTCGAGCGTCATTTCAACCCTCAAGCCTCGGCTTGGTGTTGGGGCGCCCGGGCCCTCCGCGGCCCGGGGCCCCCAAGTTCATCGGCGGGCTCGTCGGTACACTGAGCGCAGTAAAACGCGGTAAAACGCGAACCTCGTTCGGATCGTCCCGGCGTGCTCCAGCCGCTAAACCCCCAATTTTTTAAAGGTTG	Eukaryota	Fungi	Ascomycota	Pezizomycotina	Sordariomycetes	Sordariomycetidae	NA	Magnaporthales	NA	NA	NA	Pyriculariaceae	Pyricularia	Pyricularia oryzae	Mexico:Morelos	18.4	-99.1
This_study	MT785892	NA	TTCAGTATCTCTGAGCCTAAAAGACAAATAATCAAAACATTCAACAACGGATCTCTTGGTTCTGGCATCGATGAAGAACGCAGCGAAATGCGATAAGTAATGTGAATTGCAGAATTCAGTGAATCATCGAATCTTTGAACGCACATTGCGCCCGCCGGTATTCCGGCGGGCATGCCTGTTCGAGCGTCATTTCAACCCTCAAGCCTCGGCTTGGTGTTGGGGCGCCCGGGCCCTCCGCGGCCCGGGGCCCCCAAGTTCATCGGCGGGCTCGTCGGTACACTGAGCGCAGTAAAACGCGGTAAAACGCGAACCTCGTTCGGATCGTCCCGGCGTGCTCCAGCCGCTAAACCCCCAATTTTTTAAAGGTTG	Eukaryota	Fungi	Ascomycota	Pezizomycotina	Sordariomycetes	Sordariomycetidae	NA	Magnaporthales	NA	NA	NA	Pyriculariaceae	Pyricularia	Pyricularia oryzae	Mexico:Morelos	18.4	-99.1
This_study	MT785891	NA	TTCAGTATCTCTGAGCCTAAAAGACAAATAATTTAAACTTTCAACAACGGATCTCTTGGTTCTGGCATCGATGAAGAACGCAGCGAAATGCGATAAGTAATGTGAATTGCAGAATTCAGTGAATCATCGAATCTTTGAACGCACATTGCGCCCGCCGGTATTCCGGCGGGCATGCCTGTTCGAGCGTCATTTCAACCCTCAAGCCTCGGCTTGGTGTTGGGGCGCCCGGGCCCTCCCCGGCCCGGGGCCCCCAAGTTCATCGGCGGGCTCGTCGGTACACTGAGCGCAGTAAAACGCGGTAAAACGCGAACCTCGTTCGGATCGCTCCCGGCGTGCTCCAGCCGCTAAACCCCAAATTTTTTAAAGGTTG	Eukaryota	Fungi	Ascomycota	Pezizomycotina	Sordariomycetes	Sordariomycetidae	NA	Magnaporthales	NA	NA	NA	Pyriculariaceae	Pyricularia	Pyricularia oryzae	Mexico:Morelos	18.5	-99
This_study	MT785890	NA	TTCAGTATCTCTGAGCCTAAAAGACAAATAATCAAAACTTTCAACAACGGATCTCTTGGTTCTGGCATCGATGAAGAACGCAGCGAAATGCGATAAGTAATGTGAATTGCAGAATTCAGTGAATCATCGAATCTTTGAACGCACATTGCGCCCGCCGGTATTCCGGCGGGCATGCCTGTTCGAGCGTCATTTCAACCCTCAAGCCTCGGCTTGGTGTTGGGGCGCCCGGGCCCTCCGCGGCCCGGGGCCCCCAAGTTCATCGGCGGGCTCGTCGGTACACTGAGCGCAGTAAAACGCGGTAAAACGCGAACCTCGTTCGGATCGTCCCGGCGTGCTCCAGCCGCTAAACCCCCAATTTTTTAAAGGTTG	Eukaryota	Fungi	Ascomycota	Pezizomycotina	Sordariomycetes	Sordariomycetidae	NA	Magnaporthales	NA	NA	NA	Pyriculariaceae	Pyricularia	Pyricularia oryzae	Mexico:Morelos	18.5	-99
This_study	MT785889	NA	TTCAGTATCTCTGAGCCTAAAAGACAAATAATTTAAACTTTCAACAACGGATCTCTTGGTTCTGGCATCGATGAAGAACGCAGCGAAATGCGATAAGTAATGTGAATTGCAGAATTCAGTGAATCATCGAATCTTTGAACGCACATTGCGCCCGCCGGTATTCCGGCGGGCATGCCTGTTCGAGCGTCATTTCAACCCTCAAGCCTCGGCTTGGTGTTGGGGCGCCCGGGCCCTCCGCGGCCCGGGGCCCCCAAGTTCATCGGCGGGCTCGTCGGTACACTGAGCGCAGTAAAACGCGGTAAAACGCGAACCTCGTTCGGATCGTCCCGGCGTGCTCCAGCCGCTAAACCCCCAATTTTTTAAAGGTTG	Eukaryota	Fungi	Ascomycota	Pezizomycotina	Sordariomycetes	Sordariomycetidae	NA	Magnaporthales	NA	NA	NA	Pyriculariaceae	Pyricularia	Pyricularia oryzae	Mexico:Morelos	18.5	-99
This_study	OK185337	NA	TCCTTCCGTAGGTGAACCTGCGGAGGGATCATTACTTTTGAAAAACTCCAACCCCTGTGAACATAACCTCTGTCGTTGCTTCGGCGGGCCAGCCCGCCGGAGGTTCCAAACTCTTTTTTATCTTCAGTATCTCTGAGCCTAAAAGACAAAATGATCAAAACTTTCAACAACGGATCTCTTGGTTCTGGCATCGATGAAGAACGCAGCGAAATGCGATAAGTAATGTGAATTGCAGAATTCAGTGAATCATCGAATCTTTGAACGCACATTGCGCCCGCCGGTATTCCGGCGGGCATGCCTGTTCGAGCGTCATTTCAACCCTCAAGCCTCGGCTTGGTGTTGGGGCGCCCGGGTCCCCCGCGGCCCGGGGCCCCCAAGTTCATCGGCGGGCTCGTCGGT…	Eukaryota	Fungi	Ascomycota	Pezizomycotina	Sordariomycetes	Sordariomycetidae	NA	Magnaporthales	NA	NA	NA	Pyriculariaceae	Pyricularia	Pyricularia pennisetigena	Mexico:Morelos	18.5	-99
This_study	OK185338	NA	CCTTCCGTAGGTGAACCTGCGGAGGGATCATTACTGATTTGAAAAACTCCAACCCCTGTGAACATAACCTCTGTCGTTGCTTCGGCGGGCCAGCCCGCCGGAGGTTCCAAACTCTTTTTTATCTTCAGTATCTCTGAGCCTAAAAGACAAAATGATCAAAACTTTCAACAACGGATCTCTTGGTTCTGGCATCGATGAAGAACGCAGCGAAATGCGATAAGTAATGTGAATTGCAGAATTCAGTGAATCATCGAATCTTTGAACGCACATTGCGCCCGCCGGTATTCCGGCGGGCATGCCTGTTCGAGCGTCATTTCAACCCTCAAGCCTCGGCTTGGTGTTGGGGCGCCCGGGTCCCCCGCGGCCCGGGGCCCCCAAGTTCATCGGCGGGCTCGTCGG…	Eukaryota	Fungi	Ascomycota	Pezizomycotina	Sordariomycetes	Sordariomycetidae	NA	Magnaporthales	NA	NA	NA	Pyriculariaceae	Pyricularia	Pyricularia pennisetigena	Mexico:Morelos	18.5	-99
This_study	OK185339	NA	TCCCTCTGTAGGTGAACCTGCGGAGGGATCATTACTGAGTTTGAAAAACTCCAACCCCTGTGAACATAACCTCTGTCGTTGCTTCGGCGGGCCAGCCCGCCGGAGGTTCCAAACTCTTTTTTATCTTCAGTATCTCTGAGCCTGAAAGACAAAATGATCAAAACTTTCAACAACGGATCTCTTGGTTCTGGGATCGATGAAGAACGCAGCGAAGTGCGATAAGTAATGTGAATTGCAGAATTCAGTGAATCATCGAATCTTTGAACGCACATTGCGCCCGCCGGTATTCCGGCGGGCATGCCTGTTCGAGCGTCATTTCAACCCTCAAGCCTCGGGTTGGTGTTGGGGCGCCCGGTTCGCCCGCGGCCCGGGGCCCCCAAGTTCATCGGCGGGCTCGTC…	Eukaryota	Fungi	Ascomycota	Pezizomycotina	Sordariomycetes	Sordariomycetidae	NA	Magnaporthales	NA	NA	NA	Pyriculariaceae	Pyricularia		Mexico:Morelos	18.5	-99
This_study	OK185340	NA	CCTTCTGTAGGTGAACCTGCGGAGGGATCATTACTGAGTTTGAAAAACTCCAACCCCTGTGAACATAACCTCTGTCGTTGCTTCGGCGGGCCAGCCCGCCGGAGGTTCCAAACTCTTTTTTATCTTCAGTATCTCTGAGCCTAAAAGACAAAATGATCAAAACTTTCAACAACGGATCTCTTGGTTCTGGCATCGATGAAGAACGCAGCGAAATGCGATAAGTAATGTGAATTGCAGAATTCAGTGAATCATCGAATCTTTGAACGCACATTGCGCCCGCCGGTATTCCGGCGGGCATGCCTGTTCGAGCGTCATTTCAACCCTCAAGCCTCGGCTTGGTGTTGGGGCGCCCGGGTCCCCCGCGGCCCGGGGCCCCCAAGTTCATCGGCGGGCTCGTCG…	Eukaryota	Fungi	Ascomycota	Pezizomycotina	Sordariomycetes	Sordariomycetidae	NA	Magnaporthales	NA	NA	NA	Pyriculariaceae	Pyricularia		Mexico:Morelos	18.5	-99
This_study	OK185315	NA	CCTTCCGTAGGTGAACCTGCGGAGGGATCGCTTTTTGAGTTTTGAAAAACTCCAACCCCTGTGAACCTTTCCTCTGTCGTTGCTTCGGCGGGCACGCCCGCCGGAGGGTCAAAACTCTTATTTTTTTCAGTATCTCTGAGCCTAAAAGACAAATAATCAAAACTTTCAACAACGGATCTCTTGGTTCTGGCATCGATGAAGAACGCAGCGAAATGCGATAAGTAATGTGAATTGCAGAATTCAGTGAATCATCGAATCTTTGAACGCACATTGCGCCCGCCGGTATTCCGGCGGGCATGCCTGTTCGAGCGTCATTTCAACCCTCAAGCCTCGGCTTGGTGTTGGGGCGCCCGGGCCCTCCGCGGCCCGGGGCCCCCAAGTTCATCGGCGGGCTCGTCG…	Eukaryota	Fungi	Ascomycota	Pezizomycotina	Sordariomycetes	Sordariomycetidae	NA	Magnaporthales	NA	NA	NA	Pyriculariaceae	Pyricularia	Pyricularia oryzae	Mexico:Tamaulipas	25.58	-98.16
This_study	OK185314	NA	TCCTTCCGTAGGTGAACCTGCGGAGGGATCGTTTCTGTTGTTGAAAAACTCCAACCCCTGTGAACATAACCTCTGTCGTTGCTTCGGCGGGCACGCCCGCCGGAGGTTCCAAACTCTTATTTTTTTCCGTATCTCTGAGCCTAAAAGACAAATAATCAAAACTTTCCACAACGGATCTCTTGGTTCTGGCATCTATGAAGAACGCAGCGAAATGCGATAAGTAATGTGAATTGCAGAATTCAGTGAATCATCGAATCTTTGAACGCACATTGCGCCCGCCGGTATTCGGGCGGGCATGCCTGTTCGAGCGTCATTTCCACCCTCAAGCCTCGGCTTGGTGTTGGGGCGCCCGGGCCCTCCGCGGCCCGGGGCCCCCAAGTTCATCGGCGGGGTCGTCGG…	Eukaryota	Fungi	Ascomycota	Pezizomycotina	Sordariomycetes	Sordariomycetidae	NA	Magnaporthales	NA	NA	NA	Pyriculariaceae	Pyricularia	Pyricularia oryzae	Mexico:Tamaulipas	25.58	-98.16
This_study	OK185313	NA	TCCTTCTGTAGGGGGGCCTGCGGAGGGATCATTACAGAGTCGAAAAACTCCAACCCCTGTGAGCATAACCTCTGTCGTTGCTTGGGCGGGCACGCCCGCCGGAGGTTCAAAACTCTTATTTTTTCAGTATCTCTGAGCCTAAAAGACAAATAACCAAAAATTTCAACAACGGATCTCTTGGTTCTGGCATCGATGAAGAACGCAGCGAAATACGTAAAGTAATGTGAATTGCAGAATGCAGTGAATCATCGAATCTTTGCAAGCACATTGCGCCCGCCGGTATTCCGGCGGGCATGCCTGTTCGAGCGTCATTTCAACCCTCAAGCCTCGGGTTGGTGTTGGGGCGCCCGGGCCCTCCGCGGCCCGGGGCCCCCAAGTTCATCGGCGGGCTCGTCGGTA…	Eukaryota	Fungi	Ascomycota	Pezizomycotina	Sordariomycetes	Sordariomycetidae	NA	Magnaporthales	NA	NA	NA	Pyriculariaceae	Pyricularia	Pyricularia oryzae	Mexico:Tamaulipas	25.58	-98.16
This_study	OK185312	NA	CCTCCCGTAAGGGGGAACTGCGGAGGGATCATTACTGTGAGTTGAAAAACTCCAACCCCTGTGAACATAACCTCTGTCGTTGCTTCGGCGGGCACGCCCGCCGGAGGTTCAAAACTCTTATTTTTTTCAGTATCTCTGAGCCTAAAAGACAAATAATCAAAACTTTCAACAACGGATCTCTTGGTTCTGGCATCGATGAAGAACGCAGCGAAATGCGATAAGTAATGTGAATTGCAGAATTCAGTGAATCATCGAATCTTTGAACGCACATTGCGCCCGCCGGTATTCCGGCGGGCATGCCTGTTCGAGCGTCATTTCAACCCTCAAGCCTCGGCTTGGTGTTGGGGCGCCCGGGCCCTCCGCGGCCCGGGGCCCCCAAGTTCATCGGCGGGCTCGTCG…	Eukaryota	Fungi	Ascomycota	Pezizomycotina	Sordariomycetes	Sordariomycetidae	NA	Magnaporthales	NA	NA	NA	Pyriculariaceae	Pyricularia	Pyricularia oryzae	Mexico:Tamaulipas	25.58	-98.16
This_study	OK185311	NA	CCTGCGGAGGGATCATTACTGAGTTGAAAAACTCCAACCCCTGTGAACATAACCTCTGTCGTTGCTTCGGCGGGCACGCCCGCCGGAGGTTCAAAACTCTTATTTTTTTCAGTATCTCTGAGCCTAAAAGACAAATAATCAAAACTTTCAACAACGGATCTCTTGGTTCTGGCATCGATGAAGAACGCAGCGAAATGCGATAAGTAATGTGAATTGCAGAATTCAGTGAATCATCGAATCTTTGAACGCACATTGCGCCCGCCGGTATTCCGGCGGGCATGCCTGTTCGAGCGTCATTTCAACCCTCAAGCCTCGGCTTGGTGTTGGGGCGCCCGGGCCCTCCGCGGCCCGGGGCCCCCAAGTTCATCGGCGGGCTCGTCGGTACACTGAGCGCAGTAA…	Eukaryota	Fungi	Ascomycota	Pezizomycotina	Sordariomycetes	Sordariomycetidae	NA	Magnaporthales	NA	NA	NA	Pyriculariaceae	Pyricularia	Pyricularia oryzae	Mexico:Tamaulipas	25.58	-98.16
This_study	OK185310	NA	TACTCCAACCCCTGTGAACATAACCTCTGTCGTTGCTTGGGCGGGCACGCCCGCCGGAGGTTCCAAACTCTTATTTTTTTCAGTATCTCTGAGCCTAAAAGACAAATAATCAAAACTTTCAACAACGGATCTCTTGGTTCTGGAATCGATGAAGAACGCAGCGAAATGCGATAAGTAATGTGAATTGCAGAATTCAGTGAATCATCGAATCTTTGAACGCACATTGCGCCCGCCGGTATTCCGGCGGGCATGCCTGTTCGAGCGTCATTTCCACCCTCCAGCCTCGGCTTGGTGTTGGGGCGCCCGGGCCCTCCGCGGCCCGGGGCCCCCAAGTTCATCGGCGGGCTCGTCGGTACACTGAGCGCAGTAAAACGCGGTAAAACGCGAACCTCGTTCGGA…	Eukaryota	Fungi	Ascomycota	Pezizomycotina	Sordariomycetes	Sordariomycetidae	NA	Magnaporthales	NA	NA	NA	Pyriculariaceae	Pyricularia	Pyricularia oryzae	Mexico:Tamaulipas	25.58	-98.16
This_study	OK185309	NA	ACCCCTCCCGTAAAGGGGGAACTGCGGAGGGATCAGTTCCTGAGTTGAAAAACTCCAACCCCTGTGAACATAACCTCTGTCGTTGCTTCGGCGGGCACGCCCGCCGGAGGTTCAAAACTCTTATTTTTTTCAGTATCTCTGAGCCTAAAAGACAAATAATCAAAACTTTCAACAACGGATCTCTTGGTTCTGGCATCGATGAAGAACGCAGCGAAATGCGATAAGTAATGTGAATTGCAGAATTCAGTGAATCATCGAATCTTTGAACGCACATTGCGCCCGCCGGTATTCCGGCGGGCATGCCTGTTCGAGCGTCATTTCAACCCTCAAGCCTCGGCTTGGTGTTGGGGCGCCCGGGCCCTCCGCGGCCCGGGGCCCCCAAGTTCATCGGCGGGCTCG…	Eukaryota	Fungi	Ascomycota	Pezizomycotina	Sordariomycetes	Sordariomycetidae	NA	Magnaporthales	NA	NA	NA	Pyriculariaceae	Pyricularia	Pyricularia oryzae	Mexico:Tamaulipas	25.58	-98.16
This_study	OK185308	NA	CCTTCTGTAGGTGAACCTGCGGAGGGATCATTTTTGGGGTTGAAAACCTCCACCCCCTGTGAGCCTAACCTCTGTCGTTGCTTCGGCGGGCACGCCCGCCGGAGGTTCAAAACTCTTATTTTTTTCAGTATCTCTGAGCCTAAAAGACAAATAATCAAAACTTTCAACAACGGATCTCTTGGTTCTGGCATCGATGAAGAACGCAGCGAAATGCGATAAGTAATGTGAATTGCAGAATTCAGTGAATCATCGAATCTTTGAACGCACATTGCGCCCGCCGGTATTCCGGCGGGCATGCCTGTTCGAGCGTCATTTCAACCCTCAAGCCTCGGCTTGGTGTTGGGGCGCCCGGGCCCTCCGCGGCCCGGGGCCCCCAAGTTCATCGGCGGGCTCGTCGGT…	Eukaryota	Fungi	Ascomycota	Pezizomycotina	Sordariomycetes	Sordariomycetidae	NA	Magnaporthales	NA	NA	NA	Pyriculariaceae	Pyricularia	Pyricularia oryzae	Mexico:Tamaulipas	25.58	-98.16
This_study	OK185307	NA	TTGAATGCCTCCAACCCCTGTGAACATAACCTCTGTCGTTGCTTCGGCGGGCACGCCCGCCGGAGGTTCAAAACTCTTATTTTTTTCAGTATCTCTGAGCCTAAAAGACAAATAATCAAAACTTTCAACAACGGATCTCTTGGTTCTGGCATCGATGAAGAACGCAGCGAAATGCGATAAGTAATGTGAATTGCAGAATTCAGTGAATCATCGAATCTTTGAACGCACATTGCGCCCGCCGGTATTCCGGCGGGCATGCCTGTTCGAGCGTCATTTCAACCCTCAAGCCTCGGCTTGGTGTTGGGGCGCCCGGGCCCTCCGCGGCCCGGGGCCCCCAAGTTCATCGGCGGGCTCGTCGGTACACTGAGCGCAGTAAAACGCGGTAAAACGCGAACCTCG…	Eukaryota	Fungi	Ascomycota	Pezizomycotina	Sordariomycetes	Sordariomycetidae	NA	Magnaporthales	NA	NA	NA	Pyriculariaceae	Pyricularia	Pyricularia oryzae	Mexico:Tamaulipas	25.58	-98.16
This_study	OK185306	NA	TTTTCGTAGGGGGACCTGCGGAGGGATCGTTTTTGTGTTTTGAAAACCTCCAACCCCTGTGAACCTAACCTCTGTCGTTGCTTCGGCGGGCACGCCCGCCGGAGGTTCAAAACTCTTATTTTTTTCAGTATCTCTGAGCCTAAAAGACAAATAATCAAAACTTTCAACAACGGATCTCTTGGTTCTGGCATCGATGAAGAACGCAGCGAAATGCGATAAGTAATGTGAATTGCAGAATTCAGTGAATCATCGAATCTTTGAACGCACATTGCGCCCGCCGGTATTCCGGCGGGCATGCCTGTTCGAGCGTCATTTCAACCCTCAAGCCTCGGCTTGGTGTTGGGGCGCCCGGGCCCTCCGCGGCCCGGGGCCCCCCAGTTCATCGGCGGGCTCGTCGGT…	Eukaryota	Fungi	Ascomycota	Pezizomycotina	Sordariomycetes	Sordariomycetidae	NA	Magnaporthales	NA	NA	NA	Pyriculariaceae	Pyricularia	Pyricularia oryzae	Mexico:Tamaulipas	25.58	-98.16
This_study	OK185305	NA	TCCTTCTGTAGGTGAACCTGCGGAGGGATGCATTTTTGGGTGTGAAAAACTCCAACCCCTGTGAACATAACCTCTGTCGTTGCTTCGGCGGGCACGCCCGCCGGAGGTTCAAAACTCTTATTTTTTTCAGTATCTCTGAGCCTAAAAGACAAATAATCAAAACTTTCAACAACGGATCTCTTGGTTCTGGCATCGATGAAGAACGCAGCGAAATGCGATAAGTAATGTGAATTGCAGAATTCAGTGAATCATCGAATCTTTGAACGCACATTGCGCCCGCCGGTATTCCGGCGGGCATGCCTGTTCGAGCGTCATTTCAACCCTCAAGCCTCGGCTTGGTGTTGGGGCGCCCGGGCCCTCCGCGGCCCGGGGCCCCCAAGTTCATCGGCGGGCTCGTCG…	Eukaryota	Fungi	Ascomycota	Pezizomycotina	Sordariomycetes	Sordariomycetidae	NA	Magnaporthales	NA	NA	NA	Pyriculariaceae	Pyricularia	Pyricularia oryzae	Mexico:Tamaulipas	25.58	-98.16
This_study	OK185304	NA	CCTTCCGTAGGTGAACCTGCGGAGGGATCTTTTGGTGGGGTTGAAAACCTCCAACCCCTGTGAACATAACCTCTGTCGTTGCTTCGGCGGGCACGCCCGCCGGAGGTTCAAAACTCTTATTTTTTTCAGTATCTCTGAGCCTAAAAGACAAATAATCAAAACTTTCAACAACGGATCTCTTGGTTCTGGCATCGATGAAGAACGCAGCGAAATGCGATAAGTAATGTGAATTGCAGAATTCAGTGAATCATCGAATCTTTGAACGCACATTGCGCCCGCCGGTATTCCGGCGGGCATGCCTGTTCGAGCGTCATTTCAACCCTCAAGCCTCGGCTTGGTGTTGGGGCGCCCGGGCCCTCCGCGGCCCGGGGCCCCCAAGTTCATCGGCGGGCTCGTCGG…	Eukaryota	Fungi	Ascomycota	Pezizomycotina	Sordariomycetes	Sordariomycetidae	NA	Magnaporthales	NA	NA	NA	Pyriculariaceae	Pyricularia	Pyricularia oryzae	Mexico:Tamaulipas	25.58	-98.16
This_study	OK185303	NA	CCTTCCGTAGGTGAACCTGCGGAGGGATCATTACTGGGTTTTTGAAAATCTCCACCCCCTGTGAACATAACCTCTGTCGTTGCTTCGGCGGGCACGCCCGCCGGAGGTTCAAAACTCTTATTTTTTTCAGTATCTCTGAGCCTAAAAGACAAATAATCAAAACTTTCAACAACGGATCTCTTGGTTCTGGCATCGATGAAGAACGCAGCGAAATGCGATAAGTAATGTGAATTGCAGAATTCAGTGAATCATCGAATCTTTGAACGCACATTGCGCCCGCCGGTATTCCGGCGGGCATGCCTGTTCGAGCGTCATTTCAACCCTCAAGCCTCGGCTTGGTGTTGGGGCGCCCGGGCCCTCCGCGGCCCGGGGCCCCCAAGTTCATCGGCGGGCTCGTCG…	Eukaryota	Fungi	Ascomycota	Pezizomycotina	Sordariomycetes	Sordariomycetidae	NA	Magnaporthales	NA	NA	NA	Pyriculariaceae	Pyricularia	Pyricularia oryzae	Mexico:Tamaulipas	25.58	-98.16
This_study	OK185302	NA	ACCTTCCGTAGGGGGGAACTGCGGAGGGATCATGTAGTGAAGTTGAAAAACTCCAACCCCTGTGAACATAACCTCTGTCGTTGCTTCGGCGGGCACGCCCGCCGGAGGTTCAAAACTCTTATTTTTTTCAGTATCTCTGAGCCTAAAAGACAAATAATCAAAACTTTCAACAACGGATCTCTTGGTTCTGGCATCGATGAAGAACGCAGCGAAATGCGATAAGTAATGTGAATTGCAGAATTCAGTGAATCATCGAATCTTTGAACGCACATTGCGCCCGCCGGTATTCCGGCGGGCATGCCTGTTCGAGCGTCATTTCAACCCTCAAGCCTCGGCTTGGTGTTGGGGCGCCCGGGCCCTCCGCGGCCCGGGGCCCCCAAGTTCATCGGCGGGCTCGTC…	Eukaryota	Fungi	Ascomycota	Pezizomycotina	Sordariomycetes	Sordariomycetidae	NA	Magnaporthales	NA	NA	NA	Pyriculariaceae	Pyricularia	Pyricularia oryzae	Mexico:Tamaulipas	25.58	-98.16
This_study	OK185301	NA	TCCCTCCGTAGGTGAACCTGCGGAGGGATCCTTTTTGTTTTTGAAAATCTCCACCCCCTGTGAACCTAACCTCTGTCGTTGCTTCGGCGGGCACGCCCGCCGGAGGTTCAAAACTCTTATTTTTTTCAGTATCTCTGAGCCTAAAAGACAAATAATCAAAACTTTCAACAACGGATCTCTTGGTTCTGGCATCGATGAAGAACGCAGCGAAATGCGATAAGTAATGTGAATTGCAGAATTCAGTGAATCATCGAATCTTTGAACGCACATTGCGCCCGCCGGTATTCCGGCGGGCATGCCTGTTCGAGCGTCATTTCAACCCTCAAGCCTCGGCTTGGTGTTGGGGCGCCCGGGCCCTCCGCGGCCCGGGGCCCCCAAGTTCATCGGCGGGCTCGTCGG…	Eukaryota	Fungi	Ascomycota	Pezizomycotina	Sordariomycetes	Sordariomycetidae	NA	Magnaporthales	NA	NA	NA	Pyriculariaceae	Pyricularia	Pyricularia oryzae	Mexico:Tamaulipas	25.58	-98.16
This_study	OK185300	NA	ACTTTCTATTTGTTACTGCGGAGGTGCTCCTTAATCGGTTTTGAAAACCTCCAACCCCTGTGAACATATCCTCTGTCGTTGCTTCGGCGGGCACGCCCGCCGGAGGTTCAAAACTCTTATTTTTTTCAGTATCTCTGAGCCTAAAAGACAAATAATCAAAACTTTCAACAACGGATCTCTTGGTTCTGGCATCGATGAAGAACGCAGCGAAATGCGATAAGTAATGTGAATTGCAGAATTCAGTGAATCATCGAATCTTTGAACGCACATTGCGCCCGCCGGTATTCCGGCGGGCATGCCTGTTCGAGCGTCATTTCAACCCTCAAGCCTCGGCTTGGTGTTGGGGCGCCCGGGCCCTCCGCGGCCCGGGGCCCCCAAGTTCATCGGCGGGCTCGTCGG…	Eukaryota	Fungi	Ascomycota	Pezizomycotina	Sordariomycetes	Sordariomycetidae	NA	Magnaporthales	NA	NA	NA	Pyriculariaceae	Pyricularia	Pyricularia oryzae	Mexico:Tamaulipas	25.58	-98.16
This_study	MT785894	NA	TTCAGTATCTCTGAGCCTAAAAGACAAATAATCAAAACTTTCAACAACGGATCTCTTGGTTCTGGCATCGATGAAGAACGCAGCGAAATGCGATAAGTAATGTGAATTGCAGAATTCAGTGAATCATCGAATCTTTGAACGCACATTGCGCCCGCCGGTATTCCGGCGGGCATGCCTGTTCGAGCGTCATTTCAACCCTCAAGCCTCGGCTTGGTGTTGGGGCGCCCGGGCCCTCCGCGGCCCGGGGCCCCCAAGTTCATCGGCGGGCTCGTCGGTACACTGAGCGCAGTAAAACGCGGTAAAACGCGAACCTCGTTCGGATCGTCCCGGCGTGCTCCAGCCGCTAAACCCCCAATTTTTTAAAGGTTG	Eukaryota	Fungi	Ascomycota	Pezizomycotina	Sordariomycetes	Sordariomycetidae	NA	Magnaporthales	NA	NA	NA	Pyriculariaceae	Pyricularia	Pyricularia oryzae	Mexico:Tamaulipas	25.6	-98.2
This_study	OK185332	NA	TTCAGTATCTCTGAGCCTAAAAGACAAATAATTAAAACTTTCAACAACGGATCTCTTGGTTCTGGCATCGATGAAGAACGCAGCGAAATGCGATAAGTAATGTGAATTGCAGAATTCAGTGAATCATCGAATCTTTGAACGCACATTGCGCCCGCCGGTATTCCGGCGGGCATGCCTGTTCGAGCGTCATTTCAACCCTCAAGCCTCGGCTTGGTGTTGGGGCGCCCGGGCCCTCCGCGGCCCGGGGCCCCCAAGTTCATCGGCGGGCTCGTCGGTACACTGAGCGCAGTAAAACGCGGTAAAACGCGAACCTCGTTCGGATCGTCCCGGCGTGCTCCAGCCGCTAAACCCCCAATTTTTTCTAGGTTGACCTCGGATCAGGTAGGAATACCCGCTGAA…	Eukaryota	Fungi	Ascomycota	Pezizomycotina	Sordariomycetes	Sordariomycetidae	NA	Magnaporthales	NA	NA	NA	Pyriculariaceae	Pyricularia	Pyricularia pennisetigena	Mexico:Tamaulipas	25.6	-98.2
This_study	OK185333	NA	CCTCTCTCTAGTGGGTGAACCCGCGGAGGGATCATTACTGAGTTGAAAAACTCCAACCCCTGTGAACATAACCTCTGTCGTTGCTTCGGCGGGCCAGCCCGCCGGAGGTTCCAAACTCTTTTTTATCTTCAGTATCTCTGAGCCTAAAAGACAAAATGATCAAAACTTTCAACAACGGATCTCTTGGTTCTGGCATCGATGAAGAACGCAGCGAAATGCGATAAGTAATGTGAATTGCAGAATTCAGTGAATCATCGAATCTTTGAACGCACATTGCGCCCGCCGGTATTCCGGCGGGCATGCCTGTTCGAGCGTCATTTCAACCCTCAAGCCTCGGCTTGGTGTTGGGGCGCCCGGGTCCCCCGCGGCCCGGGGCCCCCAAGTTCATCGGCGGGCTCG…	Eukaryota	Fungi	Ascomycota	Pezizomycotina	Sordariomycetes	Sordariomycetidae	NA	Magnaporthales	NA	NA	NA	Pyriculariaceae	Pyricularia	Pyricularia pennisetigena	Mexico:Tamaulipas	25.6	-98.2
This_study	OK185334	NA	GAGTTGAAAAACTCCAACCCCTGTGAACATAACCTCTGTCGTTGCTTCGGCGGGCCAGCCCGCCGGAGGTTCCAAACTCTTTTTTATCTTCAGTATCTCTGAGCCTAAAAGACAAAATGATCAAAACTTTCAACAACGGATCTCTTGGTTCTGGCATCGATGAAGAACGCAGCGAAATGCGATAAGTAATGTGAATTGCAGAATTCAGTGAATCATCGAATCTTTGAACGCACATTGCGCCCGCCGGTATTCCGGCGGGCATGCCTGTTCGAGCGTCATTTCAACCCTCAAGCCTCGGCTTGGTGTTGGGGCGCCCGGGTCCCCCGCGGCCCGGGGCCCCCAAGTTCATCGGCGGGCTCGTCGGTACGCTGAGCGCAGTACAACGCGGTAAAACGCGAA…	Eukaryota	Fungi	Ascomycota	Pezizomycotina	Sordariomycetes	Sordariomycetidae	NA	Magnaporthales	NA	NA	NA	Pyriculariaceae	Pyricularia	Pyricularia pennisetigena	Mexico:Tamaulipas	25.6	-98.2
This_study	OK185335	NA	CCTTCTGTAGGTGAACCTGCGGAGGGATCATTACTGAGTTGAAAAACTCCAACCCCTGTGAACATAACCTCTGTCGTTGCTTCGGCGGGCCAGCCCGCCGGAGGTTCCAAACTCTTTTTTATCTTCAGTATCTCTGAGCCTAAAAGACAAAATGATCAAAACTTTCAACAACGGATCTCTTGGTTCTGGCATCGATGAAGAACGCAGCGAAATGCGATAAGTAATGTGAATTGCAGAATTCAGTGAATCATCGAATCTTTGAACGCACATTGCGCCCGCCGGTATTCCGGCGGGCATGCCTGTTCGAGCGTCATTTCAACCCTCAAGCCTCGGCTTGGTGTTGGGGCGCCCGGGTCCCCCGCGGCCCGGGGCCCCCAAGTTCATCGGCGGGCTCGTCGG…	Eukaryota	Fungi	Ascomycota	Pezizomycotina	Sordariomycetes	Sordariomycetidae	NA	Magnaporthales	NA	NA	NA	Pyriculariaceae	Pyricularia	Pyricularia pennisetigena	Mexico:Tamaulipas	25.6	-98.2
This_study	OK185336	NA	CCTTCCGTAGGGTGAACCTGCGGAGGGATCATTACTGAGTTGAAAAACTCCAACCCCTGTGAACATAACCTCTGTCGTTGCTTCGGCGGGCCAGCCCGCCGGAGGTTCCAAACTCTTTTTTATCTTCAGTATCTCTGAGCCTAAAAGACAAAATGATCAAAACTTTCAACAACGGATCTCTTGGTTCTGGCATCGATGAAGAACGCAGCGAAATGCGATAAGTAATGTGAATTGCAGAATTCAGTGAATCATCGAATCTTTGAACGCACATTGCGCCCGCCGGTATTCCGGCGGGCATGCCTGTTCGAGCGTCATTTCAACCCTCAAGCCTCGGCTTGGTGTTGGGGCGCCCGGGTCCCCCGCGGCCCGGGGCCCCCAAGTTCATCGGCGGGCTCGTCG…	Eukaryota	Fungi	Ascomycota	Pezizomycotina	Sordariomycetes	Sordariomycetidae	NA	Magnaporthales	NA	NA	NA	Pyriculariaceae	Pyricularia	Pyricularia pennisetigena	Mexico:Tamaulipas	25.6	-98.2
NCBI	MH424754	NA	AACCTCTGTCGTTGCTTCGGCGGGCACGCCCGCCGGAGGTTCAAAACTCTTATTTTTTCCAGTATCTCTGAGCCTGAAAGACAAATAATCAAAACTTTCAACAACGGATCTCTTGGTTCTGGCATCGATGAAGAACGCAGCGAAATGCGATAAGTAATGTGAATTGCAGAATTCAGTGAATCATCGAATCTTTGAACGCACATTGCGCCCGCCGGTATTCCGGCGGGCATGCCTGTTCGAGCGTCATTTCAACCCTCAAGCCTCGGCTTGGTGTTGGGGCGCCCGGGCCCTCCGCGGCCCGGGGCCCCCAAGTTCATCGGCGGGCTCGTCGGTACACTGAGCGCAGTAAAACGCGGTAAAACGCGAACCTCGTTCGGATCGTCCCGGCGTGCTCCAGCC…	Eukaryota	Fungi	Ascomycota	Pezizomycotina	Sordariomycetes	Sordariomycetidae	NA	Magnaporthales	NA	NA	NA	Pyriculariaceae	Pyricularia	Pyricularia oryzae	Pakistan	32	74
NCBI	MH424753	NA	TGTCGTTGCTTCGGCGGGCACGCCCGCCGGAGGTTCAAAACTCTTATTTTTTCCAGTATCTCTGAGCCTGAAAGACAAATAATCAAAACTTTCAACAACGGATCTCTTGGTTCTGGCATCGATGAAGAACGCAGCGAAATGCGATAAGTAATGTGAATTGCAGAATTCAGTGAATCATCGAATCTTTGAACGCACATTGCGCCCGCCGGTATTCCGGCGGGCATGCCTGTTCGAGCGTCATTTCAACCCTCAAGCCTCGGCTTGGTGTTGGGGCGCCCGGGCCCTCCGCGGCCCGGGGCCCCCAAGTTCATCGGCGGGCTCGTCGGTACACTGAGCGCAGTAAAACGCGGTAAAACGCGAACCTCGTTCGGATCGTCCCGGCGTGCTCCAGCCGCTAAA…	Eukaryota	Fungi	Ascomycota	Pezizomycotina	Sordariomycetes	Sordariomycetidae	NA	Magnaporthales	NA	NA	NA	Pyriculariaceae	Pyricularia	Pyricularia oryzae	Pakistan	32.1	74.2
NCBI	MH424752	NA	ACCTCTGTCGTTGCTTCGGCGGGCACGCCCGCCGGAGGTTCAAAACTCTTATTTTTTCCAGTATCTCTGAGCCTGAAAGACAAATAATCAAAACTTTCAACAACGGATCTCTTGGTTCTGGCATCGATGAAGAACGCAGCGAAATGCGATAAGTAATGTGAATTGCAGAATTCAGTGAATCATCGAATCTTTGAACGCACATTGCGCCCGCCGGTATTCCGGCGGGCATGCCTGTTCGAGCGTCATTTCAACCCTCAAGCCTCGGCTTGGTGTTGGGGCGCCCGGGCCCTCCGCGGCCCGGGGCCCCCAAGTTCATCGGCGGGCTCGTCGGTACACTGAGCGCAGTAAAACGCGGTAAAACGCGAACCTCGTTCGGATCGTCCCGGCGTGCTCCAGCCG…	Eukaryota	Fungi	Ascomycota	Pezizomycotina	Sordariomycetes	Sordariomycetidae	NA	Magnaporthales	NA	NA	NA	Pyriculariaceae	Pyricularia	Pyricularia oryzae	Pakistan	32.3	73.9
NCBI	MH424751	NA	TCTGTCGTTGCTTCGGCGGGCACGCCCGCCGGAGGTTCAAAACTCTTATTTTTTCCAGTATCTCTGAGCCTGAAAGACAAATAATCAAAACTTTCAACAACGGATCTCTTGGTTCTGGCATCGATGAAGAACGCAGCGAAATGCGATAAGTAATGTGAATTGCAGAATTCAGTGAATCATCGAATCTTTGAACGCACATTGCGCCCGCCGGTATTCCGGCGGGCATGCCTGTTCGAGCGTCATTTCAACCCTCAAGCCTCGGCTTGGTGTTGGGGCGCCCGGGCCCTCCGCGGCCCGGGGCCCCCAAGTTCATCGGCGGGCTCGTCGGTACACTGAGCGCAGTAAAACGCGGTAAAACGCGAACCTCGTTCGGATCGTCCCGGCGTGCTCCAGCCGCTA…	Eukaryota	Fungi	Ascomycota	Pezizomycotina	Sordariomycetes	Sordariomycetidae	NA	Magnaporthales	NA	NA	NA	Pyriculariaceae	Pyricularia	Pyricularia oryzae	Pakistan	32.3	74.1
NCBI	MH424750	NA	CATAACCTCTGTCGTTGCTTCGGCGGGCACGCCCGCCGGAGGTTCAAAACTCTTATTTTTTCCAGTATCTCTGAGCCTGAAAGACAAATAATCAAAACTTTCAACAACGGATCTCTTGGTTCTGGCATCGATGAAGAACGCAGCGAAATGCGATAAGTAATGTGAATTGCAGAATTCAGTGAATCATCGAATCTTTGAACGCACATTGCGCCCGCCGGTATTCCGGCGGGCATGCCTGTTCGAGCGTCATTTCAACCCTCAAGCCTCGGCTTGGTGTTGGGGCGCCCGGGCCCTCCGCGGCCCGGGGCCCCCAAGTTCATCGGCGGGCTCGTCGGTACACTGAGCGCAGTAAAACGCGGTAAAACGCGAACCTCGTTCGGATCGTCCCGGCGTGCTCCA…	Eukaryota	Fungi	Ascomycota	Pezizomycotina	Sordariomycetes	Sordariomycetidae	NA	Magnaporthales	NA	NA	NA	Pyriculariaceae	Pyricularia	Pyricularia oryzae	Pakistan	32.2	74.3
NCBI	MH424749	NA	CTCTGTCGTTGCTTCGGCGGGCACGCCCGCCGGAGGTTCAAAACTCTTATTTTTTCCAGTATCTCTGAGCCTGAAAGACAAATAATCAAAACTTTCAACAACGGATCTCTTGGTTCTGGCATCGATGAAGAACGCAGCGAAATGCGATAAGTAATGTGAATTGCAGAATTCAGTGAATCATCGAATCTTTGAACGCACATTGCGCCCGCCGGTATTCCGGCGGGCATGCCTGTTCGAGCGTCATTTCAACCCTCAAGCCTCGGCTTGGTGTTGGGGCGCCCGGGCCCTCCGCGGCCCGGGGCCCCCAAGTTCATCGGCGGGCTCGTCGGTACACTGAGCGCAGTAAAACGCGGTAAAACGCGAACCTCGTTCGGATCGTCCCGGCGTGCTCCAGCCGCT…	Eukaryota	Fungi	Ascomycota	Pezizomycotina	Sordariomycetes	Sordariomycetidae	NA	Magnaporthales	NA	NA	NA	Pyriculariaceae	Pyricularia	Pyricularia oryzae	Pakistan	32.5	74.6
NCBI	MH424748	NA	AACCTCTGTCGTTGCTTCGGCGGGCACGCCCGCCGGAGGTTCAAAACTCTTATTTTTTCCAGTATCTCTGAGCCTGAAAGACAAATAATCAAAACTTTCAACAACGGATCTCTTGGTTCTGGCATCGATGAAGAACGCAGCGAAATGCGATAAGTAATGTGAATTGCAGAATTCAGTGAATCATCGAATCTTTGAACGCACATTGCGCCCGCCGGTATTCCGGCGGGCATGCCTGTTCGAGCGTCATTTCAACCCTCAAGCCTCGGCTTGGTGTTGGGGCGCCCGGGCCCTCCGCGGCCCGGGGCCCCCAAGTTCATCGGCGGGCTCGTCGGTACACTGAGCGCAGTAAAACGCGGTAAAACGCGAACCTCGTTCGGATCGTCCCGGCGTGCTCCAGCC…	Eukaryota	Fungi	Ascomycota	Pezizomycotina	Sordariomycetes	Sordariomycetidae	NA	Magnaporthales	NA	NA	NA	Pyriculariaceae	Pyricularia	Pyricularia oryzae	Pakistan	32.4	74.8
NCBI	MH424747	NA	CGTTGCTTCGGCGGGCACGCCCGCCGGAGGTTCAAAACTCTTATTTTTTCCAGTATCTCTGAGCCTGAAAGACAAATAATCAAAACTTTCAACAACGGATCTCTTGGTTCTGGCATCGATGAAGAACGCAGCGAAATGCGATAAGTAATGTGAATTGCAGAATTCAGTGAATCATCGAATCTTTGAACGCACATTGCGCCCGCCGGTATTCCGGCGGGCATGCCTGTTCGAGCGTCATTTCAACCCTCAAGCCTCGGCTTGGTGTTGGGGCGCCCGGGCCCTCCGCGGCCCGGGGCCCCCAAGTTCATCGGCGGGCTCGTCGGTACACTGAGCGCAGTAAAACGCGGTAAAACGCGAACCTCGTTCGGATCGTCCCGGCGTGCTCCAGCCGCTAAACCC…	Eukaryota	Fungi	Ascomycota	Pezizomycotina	Sordariomycetes	Sordariomycetidae	NA	Magnaporthales	NA	NA	NA	Pyriculariaceae	Pyricularia	Pyricularia oryzae	Pakistan	32.3	74.5
NCBI	MH424746	NA	ATAACCTCTGTCGTTGCTTCGGCGGGCACGCCCGCCGGAGGTTCAAAACTCTTATTTTTTCCAGTATCTCTGAGCCTGAAAGACAAATAATCAAAACTTTCAACAACGGATCTCTTGGTTCTGGCATCGATGAAGAACGCAGCGAAATGCGATAAGTAATGTGAATTGCAGAATTCAGTGAATCATCGAATCTTTGAACGCACATTGCGCCCGCCGGTATTCCGGCGGGCATGCCTGTTCGAGCGTCATTTCAACCCTCAAGCCTCGGCTTGGTGTTGGGGCGCCCGGGCCCTCCGCGGCCCGGGGCCCCCAAGTTCATCGGCGGGCTCGTCGGTACACTGAGCGCAGTAAAACGCGGTAAAACGCGAACCTCGTTCGGATCGTCCCGGCGTGCTCCAG…	Eukaryota	Fungi	Ascomycota	Pezizomycotina	Sordariomycetes	Sordariomycetidae	NA	Magnaporthales	NA	NA	NA	Pyriculariaceae	Pyricularia	Pyricularia oryzae	Pakistan	32.5	74.3
NCBI	MH424745	NA	TCGTTGCTTCGGCGGGCACGCCCGCCGGAGGTTCAAAACTCTTATTTTTTCCAGTATCTCTGAGCCTGAAAGACAAATAATCAAAACTTTCAACAACGGATCTCTTGGTTCTGGCATCGATGAAGAACGCAGCGAAATGCGATAAGTAATGTGAATTGCAGAATTCAGTGAATCATCGAATCTTTGAACGCACATTGCGCCCGCCGGTATTCCGGCGGGCATGCCTGTTCGAGCGTCATTTCAACCCTCAAGCCTCGGCTTGGTGTTGGGGCGCCCGGGCCCTCCGCGGCCCGGGGCCCCCAAGTTCATCGGCGGGCTCGTCGGTACACTGAGCGCAGTAAAACGCGGTAAAACGCGAACCTCGTTCGGATCGTCCCGGCGTGCTCCAGCCGCTAAACC…	Eukaryota	Fungi	Ascomycota	Pezizomycotina	Sordariomycetes	Sordariomycetidae	NA	Magnaporthales	NA	NA	NA	Pyriculariaceae	Pyricularia	Pyricularia oryzae	Pakistan	32.6	74.5
NCBI	MH424744	NA	AATCAAAACTTTCAACAACGGATCTCTTGGTTCTGGCATCGATGAAGAACGCAGCGAAATGCGATAAGTAATGTGAATTGCAGAATTCAGTGAATCATCGAATCTTTGAACGCACATTGCGCCCGCCGGTATTCCGGCGGGCATGCCTGTTCGAGCGTCATTTCAACCCTCAAGCCTCGGCTTGGTGTTGGGGCGCCCGGGCCCTCCGCGGCCCGGGGCCCCCAAGTTCATCGGCGGGGTCGTCGGTACACTGAGCGCAGTAAAACGCGGTAAAACGCGAACCTCGTTCGGATCGTCCCGGCGTGCTCCAGCCGCTAAACCCCCAATTTTTTAGAGGTTGACCTCGGATCAGGTAGGAATACCCGCTGAACTTAAGCATAT	Eukaryota	Fungi	Ascomycota	Pezizomycotina	Sordariomycetes	Sordariomycetidae	NA	Magnaporthales	NA	NA	NA	Pyriculariaceae	Pyricularia	Pyricularia oryzae	Pakistan	31.9	73.3
NCBI	MH424743	NA	TTCGGCGGGCACGCCCGCCGGAGGTTCAAAACTCTTATTTTTTCCAGTATCTCTGAGCCTGAAAGACAAATAATCAAAACTTTCAACAACGGATCTCTTGGTTCTGGCATCGATGAAGAACGCAGCGAAATGCGATAAGTAATGTGAATTGCAGAATTCAGTGAATCATCGAATCTTTGAACGCACATTGCGCCCGCCGGTATTCCGGCGGGCATGCCTGTTCGAGCGTCATTTCAACCCTCAAGCCTCGGCTTGGTGTTGGGGCGCCCGGGCCCTCCGCGGCCCGGGGCCCCCAAGTTCATCGGCGGGCTCGTCGGTACACTGAGCGCAGTAAAACGCGGTAAAACGCGAACCTCGTTCGGATCGTCCCGGCGTGCTCCAGCCGCTAAACCCCCAATT…	Eukaryota	Fungi	Ascomycota	Pezizomycotina	Sordariomycetes	Sordariomycetidae	NA	Magnaporthales	NA	NA	NA	Pyriculariaceae	Pyricularia	Pyricularia oryzae	Pakistan	32	73.7
NCBI	MH424742	NA	CATAACCTCTGTCGTTGCTTCGGCGGGCACGCCCGCCGGAGGTTCAAAACTCTTATTTTTTCCAGTATCTCTGAGCCTGAAAGACAAATAATCAAAACTTTCAACAACGGATCTCTTGGTTCTGGCATCGATGAAGAACGCAGCGAAATGCGATAAGTAATGTGAATTGCAGAATTCAGTGAATCATCGAATCTTTGAACGCACATTGCGCCCGCCGGTATTCCGGCGGGCATGCCTGTTCGAGCGTCATTTCAACCCTCAAGCCTCGGCTTGGTGTTGGGGCGCCCGGGCCCTCCGCGGCCCGGGGCCCCCAAGTTCATCGGCGGGCTCGTCGGTACACTGAGCGCAGTAAAACGCGGTAAAACGCGAACCTCGTTCGGATCGTCCCGGCGTGCTCCA…	Eukaryota	Fungi	Ascomycota	Pezizomycotina	Sordariomycetes	Sordariomycetidae	NA	Magnaporthales	NA	NA	NA	Pyriculariaceae	Pyricularia	Pyricularia oryzae	Pakistan	32	73.8
NCBI	MH424741	NA	GTCGTTGCTTCGGCGGGCACGCCCGCCGGAGGTTCAAAACTCTTATTTTTTCCAGTATCTCTGAGCCTGAAAGACAAATAATCAAAACTTTCAACAACGGATCTCTTGGTTCTGGCATCGATGAAGAACGCAGCGAAATGCGATAAGTAATGTGAATTGCAGAATTCAGTGAATCATCGAATCTTTGAACGCACATTGCGCCCGCCGGTATTCCGGCGGGCATGCCTGTTCGAGCGTCATTTCAACCCTCAAGCCTCGGCTTGGTGTTGGGGCGCCCGGGCCCTCCGCGGCCCGGGGCCCCCAAGTTCATCGGCGGGCTCGTCGGTACACTGAGCGCAGTAAAACGCGGTAAAACGCGAACCTCGTTCGGATCGTCCCGGCGTGCTCCAGCCGCTAAAC…	Eukaryota	Fungi	Ascomycota	Pezizomycotina	Sordariomycetes	Sordariomycetidae	NA	Magnaporthales	NA	NA	NA	Pyriculariaceae	Pyricularia	Pyricularia oryzae	Pakistan	32.1	73.4
NCBI	MH424740	NA	ACATAACCTCTGTCGTTGCTTCGGCGGGCACGCCCGCCGGAGGTTCAAAACTCTTATTTTTTCCAGTATCTCTGAGCCTGAAAGACAAATAATCAAAACTTTCAACAACGGATCTCTTGGTTCTGGCATCGATGAAGAACGCAGCGAAATGCGATAAGTAATGTGAATTGCAGAATTCAGTGAATCATCGAATCTTTGAACGCACATTGCGCCCGCCGGTATTCCGGCGGGCATGCCTGTTCGAGCGTCATTTCAACCCTCAAGCCTCGGCTTGGTGTTGGGGCGCCCGGGCCCTCCGCGGCCCGGGGCCCCCAAGTTCATCGGCGGGCTCGTCGGTACACTGAGCGCAGTAAAACGCGGTAAAACGCGAACCTCGTTCGGATCGTCCCGGCGTGCTCC…	Eukaryota	Fungi	Ascomycota	Pezizomycotina	Sordariomycetes	Sordariomycetidae	NA	Magnaporthales	NA	NA	NA	Pyriculariaceae	Pyricularia	Pyricularia oryzae	Pakistan	32.2	73.7
NCBI	MH424739	NA	TGTCGTTGCTTCGGCGGGCACGCCCGCCGGAGGTTCAAAACTCTTATTTTTTCCAGTATCTCTGAGCCTGAAAGACAAATAATCAAAACTTTCAACAACGGATCTCTTGGTTCTGGCATCGATGAAGAACGCAGCGAAATGCGATAAGTAATGTGAATTGCAGAATTCAGTGAATCATCGAATCTTTGAACGCACATTGCGCCCGCCGGTATTCCGGCGGGCATGCCTGTTCGAGCGTCATTTCAACCCTCAAGCCTCGGCTTGGTGTTGGGGCGCCCGGGCCCTCCGCGGCCCGGGGCCCCCAAGTTCATCGGCGGGCTCGTCGGTACACTGAGCGCAGTAAAACGCGGTAAAACGCGAACCTCGTTCGGATCGTCCCGGCGTGCTCCAGCCGCTAAA…	Eukaryota	Fungi	Ascomycota	Pezizomycotina	Sordariomycetes	Sordariomycetidae	NA	Magnaporthales	NA	NA	NA	Pyriculariaceae	Pyricularia	Pyricularia oryzae	Pakistan	32.1	74.9
NCBI	MH424738	NA	GCTTCGGCGGGCACGCCCGCCGGAGGTTCAAAACTCTTATTTTTTCCAGTATCTCTGAGCCTGAAAGACAAATAATCAAAACTTTCAACAACGGATCTCTTGGTTCTGGCATCGATGAAGAACGCAGCGAAATGCGATAAGTAATGTGAATTGCAGAATTCAGTGAATCATCGAATCTTTGAACGCACATTGCGCCCGCCGGTATTCCGGCGGGCATGCCTGTTCGAGCGTCATTTCAACCCTCAAGCCTCGGCTTGGTGTTGGGGCGCCCGGGCCCTCCGCGGCCCGGGGCCCCCAAGTTCATCGGCGGGCTCGTCGGTACACTGAGCGCAGTAAAACGCGGTAAAACGCGAACCTCGTTCGGATCGTCCCGGCGTGCTCCAGCCGCTAAACCCCCAA…	Eukaryota	Fungi	Ascomycota	Pezizomycotina	Sordariomycetes	Sordariomycetidae	NA	Magnaporthales	NA	NA	NA	Pyriculariaceae	Pyricularia	Pyricularia oryzae	Pakistan	32	74.7
NCBI	MH424737	NA	GACATAACCTCTGTCGTTGCTTCGGCGGGCACGCCCGCCGGAGGTTCAAAACTCTTATTTTTTCCAGTATCTCTGAGCCTGAAAGACAAATAATCAAAACTTTCAACAACGGATCTCTTGGTTCTGGCATCGATGAAGAACGCAGCGAAATGCGATAAGTAATGTGAATTGCAGAATTCAGTGAATCATCGAATCTTTGAACGCACATTGCGCCCGCCGGTATTCCGGCGGGCATGCCTGTTCGAGCGTCATTTCAACCCTCAAGCCTCGGCTTGGTGTTGGGGCGCCCGGGCCCTCCGCGGCCCGGGGCCCCCAAGTTCATCGGCGGGCTCGTCGGTACACTGAGCGCAGTAAAACGCGGTAAAACGCGAACCTCGTTCGGATCGTCCCGGCGTGCTC…	Eukaryota	Fungi	Ascomycota	Pezizomycotina	Sordariomycetes	Sordariomycetidae	NA	Magnaporthales	NA	NA	NA	Pyriculariaceae	Pyricularia	Pyricularia oryzae	Pakistan	32.2	74.8
NCBI	MH424736	NA	CTGTCGTTGCTTCGGCGGGCACGCCCGCCGGAGGTTCAAAACTCTTATTTTTTCCAGTATCTCTGAGCCTGAAAGACAAATAATCAAAACTTTCAACAACGGATCTCTTGGTTCTGGCATCGATGAAGAACGCAGCGAAATGCGATAAGTAATGTGAATTGCAGAATTCAGTGAATCATCGAATCTTTGAACGCACATTGCGCCCGCCGGTATTCCGGCGGGCATGCCTGTTCGAGCGTCATTTCAACCCTCAAGCCTCGGCTTGGTGTTGGGGCGCCCGGGCCCTCCGCGGCCCGGGGCCCCCAAGTTCATCGGCGGGCTCGTCGGTACACTGAGCGCAGTAAAACGCGGTAAAACGCGAACCTCGTTCGGATCGTCCCGGCGTGCTCCAGCCGCTAA…	Eukaryota	Fungi	Ascomycota	Pezizomycotina	Sordariomycetes	Sordariomycetidae	NA	Magnaporthales	NA	NA	NA	Pyriculariaceae	Pyricularia	Pyricularia oryzae	Pakistan	32.4	75
NCBI	MH424735	NA	TAATCAAAACTTTCAACAACGGATCTCTTGGTTCTGGCATCGATGAAGAACGCAGCGAAATGCGATAAGTAATGTGAATTGCAGAATTCAGTGAATCATCGAATCTTTGAACGCACATTGCGCCCGCCGGTATTCCGGCGGGCATGCCTGTTCGAGCGTCATTTCAACCCTCAAGCCTCGGCTTGGTGTTGGGGCGCCCGGGCCCTCCGCGGCCCGGGGCCCCCAAGTTCATCGGCGGGCTCGTCGGTACACTGAGCGCAGTAAAACGCGGTAAAACGCGAACCTCGTTCGGATCGTCCCGGCGTGCTCCAGCCGCTAAACCCCCAATTTTTTAGAGGTTGACCTCGGATCAGGTAGGAATACCCGCTGAACTTAAGCATATCAATAAG	Eukaryota	Fungi	Ascomycota	Pezizomycotina	Sordariomycetes	Sordariomycetidae	NA	Magnaporthales	NA	NA	NA	Pyriculariaceae	Pyricularia	Pyricularia oryzae	Pakistan	32.2	75.2
NCBI	MH424734	NA	CTGTCGTTGCTTCGGCGGGCACGCCCGCCGGAGGTTCAAAACTCTTATTTTTTCCAGTATCTCTGAGCCTGAAAGACAAATAATCAAAACTTTCAACAACGGATCTCTTGGTTCTGGCATCGATGAAGAACGCAGCGAAATGCGATAAGTAATGTGAATTGCAGAATTCAGTGAATCATCGAATCTTTGAACGCACATTGCGCCCGCCGGTATTCCGGCGGGCATGCCTGTTCGAGCGTCATTTCAACCCTCAAGCCTCGGCTTGGTGTTGGGGCGCCCGGGCCCTCCGCGGCCCGGGGCCCCCAAGTTCATCGGCGGGCTCGTCGGTACACTGAGCGCAGTAAAACGCGGTAAAACGCGAACCTCGTTCGGATCGTCCCGGCGTGCTCCAGCCGCTAA…	Eukaryota	Fungi	Ascomycota	Pezizomycotina	Sordariomycetes	Sordariomycetidae	NA	Magnaporthales	NA	NA	NA	Pyriculariaceae	Pyricularia	Pyricularia oryzae	Pakistan	31.6	73.8
NCBI	MH424733	NA	AAATAATCAAAACTTTCAACAACGGATCTCTTGGTTCTGGCATCGATGAAGAACGCAGCGAAATGCGATAAGTAATGTGAATTGCAGAATTCAGTGAATCATCGAATCTTTGAACGCACATTGCGCCCGCCGGTATTCCGGCGGGCATGCCTGTTCGAGCGTCATTTCAACCCTCAAGCCTCGGCTTGGTGTTGGGGCGCCCGGGCCCTCCGCGGCCCGGGGCCCCCAAGTTCATCGGCGGGCTCGTCGGTACACTGAGCGCAGTAAAACGCGGTAAAACGCGAACCTCGTTCGGATCGTCCCGGCGTGCTCCAGCCGCTAAACCCCCAATTTTTTAGAGGTTGACCTCGGATCAGGTAGGAATACCCGCTGAACTTAAGCATATCAATAAGC	Eukaryota	Fungi	Ascomycota	Pezizomycotina	Sordariomycetes	Sordariomycetidae	NA	Magnaporthales	NA	NA	NA	Pyriculariaceae	Pyricularia	Pyricularia oryzae	Pakistan	31.5	73.6
NCBI	MH424732	NA	TGACATAACCTCTGTCGTTGCTTCGGCGGGCACGCCCGCCGGAGGTTCAAAACTCTTATTTTTTCCAGTATCTCTGAGCCTGAAAGACAAATAATCAAAACTTTCAACAACGGATCTCTTGGTTCTGGCATCGATGAAGAACGCAGCGAAATGCGATAAGTAATGTGAATTGCAGAATTCAGTGAATCATCGAATCTTTGAACGCACATTGCGCCCGCCGGTATTCCGGCGGGCATGCCTGTTCGAGCGTCATTTCAACCCTCAAGCCTCGGCTTGGTGTTGGGGCGCCCGGGCCCTCCGCGGCCCGGGGCCCCCAAGTTCATCGGCGGGCTCGTCGGTACACTGAGCGCAGTAAAACGCGGTAAAACGCGAACCTCGTTCGGATCGTCCCGGCGTGCT…	Eukaryota	Fungi	Ascomycota	Pezizomycotina	Sordariomycetes	Sordariomycetidae	NA	Magnaporthales	NA	NA	NA	Pyriculariaceae	Pyricularia	Pyricularia oryzae	Pakistan	31.4	73.7
NCBI	MH424731	NA	TCTGTCGTTGCTTCGGCGGGCACGCCCGCCGGAGGTTCAAAACTCTTATTTTTTCCAGTATCTCTGAGCCTGAAAGACAAATAATCAAAACTTTCAACAACGGATCTCTTGGTTCTGGCATCGATGAAGAACGCAGCGAAATGCGATAAGTAATGTGAATTGCAGAATTCAGTGAATCATCGAATCTTTGAACGCACATTGCGCCCGCCGGTATTCCGGCGGGCATGCCTGTTCGAGCGTCATTTCAACCCTCAAGCCTCGGCTTGGTGTTGGGGCGCCCGGGCCCTCCGCGGCCCGGGGCCCCCAAGTTCATCGGCGGGCTCGTCGGTACACTGAGCGCAGTAAAACGCGGTAAAACGCGAACCTCGTTCGGATCGTCCCGGCGTGCTCCAGCCGCTA…	Eukaryota	Fungi	Ascomycota	Pezizomycotina	Sordariomycetes	Sordariomycetidae	NA	Magnaporthales	NA	NA	NA	Pyriculariaceae	Pyricularia	Pyricularia oryzae	Pakistan	31.3	73.8
NCBI	MH424730	NA	GTCGTTGCTTCGGCGGGCACGCCCGCCGGAGGTTCAAAACTCTTATTTTTTCCAGTATCTCTGAGCCTGAAAGACAAATAATCAAAACTTTCAACAACGGATCTCTTGGTTCTGGCATCGATGAAGAACGCAGCGAAATGCGATAAGTAATGTGAATTGCAGAATTCAGTGAATCATCGAATCTTTGAACGCACATTGCGCCCGCCGGTATTCCGGCGGGCATGCCTGTTCGAGCGTCATTTCAACCCTCAAGCCTCGGCTTGGTGTTGGGGCGCCCGGGCCCTCCGCGGCCCGGGGCCCCCAAGTTCATCGGCGGGCTCGTCGGTACACTGAGCGCAGTAAAACGCGGTAAAACGCGAACCTCGTTCGGATCGTCCCGGCGTGCTCCAGCCGCTAAAC…	Eukaryota	Fungi	Ascomycota	Pezizomycotina	Sordariomycetes	Sordariomycetidae	NA	Magnaporthales	NA	NA	NA	Pyriculariaceae	Pyricularia	Pyricularia oryzae	Pakistan	31.7	73.4
NCBI	MN203037	NA	AGGGATCATTACTGAGTTGAAAAACTCCAACCCCTGTGAACATAACCTCCTGTCGTTGCTTCGGCGGGCACGCCCGCCGGAGGTTCAAAACTCTTATTTTTTTCAGTATCTCTGAGCCTAAAAGACAAATAATCAAAACTTTCAACAACGGATCTCTTGGTTCTGGCATCGATGAAGAACGCAGCGAAATGCGATAAGTAATGTGAATTGCAGAATTCAGTGAATCATCGAATCTTTGAACGCACATTGCGCCCGCCGGTATTCCGGCGGGCATGCCTGTTCGAGCGTCATTTCAACCCTCAAGCCTCGGCTTGGTGTTGGGGCGCCCGGGCCCTCCGCGGCCCGGGGCCCCCAAGTTCATCGGCGGGCTCGTCGGTTCACTGAGCGCAGTAAAACGCG…	Eukaryota	Fungi	Ascomycota	Pezizomycotina	Sordariomycetes	Sordariomycetidae	NA	Magnaporthales	NA	NA	NA	Pyriculariaceae	Pyricularia	Pyricularia oryzae	Tanzania	-6.4	34.9
NCBI	MN203036	NA	AGGGATCATTACTGAGTTGAAAAACTCCAACCCCTGTGAACATAACCTCCTGTCGTTGCTTCGGCGGGCACGCCCGCCGGAGGTTCAAAACTCTTATTTTTTTCAGTATCTCTGAGCCTAAAAGACAAATAATCAAAACTTTCAACAACGGATCTCTTGGTTCTGGCATCGATGAAGAACGCAGCGAAATGCGATAAGTAATGTGAATTGCAGAATTCAGTGAATCATCGAATCTTTGAACGCACATTGCGCCCGCCGGTATTCCGGCGGGCATGCCTGTTCGAGCGTCATTTCAACCCTCAAGCCTCGGCTTGGTGTTGGGGCGCCCGGGCCCTCCGCGGCCCGGGGCCCCCAAGTTCATCGGCGGGCTCGTCGGTACACTGAGCGCAGTAAAACGCG…	Eukaryota	Fungi	Ascomycota	Pezizomycotina	Sordariomycetes	Sordariomycetidae	NA	Magnaporthales	NA	NA	NA	Pyriculariaceae	Pyricularia	Pyricularia oryzae	Tanzania	-6.4	34.9
NCBI	MN203035	NA	AGGGATCATTACTGAGTTGAAAAACTCCAACCCCTGTGAACATAACCTCCTGTCGTTGCTTCGGCGGGCACGCCCGCCGGAGGTTCAAAACTCTTATTTTTTTCAGTATCTCTGAGCCTAAAAGACAAATAATCAAAACTTTCAACAACGGATCTCTTGGTTCTGGCATCGATGAAGAACGCAGCGAAATGCGATAAGTAATGTGAATTGCAGAATTCAGTGAATCATCGAATCTTTGAACGCACATTGCGCCCGCCGGTATTCCGGCGGGCATGCCTGTTCGAGCGTCATTTCAACCCTCAAGCCTCGGCTTGGTGTTGGGGCGCCCGGGCCCTCCGCGGCCCGGGGCCCCCAAGTTCATCGGCGGGCTCGTCGGTACACTGAGCGCAGTAAAACGCG…	Eukaryota	Fungi	Ascomycota	Pezizomycotina	Sordariomycetes	Sordariomycetidae	NA	Magnaporthales	NA	NA	NA	Pyriculariaceae	Pyricularia	Pyricularia oryzae	Tanzania	-6.4	34.9
NCBI	MN203034	NA	AGGGATCATTACTGAGTTGAAAAACTCCAACCCCTGTGAACATACCCTCCTGTCGTTGCTTCGGCGGGCACGCCCGCCGGAGGTTCAAAACTCTTATTTTTTTCAGTATCTCTGAGCCTAAAAGACAAATAATCAAAACTTTCAACAACGGATCTCTTGGTTCTGGCATCGATGAAGAACGCAGCGAAATGCGATAAGTAATGTGAATTGCAGAATTCAGTGAATCATCGAATCTTTGAACGCACATTGCGCCCGCCGGTATTCCGGCGGGCATGCCTGTTCGAGCGTCATTTCAACCCTCAAGCCTCGGCTTGGTGTTGGGGCGCCCGGGCCCTCCGCGGCCCGGGGCCCCCAAGTTCATCGGCGGGCTCGTCGGTACACTGAGCGCAGTAAAACGCG…	Eukaryota	Fungi	Ascomycota	Pezizomycotina	Sordariomycetes	Sordariomycetidae	NA	Magnaporthales	NA	NA	NA	Pyriculariaceae	Pyricularia	Pyricularia oryzae	Tanzania	-6.4	34.9
NCBI	MN203033	NA	AGGGATCATTACTGAGTTGAAAAACTCCAACCCCTGTGAACATAACCTCCTGTCGTTGCTTCGGCGGGCACGCCCGCCGGAGGTTCAAAACTCTTATTTTTTTCAGTATCTCTGAGCCTAAAAGACAAATAATCAAAACTTTCAACAACGGATCTCTTGGTTCTGGCATCGATGAAGAACGCAGCGAAATGCGATAAGTAATGTGAATTGCAGAATTCAGTGAATCATCGAATCTTTGAACGCACATTGCGCCCGCCGGTATTCCGGCGGGCATGCCTGTTCGAGCGTCATTTCAACCCTCAAGCCTCGGCTTGGTGTTGGGGCGCCCGGGCCCTCCGCGGCCCGGGGCCCCCAAGTTCATCGGCGGGCTCGTCGGTTCACTGAGCGCAGTAAAACGCG…	Eukaryota	Fungi	Ascomycota	Pezizomycotina	Sordariomycetes	Sordariomycetidae	NA	Magnaporthales	NA	NA	NA	Pyriculariaceae	Pyricularia	Pyricularia oryzae	Tanzania	-6.4	34.9
NCBI	MN203032	NA	AGGGATCATTACTGAGTTGAAAAACTCCAACCCCTGTGAACATACCCTCCTGTCGTTGCTTCGGCGGGCACGCCCGCCGGAGGTTCAAAACTCTTATTTTTTTCAGTATCTCTGAGCCTAAAAGACAAATAATCAAAACTTTCAACAACGGATCTCTTGGTTCTGGCATCGATGAAGAACGCAGCGAAATGCGATAAGTAATGTGAATTGCAGAATTCAGTGAATCATCGAATCTTTGAACGCACATTGCGCCCGCCGGTATTCCGGCGGGCATGCCTGTTCGAGCGTCATTTCAACCCTCAAGCCTCGGCTTGGTGTTGGGGCGCCCGGGCCCTCCGCGGCCCGGGGCCCCCAAGTTCATCGGCGGGCTCGTCGGTTCACTGAGCGCAGTAAAACGCG…	Eukaryota	Fungi	Ascomycota	Pezizomycotina	Sordariomycetes	Sordariomycetidae	NA	Magnaporthales	NA	NA	NA	Pyriculariaceae	Pyricularia	Pyricularia oryzae	Tanzania	-6.4	34.9
NCBI	MN203031	NA	AGGGATCATTACTGAGTTGAAAAACTCCAACCCCTGTGAACATAACCTCCTGTCGTTGCTTCGGCGGGCACGCCCGCCGGAGGTTCAAAACTCTTATTTTTTTCAGTATCTCTGAGCCTAAAAGACAAATAATCAAAACTTTCAACAACGGATCTCTTGGTTCTGGCATCGATGAAGAACGCAGCGAAATGCGATAAGTAATGTGAATTGCAGAATTCAGTGAATCATCGAATCTTTGAACGCACATTGCGCCCGCCGGTATTCCGGCGGGCATGCCTGTTCGAGCGTCATTTCAACCCTCAAGCCTCGGCTTGGTGTTGGGGCGCCCGGGCCCTCCGCGGCCCGGGGCCCCCAAGTTCATCGGCGGGCTCGTCGGTACACTGAGCGCAGTAAAACGCG…	Eukaryota	Fungi	Ascomycota	Pezizomycotina	Sordariomycetes	Sordariomycetidae	NA	Magnaporthales	NA	NA	NA	Pyriculariaceae	Pyricularia	Pyricularia oryzae	Tanzania	-6.4	34.9
NCBI	MN203030	NA	AGGGATCATTACTGAGTTGAAAAACTCCAACCCCTGTGAACATAACCTCCTGTCGTTGCTTCGGCGGGCACGCCCGCCGGAGGTTCAAAACTCTTATTTTTTTCAGTATCTCTGAGCCTAAAAGACAAATAATCAAAACTTTCAACAACGGATCTCTTGGTTCTGGCATCGATGAAGAACGCAGCGAAATGCGATAAGTAATGTGAATTGCAGAATTCAGTGAATCATCGAATCTTTGAACGCACATTGCGCCCGCCGGTATTCCGGCGGGCATGCCTGTTCGAGCGTCATTTCAACCCTCAAGCCTCGGCTTGGTGTTGGGGCGCCCGGGCCCTCCGCGGCCCGGGGCCCCCAAGTTCATCGGCGGGCTCGTCGGTACACTGAGCGCAGTAAAACGCG…	Eukaryota	Fungi	Ascomycota	Pezizomycotina	Sordariomycetes	Sordariomycetidae	NA	Magnaporthales	NA	NA	NA	Pyriculariaceae	Pyricularia	Pyricularia oryzae	Tanzania	-6.4	34.9
NCBI	MN203029	NA	AGGGATCATTACTGAGTTGAAAAACTCCAACCCCTGTGAACATAACCTCCTGTCGTTGCTTCGGCGGGCACGCCCGCCGGAGGTTCAAAACTCTTATTTTTTTCAGTATCTCTGAGCCTAAAAGACAAATAATCAAAACTTTCAACAACGGATCTCTTGGTTCTGGCATCGATGAAGAACGCAGCGAAATGCGATAAGTAATGTGAATTGCAGAATTCAGTGAATCATCGAATCTTTGAACGCACATTGCGCCCGCCGGTATTCCGGCGGGCATGCCTGTTCGAGCGTCATTTCAACCCTCAAGCCTCGGCTTGGTGTTGGGGCGCCCGGGCCCTCCGCGGCCCGGGGCCCCCAAGTTCATCGGCGGGCTCGTCGGTACACTGAGCGCAGTAAAACGCG…	Eukaryota	Fungi	Ascomycota	Pezizomycotina	Sordariomycetes	Sordariomycetidae	NA	Magnaporthales	NA	NA	NA	Pyriculariaceae	Pyricularia	Pyricularia oryzae	Tanzania	-6.4	34.9
NCBI	MN203028	NA	AGGGATCATTACTGAGTTGAAAAACTCCAACCCCTGTGAACATAACCTCCTGTCGTTGCTTCGGCGGGCACGCCCGCCGGAGGTTCAAAACTCTTATTTTTTTCAGTATCTCTGAGCCTAAAAGACAAATAATCAAAACTTTCAACAACGGATCTCTTGGTTCTGGCATCGATGAAGAACGCAGCGAAATGCGATAAGTAATGTGAATTGCAGAATTCAGTGAATCATCGAATCTTTGAACGCACATTGCGCCCGCCGGTATTCCGGCGGGCATGCCTGTTCGAGCGTCATTTCAACCCTCAAGCCTCGGCTTGGTGTTGGGGCGCCCGGGCCCTCCGCGGCCCGGGGCCCCCAAGTTCATCGGCGGGCTCGTCGGTACACTGAGCGCAGTAAAACGCG…	Eukaryota	Fungi	Ascomycota	Pezizomycotina	Sordariomycetes	Sordariomycetidae	NA	Magnaporthales	NA	NA	NA	Pyriculariaceae	Pyricularia	Pyricularia oryzae	Tanzania	-6.4	34.9
NCBI	MN203027	NA	AGGGATCATTACTGAGTTGAAAAACTCCAACCCCTGTGAACATAACCTCCTGTCGTTGCTTCGGCGGGCACGCCCGCCGGAGGTTCAAAACTCTTATTTTTTTCAGTATCTCTGAGCCTAAAAGACAAATAATCAAAACTTTCAACAACGGATCTCTTGGTTCTGGCATCGATGAAGAACGCAGCGAAATGCGATAAGTAATGTGAATTGCAGAATTCAGTGAATCATCGAATCTTTGAACGCACATTGCGCCCGCCGGTATTCCGGCGGGCATGCCTGTTCGAGCGTCATTTCAACCCTCAAGCCTCGGCTTGGTGTTGGGGCGCCCGGGCCCTCCGCGGCCCGGGGCCCCCAAGTTCATCGGCGGGCTCGTCGGTACACTGAGCGCAGTAAAACGCG…	Eukaryota	Fungi	Ascomycota	Pezizomycotina	Sordariomycetes	Sordariomycetidae	NA	Magnaporthales	NA	NA	NA	Pyriculariaceae	Pyricularia	Pyricularia oryzae	Tanzania	-6.4	34.9
NCBI	MN203026	NA	AGGGATCATTACTGAGTTGAAAAACTCCAACCCCTGTGAACATAACCTCCTGTCGTTGCTTCGGCGGGCACGCCCGCCGGAGGTTCAAAACTCTTATTTTTTTCAGTATCTCTGAGCCTAAAAGACAAATAATCAAAACTTTCAACAACGGATCTCTTGGTTCTGGCATCGATGAAGAACGCAGCGAAATGCGATAAGTAATGTGAATTGCAGAATTCAGTGAATCATCGAATCTTTGAACGCACATTGCGCCCGCCGGTATTCCGGCGGGCATGCCTGTTCGAGCGTCATTTCAACCCTCAAGCCTCGGCTTGGTGTTGGGGCGCCCGGGCCCTCCGCGGCCCGGGGCCCCCAAGTTCATCGGCGGGCTCGTCGGTACACTGAGCGCAGTAAAACGCG…	Eukaryota	Fungi	Ascomycota	Pezizomycotina	Sordariomycetes	Sordariomycetidae	NA	Magnaporthales	NA	NA	NA	Pyriculariaceae	Pyricularia	Pyricularia oryzae	Tanzania	-6.4	34.9
NCBI	MN203025	NA	AGGGATCATTACTGAGTTGAAAAACTCCAACCCCTGTGAACATAACCTCCTGTCGTTGCTTCGGCGGGCACGCCCGCCGGAGGTTCAAAACTCTTATTTTTTTCAGTATCTCTGAGCCTAAAAGACAAATAATCAAAACTTTCAACAACGGATCTCTTGGTTCTGGCATCGATGAAGAACGCAGCGAAATGCGATAAGTAATGTGAATTGCAGAATTCAGTGAATCATCGAATCTTTGAACGCACATTGCGCCCGCCGGTATTCCGGCGGGCATGCCTGTTCGAGCGTCATTTCAACCCTCAAGCCTCGGCTTGGTGTTGGGGCGCCCGGGCCCTCCGCGGCCCGGGGCCCCCAAGTTCATCGGCGGGCTCGTCGGTACACTGAGCGCAGTAAAACGCG…	Eukaryota	Fungi	Ascomycota	Pezizomycotina	Sordariomycetes	Sordariomycetidae	NA	Magnaporthales	NA	NA	NA	Pyriculariaceae	Pyricularia	Pyricularia oryzae	Tanzania	-6.4	34.9
NCBI	MN203024	NA	AGGGATCATTACTGAGTTGAAAAACTCCAACCCCTGTGAACATAACCTCCTGTCGTTGCTTCGGCGGGCACGCCCGCCGGAGGTTCAAAACTCTTATTTTTTTCAGTATCTCTGAGCCTAAAAGACAAATAATCAAAACTTTCAACAACGGATCTCTTGGTTCTGGCATCGATGAAGAACGCAGCGAAATGCGATAAGTAATGTGAATTGCAGAATTCAGTGAATCATCGAATCTTTGAACGCACATTGCGCCCGCCGGTATTCCGGCGGGCATGCCTGTTCGAGCGTCATTTCAACCCTCAAGCCTCGGCTTGGTGTTGGGGCGCCCGGGCCCTCCGCGGCCCGGGGCCCCCAAGTTCATCGGCGGGCTCGTCGGTACACTGAGCGCAGTAAAACGCG…	Eukaryota	Fungi	Ascomycota	Pezizomycotina	Sordariomycetes	Sordariomycetidae	NA	Magnaporthales	NA	NA	NA	Pyriculariaceae	Pyricularia	Pyricularia oryzae	Tanzania	-6.4	34.9
NCBI	MN203023	NA	AGGGATCATTACTGAGTTGAAAAACTCCAACCCCTGTGAACATAACCTCCTGTCGTTGCTTCGGCGGGCACGCCCGCCGGAGGTTCAAAACTCTTATTTTTTTCAGTATCTCTGAGCCTAAAAGACAAATAATCAAAACTTTCAACAACGGATCTCTTGGTTCTGGCATCGATGAAGAACGCAGCGAAATGCGATAAGTAATGTGAATTGCAGAATTCAGTGAATCATCGAATCTTTGAACGCACATTGCGCCCGCCGGTATTCCGGCGGGCATGCCTGTTCGAGCGTCATTTCAACCCTCAAGCCTCGGCTTGGTGTTGGGGCGCCCGGGCCCTCCGCGGCCCGGGGCCCCCAAGTTCATCGGCGGGCTCGTCGGTACACTGAGCGCAGTAAAACGCG…	Eukaryota	Fungi	Ascomycota	Pezizomycotina	Sordariomycetes	Sordariomycetidae	NA	Magnaporthales	NA	NA	NA	Pyriculariaceae	Pyricularia	Pyricularia oryzae	Tanzania	-6.4	34.9
NCBI	MN203022	NA	AGGGATCATTACTGAGTTGAAAAACTCCAACCCCTGTGAACATAACCTCCTGTCGTTGCTTCGGCGGGCACGCCCGCCGGAGGTTCAAAACTCTTATTTTTTTCAGTATCTCTGAGCCTAAAAGACAAATAATCAAAACTTTCAACAACGGATCTCTTGGTTCTGGCATCGATGAAGAACGCAGCGAAATGCGATAAGTAATGTGAATTGCAGAATTCAGTGAATCATCGAATCTTTGAACGCACATTGCGCCCGCCGGTATTCCGGCGGGCATGCCTGTTCGAGCGTCATTTCAACCCTCAAGCCTCGGCTTGGTGTTGGGGCGCCCGGGCCCTCCGCGGCCCGGGGCCCCCAAGTTCATCGGCGGGCTCGTCGGTACACTGAGCGCAGTAAAACGCG…	Eukaryota	Fungi	Ascomycota	Pezizomycotina	Sordariomycetes	Sordariomycetidae	NA	Magnaporthales	NA	NA	NA	Pyriculariaceae	Pyricularia	Pyricularia oryzae	Tanzania	-6.4	34.9
NCBI	MN203021	NA	AGGGATCATTACTGAGTTGAAAAACTCCAACCCCTGTGAACATAACCTCCTGTCGTTGCTTCGGCGGGCACGCCCGCCGGAGGTTCAAAACTCTTATTTTTTTCAGTATCTCTGAGCCTAAAAGACAAATAATCAAAACTTTCAACAACGGATCTCTTGGTTCTGGCATCGATGAAGAACGCAGCGAAATGCGATAAGTAATGTGAATTGCAGAATTCAGTGAATCATCGAATCTTTGAACGCACATTGCGCCCGCCGGTATTCCGGCGGGCATGCCTGTTCGAGCGTCATTTCAACCCTCAAGCCTCGGCTTGGTGTTGGGGCGCCCGGGCCCTCCGCGGCCCGGGGCCCCCAAGTTCATCGGCGGGCTCGTCGGTACACTGAGCGCAGTAAAACGCG…	Eukaryota	Fungi	Ascomycota	Pezizomycotina	Sordariomycetes	Sordariomycetidae	NA	Magnaporthales	NA	NA	NA	Pyriculariaceae	Pyricularia	Pyricularia oryzae	Tanzania	-6.4	34.9
NCBI	MN203020	NA	AGGGATCATTACTGAGTTGAAAAACTCCAACCCCTGTGAACATAACCTCCTGTCGTTGCTTCGGCGGGCACGCCCGCCGGAGGTTCAAAACTCTTATTTTTTTCAGTATCTCTGAGCCTAAAAGACAAATAATCAAAACTTTCAACAACGGATCTCTTGGTTCTGGCATCGATGAAGAACGCAGCGAAATGCGATAAGTAATGTGAATTGCAGAATTCAGTGAATCATCGAATCTTTGAACGCACATTGCGCCCGCCGGTATTCCGGCGGGCATGCCTGTTCGAGCGTCATTTCAACCCTCAAGCCTCGGCTTGGTGTTGGGGCGCCCGGGCCCTCCGCGGCCCGGGGCCCCCAAGTTCATCGGCGGGCTCGTCGGTACACTGAGCGCAGTAAAACGCG…	Eukaryota	Fungi	Ascomycota	Pezizomycotina	Sordariomycetes	Sordariomycetidae	NA	Magnaporthales	NA	NA	NA	Pyriculariaceae	Pyricularia	Pyricularia oryzae	Tanzania	-6.4	34.9
NCBI	MN203019	NA	AGGGATCATTACTGAGTTGAAAAACTCCAACCCCTGTGAACATACCCTCCTGTCGTTGCTTCGGCGGGCACGCCCGCCGGAGGTTCAAAACTCTTATTTTTTTCAGTATCTCTGAGCCTAAAAGACAAATAATCAAAACTTTCAACAACGGATCTCTTGGTTCTGGCATCGATGAAGAACGCAGCGAAATGCGATAAGTAATGTGAATTGCAGAATTCAGTGAATCATCGAATCTTTGAACGCACATTGCGCCCGCCGGTATTCCGGCGGGCATGCCTGTTCGAGCGTCATTTCAACCCTCAAGCCTCGGCTTGGTGTTGGGGCGCCCGGGCCCTCCGCGGCCCGGGGCCCCCAAGTTCATCGGCGGGCTCGTCGGTTCACTGAGCGCAGTAAAACGCG…	Eukaryota	Fungi	Ascomycota	Pezizomycotina	Sordariomycetes	Sordariomycetidae	NA	Magnaporthales	NA	NA	NA	Pyriculariaceae	Pyricularia	Pyricularia oryzae	Tanzania	-6.4	34.9
NCBI	MN203018	NA	AGGGATCATTACTGAGTTGAAAAACTCCAACCCCTGTGAACATAACCTCCTGTCGTTGCTTCGGCGGGCACGCCCGCCGGAGGTTCAAAACTCTTATTTTTTTCAGTATCTCTGAGCCTAAAAGACAAATAATCAAAACTTTCAACAACGGATCTCTTGGTTCTGGCATCGATGAAGAACGCAGCGAAATGCGATAAGTAATGTGAATTGCAGAATTCAGTGAATCATCGAATCTTTGAACGCACATTGCGCCCGCCGGTATTCCGGCGGGCATGCCTGTTCGAGCGTCATTTCAACCCTCAAGCCTCGGCTTGGTGTTGGGGCGCCCGGGCCCTCCGCGGCCCGGGGCCCCCAAGTTCATCGGCGGGCTCGTCGGTTCACTGAGCGCAGTAAAACGCG…	Eukaryota	Fungi	Ascomycota	Pezizomycotina	Sordariomycetes	Sordariomycetidae	NA	Magnaporthales	NA	NA	NA	Pyriculariaceae	Pyricularia	Pyricularia oryzae	Tanzania	-6.4	34.9
NCBI	MN203017	NA	AGGGATCATTACTGAGTTGAAAAACTCCAACCCCTGTGAACATACCCTCCTGTCGTTGCTTCGGCGGGCACGCCCGCCGGAGGTTCAAAACTCTTATTTTTTTCAGTATCTCTGAGCCTAAAAGACAAATAATCAAAACTTTCAACAACGGATCTCTTGGTTCTGGCATCGATGAAGAACGCAGCGAAATGCGATAAGTAATGTGAATTGCAGAATTCAGTGAATCATCGAATCTTTGAACGCACATTGCGCCCGCCGGTATTCCGGCGGGCATGCCTGTTCGAGCGTCATTTCAACCCTCAAGCCTCGGCTTGGTGTTGGGGCGCCCGGGCCCTCCGCGGCCCGGGGCCCCCAAGTTCATCGGCGGGCTCGTCGGTACACTGAGCGCAGTAAAACGCG…	Eukaryota	Fungi	Ascomycota	Pezizomycotina	Sordariomycetes	Sordariomycetidae	NA	Magnaporthales	NA	NA	NA	Pyriculariaceae	Pyricularia	Pyricularia oryzae	Tanzania	-6.4	34.9
NCBI	MN203016	NA	AGGGATCATTACTGAGTTGAAAAACTCCAACCCCTGTGAACATACCCTCCTGTCGTTGCTTCGGCGGGCACGCCCGCCGGAGGTTCAAAACTCTTATTTTTTTCAGTATCTCTGAGCCTAAAAGACAAATAATCAAAACTTTCAACAACGGATCTCTTGGTTCTGGCATCGATGAAGAACGCAGCGAAATGCGATAAGTAATGTGAATTGCAGAATTCAGTGAATCATCGAATCTTTGAACGCACATTGCGCCCGCCGGTATTCCGGCGGGCATGCCTGTTCGAGCGTCATTTCAACCCTCAAGCCTCGGCTTGGTGTTGGGGCGCCCGGGCCCTCCGCGGCCCGGGGCCCCCAAGTTCATCGGCGGGCTCGTCGGTACACTGAGCGCAGTAAAACGCG…	Eukaryota	Fungi	Ascomycota	Pezizomycotina	Sordariomycetes	Sordariomycetidae	NA	Magnaporthales	NA	NA	NA	Pyriculariaceae	Pyricularia	Pyricularia oryzae	Tanzania	-6.4	34.9
NCBI	MN203015	NA	AGGGATCATTACTGAGTTGAAAAACTCCAACCCCTGTGAACATACCCTCCTGTCGTTGCTTCGGCGGGCACGCCCGCCGGAGGTTCAAAACTCTTATTTTTTTCAGTATCTCTGAGCCTAAAAGACAAATAATCAAAACTTTCAACAACGGATCTCTTGGTTCTGGCATCGATGAAGAACGCAGCGAAATGCGATAAGTAATGTGAATTGCAGAATTCAGTGAATCATCGAATCTTTGAACGCACATTGCGCCCGCCGGTATTCCGGCGGGCATGCCTGTTCGAGCGTCATTTCAACCCTCAAGCCTCGGCTTGGTGTTGGGGCGCCCGGGCCCTCCGCGGCCCGGGGCCCCCAAGTTCATCGGCGGGCTCGTCGGTACACTGAGCGCAGTAAAACGCG…	Eukaryota	Fungi	Ascomycota	Pezizomycotina	Sordariomycetes	Sordariomycetidae	NA	Magnaporthales	NA	NA	NA	Pyriculariaceae	Pyricularia	Pyricularia oryzae	Tanzania	-6.4	34.9
NCBI	MN203014	NA	AGGGATCATTACTGAGTTGAAAAACTCCAACCCCTGTGAACATACCCTCCTGTCGTTGCTTCGGCGGGCACGCCCGCCGGAGGTTCAAAACTCTTATTTTTTTCAGTATCTCTGAGCCTAAAAGACAAATAATCAAAACTTTCAACAACGGATCTCTTGGTTCTGGCATCGATGAAGAACGCAGCGAAATGCGATAAGTAATGTGAATTGCAGAATTCAGTGAATCATCGAATCTTTGAACGCACATTGCGCCCGCCGGTATTCCGGCGGGCATGCCTGTTCGAGCGTCATTTCAACCCTCAAGCCTCGGCTTGGTGTTGGGGCGCCCGGGCCCTCCGCGGCCCGGGGCCCCCAAGTTCATCGGCGGGCTCGTCGGTTCACTGAGCGCAGTAAAACGCG…	Eukaryota	Fungi	Ascomycota	Pezizomycotina	Sordariomycetes	Sordariomycetidae	NA	Magnaporthales	NA	NA	NA	Pyriculariaceae	Pyricularia	Pyricularia oryzae	Tanzania	-6.4	34.9
NCBI	MN203013	NA	AGGGATCATTACTGAGTTGAAAAACTCCAACCCCTGTGAACATACCCTCCTGTCGTTGCTTCGGCGGGCACGCCCGCCGGAGGTTCAAAACTCTTATTTTTTTCAGTATCTCTGAGCCTAAAAGACAAATAATCAAAACTTTCAACAACGGATCTCTTGGTTCTGGCATCGATGAAGAACGCAGCGAAATGCGATAAGTAATGTGAATTGCAGAATTCAGTGAATCATCGAATCTTTGAACGCACATTGCGCCCGCCGGTATTCCGGCGGGCATGCCTGTTCGAGCGTCATTTCAACCCTCAAGCCTCGGCTTGGTGTTGGGGCGCCCGGGCCCTCCGCGGCCCGGGGCCCCCAAGTTCATCGGCGGGCTCGTCGGTACACTGAGCGCAGTAAAACGCG…	Eukaryota	Fungi	Ascomycota	Pezizomycotina	Sordariomycetes	Sordariomycetidae	NA	Magnaporthales	NA	NA	NA	Pyriculariaceae	Pyricularia	Pyricularia oryzae	Tanzania	-6.4	34.9
NCBI	MN203012	NA	AGGGATCATTACTGAGTTGAAAAACTCCAACCCCTGTGAACATACCCTCCTGTCGTTGCTTCGGCGGGCACGCCCGCCGGAGGTTCAAAACTCTTATTTTTTTCAGTATCTCTGAGCCTAAAAGACAAATAATCAAAACTTTCAACAACGGATCTCTTGGTTCTGGCATCGATGAAGAACGCAGCGAAATGCGATAAGTAATGTGAATTGCAGAATTCAGTGAATCATCGAATCTTTGAACGCACATTGCGCCCGCCGGTATTCCGGCGGGCATGCCTGTTCGAGCGTCATTTCAACCCTCAAGCCTCGGCTTGGTGTTGGGGCGCCCGGGCCCTCCGCGGCCCGGGGCCCCCAAGTTCATCGGCGGGCTCGTCGGTACACTGAGCGCAGTAAAACGCG…	Eukaryota	Fungi	Ascomycota	Pezizomycotina	Sordariomycetes	Sordariomycetidae	NA	Magnaporthales	NA	NA	NA	Pyriculariaceae	Pyricularia	Pyricularia oryzae	Tanzania	-6.4	34.9
NCBI	MN203011	NA	AGGGATCATTACTGAGTTGAAAAACTCCAACCCCTGTGAACATAACCTCCTGTCGTTGCTTCGGCGGGCACGCCCGCCGGAGGTTCAAAACTCTTATTTTTTTCAGTATCTCTGAGCCTAAAAGACAAATAATCAAAACTTTCAACAACGGATCTCTTGGTTCTGGCATCGATGAAGAACGCAGCGAAATGCGATAAGTAATGTGAATTGCAGAATTCAGTGAATCATCGAATCTTTGAACGCACATTGCGCCCGCCGGTATTCCGGCGGGCATGCCTGTTCGAGCGTCATTTCAACCCTCAAGCCTCGGCTTGGTGTTGGGGCGCCCGGGCCCTCCGCGGCCCGGGGCCCCCAAGTTCATCGGCGGGCTCGTCGGTACACTGAGCGCAGTAAAACGCG…	Eukaryota	Fungi	Ascomycota	Pezizomycotina	Sordariomycetes	Sordariomycetidae	NA	Magnaporthales	NA	NA	NA	Pyriculariaceae	Pyricularia	Pyricularia oryzae	Tanzania	-6.4	34.9
NCBI	MN203010	NA	AGGGATCATTACTGAGTTGAAAAACTCCAACCCCTGTGAACATACCCTCCTGTCGTTGCTTCGGCGGGCACGCCCGCCGGAGGTTCAAAACTCTTATTTTTTTCAGTATCTCTGAGCCTAAAAGACAAATAATCAAAACTTTCAACAACGGATCTCTTGGTTCTGGCATCGATGAAGAACGCAGCGAAATGCGATAAGTAATGTGAATTGCAGAATTCAGTGAATCATCGAATCTTTGAACGCACATTGCGCCCGCCGGTATTCCGGCGGGCATGCCTGTTCGAGCGTCATTTCAACCCTCAAGCCTCGGCTTGGTGTTGGGGCGCCCGGGCCCTCCGCGGCCCGGGGCCCCCAAGTTCATCGGCGGGCTCGTCGGTACACTGAGCGCAGTAAAACGCG…	Eukaryota	Fungi	Ascomycota	Pezizomycotina	Sordariomycetes	Sordariomycetidae	NA	Magnaporthales	NA	NA	NA	Pyriculariaceae	Pyricularia	Pyricularia oryzae	Tanzania	-6.4	34.9
NCBI	MN203009	NA	AGGGATCATTACTGAGTTGAAAAACTCCAACCCCTGTGAACATACCCTCCTGTCGTTGCTTCGGCGGGCACGCCCGCCGGAGGTTCAAAACTCTTATTTTTTTCAGTATCTCTGAGCCTAAAAGACAAATAATCAAAACTTTCAACAACGGATCTCTTGGTTCTGGCATCGATGAAGAACGCAGCGAAATGCGATAAGTAATGTGAATTGCAGAATTCAGTGAATCATCGAATCTTTGAACGCACATTGCGCCCGCCGGTATTCCGGCGGGCATGCCTGTTCGAGCGTCATTTCAACCCTCAAGCCTCGGCTTGGTGTTGGGGCGCCCGGGCCCTCCGCGGCCCGGGGCCCCCAAGTTCATCGGCGGGCTCGTCGGTACACTGAGCGCAGTAAAACGCG…	Eukaryota	Fungi	Ascomycota	Pezizomycotina	Sordariomycetes	Sordariomycetidae	NA	Magnaporthales	NA	NA	NA	Pyriculariaceae	Pyricularia	Pyricularia oryzae	Tanzania	-6.4	34.9
NCBI	MN203008	NA	AGGGATCATTACTGAGTTGAAAAACTCCAACCCCTGTGAACATAACCTCCTGTCGTTGCTTCGGCGGGCACGCCCGCCGGAGGTTCAAAACTCTTATTTTTTTCAGTATCTCTGAGCCTAAAAGACAAATAATCAAAACTTTCAACAACGGATCTCTTGGTTCTGGCATCGATGAAGAACGCAGCGAAATGCGATAAGTAATGTGAATTGCAGAATTCAGTGAATCATCGAATCTTTGAACGCACATTGCGCCCGCCGGTATTCCGGCGGGCATGCCTGTTCGAGCGTCATTTCAACCCTCAAGCCTCGGCTTGGTGTTGGGGCGCCCGGGCCCTCCGCGGCCCGGGGCCCCCAAGTTCATCGGCGGGCTCGTCGGTACACTGAGCGCAGTAAAACGCG…	Eukaryota	Fungi	Ascomycota	Pezizomycotina	Sordariomycetes	Sordariomycetidae	NA	Magnaporthales	NA	NA	NA	Pyriculariaceae	Pyricularia	Pyricularia oryzae	Tanzania	-6.4	34.9
NCBI	MN203007	NA	AGGGATCATTACTGAGTTGAAAAACTCCAACCCCTGTGAACATAACCTCCTGTCGTTGCTTCGGCGGGCACGCCCGCCGGAGGTTCAAAACTCTTATTTTTTTCAGTATCTCTGAGCCTAAAAGACAAATAATCAAAACTTTCAACAACGGATCTCTTGGTTCTGGCATCGATGAAGAACGCAGCGAAATGCGATAAGTAATGTGAATTGCAGAATTCAGTGAATCATCGAATCTTTGAACGCACATTGCGCCCGCCGGTATTCCGGCGGGCATGCCTGTTCGAGCGTCATTTCAACCCTCAAGCCTCGGCTTGGTGTTGGGGCGCCCGGGCCCTCCGCGGCCCGGGGCCCCCAAGTTCATCGGCGGGCTCGTCGGTACACTGAGCGCAGTAAAACGCG…	Eukaryota	Fungi	Ascomycota	Pezizomycotina	Sordariomycetes	Sordariomycetidae	NA	Magnaporthales	NA	NA	NA	Pyriculariaceae	Pyricularia	Pyricularia oryzae	Tanzania	-6.4	34.9
NCBI	MN203006	NA	AGGGATCATTACTGAGTTGAAAAACTCCAACCCCTGTGAACATAACCTCCTGTCGTTGCTTCGGCGGGCACGCCCGCCGGAGGTTCAAAACTCTTATTTTTTTCAGTATCTCTGAGCCTAAAAGACAAATAATCAAAACTTTCAACAACGGATCTCTTGGTTCTGGCATCGATGAAGAACGCAGCGAAATGCGATAAGTAATGTGAATTGCAGAATTCAGTGAATCATCGAATCTTTGAACGCACATTGCGCCCGCCGGTATTCCGGCGGGCATGCCTGTTCGAGCGTCATTTCAACCCTCAAGCCTCGGCTTGGTGTTGGGGCGCCCGGGCCCTCCGCGGCCCGGGGCCCCCAAGTTCATCGGCGGGCTCGTCGGTACACTGAGCGCAGTAAAACGCG…	Eukaryota	Fungi	Ascomycota	Pezizomycotina	Sordariomycetes	Sordariomycetidae	NA	Magnaporthales	NA	NA	NA	Pyriculariaceae	Pyricularia	Pyricularia oryzae	Tanzania	-6.4	34.9
NCBI	MN203005	NA	AGGGATCATTACTGAGTTGAAAAACTCCAACCCCTGTGAACATAACCTCCTGCTTCGGCGGGCACGCCCGCCGGAGGTTCAAAACTCTTATTTTTTTCAGTATCTCTGAGCCTAAAAGACAAATAATCAAAACTTTCAACAACGGATCTCTTGGTTCTGGCATCGATGAAGAACGCAGCGAAATGCGATAAGTAATGTGAATTGCAGAATTCAGTGAATCATCGAATCTTTGAACGCACATTGCGCCCGCCGGTATTCCGGCGGGCATGCCTGTTCGAGCGTCATTTCAACCCTCAAGCCTCGGCTTGGTGTTGGGGCGCCCGGGCCCTCCGCGGCCCGGGGCCCCCAAGTTCATCGGCGGGCTCGTCGGTACACTGAGCGCAGTAAAACGCGGTAAAA…	Eukaryota	Fungi	Ascomycota	Pezizomycotina	Sordariomycetes	Sordariomycetidae	NA	Magnaporthales	NA	NA	NA	Pyriculariaceae	Pyricularia	Pyricularia oryzae	Tanzania	-6.4	34.9
NCBI	MN203004	NA	AGGGATCATTACTGAGTTGAAAAACTCCAACCCCTGTGAACATAACCTCCTGTCGTTGCTTCGGCGGGCACGCCCGCCGGAGGTTCAAAACTCTTATTTTTTTCAGTATCTCTGAGCCTAAAAGACAAATAATCAAAACTTTCAACAACGGATCTCTTGGTTCTGGCATCGATGAAGAACGCAGCGAAATGCGATAAGTAATGTGAATTGCAGAATTCAGTGAATCATCGAATCTTTGAACGCACATTGCGCCCGCCGGTATTCCGGCGGGCATGCCTGTTCGAGCGTCATTTCAACCCTCAAGCCTCGGCTTGGTGTTGGGGCGCCCGGGCCCTCCGCGGCCCGGGGCCCCCAAGTTCATCGGCGGGCTCGTCGGTACACTGAGCGCAGTAAAACGCG…	Eukaryota	Fungi	Ascomycota	Pezizomycotina	Sordariomycetes	Sordariomycetidae	NA	Magnaporthales	NA	NA	NA	Pyriculariaceae	Pyricularia	Pyricularia oryzae	Tanzania	-6.4	34.9
NCBI	MN203003	NA	AGGGATCATTACTGAGTTGAAAAACTCCAACCCCTGTGAACATAACCTCCTGTCGTTGCTTCGGCGGGCACGCCCGCCGGAGGTTCAAAACTCTTATTTTTTTCAGTATCTCTGAGCCTAAAAGACAAATAATCAAAACTTTCAACAACGGATCTCTTGGTTCTGGCATCGATGAAGAACGCAGCGAAATGCGATAAGTAATGTGAATTGCAGAATTCAGTGAATCATCGAATCTTTGAACGCACATTGCGCCCGCCGGTATTCCGGCGGGCATGCCTGTTCGAGCGTCATTTCAACCCTCAAGCCTCGGCTTGGTGTTGGGGCGCCCGGGCCCTCCGCGGCCCGGGGCCCCCAAGTTCATCGGCGGGCTCGTCGGTACACTGAGCGCAGTAAAACGCG…	Eukaryota	Fungi	Ascomycota	Pezizomycotina	Sordariomycetes	Sordariomycetidae	NA	Magnaporthales	NA	NA	NA	Pyriculariaceae	Pyricularia	Pyricularia oryzae	Tanzania	-6.4	34.9
NCBI	MN203002	NA	AGGGATCATTACTGAGTTGAAAAACTCCAACCCCTGTGAACATAACCTCCTGTCGTTGCTTCGGCGGGCACGCCCGCCGGAGGTTCAAAACTCTTATTTTTTTCAGTATCTCTGAGCCTAAAAGACAAATAATCAAAACTTTCAACAACGGATCTCTTGGTTCTGGCATCGATGAAGAACGCAGCGAAATGCGATAAGTAATGTGAATTGCAGAATTCAGTGAATCATCGAATCTTTGAACGCACATTGCGCCCGCCGGTATTCCGGCGGGCATGCCTGTTCGAGCGTCATTTCAACCCTCAAGCCTCGGCTTGGTGTTGGGGCGCCCGGGCCCTCCGCGGCCCGGGGCCCCCAAGTTCATCGGCGGGCTCGTCGGTACACTGAGCGCAGTAAAACGCG…	Eukaryota	Fungi	Ascomycota	Pezizomycotina	Sordariomycetes	Sordariomycetidae	NA	Magnaporthales	NA	NA	NA	Pyriculariaceae	Pyricularia	Pyricularia oryzae	Tanzania	-6.4	34.9
NCBI	MN203001	NA	AGGGATCATTACTGAGTTGAAAAACTCCAACCCCTGTGAACATAACCTCCTGTCGTTGCTTCGGCGGGCACGCCCGCCGGAGGTTCAAAACTCTTATTTTTTTCAGTATCTCTGAGCCTAAAAGACAAATAATCAAAACTTTCAACAACGGATCTCTTGGTTCTGGCATCGATGAAGAACGCAGCGAAATGCGATAAGTAATGTGAATTGCAGAATTCAGTGAATCATCGAATCTTTGAACGCACATTGCGCCCGCCGGTATTCCGGCGGGCATGCCTGTTCGAGCGTCATTTCAACCCTCAAGCCTCGGCTTGGTGTTGGGGCGCCCGGGCCCTCCGCGGCCCGGGGCCCCCAAGTTCATCGGCGGGCTCGTCGGTACACTGAGCGCAGTAAAACGCG…	Eukaryota	Fungi	Ascomycota	Pezizomycotina	Sordariomycetes	Sordariomycetidae	NA	Magnaporthales	NA	NA	NA	Pyriculariaceae	Pyricularia	Pyricularia oryzae	Tanzania	-6.4	34.9
NCBI	MN203000	NA	AGGGATCATTACTGAGTTGAAAAACTCCAACCCCTGTGAACATAACCTCCTGTCGTTGCTTCGGCGGGCACGCCCGCCGGAGGTTCAAAACTCTTATTTTTTTCAGTATCTCTGAGCCTAAAAGACAAATAATCAAAACTTTCAACAACGGATCTCTTGGTTCTGGCATCGATGAAGAACGCAGCGAAATGCGATAAGTAATGTGAATTGCAGAATTCAGTGAATCATCGAATCTTTGAACGCACATTGCGCCCGCCGGTATTCCGGCGGGCATGCCTGTTCGAGCGTCATTTCAACCCTCAAGCCTCGGCTTGGTGTTGGGGCGCCCGGGCCCTCCGCGGCCCGGGGCCCCCAAGTTCATCGGCGGGCTCGTCGGTACACTGAGCGCAGTAAAACGCG…	Eukaryota	Fungi	Ascomycota	Pezizomycotina	Sordariomycetes	Sordariomycetidae	NA	Magnaporthales	NA	NA	NA	Pyriculariaceae	Pyricularia	Pyricularia oryzae	Tanzania	-6.4	34.9
NCBI	MN202999	NA	AGGGATCATTACTGAGTTGAAAAACTCCAACCCCTGTGAACATAACCTCCTGTCGTTGCTTCGGCGGGCACGCCCGCCGGAGGTTCAAAACTCTTATTTTTTTCAGTATCTCTGAGCCTAAAAGACAAATAATCAAAACTTTCAACAACGGATCTCTTGGTTCTGGCATCGATGAAGAACGCAGCGAAATGCGATAAGTAATGTGAATTGCAGAATTCAGTGAATCATCGAATCTTTGAACGCACATTGCGCCCGCCGGTATTCCGGCGGGCATGCCTGTTCGAGCGTCATTTCAACCCTCAAGCCTCGGCTTGGTGTTGGGGCGCCCGGGCCCTCCGCGGCCCGGGGCCCCCAAGTTCATCGGCGGGCTCGTCGGTTCACTGAGCGCAGTAAAACGCG…	Eukaryota	Fungi	Ascomycota	Pezizomycotina	Sordariomycetes	Sordariomycetidae	NA	Magnaporthales	NA	NA	NA	Pyriculariaceae	Pyricularia	Pyricularia oryzae	Tanzania	-6.4	34.9
NCBI	MN202998	NA	AGGGATCATTACTGAGTTGAAAAACTCCAACCCCTGTGAACATAACCTCCTGTCGTTGCTTCGGCGGGCACGCCCGCCGGAGGTTCAAAACTCTTATTTTTTTCAGTATCTCTGAGCCTAAAAGACAAATAATCAAAACTTTCAACAACGGATCTCTTGGTTCTGGCATCGATGAAGAACGCAGCGAAATGCGATAAGTAATGTGAATTGCAGAATTCAGTGAATCATCGAATCTTTGAACGCACATTGCGCCCGCCGGTATTCCGGCGGGCATGCCTGTTCGAGCGTCATTTCAACCCTCAAGCCTCGGCTTGGTGTTGGGGCGCCCGGGCCCTCCGCGGCCCGGGGCCCCCAAGTTCATCGGCGGGCTCGTCGGTACACTGAGCGCAGTAAAACGCG…	Eukaryota	Fungi	Ascomycota	Pezizomycotina	Sordariomycetes	Sordariomycetidae	NA	Magnaporthales	NA	NA	NA	Pyriculariaceae	Pyricularia	Pyricularia oryzae	Tanzania	-6.4	34.9
NCBI	MN202997	NA	AGGGATCATTACTGAGTTGAAAAACTCCAACCCCTGTGAACATAACCTCCTGTCGTTGCTTCGGCGGGCACGCCCGCCGGAGGTTCAAAACTCTTATTTTTTTCAGTATCTCTGAGCCTAAAAGACAAATAATCAAAACTTTCAACAACGGATCTCTTGGTTCTGGCATCGATGAAGAACGCAGCGAAATGCGATAAGTAATGTGAATTGCAGAATTCAGTGAATCATCGAATCTTTGAACGCACATTGCGCCCGCCGGTATTCCGGCGGGCATGCCTGTTCGAGCGTCATTTCAACCCTCAAGCCTCGGCTTGGTGTTGGGGCGCCCGGGCCCTCCGCGGCCCGGGGCCCCCAAGTTCATCGGCGGGCTCGTCGGTACACTGAGCGCAGTAAAACGCG…	Eukaryota	Fungi	Ascomycota	Pezizomycotina	Sordariomycetes	Sordariomycetidae	NA	Magnaporthales	NA	NA	NA	Pyriculariaceae	Pyricularia	Pyricularia oryzae	Tanzania	-6.4	34.9
NCBI	MN202996	NA	AGGGATCATTACTGAGTTGAAAAACTCCAACCCCTGTGAACATACCCTCCTGTCGTTGCTTCGGCGGGCACGCCCGCCGGAGGTTCAAAACTCTTATTTTTTTCAGTATCTCTGAGCCTAAAAGACAAATAATCAAAACTTTCAACAACGGATCTCTTGGTTCTGGCATCGATGAAGAACGCAGCGAAATGCGATAAGTAATGTGAATTGCAGAATTCAGTGAATCATCGAATCTTTGAACGCACATTGCGCCCGCCGGTATTCCGGCGGGCATGCCTGTTCGAGCGTCATTTCAACCCTCAAGCCTCGGCTTGGTGTTGGGGCGCCCGGGCCCTCCGCGGCCCGGGGCCCCCAAGTTCATCGGCGGGCTCGTCGGTTCACTGAGCGCAGTAAAACGCG…	Eukaryota	Fungi	Ascomycota	Pezizomycotina	Sordariomycetes	Sordariomycetidae	NA	Magnaporthales	NA	NA	NA	Pyriculariaceae	Pyricularia	Pyricularia oryzae	Tanzania	-6.4	34.9
NCBI	MN202995	NA	AGGGATCATTACTGAGTTGAAAAACTCCAACCCCTGTGAACATAACCTCCTGTCGTTGCTTCGGCGGGCACGCCCGCCGGAGGTTCAAAACTCTTATTTTTTTCAGTATCTCTGAGCCTAAAAGACAAATAATCAAAACTTTCAACAACGGATCTCTTGGTTCTGGCATCGATGAAGAACGCAGCGAAATGCGATAAGTAATGTGAATTGCAGAATTCAGTGAATCATCGAATCTTTGAACGCACATTGCGCCCGCCGGTATTCCGGCGGGCATGCCTGTTCGAGCGTCATTTCAACCCTCAAGCCTCGGCTTGGTGTTGGGGCGCCCGGGCCCTCCGCGGCCCGGGGCCCCCAAGTTCATCGGCGGGCTCGTCGGTACACTGAGCGCAGTAAAACGCG…	Eukaryota	Fungi	Ascomycota	Pezizomycotina	Sordariomycetes	Sordariomycetidae	NA	Magnaporthales	NA	NA	NA	Pyriculariaceae	Pyricularia	Pyricularia oryzae	Tanzania	-6.4	34.9
NCBI	MN202994	NA	AGGGATCATTACTGAGTTGAAAAACTCCAACCCCTGTGAACATAACCTCCTGTCGTTGCTTCGGCGGGCACGCCCGCCGGAGGTTCAAAACTCTTATTTTTTTCAGTATCTCTGAGCCTAAAAGACAAATAATCAAAACTTTCAACAACGGATCTCTTGGTTCTGGCATCGATGAAGAACGCAGCGAAATGCGATAAGTAATGTGAATTGCAGAATTCAGTGAATCATCGAATCTTTGAACGCACATTGCGCCCGCCGGTATTCCGGCGGGCATGCCTGTTCGAGCGTCATTTCAACCCTCAAGCCTCGGCTTGGTGTTGGGGCGCCCGGGCCCTCCGCGGCCCGGGGCCCCCAAGTTCATCGGCGGGCTCGTCGGTACACTGAGCGCAGTAAAACGCG…	Eukaryota	Fungi	Ascomycota	Pezizomycotina	Sordariomycetes	Sordariomycetidae	NA	Magnaporthales	NA	NA	NA	Pyriculariaceae	Pyricularia	Pyricularia oryzae	Tanzania	-6.4	34.9
NCBI	MN202993	NA	AGGGATCATTACTGAGTTGAAAAACTCCAACCCCTGTGAACATAACCTCCTGTCGTTGCTTCGGCGGGCACGCCCGCCGGAGGTTCAAAACTCTTATTTTTTTCAGTATCTCTGAGCCTAAAAGACAAATAATCAAAACTTTCAACAACGGATCTCTTGGTTCTGGCATCGATGAAGAACGCAGCGAAATGCGATAAGTAATGTGAATTGCAGAATTCAGTGAATCATCGAATCTTTGAACGCACATTGCGCCCGCCGGTATTCCGGCGGGCATGCCTGTTCGAGCGTCATTTCAACCCTCAAGCCTCGGCTTGGTGTTGGGGCGCCCGGGCCCTCCGCGGCCCGGGGCCCCCAAGTTCATCGGCGGGCTCGTCGGTTCACTGAGCGCAGTAAAACGCG…	Eukaryota	Fungi	Ascomycota	Pezizomycotina	Sordariomycetes	Sordariomycetidae	NA	Magnaporthales	NA	NA	NA	Pyriculariaceae	Pyricularia	Pyricularia oryzae	Tanzania	-6.4	34.9
NCBI	MN202992	NA	AGGGATCATTACTGAGTTGAAAAACTCCAACCCCTGTGAACATAACCTCCTGTCGTTGCTTCGGCGGGCACGCCCGCCGGAGGTTCAAAACTCTTATTTTTTTCAGTATCTCTGAGCCTAAAAGACAAATAATCAAAACTTTCAACAACGGATCTCTTGGTTCTGGCATCGATGAAGAACGCAGCGAAATGCGATAAGTAATGTGAATTGCAGAATTCAGTGAATCATCGAATCTTTGAACGCACATTGCGCCCGCCGGTATTCCGGCGGGCATGCCTGTTCGAGCGTCATTTCAACCCTCAAGCCTCGGCTTGGTGTTGGGGCGCCCGGGCCCTCCGCGGCCCGGGGCCCCCAAGTTCATCGGCGGGCTCGTCGGTACACTGAGCGCAGTAAAACGCG…	Eukaryota	Fungi	Ascomycota	Pezizomycotina	Sordariomycetes	Sordariomycetidae	NA	Magnaporthales	NA	NA	NA	Pyriculariaceae	Pyricularia	Pyricularia oryzae	Tanzania	-6.4	34.9
NCBI	MN202991	NA	AGGGATCATTACTGAGTTGAAAAACTCCAACCCCTGTGAACATAACCTCCTGTCGTTGCTTCGGCGGGCACGCCCGCCGGAGGTTCAAAACTCTTATTTTTTTCAGTATCTCTGAGCCTAAAAGACAAATAATCAAAACTTTCAACAACGGATCTCTTGGTTCTGGCATCGATGAAGAACGCAGCGAAATGCGATAAGTAATGTGAATTGCAGAATTCAGTGAATCATCGAATCTTTGAACGCACATTGCGCCCGCCGGTATTCCGGCGGGCATGCCTGTTCGAGCGTCATTTCAACCCTCAAGCCTCGGCTTGGTGTTGGGGCGCCCGGGCCCTCCGCGGCCCGGGGCCCCCAAGTTCATCGGCGGGCTCGTCGGTACACTGAGCGCAGTAAAACGCG…	Eukaryota	Fungi	Ascomycota	Pezizomycotina	Sordariomycetes	Sordariomycetidae	NA	Magnaporthales	NA	NA	NA	Pyriculariaceae	Pyricularia	Pyricularia oryzae	Tanzania	-6.4	34.9
NCBI	MN202990	NA	AGGGATCATTACTGAGTTGAAAAACTCCAACCCCTGTGAACATAACCTCCTGTCGTTGCTTCGGCGGGCACGCCCGCCGGAGGTTCAAAACTCTTATTTTTTTCAGTATCTCTGAGCCTAAAAGACAAATAATCAAAACTTTCAACAACGGATCTCTTGGTTCTGGCATCGATGAAGAACGCAGCGAAATGCGATAAGTAATGTGAATTGCAGAATTCAGTGAATCATCGAATCTTTGAACGCACATTGCGCCCGCCGGTATTCCGGCGGGCATGCCTGTTCGAGCGTCATTTCAACCCTCAAGCCTCGGCTTGGTGTTGGGGCGCCCGGGCCCTCCGCGGCCCGGGGCCCCCAAGTTCATCGGCGGGCTCGTCGGTTCACTGAGCGCAGTAAAACGCG…	Eukaryota	Fungi	Ascomycota	Pezizomycotina	Sordariomycetes	Sordariomycetidae	NA	Magnaporthales	NA	NA	NA	Pyriculariaceae	Pyricularia	Pyricularia oryzae	Tanzania	-6.4	34.9
NCBI	MN202989	NA	AGGGATCATTACTGAGTTGAAAAACTCCAACCCCTGTGAACATAACCTCCTGTCGTTGCTTCGGCGGGCACGCCCGCCGGAGGTTCAAAACTCTTATTTTTTTCAGTATCTCTGAGCCTAAAAGACAAATAATCAAAACTTTCAACAACGGATCTCTTGGTTCTGGCATCGATGAAGAACGCAGCGAAATGCGATAAGTAATGTGAATTGCAGAATTCAGTGAATCATCGAATCTTTGAACGCACATTGCGCCCGCCGGTATTCCGGCGGGCATGCCTGTTCGAGCGTCATTTCAACCCTCAAGCCTCGGCTTGGTGTTGGGGCGCCCGGGCCCTCCGCGGCCCGGGGCCCCCAAGTTCATCGGCGGGCTCGTCGGTACACTGAGCGCAGTAAAACGCG…	Eukaryota	Fungi	Ascomycota	Pezizomycotina	Sordariomycetes	Sordariomycetidae	NA	Magnaporthales	NA	NA	NA	Pyriculariaceae	Pyricularia	Pyricularia oryzae	Tanzania	-6.4	34.9
NCBI	MN202988	NA	AGGGATCATTACTGAGTTGAAAAACTCCAACCCCTGTGAACATAACCTCCTGTCGTTGCTTCGGCGGGCACGCCCGCCGGAGGTTCAAAACTCTTATTTTTTTCAGTATCTCTGAGCCTAAAAGACAAATAATCAAAACTTTCAACAACGGATCTCTTGGTTCTGGCATCGATGAAGAACGCAGCGAAATGCGATAAGTAATGTGAATTGCAGAATTCAGTGAATCATCGAATCTTTGAACGCACATTGCGCCCGCCGGTATTCCGGCGGGCATGCCTGTTCGAGCGTCATTTCAACCCTCAAGCCTCGGCTTGGTGTTGGGGCGCCCGGGCCCTCCGCGGCCCGGGGCCCCCAAGTTCATCGGCGGGCTCGTCGGTACACTGAGCGCAGTAAAACGCG…	Eukaryota	Fungi	Ascomycota	Pezizomycotina	Sordariomycetes	Sordariomycetidae	NA	Magnaporthales	NA	NA	NA	Pyriculariaceae	Pyricularia	Pyricularia oryzae	Tanzania	-6.4	34.9
NCBI	MN202987	NA	AGGGATCATTACTGAGTTGAAAAACTCCAACCCCTGTGAACATAACCTCCTGTCGTTGCTTCGGCGGGCACGCCCGCCGGAGGTTCAAAACTCTTATTTTTTTCAGTATCTCTGAGCCTAAAAGACAAATAATCAAAACTTTCAACAACGGATCTCTTGGTTCTGGCATCGATGAAGAACGCAGCGAAATGCGATAAGTAATGTGAATTGCAGAATTCAGTGAATCATCGAATCTTTGAACGCACATTGCGCCCGCCGGTATTCCGGCGGGCATGCCTGTTCGAGCGTCATTTCAACCCTCAAGCCTCGGCTTGGTGTTGGGGCGCCCGGGCCCTCCGCGGCCCGGGGCCCCCAAGTTCATCGGCGGGCTCGTCGGTACACTGAGCGCAGTAAAACGCG…	Eukaryota	Fungi	Ascomycota	Pezizomycotina	Sordariomycetes	Sordariomycetidae	NA	Magnaporthales	NA	NA	NA	Pyriculariaceae	Pyricularia	Pyricularia oryzae	Tanzania	-6.4	34.9
NCBI	MN202986	NA	AGGGATCATTACTGAGTTGAAAAACTCCAACCCCTGTGAACATAACCTCCTGTCGTTGCTTCGGCGGGCACGCCCGCCGGAGGTTCAAAACTCTTATTTTTTTCAGTATCTCTGAGCCTAAAAGACAAATAATCAAAACTTTCAACAACGGATCTCTTGGTTCTGGCATCGATGAAGAACGCAGCGAAATGCGATAAGTAATGTGAATTGCAGAATTCAGTGAATCATCGAATCTTTGAACGCACATTGCGCCCGCCGGTATTCCGGCGGGCATGCCTGTTCGAGCGTCATTTCAACCCTCAAGCCTCGGCTTGGTGTTGGGGCGCCCGGGCCCTCCGCGGCCCGGGGCCCCCAAGTTCATCGGCGGGCTCGTCGGTACACTGAGCGCAGTAAAACGCG…	Eukaryota	Fungi	Ascomycota	Pezizomycotina	Sordariomycetes	Sordariomycetidae	NA	Magnaporthales	NA	NA	NA	Pyriculariaceae	Pyricularia	Pyricularia oryzae	Tanzania	-6.4	34.9
NCBI	MN202985	NA	AGGGATCATTACTGAGTTGAAAAACTCCAACCCCTGTGAACATAACCTCCTGTCGTTGCTTCGGCGGGCACGCCCGCCGGAGGTTCAAAACTCTTATTTTTTTCAGTATCTCTGAGCCTAAAAGACAAATAATCAAAACTTTCAACAACGGATCTCTTGGTTCTGGCATCGATGAAGAACGCAGCGAAATGCGATAAGTAATGTGAATTGCAGAATTCAGTGAATCATCGAATCTTTGAACGCACATTGCGCCCGCCGGTATTCCGGCGGGCATGCCTGTTCGAGCGTCATTTCAACCCTCAAGCCTCGGCTTGGTGTTGGGGCGCCCGGGCCCTCCGCGGCCCGGGGCCCCCAAGTTCATCGGCGGGCTCGTCGGTACACTGAGCGCAGTAAAACGCG…	Eukaryota	Fungi	Ascomycota	Pezizomycotina	Sordariomycetes	Sordariomycetidae	NA	Magnaporthales	NA	NA	NA	Pyriculariaceae	Pyricularia	Pyricularia oryzae	Tanzania	-6.4	34.9
NCBI	MN202984	NA	AGGGATCATTACTGAGTTGAAAAACTCCAACCCCTGTGAACATAACCTCCTGTCGTTGCTTCGGCGGGCACGCCCGCCGGAGGTTCAAAACTCTTATTTTTTTCAGTATCTCTGAGCCTAAAAGACAAATAATCAAAACTTTCAACAACGGATCTCTTGGTTCTGGCATCGATGAAGAACGCAGCGAAATGCGATAAGTAATGTGAATTGCAGAATTCAGTGAATCATCGAATCTTTGAACGCACATTGCGCCCGCCGGTATTCCGGCGGGCATGCCTGTTCGAGCGTCATTTCAACCCTCAAGCCTCGGCTTGGTGTTGGGGCGCCCGGGCCCTCCGCGGCCCGGGGCCCCCAAGTTCATCGGCGGGCTCGTCGGTACACTGAGCGCAGTAAAACGCG…	Eukaryota	Fungi	Ascomycota	Pezizomycotina	Sordariomycetes	Sordariomycetidae	NA	Magnaporthales	NA	NA	NA	Pyriculariaceae	Pyricularia	Pyricularia oryzae	Tanzania	-6.4	34.9
NCBI	MN202983	NA	AGGGATCATTACTGAGTTGAAAAACTCCAACCCCTGTGAACATAACCTCCTGTCGTTGCTTCGGCGGGCACGCCCGCCGGAGGTTCAAAACTCTTATTTTTTTCAGTATCTCTGAGCCTAAAAGACAAATAATCAAAACTTTCAACAACGGATCTCTTGGTTCTGGCATCGATGAAGAACGCAGCGAAATGCGATAAGTAATGTGAATTGCAGAATTCAGTGAATCATCGAATCTTTGAACGCACATTGCGCCCGCCGGTATTCCGGCGGGCATGCCTGTTCGAGCGTCATTTCAACCCTCAAGCCTCGGCTTGGTGTTGGGGCGCCCGGGCCCTCCGCGGCCCGGGGCCCCCAAGTTCATCGGCGGGCTCGTCGGTACACTGAGCGCAGTAAAACGCG…	Eukaryota	Fungi	Ascomycota	Pezizomycotina	Sordariomycetes	Sordariomycetidae	NA	Magnaporthales	NA	NA	NA	Pyriculariaceae	Pyricularia	Pyricularia oryzae	Tanzania	-6.4	34.9
NCBI	MN202982	NA	AGGGATCATTACTGAGTTGAAAAACTCCAACCCCTGTGAACATAACCTCCTGTCGTTGCTTCGGCGGGCACGCCCGCCGGAGGTTCAAAACTCTTATTTTTTTCAGTATCTCTGAGCCTAAAAGACAAATAATCAAAACTTTCAACAACGGATCTCTTGGTTCTGGCATCGATGAAGAACGCAGCGAAATGCGATAAGTAATGTGAATTGCAGAATTCAGTGAATCATCGAATCTTTGAACGCACATTGCGCCCGCCGGTATTCCGGCGGGCATGCCTGTTCGAGCGTCATTTCAACCCTCAAGCCTCGGCTTGGTGTTGGGGCGCCCGGGCCCTCCGCGGCCCGGGGCCCCCAAGTTCATCGGCGGGCTCGTCGGTACACTGAGCGCAGTAAAACGCG…	Eukaryota	Fungi	Ascomycota	Pezizomycotina	Sordariomycetes	Sordariomycetidae	NA	Magnaporthales	NA	NA	NA	Pyriculariaceae	Pyricularia	Pyricularia oryzae	Tanzania	-6.4	34.9
NCBI	MN202981	NA	AGGGATCATTACTGAGTTGAAAAACTCCAACCCCTGTGAACATAACCTCCTGTCGTTGCTTCGGCGGGCACGCCCGCCGGAGGTTCAAAACTCTTATTTTTTTCAGTATCTCTGAGCCTAAAAGACAAATAATCAAAACTTTCAACAACGGATCTCTTGGTTCTGGCATCGATGAAGAACGCAGCGAAATGCGATAAGTAATGTGAATTGCAGAATTCAGTGAATCATCGAATCTTTGAACGCACATTGCGCCCGCCGGTATTCCGGCGGGCATGCCTGTTCGAGCGTCATTTCAACCCTCAAGCCTCGGCTTGGTGTTGGGGCGCCCGGGCCCTCCGCGGCCCGGGGCCCCCAAGTTCATCGGCGGGCTCGTCGGTACACTGAGCGCAGTAAAACGCG…	Eukaryota	Fungi	Ascomycota	Pezizomycotina	Sordariomycetes	Sordariomycetidae	NA	Magnaporthales	NA	NA	NA	Pyriculariaceae	Pyricularia	Pyricularia oryzae	Tanzania	-6.4	34.9
NCBI	MN202980	NA	AGGGATCATTACTGAGTTGAAAAACTCCAACCCCTGTGAACATAACCTCCTGTCGTTGCTTCGGCGGGCACGCCCGCCGGAGGTTCAAAACTCTTATTTTTTTCAGTATCTCTGAGCCTAAAAGACAAATAATCAAAACTTTCAACAACGGATCTCTTGGTTCTGGCATCGATGAAGAACGCAGCGAAATGCGATAAGTAATGTGAATTGCAGAATTCAGTGAATCATCGAATCTTTGAACGCACATTGCGCCCGCCGGTATTCCGGCGGGCATGCCTGTTCGAGCGTCATTTCAACCCTCAAGCCTCGGCTTGGTGTTGGGGCGCCCGGGCCCTCCGCGGCCCGGGGCCCCCAAGTTCATCGGCGGGCTCGTCGGTACACTGAGCGCAGTAAAACGCG…	Eukaryota	Fungi	Ascomycota	Pezizomycotina	Sordariomycetes	Sordariomycetidae	NA	Magnaporthales	NA	NA	NA	Pyriculariaceae	Pyricularia	Pyricularia oryzae	Tanzania	-6.4	34.9
NCBI	MN203095	NA	AGGGATCATTACTGAGTTGAAAAACTCCAACCCCTGTGAACATAACCTCCTGTCGTTGCTTCGGCGGGCACGCCCGCCGGAGGTTCAAAACTCTTATTTTTTTCAGTATCTCTGAGCCTAAAAGACAAATAATCAAAACTTTCAACAACGGATCTCTTGGTTCTGGCATCGATGAAGAACGCAGCGAAATGCGATAAGTAATGTGAATTGCAGAATTCAGTGAATCATCGAATCTTTGAACGCACATTGCGCCCGCCGGTATTCCGGCGGGCATGCCTGTTCGAGCGTCATTTCAACCCTCAAGCCTCGGCTTGGTGTTGGGGCGCCCGGGCCCTCCGCGGCCCGGGGCCCCCAAGTTCATCGGCGGGCTCGTCGGTTCACTGAGCGCAGTAAAACGCG…	Eukaryota	Fungi	Ascomycota	Pezizomycotina	Sordariomycetes	Sordariomycetidae	NA	Magnaporthales	NA	NA	NA	Pyriculariaceae	Pyricularia	Pyricularia oryzae	Uganda	1.4	32.4
NCBI	MN203094	NA	AGGGATCATTACTGAGTTGAAAAACTCCAACCCCTGTGAACATAACCTCCTGTCGTTGCTTCGGCGGGCACGCCCGCCGGAGGTTCAAAACTCTTATTTTTTTCAGTATCTCTGAGCCTAAAAGACAAATAATCAAAACTTTCAACAACGGATCTCTTGGTTCTGGCATCGATGAAGAACGCAGCGAAATGCGATAAGTAATGTGAATTGCAGAATTCAGTGAATCATCGAATCTTTGAACGCACATTGCGCCCGCCGGTATTCCGGCGGGCATGCCTGTTCGAGCGTCATTTCAACCCTCAAGCCTCGGCTTGGTGTTGGGGCGCCCGGGCCCTCCGCGGCCCGGGGCCCCCAAGTTCATCGGCGGGCTCGTCGGTTCACTGAGCGCAGTAAAACGCG…	Eukaryota	Fungi	Ascomycota	Pezizomycotina	Sordariomycetes	Sordariomycetidae	NA	Magnaporthales	NA	NA	NA	Pyriculariaceae	Pyricularia	Pyricularia oryzae	Uganda	1.4	32.4
NCBI	MN203093	NA	AGGGATCATTACTGAGTTGAAAAACTCCAACCCCTGTGAACATAACCTCCTGTCGTTGCTTCGGCGGGCACGCCCGCCGGAGGTTCAAAACTCTTATTTTTTTCAGTATCTCTGAGCCTAAAAGACAAATAATCAAAACTTTCAACAACGGATCTCTTGGTTCTGGCATCGATGAAGAACGCAGCGAAATGCGATAAGTAATGTGAATTGCAGAATTCAGTGAATCATCGAATCTTTGAACGCACATTGCGCCCGCCGGTATTCCGGCGGGCATGCCTGTTCGAGCGTCATTTCAACCCTCAAGCCTCGGCTTGGTGTTGGGGCGCCCGGGCCCTCCGCGGCCCGGGGCCCCCAAGTTCATCGGCGGGCTCGTCGGTTCACTGAGCGCAGTAAAACGCG…	Eukaryota	Fungi	Ascomycota	Pezizomycotina	Sordariomycetes	Sordariomycetidae	NA	Magnaporthales	NA	NA	NA	Pyriculariaceae	Pyricularia	Pyricularia oryzae	Uganda	1.4	32.4
NCBI	MN203092	NA	AGGGATCATTACTGAGTTGAAAAACTCCAACCCCTGTGAACATAACCTCCTGTCGTTGCTTCGGCGGGCACGCCCGCCGGAGGTTCAAAACTCTTATTTTTTTCAGTATCTCTGAGCCTAAAAGACAAATAATCAAAACTTTCAACAACGGATCTCTTGGTTCTGGCATCGATGAAGAACGCAGCGAAATGCGATAAGTAATGTGAATTGCAGAATTCAGTGAATCATCGAATCTTTGAACGCACATTGCGCCCGCCGGTATTCCGGCGGGCATGCCTGTTCGAGCGTCATTTCAACCCTCAAGCCTCGGCTTGGTGTTGGGGCGCCCGGGCCCTCCGCGGCCCGGGGCCCCCAAGTTCATCGGCGGGCTCGTCGGTTCACTGAGCGCAGTAAAACGCG…	Eukaryota	Fungi	Ascomycota	Pezizomycotina	Sordariomycetes	Sordariomycetidae	NA	Magnaporthales	NA	NA	NA	Pyriculariaceae	Pyricularia	Pyricularia oryzae	Uganda	1.4	32.4
NCBI	MN203091	NA	AGGGATCATTACTGAGTTGAAAAACTCCAACCCCTGTGAACATAACCTCCTGTCGTTGCTTCGGCGGGCACGCCCGCCGGAGGTTCAAAACTCTTATTTTTTTCAGTATCTCTGAGCCTAAAAGACAAATAATCAAAACTTTCAACAACGGATCTCTTGGTTCTGGCATCGATGAAGAACGCAGCGAAATGCGATAAGTAATGTGAATTGCAGAATTCAGTGAATCATCGAATCTTTGAACGCACATTGCGCCCGCCGGTATTCCGGCGGGCATGCCTGTTCGAGCGTCATTTCAACCCTCAAGCCTCGGCTTGGTGTTGGGGCGCCCGGGCCCTCCGCGGCCCGGGGCCCCCAAGTTCATCGGCGGGCTCGTCGGTTCACTGAGCGCAGTAAAACGCG…	Eukaryota	Fungi	Ascomycota	Pezizomycotina	Sordariomycetes	Sordariomycetidae	NA	Magnaporthales	NA	NA	NA	Pyriculariaceae	Pyricularia	Pyricularia oryzae	Uganda	1.4	32.4
NCBI	MN203090	NA	AGGGATCATTACTGAGTTGAAAAACTCCAACCCCTGTGAACATAACCTTCTGTCGTTGCTTCGGCGGGCACGCCCGCCGGAGGTTCAAAACTCTTATTTTTTTCAGTATCTCTGAGCCTAAAAGACAAATAATCAAAACTTTCAACAACGGATCTCTTGGTTCTGGCATCGATGAAGAACGCAGCGAAATGCGATAAGTAATGTGAATTGCAGAATTCAGTGAATCATCGAATCTTTGAACGCACATTGCGCCCGCCGGTATTCCGGCGGGCATGCCTGTTCGAGCGTCATTTCAACCCTCAAGCCTCGGCTTGGTGTTGGGGCGCCCGGGCCCTCCGCGGCCCGGGGCCCCCAAGTTCATCGGCGGGCTCGTCGGTTCACTGAGCGCAGTAAAACGCG…	Eukaryota	Fungi	Ascomycota	Pezizomycotina	Sordariomycetes	Sordariomycetidae	NA	Magnaporthales	NA	NA	NA	Pyriculariaceae	Pyricularia	Pyricularia oryzae	Uganda	1.4	32.4
NCBI	MN203089	NA	AGGGATCATTACTGAGTTGAAAAACTCCAACCCCTGTGAACATAACCTCCTGTCGTTGCTTCGGCGGGCACGCCCGCCGGAGGTTCAAAACTCTTATTTTTTTCAGTATCTCTGAGCCTAAAAGACAAATAATCAAAACTTTCAACAACGGATCTCTTGGTTCTGGCATCGATGAAGAACGCAGCGAAATGCGATAAGTAATGTGAATTGCAGAATTCAGTGAATCATCGAATCTTTGAACGCACATTGCGCCCGCCGGTATTCCGGCGGGCATGCCTGTTCGAGCGTCATTTCAACCCTCAAGCCTCGGCTTGGTGTTGGGGCGCCCGGGCCCTCCGCGGCCCGGGGCCCCCAAGTTCATCGGCGGGCTCGTCGGTTCACTGAGCGCAGTAAAACGCG…	Eukaryota	Fungi	Ascomycota	Pezizomycotina	Sordariomycetes	Sordariomycetidae	NA	Magnaporthales	NA	NA	NA	Pyriculariaceae	Pyricularia	Pyricularia oryzae	Uganda	1.4	32.4
NCBI	MN203088	NA	AGGGATCATTACTGAGTTGAAAAACTCCAACCCCTGTGAACATAACCTCCTGTCGTTGCTTCGGCGGGCACGCCCGCCGGAGGTTCAAAACTCTTATTTTTTTCAGTATCTCTGAGCCTAAAAGACAAATAATCAAAACTTTCAACAACGGATCTCTTGGTTCTGGCATCGATGAAGAACGCAGCGAAATGCGATAAGTAATGTGAATTGCAGAATTCAGTGAATCATCGAATCTTTGAACGCACATTGCGCCCGCCGGTATTCCGGCGGGCATGCCTGTTCGAGCGTCATTTCAACCCTCAAGCCTCGGCTTGGTGTTGGGGCGCCCGGGCCCTCCGCGGCCCGGGGCCCCCAAGTTCATCGGCGGGCTCGTCGGTTCACTGAGCGCAGTAAAACGCG…	Eukaryota	Fungi	Ascomycota	Pezizomycotina	Sordariomycetes	Sordariomycetidae	NA	Magnaporthales	NA	NA	NA	Pyriculariaceae	Pyricularia	Pyricularia oryzae	Uganda	1.4	32.4
NCBI	MN203087	NA	AGGGATCATTACTGAGTTGAAAAACTCCAACCCCTGTGAACATAACCTTCTGTCGTTGCTTCGGCGGGCACGCCCGCCGGAGGTTCAAAACTCTTATTTTTTTCAGTATCTCTGAGCCTAAAAGACAAATAATCAAAACTTTCAACAACGGATCTCTTGGTTCTGGCATCGATGAAGAACGCAGCGAAATGCGATAAGTAATGTGAATTGCAGAATTCAGTGAATCATCGAATCTTTGAACGCACATTGCGCCCGCCGGTATTCCGGCGGGCATGCCTGTTCGAGCGTCATTTCAACCCTCAAGCCTCGGCTTGGTGTTGGGGCGCCCGGGCCCTCCGCGGCCCGGGGCCCCCAAGTTCATCGGCGGGCTCGTCGGTTCACTGAGCGCAGTAAAACGCG…	Eukaryota	Fungi	Ascomycota	Pezizomycotina	Sordariomycetes	Sordariomycetidae	NA	Magnaporthales	NA	NA	NA	Pyriculariaceae	Pyricularia	Pyricularia oryzae	Uganda	1.4	32.4
NCBI	MN203086	NA	AGGGATCATTACTGAGTTGAAAAACTCCAACCCCTGTGAACATAACCTCCTGTCGTTGCTTCGGCGGGCACGCCCGCCGGAGGTTCAAAACTCTTATTTTTTTCAGTATCTCTGAGCCTAAAAGACAAATAATCAAAACTTTCAACAACGGATCTCTTGGTTCTGGCATCGATGAAGAACGCAGCGAAATGCGATAAGTAATGTGAATTGCAGAATTCAGTGAATCATCGAATCTTTGAACGCACATTGCGCCCGCCGGTATTCCGGCGGGCATGCCTGTTCGAGCGTCATTTCAACCCTCAAGCCTCGGCTTGGTGTTGGGGCGCCCGGGCCCTCCGCGGCCCGGGGCCCCCAAGTTCATCGGCGGGCTCGTCGGTTCACTGAGCGCAGTAAAACGCG…	Eukaryota	Fungi	Ascomycota	Pezizomycotina	Sordariomycetes	Sordariomycetidae	NA	Magnaporthales	NA	NA	NA	Pyriculariaceae	Pyricularia	Pyricularia oryzae	Uganda	1.4	32.4
NCBI	MN203085	NA	AGGGATCATTACTGAGTTGAAAAACTCCAACCCCTGTGAACATAACCTCCTGTCGTTGCTTCGGCGGGCACGCCCGCCGGAGGTTCAAAACTCTTATTTTTTTCAGTATCTCTGAGCCTAAAAGACAAATAATCAAAACTTTCAACAACGGATCTCTTGGTTCTGGCATCGATGAAGAACGCAGCGAAATGCGATAAGTAATGTGAATTGCAGAATTCAGTGAATCATCGAATCTTTGAACGCACATTGCGCCCGCCGGTATTCCGGCGGGCATGCCTGTTCGAGCGTCATTTCAACCCTCAAGCCTCGGCTTGGTGTTGGGGCGCCCGGGCCCTCCGCGGCCCGGGGCCCCCAAGTTCATCGGCGGGCTCGTCGGTTCACTGAGCGCAGTAAAACGCG…	Eukaryota	Fungi	Ascomycota	Pezizomycotina	Sordariomycetes	Sordariomycetidae	NA	Magnaporthales	NA	NA	NA	Pyriculariaceae	Pyricularia	Pyricularia oryzae	Uganda	1.4	32.4
NCBI	MN203084	NA	AGGGATCATTACTGAGTTGAAAAACTCCAACCCCTGTGAACATAACCTCCTGTCGTTGCTTCGGCGGGCACGCCCGCCGGAGGTTCAAAACTCTTATTTTTTTCAGTATCTCTGAGCCTAAAAGACAAATAATCAAAACTTTCAACAACGGATCTCTTGGTTCTGGCATCGATGAAGAACGCAGCGAAATGCGATAAGTAATGTGAATTGCAGAATTCAGTGAATCATCGAATCTTTGAACGCACATTGCGCCCGCCGGTATTCCGGCGGGCATGCCTGTTCGAGCGTCATTTCAACCCTCAAGCCTCGGCTTGGTGTTGGGGCGCCCGGGCCCTCCGCGGCCCGGGGCCCCCAAGTTCATCGGCGGGCTCGTCGGTTCACTGAGCGCAGTAAAACGCG…	Eukaryota	Fungi	Ascomycota	Pezizomycotina	Sordariomycetes	Sordariomycetidae	NA	Magnaporthales	NA	NA	NA	Pyriculariaceae	Pyricularia	Pyricularia oryzae	Uganda	1.4	32.4
NCBI	MN203083	NA	AGGGATCATTACTGAGTTGAAAAACTCCAACCCCTGTGAACATAACCTCCTGTCGTTGCTTCGGCGGGCACGCCCGCCGGAGGTTCAAAACTCTTATTTTTTTCAGTATCTCTGAGCCTAAAAGACAAATAATCAAAACTTTCAACAACGGATCTCTTGGTTCTGGCATCGATGAAGAACGCAGCGAAATGCGATAAGTAATGTGAATTGCAGAATTCAGTGAATCATCGAATCTTTGAACGCACATTGCGCCCGCCGGTATTCCGGCGGGCATGCCTGTTCGAGCGTCATTTCAACCCTCAAGCCTCGGCTTGGTGTTGGGGCGCCCGGGCCCTCCGCGGCCCGGGGCCCCCAAGTTCATCGGCGGGCTCGTCGGTTCACTGAGCGCAGTAAAACGCG…	Eukaryota	Fungi	Ascomycota	Pezizomycotina	Sordariomycetes	Sordariomycetidae	NA	Magnaporthales	NA	NA	NA	Pyriculariaceae	Pyricularia	Pyricularia oryzae	Uganda	1.4	32.4
NCBI	MN203082	NA	AGGGATCATTACTGAGTTGAAAAACTCCAACCCCTGTGAACATAACCTCCTGTCGTTGCTTCGGCGGGCACGCCCGCCGGAGGTTCAAAACTCTTATTTTTTTCAGTATCTCTGAGCCTAAAAGACAAATAATCAAAACTTTCAACAACGGATCTCTTGGTTCTGGCATCGATGAAGAACGCAGCGAAATGCGATAAGTAATGTGAATTGCAGAATTCAGTGAATCATCGAATCTTTGAACGCACATTGCGCCCGCCGGTATTCCGGCGGGCATGCCTGTTCGAGCGTCATTTCAACCCTCAAGCCTCGGCTTGGTGTTGGGGCGCCCGGGCCCTCCGCGGCCCGGGGCCCCCAAGTTCATCGGCGGGCTCGTCGGTTCACTGAGCGCAGTAAAACGCG…	Eukaryota	Fungi	Ascomycota	Pezizomycotina	Sordariomycetes	Sordariomycetidae	NA	Magnaporthales	NA	NA	NA	Pyriculariaceae	Pyricularia	Pyricularia oryzae	Uganda	1.4	32.4
NCBI	MN203081	NA	AGGGATCATTACTGAGTTGAAAAACTCCAACCCCTGTGAACATAACCTCCTGTCGTTGCTTCGGCGGGCACGCCCGCCGGAGGTTCAAAACTCTTATTTTTTTCAGTATCTCTGAGCCTAAAAGACAAATAATCAAAACTTTCAACAACGGATCTCTTGGTTCTGGCATCGATGAAGAACGCAGCGAAATGCGATAAGTAATGTGAATTGCAGAATTCAGTGAATCATCGAATCTTTGAACGCACATTGCGCCCGCCGGTATTCCGGCGGGCATGCCTGTTCGAGCGTCATTTCAACCCTCAAGCCTCGGCTTGGTGTTGGGGCGCCCGGGCCCTCCGCGGCCCGGGGCCCCCAAGTTCATCGGCGGGCTCGTCGGTTCACTGAGCGCAGTAAAACGCG…	Eukaryota	Fungi	Ascomycota	Pezizomycotina	Sordariomycetes	Sordariomycetidae	NA	Magnaporthales	NA	NA	NA	Pyriculariaceae	Pyricularia	Pyricularia oryzae	Uganda	1.4	32.4
NCBI	MN203080	NA	AGGGATCATTACTGAGTTGAAAAACTCCAACCCCTGTGAACATAACCTCCTGTCGTTGCTTCGGCGGGCACGCCCGCCGGAGGTTCAAAACTCTTATTTTTTTCAGTATCTCTGAGCCTAAAAGACAAATAATCAAAACTTTCAACAACGGATCTCTTGGTTCTGGCATCGATGAAGAACGCAGCGAAATGCGATAAGTAATGTGAATTGCAGAATTCAGTGAATCATCGAATCTTTGAACGCACATTGCGCCCGCCGGTATTCCGGCGGGCATGCCTGTTCGAGCGTCATTTCAACCCTCAAGCCTCGGCTTGGTGTTGGGGCGCCCGGGCCCTCCGCGGCCCGGGGCCCCCAAGTTCATCGGCGGGCTCGTCGGTTCACTGAGCGCAGTAAAACGCG…	Eukaryota	Fungi	Ascomycota	Pezizomycotina	Sordariomycetes	Sordariomycetidae	NA	Magnaporthales	NA	NA	NA	Pyriculariaceae	Pyricularia	Pyricularia oryzae	Uganda	1.4	32.4
NCBI	MN203079	NA	AGGGATCATTACTGAGTTGAAAAACTCCAACCCCTGTGAACATAACCTTCTGTCGTTGCTTCGGCGGGCACGCCCGCCGGAGGTTCAAAACTCTTATTTTTTTCAGTATCTCTGAGCCTAAAAGACAAATAATCAAAACTTTCAACAACGGATCTCTTGGTTCTGGCATCGATGAAGAACGCAGCGAAATGCGATAAGTAATGTGAATTGCAGAATTCAGTGAATCATCGAATCTTTGAACGCACATTGCGCCCGCCGGTATTCCGGCGGGCATGCCTGTTCGAGCGTCATTTCAACCCTCAAGCCTCGGCTTGGTGTTGGGGCGCCCGGGCCCTCCGCGGCCCGGGGCCCCCAAGTTCATCGGCGGGCTCGTCGGTTCACTGAGCGCAGTAAAACGCG…	Eukaryota	Fungi	Ascomycota	Pezizomycotina	Sordariomycetes	Sordariomycetidae	NA	Magnaporthales	NA	NA	NA	Pyriculariaceae	Pyricularia	Pyricularia oryzae	Uganda	1.4	32.4
NCBI	MN203078	NA	AGGGATCATTACTGAGTTGAAAAACTCCAACCCCTGTGAACATAACCTCCTGTCGTTGCTTCGGCGGGCACGCCCGCCGGAGGTTCAAAACTCTTATTTTTTTCAGTATCTCTGAGCCTAAAAGACAAATAATCAAAACTTTCAACAACGGATCTCTTGGTTCTGGCATCGATGAAGAACGCAGCGAAATGCGATAAGTAATGTGAATTGCAGAATTCAGTGAATCATCGAATCTTTGAACGCACATTGCGCCCGCCGGTATTCCGGCGGGCATGCCTGTTCGAGCGTCATTTCAACCCTCAAGCCTCGGCTTGGTGTTGGGGCGCCCGGGCCCTCCGCGGCCCGGGGCCCCCAAGTTCATCGGCGGGCTCGTCGGTTCACTGAGCGCAGTAAAACGCG…	Eukaryota	Fungi	Ascomycota	Pezizomycotina	Sordariomycetes	Sordariomycetidae	NA	Magnaporthales	NA	NA	NA	Pyriculariaceae	Pyricularia	Pyricularia oryzae	Uganda	1.4	32.4
NCBI	MN203077	NA	AGGGATCATTACTGAGTTGAAAAACTCCAACCCCTGTGAACATAACCTCCTGTCGTTGCTTCGGCGGGCACGCCCGCCGGAGGTTCAAAACTCTTATTTTTTTCAGTATCTCTGAGCCTAAAAGACAAATAATCAAAACTTTCAACAACGGATCTCTTGGTTCTGGCATCGATGAAGAACGCAGCGAAATGCGATAAGTAATGTGAATTGCAGAATTCAGTGAATCATCGAATCTTTGAACGCACATTGCGCCCGCCGGTATTCCGGCGGGCATGCCTGTTCGAGCGTCATTTCAACCCTCAAGCCTCGGCTTGGTGTTGGGGCGCCCGGGCCCTCCGCGGCCCGGGGCCCCCAAGTTCATCGGCGGGCTCGTCGGTTCACTGAGCGCAGTAAAACGCG…	Eukaryota	Fungi	Ascomycota	Pezizomycotina	Sordariomycetes	Sordariomycetidae	NA	Magnaporthales	NA	NA	NA	Pyriculariaceae	Pyricularia	Pyricularia oryzae	Uganda	1.4	32.4
NCBI	MN203076	NA	AGGGATCATTACTGAGTTGAAAAACTCCAACCCCTGTGAACATAACCTCCTGTCGTTGCTTCGGCGGGCACGCCCGCCGGAGGTTCAAAACTCTTATTTTTTTCAGTATCTCTGAGCCTAAAAGACAAATAATCAAAACTTTCAACAACGGATCTCTTGGTTCTGGCATCGATGAAGAACGCAGCGAAATGCGATAAGTAATGTGAATTGCAGAATTCAGTGAATCATCGAATCTTTGAACGCACATTGCGCCCGCCGGTATTCCGGCGGGCATGCCTGTTCGAGCGTCATTTCAACCCTCAAGCCTCGGCTTGGTGTTGGGGCGCCCGGGCCCTCCGCGGCCCGGGGCCCCCAAGTTCATCGGCGGGCTCGTCGGTTCACTGAGCGCAGTAAAACGCG…	Eukaryota	Fungi	Ascomycota	Pezizomycotina	Sordariomycetes	Sordariomycetidae	NA	Magnaporthales	NA	NA	NA	Pyriculariaceae	Pyricularia	Pyricularia oryzae	Uganda	1.4	32.4
NCBI	MN203075	NA	AGGGATCATTACTGAGTTGAAAAACTCCAACCCCTGTGAACATAACCTCCTGTCGTTGCTTCGGCGGGCACGCCCGCCGGAGGTTCAAAACTCTTATTTTTTTCAGTATCTCTGAGCCTAAAAGACAAATAATCAAAACTTTCAACAACGGATCTCTTGGTTCTGGCATCGATGAAGAACGCAGCGAAATGCGATAAGTAATGTGAATTGCAGAATTCAGTGAATCATCGAATCTTTGAACGCACATTGCGCCCGCCGGTATTCCGGCGGGCATGCCTGTTCGAGCGTCATTTCAACCCTCAAGCCTCGGCTTGGTGTTGGGGCGCCCGGGCCCTCCGCGGCCCGGGGCCCCCAAGTTCATCGGCGGGCTCGTCGGTTCACTGAGCGCAGTAAAACGCG…	Eukaryota	Fungi	Ascomycota	Pezizomycotina	Sordariomycetes	Sordariomycetidae	NA	Magnaporthales	NA	NA	NA	Pyriculariaceae	Pyricularia	Pyricularia oryzae	Uganda	1.4	32.4
NCBI	MN203074	NA	AGGGATCATTACTGAGTTGAAAAACTCCAACCCCTGTGAACATAACCTCCTGTCGTTGCTTCGGCGGGCACGCCCGCCGGAGGTTCAAAACTCTTATTTTTTTCAGTATCTCTGAGCCTAAAAGACAAATAATCAAAACTTTCAACAACGGATCTCTTGGTTCTGGCATCGATGAAGAACGCAGCGAAATGCGATAAGTAATGTGAATTGCAGAATTCAGTGAATCATCGAATCTTTGAACGCACATTGCGCCCGCCGGTATTCCGGCGGGCATGCCTGTTCGAGCGTCATTTCAACCCTCAAGCCTCGGCTTGGTGTTGGGGCGCCCGGGCCCTCCGCGGCCCGGGGCCCCCAAGTTCATCGGCGGGCTCGTCGGTTCACTGAGCGCAGTAAAACGCG…	Eukaryota	Fungi	Ascomycota	Pezizomycotina	Sordariomycetes	Sordariomycetidae	NA	Magnaporthales	NA	NA	NA	Pyriculariaceae	Pyricularia	Pyricularia oryzae	Uganda	1.4	32.4
NCBI	MN203073	NA	AGGGATCATTACTGAGTTGAAAAACTCCAACCCCTGTGAACATAACCTCCTGTCGTTGCTTCGGCGGGCACGCCCGCCGGAGGTTCAAAACTCTTATTTTTTTCAGTATCTCTGAGCCTAAAAGACAAATAATCAAAACTTTCAACAACGGATCTCTTGGTTCTGGCATCGATGAAGAACGCAGCGAAATGCGATAAGTAATGTGAATTGCAGAATTCAGTGAATCATCGAATCTTTGAACGCACATTGCGCCCGCCGGTATTCCGGCGGGCATGCCTGTTCGAGCGTCATTTCAACCCTCAAGCCTCGGCTTGGTGTTGGGGCGCCCGGGCCCTCCGCGGCCCGGGGCCCCCAAGTTCATCGGCGGGCTCGTCGGTTCACTGAGCGCAGTAAAACGCG…	Eukaryota	Fungi	Ascomycota	Pezizomycotina	Sordariomycetes	Sordariomycetidae	NA	Magnaporthales	NA	NA	NA	Pyriculariaceae	Pyricularia	Pyricularia oryzae	Uganda	1.4	32.4
NCBI	MN203072	NA	AGGGATCATTACTGAGTTGAAAAACTCCAACCCCTGTGAACATAACCTTCTGTCGTTGCTTCGGCGGGCACGCCCGCCGGAGGTTCAAAACTCTTATTTTTTTCAGTATCTCTGAGCCTAAAAGACAAATAATCAAAACTTTCAACAACGGATCTCTTGGTTCTGGCATCGATGAAGAACGCAGCGAAATGCGATAAGTAATGTGAATTGCAGAATTCAGTGAATCATCGAATCTTTGAACGCACATTGCGCCCGCCGGTATTCCGGCGGGCATGCCTGTTCGAGCGTCATTTCAACCCTCAAGCCTCGGCTTGGTGTTGGGGCGCCCGGGCCCTCCGCGGCCCGGGGCCCCCAAGTTCATCGGCGGGCTCGTCGGTTCACTGAGCGCAGTAAAACGCG…	Eukaryota	Fungi	Ascomycota	Pezizomycotina	Sordariomycetes	Sordariomycetidae	NA	Magnaporthales	NA	NA	NA	Pyriculariaceae	Pyricularia	Pyricularia oryzae	Uganda	1.4	32.4
NCBI	MN203071	NA	AGGGATCATTACTGAGTTGAAAAACTCCAACCCCTGTGAACATAACCTCCTGTCGTTGCTTCGGCGGGCACGCCCGCCGGAGGTTCAAAACTCTTATTTTTTTCAGTATCTCTGAGCCTAAAAGACAAATAATCAAAACTTTCAACAACGGATCTCTTGGTTCTGGCATCGATGAAGAACGCAGCGAAATGCGATAAGTAATGTGAATTGCAGAATTCAGTGAATCATCGAATCTTTGAACGCACATTGCGCCCGCCGGTATTCCGGCGGGCATGCCTGTTCGAGCGTCATTTCAACCCTCAAGCCTCGGCTTGGTGTTGGGGCGCCCGGGCCCTCCGCGGCCCGGGGCCCCCAAGTTCATCGGCGGGCTCGTCGGTTCACTGAGCGCAGTAAAACGCG…	Eukaryota	Fungi	Ascomycota	Pezizomycotina	Sordariomycetes	Sordariomycetidae	NA	Magnaporthales	NA	NA	NA	Pyriculariaceae	Pyricularia	Pyricularia oryzae	Uganda	1.4	32.4
NCBI	MN203070	NA	AGGGATCATTACTGAGTTGAAAAACTCCAACCCCTGTGAACATAACCTCCTGTCGTTGCTTCGGCGGGCACGCCCGCCGGAGGTTCAAAACTCTTATTTTTTTCAGTATCTCTGAGCCTAAAAGACAAATAATCAAAACTTTCAACAACGGATCTCTTGGTTCTGGCATCGATGAAGAACGCAGCGAAATGCGATAAGTAATGTGAATTGCAGAATTCAGTGAATCATCGAATCTTTGAACGCACATTGCGCCCGCCGGTATTCCGGCGGGCATGCCTGTTCGAGCGTCATTTCAACCCTCAAGCCTCGGCTTGGTGTTGGGGCGCCCGGGCCCTCCGCGGCCCGGGGCCCCCAAGTTCATCGGCGGGCTCGTCGGTTCACTGAGCGCAGTAAAACGCG…	Eukaryota	Fungi	Ascomycota	Pezizomycotina	Sordariomycetes	Sordariomycetidae	NA	Magnaporthales	NA	NA	NA	Pyriculariaceae	Pyricularia	Pyricularia oryzae	Uganda	1.4	32.4
NCBI	MN203069	NA	AGGGATCATTACTGAGTTGAAAAACTCCAACCCCTGTGAACATAACCTCCTGTCGTTGCTTCGGCGGGCACGCCCGCCGGAGGTTCAAAACTCTTATTTTTTTCAGTATCTCTGAGCCTAAAAGACAAATAATCAAAACTTTCAACAACGGATCTCTTGGTTCTGGCATCGATGAAGAACGCAGCGAAATGCGATAAGTAATGTGAATTGCAGAATTCAGTGAATCATCGAATCTTTGAACGCACATTGCGCCCGCCGGTATTCCGGCGGGCATGCCTGTTCGAGCGTCATTTCAACCCTCAAGCCTCGGCTTGGTGTTGGGGCGCCCGGGCCCTCCGCGGCCCGGGGCCCCCAAGTTCATCGGCGGGCTCGTCGGTTCACTGAGCGCAGTAAAACGCG…	Eukaryota	Fungi	Ascomycota	Pezizomycotina	Sordariomycetes	Sordariomycetidae	NA	Magnaporthales	NA	NA	NA	Pyriculariaceae	Pyricularia	Pyricularia oryzae	Uganda	1.4	32.4
NCBI	MN203068	NA	AGGGATCATTACTGAGTTGAAAAACTCCAACCCCTGTGAACATAACCTTCTGTCGTTGCTTCGGCGGGCACGCCCGCCGGAGGTTCAAAACTCTTATTTTTTTCAGTATCTCTGAGCCTAAAAGACAAATAATCAAAACTTTCAACAACGGATCTCTTGGTTCTGGCATCGATGAAGAACGCAGCGAAATGCGATAAGTAATGTGAATTGCAGAATTCAGTGAATCATCGAATCTTTGAACGCACATTGCGCCCGCCGGTATTCCGGCGGGCATGCCTGTTCGAGCGTCATTTCAACCCTCAAGCCTCGGCTTGGTGTTGGGGCGCCCGGGCCCTCCGCGGCCCGGGGCCCCCAAGTTCATCGGCGGGCTCGTCGGTTCACTGAGCGCAGTAAAACGCG…	Eukaryota	Fungi	Ascomycota	Pezizomycotina	Sordariomycetes	Sordariomycetidae	NA	Magnaporthales	NA	NA	NA	Pyriculariaceae	Pyricularia	Pyricularia oryzae	Uganda	1.4	32.4
NCBI	MN203067	NA	AGGGATCATTACTGAGTTGAAAAACTCCAACCCCTGTGAACATAACCTCCTGTCGTTGCTTCGGCGGGCACGCCCGCCGGAGGTTCAAAACTCTTATTTTTTTCAGTATCTCTGAGCCTAAAAGACAAATAATCAAAACTTTCAACAACGGATCTCTTGGTTCTGGCATCGATGAAGAACGCAGCGAAATGCGATAAGTAATGTGAATTGCAGAATTCAGTGAATCATCGAATCTTTGAACGCACATTGCGCCCGCCGGTATTCCGGCGGGCATGCCTGTTCGAGCGTCATTTCAACCCTCAAGCCTCGGCTTGGTGTTGGGGCGCCCGGGCCCTCCGCGGCCCGGGGCCCCCAAGTTCATCGGCGGGCTCGTCGGTTCACTGAGCGCAGTAAAACGCG…	Eukaryota	Fungi	Ascomycota	Pezizomycotina	Sordariomycetes	Sordariomycetidae	NA	Magnaporthales	NA	NA	NA	Pyriculariaceae	Pyricularia	Pyricularia oryzae	Uganda	1.4	32.4
NCBI	MN203066	NA	AGGGATCATTACTGAGTTGAAAAACTCCAACCCCTGTGAACATAACCTCCTGTCGTTGCTTCGGCGGGCACGCCCGCCGGAGGTTCAAAACTCTTATTTTTTTCAGTATCTCTGAGCCTAAAAGACAAATAATCAAAACTTTCAACAACGGATCTCTTGGTTCTGGCATCGATGAAGAACGCAGCGAAATGCGATAAGTAATGTGAATTGCAGAATTCAGTGAATCATCGAATCTTTGAACGCACATTGCGCCCGCCGGTATTCCGGCGGGCATGCCTGTTCGAGCGTCATTTCAACCCTCAAGCCTCGGCTTGGTGTTGGGGCGCCCGGGCCCTCCGCGGCCCGGGGCCCCCAAGTTCATCGGCGGGCTCGTCGGTTCACTGAGCGCAGTAAAACGCG…	Eukaryota	Fungi	Ascomycota	Pezizomycotina	Sordariomycetes	Sordariomycetidae	NA	Magnaporthales	NA	NA	NA	Pyriculariaceae	Pyricularia	Pyricularia oryzae	Uganda	1.4	32.4
NCBI	MN203065	NA	AGGGATCATTACTGAGTTGAAAAACTCCAACCCCTGTGAACATAACCTCCTGTCGTTGCTTCGGCGGGCACGCCCGCCGGAGGTTCAAAACTCTTATTTTTTTCAGTATCTCTGAGCCTAAAAGACAAATAATCAAAACTTTCAACAACGGATCTCTTGGTTCTGGCATCGATGAAGAACGCAGCGAAATGCGATAAGTAATGTGAATTGCAGAATTCAGTGAATCATCGAATCTTTGAACGCACATTGCGCCCGCCGGTATTCCGGCGGGCATGCCTGTTCGAGCGTCATTTCAACCCTCAAGCCTCGGCTTGGTGTTGGGGCGCCCGGGCCCTCCGCGGCCCGGGGCCCCCAAGTTCATCGGCGGGCTCGTCGGTTCACTGAGCGCAGTAAAACGCG…	Eukaryota	Fungi	Ascomycota	Pezizomycotina	Sordariomycetes	Sordariomycetidae	NA	Magnaporthales	NA	NA	NA	Pyriculariaceae	Pyricularia	Pyricularia oryzae	Uganda	1.4	32.4
NCBI	MN203064	NA	AGGGATCATTACTGAGTTGAAAAACTCCAACCCCTGTGAACATAACCTCCTGTCGTTGCTTCGGCGGGCACGCCCGCCGGAGGTTCAAAACTCTTATTTTTTTCAGTATCTCTGAGCCTAAAAGACAAATAATCAAAACTTTCAACAACGGATCTCTTGGTTCTGGCATCGATGAAGAACGCAGCGAAATGCGATAAGTAATGTGAATTGCAGAATTCAGTGAATCATCGAATCTTTGAACGCACATTGCGCCCGCCGGTATTCCGGCGGGCATGCCTGTTCGAGCGTCATTTCAACCCTCAAGCCTCGGCTTGGTGTTGGGGCGCCCGGGCCCTCCGCGGCCCGGGGCCCCCAAGTTCATCGGCGGGCTCGTCGGTTCACTGAGCGCAGTAAAACGCG…	Eukaryota	Fungi	Ascomycota	Pezizomycotina	Sordariomycetes	Sordariomycetidae	NA	Magnaporthales	NA	NA	NA	Pyriculariaceae	Pyricularia	Pyricularia oryzae	Uganda	1.4	32.4
NCBI	MN203063	NA	AGGGATCATTACTGAGTTGAAAAACTCCAACCCCTGTGAACATAACCTCCTGTCGTTGCTTCGGCGGGCACGCCCGCCGGAGGTTCAAAACTCTTATTTTTTTCAGTATCTCTGAGCCTAAAAGACAAATAATCAAAACTTTCAACAACGGATCTCTTGGTTCTGGCATCGATGAAGAACGCAGCGAAATGCGATAAGTAATGTGAATTGCAGAATTCAGTGAATCATCGAATCTTTGAACGCACATTGCGCCCGCCGGTATTCCGGCGGGCATGCCTGTTCGAGCGTCATTTCAACCCTCAAGCCTCGGCTTGGTGTTGGGGCGCCCGGGCCCTCCGCGGCCCGGGGCCCCCAAGTTCATCGGCGGGCTCGTCGGTTCACTGAGCGCAGTAAAACGCG…	Eukaryota	Fungi	Ascomycota	Pezizomycotina	Sordariomycetes	Sordariomycetidae	NA	Magnaporthales	NA	NA	NA	Pyriculariaceae	Pyricularia	Pyricularia oryzae	Uganda	1.4	32.4
NCBI	MN203062	NA	AGGGATCATTACTGAGTTGAAAAACTCCAACCCCTGTGAACATAACCTCCTGTCGTTGCTTCGGCGGGCACGCCCGCCGGAGGTTCAAAACTCTTATTTTTTTCAGTATCTCTGAGCCTAAAAGACAAATAATCAAAACTTTCAACAACGGATCTCTTGGTTCTGGCATCGATGAAGAACGCAGCGAAATGCGATAAGTAATGTGAATTGCAGAATTCAGTGAATCATCGAATCTTTGAACGCACATTGCGCCCGCCGGTATTCCGGCGGGCATGCCTGTTCGAGCGTCATTTCAACCCTCAAGCCTCGGCTTGGTGTTGGGGCGCCCGGGCCCTCCGCGGCCCGGGGCCCCCAAGTTCATCGGCGGGCTCGTCGGTTCACTGAGCGCAGTAAAACGCG…	Eukaryota	Fungi	Ascomycota	Pezizomycotina	Sordariomycetes	Sordariomycetidae	NA	Magnaporthales	NA	NA	NA	Pyriculariaceae	Pyricularia	Pyricularia oryzae	Uganda	1.4	32.4
NCBI	MN203061	NA	AGGGATCATTACTGAGTTGAAAAACTCCAACCCCTGTGAACATAACCTCCTGTCGTTGCTTCGGCGGGCACGCCCGCCGGAGGTTCAAAACTCTTATTTTTTTCAGTATCTCTGAGCCTAAAAGACAAATAATCAAAACTTTCAACAACGGATCTCTTGGTTCTGGCATCGATGAAGAACGCAGCGAAATGCGATAAGTAATGTGAATTGCAGAATTCAGTGAATCATCGAATCTTTGAACGCACATTGCGCCCGCCGGTATTCCGGCGGGCATGCCTGTTCGAGCGTCATTTCAACCCTCAAGCCTCGGCTTGGTGTTGGGGCGCCCGGGCCCTCCGCGGCCCGGGGCCCCCAAGTTCATCGGCGGGCTCGTCGGTTCACTGAGCGCAGTAAAACGCG…	Eukaryota	Fungi	Ascomycota	Pezizomycotina	Sordariomycetes	Sordariomycetidae	NA	Magnaporthales	NA	NA	NA	Pyriculariaceae	Pyricularia	Pyricularia oryzae	Uganda	1.4	32.4
NCBI	MN203060	NA	AGGGATCATTACTGAGTTGAAAAACTCCAACCCCTGTGAACATAACCTCCTGTCGTTGCTTCGGCGGGCACGCCCGCCGGAGGTTCAAAACTCTTATTTTTTTCAGTATCTCTGAGCCTAAAAGACAAATAATCAAAACTTTCAACAACGGATCTCTTGGTTCTGGCATCGATGAAGAACGCAGCGAAATGCGATAAGTAATGTGAATTGCAGAATTCAGTGAATCATCGAATCTTTGAACGCACATTGCGCCCGCCGGTATTCCGGCGGGCATGCCTGTTCGAGCGTCATTTCAACCCTCAAGCCTCGGCTTGGTGTTGGGGCGCCCGGGCCCTCCGCGGCCCGGGGCCCCCAAGTTCATCGGCGGGCTCGTCGGTTCACTGAGCGCAGTAAAACGCG…	Eukaryota	Fungi	Ascomycota	Pezizomycotina	Sordariomycetes	Sordariomycetidae	NA	Magnaporthales	NA	NA	NA	Pyriculariaceae	Pyricularia	Pyricularia oryzae	Uganda	1.4	32.4
NCBI	MN203059	NA	AGGGATCATTACTGAGTTGAAAAACTCCAACCCCTGTGAACATAACCTCCTGTCGTTGCTTCGGCGGGCACGCCCGCCGGAGGTTCAAAACTCTTATTTTTTTCAGTATCTCTGAGCCTAAAAGACAAATAATCAAAACTTTCAACAACGGATCTCTTGGTTCTGGCATCGATGAAGAACGCAGCGAAATGCGATAAGTAATGTGAATTGCAGAATTCAGTGAATCATCGAATCTTTGAACGCACATTGCGCCCGCCGGTATTCCGGCGGGCATGCCTGTTCGAGCGTCATTTCAACCCTCAAGCCTCGGCTTGGTGTTGGGGCGCCCGGGCCCTCCGCGGCCCGGGGCCCCCAAGTTCATCGGCGGGCTCGTCGGTTCACTGAGCGCAGTAAAACGCG…	Eukaryota	Fungi	Ascomycota	Pezizomycotina	Sordariomycetes	Sordariomycetidae	NA	Magnaporthales	NA	NA	NA	Pyriculariaceae	Pyricularia	Pyricularia oryzae	Uganda	1.4	32.4
NCBI	MN203058	NA	AGGGATCATTACTGAGTTGAAAAACTCCAACCCCTGTGAACATAACCTCCTGTCGTTGCTTCGGCGGGCACGCCCGCCGGAGGTTCAAAACTCTTATTTTTTTCAGTATCTCTGAGCCTAAAAGACAAATAATCAAAACTTTCAACAACGGATCTCTTGGTTCTGGCATCGATGAAGAACGCAGCGAAATGCGATAAGTAATGTGAATTGCAGAATTCAGTGAATCATCGAATCTTTGAACGCACATTGCGCCCGCCGGTATTCCGGCGGGCATGCCTGTTCGAGCGTCATTTCAACCCTCAAGCCTCGGCTTGGTGTTGGGGCGCCCGGGCCCTCCGCGGCCCGGGGCCCCCAAGTTCATCGGCGGGCTCGTCGGTTCACTGAGCGCAGTAAAACGCG…	Eukaryota	Fungi	Ascomycota	Pezizomycotina	Sordariomycetes	Sordariomycetidae	NA	Magnaporthales	NA	NA	NA	Pyriculariaceae	Pyricularia	Pyricularia oryzae	Uganda	1.4	32.4
NCBI	MN203057	NA	AGGGATCATTACTGAGTTGAAAAACTCCAACCCCTGTGAACATAACCTCCTGTCGTTGCTTCGGCGGGCACGCCCGCCGGAGGTTCAAAACTCTTATTTTTTTCAGTATCTCTGAGCCTAAAAGACAAATAATCAAAACTTTCAACAACGGATCTCTTGGTTCTGGCATCGATGAAGAACGCAGCGAAATGCGATAAGTAATGTGAATTGCAGAATTCAGTGAATCATCGAATCTTTGAACGCACATTGCGCCCGCCGGTATTCCGGCGGGCATGCCTGTTCGAGCGTCATTTCAACCCTCAAGCCTCGGCTTGGTGTTGGGGCGCCCGGGCCCTCCGCGGCCCGGGGCCCCCAAGTTCATCGGCGGGCTCGTCGGTTCACTGAGCGCAGTAAAACGCG…	Eukaryota	Fungi	Ascomycota	Pezizomycotina	Sordariomycetes	Sordariomycetidae	NA	Magnaporthales	NA	NA	NA	Pyriculariaceae	Pyricularia	Pyricularia oryzae	Uganda	1.4	32.4
NCBI	MN203056	NA	AGGGATCATTACTGAGTTGAAAAACTCCAACCCCTGTGAACATAACCTTCTGTCGTTGCTTCGGCGGGCACGCCCGCCGGAGGTTCAAAACTCTTATTTTTTTCAGTATCTCTGAGCCTAAAAGACAAATAATCAAAACTTTCAACAACGGATCTCTTGGTTCTGGCATCGATGAAGAACGCAGCGAAATGCGATAAGTAATGTGAATTGCAGAATTCAGTGAATCATCGAATCTTTGAACGCACATTGCGCCCGCCGGTATTCCGGCGGGCATGCCTGTTCGAGCGTCATTTCAACCCTCAAGCCTCGGCTTGGTGTTGGGGCGCCCGGGCCCTCCGCGGCCCGGGGCCCCCAAGTTCATCGGCGGGCTCGTCGGTTCACTGAGCGCAGTAAAACGCG…	Eukaryota	Fungi	Ascomycota	Pezizomycotina	Sordariomycetes	Sordariomycetidae	NA	Magnaporthales	NA	NA	NA	Pyriculariaceae	Pyricularia	Pyricularia oryzae	Uganda	1.4	32.4
NCBI	MN203055	NA	AGGGATCATTACTGAGTTGAAAAACTCCAACCCCTGTGAACATAACCTCCTGTCGTTGCTTCGGCGGGCACGCCCGCCGGAGGTTCAAAACTCTTATTTTTTTCAGTATCTCTGAGCCTAAAAGACAAATAATCAAAACTTTCAACAACGGATCTCTTGGTTCTGGCATCGATGAAGAACGCAGCGAAATGCGATAAGTAATGTGAATTGCAGAATTCAGTGAATCATCGAATCTTTGAACGCACATTGCGCCCGCCGGTATTCCGGCGGGCATGCCTGTTCGAGCGTCATTTCAACCCTCAAGCCTCGGCTTGGTGTTGGGGCGCCCGGGCCCTCCGCGGCCCGGGGCCCCCAAGTTCATCGGCGGGCTCGTCGGTTCACTGAGCGCAGTAAAACGCG…	Eukaryota	Fungi	Ascomycota	Pezizomycotina	Sordariomycetes	Sordariomycetidae	NA	Magnaporthales	NA	NA	NA	Pyriculariaceae	Pyricularia	Pyricularia oryzae	Uganda	1.4	32.4
NCBI	MN203054	NA	AGGGATCATTACTGAGTTGAAAAACTCCAACCCCTGTGAACATAACCTCCTGTCGTTGCTTCGGCGGGCACGCCCGCCGGAGGTTCAAAACTCTTATTTTTTTCAGTATCTCTGAGCCTAAAAGACAAATAATCAAAACTTTCAACAACGGATCTCTTGGTTCTGGCATCGATGAAGAACGCAGCGAAATGCGATAAGTAATGTGAATTGCAGAATTCAGTGAATCATCGAATCTTTGAACGCACATTGCGCCCGCCGGTATTCCGGCGGGCATGCCTGTTCGAGCGTCATTTCAACCCTCAAGCCTCGGCTTGGTGTTGGGGCGCCCGGGCCCTCCGCGGCCCGGGGCCCCCAAGTTCATCGGCGGGCTCGTCGGTTCACTGAGCGCAGTAAAACGCG…	Eukaryota	Fungi	Ascomycota	Pezizomycotina	Sordariomycetes	Sordariomycetidae	NA	Magnaporthales	NA	NA	NA	Pyriculariaceae	Pyricularia	Pyricularia oryzae	Uganda	1.4	32.4
NCBI	MN203053	NA	AGGGATCATTACTGAGTTGAAAAACTCCAACCCCTGTGAACATAACCTCCTGTCGTTGCTTCGGCGGGCACGCCCGCCGGAGGTTCAAAACTCTTATTTTTTTCAGTATCTCTGAGCCTAAAAGACAAATAATCAAAACTTTCAACAACGGATCTCTTGGTTCTGGCATCGATGAAGAACGCAGCGAAATGCGATAAGTAATGTGAATTGCAGAATTCAGTGAATCATCGAATCTTTGAACGCACATTGCGCCCGCCGGTATTCCGGCGGGCATGCCTGTTCGAGCGTCATTTCAACCCTCAAGCCTCGGCTTGGTGTTGGGGCGCCCGGGCCCTCCGCGGCCCGGGGCCCCCAAGTTCATCGGCGGGCTCGTCGGTTCACTGAGCGCAGTAAAACGCG…	Eukaryota	Fungi	Ascomycota	Pezizomycotina	Sordariomycetes	Sordariomycetidae	NA	Magnaporthales	NA	NA	NA	Pyriculariaceae	Pyricularia	Pyricularia oryzae	Uganda	1.4	32.4
NCBI	MN203052	NA	AGGGATCATTACTGAGTTGAAAAACTCCAACCCCTGTGAACATAACCTCCTGTCGTTGCTTCGGCGGGCACGCCCGCCGGAGGTTCAAAACTCTTATTTTTTTCAGTATCTCTGAGCCTAAAAGACAAATAATCAAAACTTTCAACAACGGATCTCTTGGTTCTGGCATCGATGAAGAACGCAGCGAAATGCGATAAGTAATGTGAATTGCAGAATTCAGTGAATCATCGAATCTTTGAACGCACATTGCGCCCGCCGGTATTCCGGCGGGCATGCCTGTTCGAGCGTCATTTCAACCCTCAAGCCTCGGCTTGGTGTTGGGGCGCCCGGGCCCTCCGCGGCCCGGGGCCCCCAAGTTCATCGGCGGGCTCGTCGGTTCACTGAGCGCAGTAAAACGCG…	Eukaryota	Fungi	Ascomycota	Pezizomycotina	Sordariomycetes	Sordariomycetidae	NA	Magnaporthales	NA	NA	NA	Pyriculariaceae	Pyricularia	Pyricularia oryzae	Uganda	1.4	32.4
NCBI	MN203051	NA	AGGGATCATTACTGAGTTGAAAAACTCCAACCCCTGTGAACATAACCTCCTGTCGTTGCTTCGGCGGGCACGCCCGCCGGAGGTTCAAAACTCTTATTTTTTTCAGTATCTCTGAGCCTAAAAGACAAATAATCAAAACTTTCAACAACGGATCTCTTGGTTCTGGCATCGATGAAGAACGCAGCGAAATGCGATAAGTAATGTGAATTGCAGAATTCAGTGAATCATCGAATCTTTGAACGCACATTGCGCCCGCCGGTATTCCGGCGGGCATGCCTGTTCGAGCGTCATTTCAACCCTCAAGCCTCGGCTTGGTGTTGGGGCGCCCGGGCCCTCCGCGGCCCGGGGCCCCCAAGTTCATCGGCGGGCTCGTCGGTTCACTGAGCGCAGTAAAACGCG…	Eukaryota	Fungi	Ascomycota	Pezizomycotina	Sordariomycetes	Sordariomycetidae	NA	Magnaporthales	NA	NA	NA	Pyriculariaceae	Pyricularia	Pyricularia oryzae	Uganda	1.4	32.4
NCBI	MN203050	NA	AGGGATCATTACTGAGTTGAAAAACTCCAACCCCTGTGAACATAACCTTCTGTCGTTGCTTCGGCGGGCACGCCCGCCGGAGGTTCAAAACTCTTATTTTTTTCAGTATCTCTGAGCCTAAAAGACAAATAATCAAAACTTTCAACAACGGATCTCTTGGTTCTGGCATCGATGAAGAACGCAGCGAAATGCGATAAGTAATGTGAATTGCAGAATTCAGTGAATCATCGAATCTTTGAACGCACATTGCGCCCGCCGGTATTCCGGCGGGCATGCCTGTTCGAGCGTCATTTCAACCCTCAAGCCTCGGCTTGGTGTTGGGGCGCCCGGGCCCTCCGCGGCCCGGGGCCCCCAAGTTCATCGGCGGGCTCGTCGGTTCACTGAGCGCAGTAAAACGCG…	Eukaryota	Fungi	Ascomycota	Pezizomycotina	Sordariomycetes	Sordariomycetidae	NA	Magnaporthales	NA	NA	NA	Pyriculariaceae	Pyricularia	Pyricularia oryzae	Uganda	1.4	32.4
NCBI	MN203049	NA	AGGGATCATTACTGAGTTGAAAAACTCCAACCCCTGTGAACATAACCTCCTGTCGTTGCTTCGGCGGGCACGCCCGCCGGAGGTTCAAAACTCTTATTTTTTTCAGTATCTCTGAGCCTAAAAGACAAATAATCAAAACTTTCAACAACGGATCTCTTGGTTCTGGCATCGATGAAGAACGCAGCGAAATGCGATAAGTAATGTGAATTGCAGAATTCAGTGAATCATCGAATCTTTGAACGCACATTGCGCCCGCCGGTATTCCGGCGGGCATGCCTGTTCGAGCGTCATTTCAACCCTCAAGCCTCGGCTTGGTGTTGGGGCGCCCGGGCCCTCCGCGGCCCGGGGCCCCCAAGTTCATCGGCGGGCTCGTCGGTTCACTGAGCGCAGTAAAACGCG…	Eukaryota	Fungi	Ascomycota	Pezizomycotina	Sordariomycetes	Sordariomycetidae	NA	Magnaporthales	NA	NA	NA	Pyriculariaceae	Pyricularia	Pyricularia oryzae	Uganda	1.4	32.4
NCBI	MN203048	NA	AGGGATCATTACTGAGTTGAAAAACTCCAACCCCTGTGAACATAACCTCCTGTCGTTGCTTCGGCGGGCACGCCCGCCGGAGGTTCAAAACTCTTATTTTTTTCAGTATCTCTGAGCCTAAAAGACAAATAATCAAAACTTTCAACAACGGATCTCTTGGTTCTGGCATCGATGAAGAACGCAGCGAAATGCGATAAGTAATGTGAATTGCAGAATTCAGTGAATCATCGAATCTTTGAACGCACATTGCGCCCGCCGGTATTCCGGCGGGCATGCCTGTTCGAGCGTCATTTCAACCCTCAAGCCTCGGCTTGGTGTTGGGGCGCCCGGGCCCTCCGCGGCCCGGGGCCCCCAAGTTCATCGGCGGGCTCGTCGGTTCACTGAGCGCAGTAAAACGCG…	Eukaryota	Fungi	Ascomycota	Pezizomycotina	Sordariomycetes	Sordariomycetidae	NA	Magnaporthales	NA	NA	NA	Pyriculariaceae	Pyricularia	Pyricularia oryzae	Uganda	1.4	32.4
NCBI	MN203047	NA	AGGGATCATTACTGAGTTGAAAAACTCCAACCCCTGTGAACATAACCTCCTGTCGTTGCTTCGGCGGGCACGCCCGCCGGAGGTTCAAAACTCTTATTTTTTTCAGTATCTCTGAGCCTAAAAGACAAATAATCAAAACTTTCAACAACGGATCTCTTGGTTCTGGCATCGATGAAGAACGCAGCGAAATGCGATAAGTAATGTGAATTGCAGAATTCAGTGAATCATCGAATCTTTGAACGCACATTGCGCCCGCCGGTATTCCGGCGGGCATGCCTGTTCGAGCGTCATTTCAACCCTCAAGCCTCGGCTTGGTGTTGGGGCGCCCGGGCCCTCCGCGGCCCGGGGCCCCCAAGTTCATCGGCGGGCTCGTCGGTTCACTGAGCGCAGTAAAACGCG…	Eukaryota	Fungi	Ascomycota	Pezizomycotina	Sordariomycetes	Sordariomycetidae	NA	Magnaporthales	NA	NA	NA	Pyriculariaceae	Pyricularia	Pyricularia oryzae	Uganda	1.4	32.4
NCBI	MN203046	NA	AGGGATCATTACTGAGTTGAAAAACTCCAACCCCTGTGAACATAACCTCCTGTCGTTGCTTCGGCGGGCACGCCCGCCGGAGGTTCAAAACTCTTATTTTTTTCAGTATCTCTGAGCCTAAAAGACAAATAATCAAAACTTTCAACAACGGATCTCTTGGTTCTGGCATCGATGAAGAACGCAGCGAAATGCGATAAGTAATGTGAATTGCAGAATTCAGTGAATCATCGAATCTTTGAACGCACATTGCGCCCGCCGGTATTCCGGCGGGCATGCCTGTTCGAGCGTCATTTCAACCCTCAAGCCTCGGCTTGGTGTTGGGGCGCCCGGGCCCTCCGCGGCCCGGGGCCCCCAAGTTCATCGGCGGGCTCGTCGGTTCACTGAGCGCAGTAAAACGCG…	Eukaryota	Fungi	Ascomycota	Pezizomycotina	Sordariomycetes	Sordariomycetidae	NA	Magnaporthales	NA	NA	NA	Pyriculariaceae	Pyricularia	Pyricularia oryzae	Uganda	1.4	32.4
NCBI	MN203045	NA	AGGGATCATTACTGAGTTGAAAAACTCCAACCCCTGTGAACATAACCTCCTGTCGTTGCTTCGGCGGGCACGCCCGCCGGAGGTTCAAAACTCTTATTTTTTTCAGTATCTCTGAGCCTAAAAGACAAATAATCAAAACTTTCAACAACGGATCTCTTGGTTCTGGCATCGATGAAGAACGCAGCGAAATGCGATAAGTAATGTGAATTGCAGAATTCAGTGAATCATCGAATCTTTGAACGCACATTGCGCCCGCCGGTATTCCGGCGGGCATGCCTGTTCGAGCGTCATTTCAACCCTCAAGCCTCGGCTTGGTGTTGGGGCGCCCGGGCCCTCCGCGGCCCGGGGCCCCCAAGTTCATCGGCGGGCTCGTCGGTTCACTGAGCGCAGTAAAACGCG…	Eukaryota	Fungi	Ascomycota	Pezizomycotina	Sordariomycetes	Sordariomycetidae	NA	Magnaporthales	NA	NA	NA	Pyriculariaceae	Pyricularia	Pyricularia oryzae	Uganda	1.4	32.4
NCBI	MN203044	NA	AGGGATCATTACTGAGTTGAAAAACTCCAACCCCTGTGAACATAACCTCCTGTCGTTGCTTCGGCGGGCACGCCCGCCGGAGGTTCAAAACTCTTATTTTTTTCAGTATCTCTGAGCCTAAAAGACAAATAATCAAAACTTTCAACAACGGATCTCTTGGTTCTGGCATCGATGAAGAACGCAGCGAAATGCGATAAGTAATGTGAATTGCAGAATTCAGTGAATCATCGAATCTTTGAACGCACATTGCGCCCGCCGGTATTCCGGCGGGCATGCCTGTTCGAGCGTCATTTCAACCCTCAAGCCTCGGCTTGGTGTTGGGGCGCCCGGGCCCTCCGCGGCCCGGGGCCCCCAAGTTCATCGGCGGGCTCGTCGGTTCACTGAGCGCAGTAAAACGCG…	Eukaryota	Fungi	Ascomycota	Pezizomycotina	Sordariomycetes	Sordariomycetidae	NA	Magnaporthales	NA	NA	NA	Pyriculariaceae	Pyricularia	Pyricularia oryzae	Uganda	1.4	32.4
NCBI	MN203043	NA	AGGGATCATTACTGAGTTGAAAAACTCCAACCCCTGTGAACATAACCTCCTGTCGTTGCTTCGGCGGGCACGCCCGCCGGAGGTTCAAAACTCTTATTTTTTTCAGTATCTCTGAGCCTAAAAGACAAATAATCAAAACTTTCAACAACGGATCTCTTGGTTCTGGCATCGATGAAGAACGCAGCGAAATGCGATAAGTAATGTGAATTGCAGAATTCAGTGAATCATCGAATCTTTGAACGCACATTGCGCCCGCCGGTATTCCGGCGGGCATGCCTGTTCGAGCGTCATTTCAACCCTCAAGCCTCGGCTTGGTGTTGGGGCGCCCGGGCCCTCCGCGGCCCGGGGCCCCCAAGTTCATCGGCGGGCTCGTCGGTTCACTGAGCGCAGTAAAACGCG…	Eukaryota	Fungi	Ascomycota	Pezizomycotina	Sordariomycetes	Sordariomycetidae	NA	Magnaporthales	NA	NA	NA	Pyriculariaceae	Pyricularia	Pyricularia oryzae	Uganda	1.4	32.4
NCBI	MN203042	NA	AGGGATCATTACTGAGTTGAAAAACTCCAACCCCTGTGAACATAACCTCCTGTCGTTGCTTCGGCGGGCACGCCCGCCGGAGGTTCAAAACTCTTATTTTTTTCAGTATCTCTGAGCCTAAAAGACAAATAATCAAAACTTTCAACAACGGATCTCTTGGTTCTGGCATCGATGAAGAACGCAGCGAAATGCGATAAGTAATGTGAATTGCAGAATTCAGTGAATCATCGAATCTTTGAACGCACATTGCGCCCGCCGGTATTCCGGCGGGCATGCCTGTTCGAGCGTCATTTCAACCCTCAAGCCTCGGCTTGGTGTTGGGGCGCCCGGGCCCTCCGCGGCCCGGGGCCCCCAAGTTCATCGGCGGGCTCGTCGGTTCACTGAGCGCAGTAAAACGCG…	Eukaryota	Fungi	Ascomycota	Pezizomycotina	Sordariomycetes	Sordariomycetidae	NA	Magnaporthales	NA	NA	NA	Pyriculariaceae	Pyricularia	Pyricularia oryzae	Uganda	1.4	32.4
NCBI	MN203041	NA	AGGGATCATTACTGAGTTGAAAAACTCCAACCCCTGTGAACATAACCTCCTGTCGTTGCTTCGGCGGGCACGCCCGCCGGAGGTTCAAAACTCTTATTTTTTTCAGTATCTCTGAGCCTAAAAGACAAATAATCAAAACTTTCAACAACGGATCTCTTGGTTCTGGCATCGATGAAGAACGCAGCGAAATGCGATAAGTAATGTGAATTGCAGAATTCAGTGAATCATCGAATCTTTGAACGCACATTGCGCCCGCCGGTATTCCGGCGGGCATGCCTGTTCGAGCGTCATTTCAACCCTCAAGCCTCGGCTTGGTGTTGGGGCGCCCGGGCCCTCCGCGGCCCGGGGCCCCCAAGTTCATCGGCGGGCTCGTCGGTTCACTGAGCGCAGTAAAACGCG…	Eukaryota	Fungi	Ascomycota	Pezizomycotina	Sordariomycetes	Sordariomycetidae	NA	Magnaporthales	NA	NA	NA	Pyriculariaceae	Pyricularia	Pyricularia oryzae	Uganda	1.4	32.4
NCBI	MN203040	NA	AGGGATCATTACTGAGTTGAAAAACTCCAACCCCTGTGAACATAACCTCCTGTCGTTGCTTCGGCGGGCACGCCCGCCGGAGGTTCAAAACTCTTATTTTTTTCAGTATCTCTGAGCCTAAAAGACAAATAATCAAAACTTTCAACAACGGATCTCTTGGTTCTGGCATCGATGAAGAACGCAGCGAAATGCGATAAGTAATGTGAATTGCAGAATTCAGTGAATCATCGAATCTTTGAACGCACATTGCGCCCGCCGGTATTCCGGCGGGCATGCCTGTTCGAGCGTCATTTCAACCCTCAAGCCTCGGCTTGGTGTTGGGGCGCCCGGGCCCTCCGCGGCCCGGGGCCCCCAAGTTCATCGGCGGGCTCGTCGGTTCACTGAGCGCAGTAAAACGCG…	Eukaryota	Fungi	Ascomycota	Pezizomycotina	Sordariomycetes	Sordariomycetidae	NA	Magnaporthales	NA	NA	NA	Pyriculariaceae	Pyricularia	Pyricularia oryzae	Uganda	1.4	32.4
NCBI	MN203039	NA	AGGGATCATTACTGAGTTGAAAAACTCCAACCCCTGTGAACATAACCTCCTGTCGTTGCTTCGGCGGGCACGCCCGCCGGAGGTTCAAAACTCTTATTTTTTTCAGTATCTCTGAGCCTAAAAGACAAATAATCAAAACTTTCAACAACGGATCTCTTGGTTCTGGCATCGATGAAGAACGCAGCGAAATGCGATAAGTAATGTGAATTGCAGAATTCAGTGAATCATCGAATCTTTGAACGCACATTGCGCCCGCCGGTATTCCGGCGGGCATGCCTGTTCGAGCGTCATTTCAACCCTCAAGCCTCGGCTTGGTGTTGGGGCGCCCGGGCCCTCCGCGGCCCGGGGCCCCCAAGTTCATCGGCGGGCTCGTCGGTTCACTGAGCGCAGTAAAACGCG…	Eukaryota	Fungi	Ascomycota	Pezizomycotina	Sordariomycetes	Sordariomycetidae	NA	Magnaporthales	NA	NA	NA	Pyriculariaceae	Pyricularia	Pyricularia oryzae	Uganda	1.4	32.4
NCBI	MN203038	NA	AGGGATCATTACTGAGTTGAAAAACTCCAACCCCTGTGAACATAACCTCCTGTCGTTGCTTCGGCGGGCACGCCCGCCGGAGGTTCAAAACTCTTATTTTTTTCAGTATCTCTGAGCCTAAAAGACAAATAATCAAAACTTTCAACAACGGATCTCTTGGTTCTGGCATCGATGAAGAACGCAGCGAAATGCGATAAGTAATGTGAATTGCAGAATTCAGTGAATCATCGAATCTTTGAACGCACATTGCGCCCGCCGGTATTCCGGCGGGCATGCCTGTTCGAGCGTCATTTCAACCCTCAAGCCTCGGCTTGGTGTTGGGGCGCCCGGGCCCTCCGCGGCCCGGGGCCCCCAAGTTCATCGGCGGGCTCGTCGGTTCACTGAGCGCAGTAAAACGCG…	Eukaryota	Fungi	Ascomycota	Pezizomycotina	Sordariomycetes	Sordariomycetidae	NA	Magnaporthales	NA	NA	NA	Pyriculariaceae	Pyricularia	Pyricularia oryzae	Uganda	1.4	32.4
NCBI	MN202979	NA	AGGGATCATTACTGAGTTGAAAAACTCCAACCCCTGTGAACATAACCTCCTGTCGTTGCTTCGGCGGGCACGCCCGCCGGAGGTTCAAAACTCTTATTTTTTTCAGTATCTCTGAGCCTAAAAGACAAATAATCAAAACTTTCAACAACGGATCTCTTGGTTCTGGCATCGATGAAGAACGCAGCGAAATGCGATAAGTAATGTGAATTGCAGAATTCAGTGAATCATCGAATCTTTGAACGCACATTGCGCCCGCCGGTATTCCGGCGGGCATGCCTGTTCGAGCGTCATTTCAACCCTCAAGCCTCGGCTTGGTGTTGGGGCGCCCGGGCCCTCCGCGGCCCGGGGCCCCCAAGTTCATCGGCGGGCTCGTCGGTTCACTGAGCGCAGTAAAACGCG…	Eukaryota	Fungi	Ascomycota	Pezizomycotina	Sordariomycetes	Sordariomycetidae	NA	Magnaporthales	NA	NA	NA	Pyriculariaceae	Pyricularia	Pyricularia oryzae	Uganda	1.4	32.4
NCBI	MN202978	NA	AGGGATCATTACTGAGTTGAAAAACTCCAACCCCTGTGAACATAACCTCCTGTCGTTGCTTCGGCGGGCACGCCCGCCGGAGGTTCAAAACTCTTATTTTTTTCAGTATCTCTGAGCCTAAAAGACAAATAATCAAAACTTTCAACAACGGATCTCTTGGTTCTGGCATCGATGAAGAACGCAGCGAAATGCGATAAGTAATGTGAATTGCAGAATTCAGTGAATCATCGAATCTTTGAACGCACATTGCGCCCGCCGGTATTCCGGCGGGCATGCCTGTTCGAGCGTCATTTCAACCCTCAAGCCTCGGCTTGGTGTTGGGGCGCCCGGGCCCTCCGCGGCCCGGGGCCCCCAAGTTCATCGGCGGGCTCGTCGGTTCACTGAGCGCAGTAAAACGCG…	Eukaryota	Fungi	Ascomycota	Pezizomycotina	Sordariomycetes	Sordariomycetidae	NA	Magnaporthales	NA	NA	NA	Pyriculariaceae	Pyricularia	Pyricularia oryzae	Uganda	1.4	32.4
NCBI	MN202977	NA	AGGGATCATTACTGAGTTGAAAAACTCCAACCCCTGTGAACATAACCTCCTGTCGTTGCTTCGGCGGGCACGCCCGCCGGAGGTTCAAAACTCTTATTTTTTTCAGTATCTCTGAGCCTAAAAGACAAATAATCAAAACTTTCAACAACGGATCTCTTGGTTCTGGCATCGATGAAGAACGCAGCGAAATGCGATAAGTAATGTGAATTGCAGAATTCAGTGAATCATCGAATCTTTGAACGCACATTGCGCCCGCCGGTATTCCGGCGGGCATGCCTGTTCGAGCGTCATTTCAACCCTCAAGCCTCGGCTTGGTGTTGGGGCGCCCGGGCCCTCCGCGGCCCGGGGCCCCCAAGTTCATCGGCGGGCTCGTCGGTTCACTGAGCGCAGTAAAACGCG…	Eukaryota	Fungi	Ascomycota	Pezizomycotina	Sordariomycetes	Sordariomycetidae	NA	Magnaporthales	NA	NA	NA	Pyriculariaceae	Pyricularia	Pyricularia oryzae	Uganda	1.4	32.4
NCBI	MN202976	NA	AGGGATCATTACTGAGTTGAAAAACTCCAACCCCTGTGAACATAACCTCCTGTCGTTGCTTCGGCGGGCACGCCCGCCGGAGGTTCAAAACTCTTATTTTTTTCAGTATCTCTGAGCCTAAAAGACAAATAATCAAAACTTTCAACAACGGATCTCTTGGTTCTGGCATCGATGAAGAACGCAGCGAAATGCGATAAGTAATGTGAATTGCAGAATTCAGTGAATCATCGAATCTTTGAACGCACATTGCGCCCGCCGGTATTCCGGCGGGCATGCCTGTTCGAGCGTCATTTCAACCCTCAAGCCTCGGCTTGGTGTTGGGGCGCCCGGGCCCTCCGCGGCCCGGGGCCCCCAAGTTCATCGGCGGGCTCGTCGGTTCACTGAGCGCAGTAAAACGCG…	Eukaryota	Fungi	Ascomycota	Pezizomycotina	Sordariomycetes	Sordariomycetidae	NA	Magnaporthales	NA	NA	NA	Pyriculariaceae	Pyricularia	Pyricularia oryzae	Uganda	1.4	32.4
NCBI	MN202975	NA	AGGGATCATTACTGAGTTGAAAAACTCCAACCCCTGTGAACATAACCTCCTGTCGTTGCTTCGGCGGGCACGCCCGCCGGAGGTTCAAAACTCTTATTTTTTTCAGTATCTCTGAGCCTAAAAGACAAATAATCAAAACTTTCAACAACGGATCTCTTGGTTCTGGCATCGATGAAGAACGCAGCGAAATGCGATAAGTAATGTGAATTGCAGAATTCAGTGAATCATCGAATCTTTGAACGCACATTGCGCCCGCCGGTATTCCGGCGGGCATGCCTGTTCGAGCGTCATTTCAACCCTCAAGCCTCGGCTTGGTGTTGGGGCGCCCGGGCCCTCCGCGGCCCGGGGCCCCCAAGTTCATCGGCGGGCTCGTCGGTTCACTGAGCGCAGTAAAACGCG…	Eukaryota	Fungi	Ascomycota	Pezizomycotina	Sordariomycetes	Sordariomycetidae	NA	Magnaporthales	NA	NA	NA	Pyriculariaceae	Pyricularia	Pyricularia oryzae	Uganda	1.4	32.4
NCBI	MN202897	NA	AGGGATCATTACTGAGTTGAAAAACTCCAACCCCTGTGAACATAACCTCCTGTCGTTGCTTCGGCGGGCACGCCCGCCGGAGGTTCAAAACTCTTATTTTTTTCAGTATCTCTGAGCCTAAAAGACAAATAATCAAAACTTTCAACAACGGATCTCTTGGTTCTGGCATCGATGAAGAACGCAGCGAAATGCGATAAGTAATGTGAATTGCAGAATTCAGTGAATCATCGAATCTTTGAACGCACATTGCGCCCGCCGGTATTCCGGCGGGCATGCCTGTTCGAGCGTCATTTCAACCCTCAAGCCTCGGCTTGGTGTTGGGGCGCCCGGGCCCTCCGCGGCCCGGGGCCCCCAAGTTCATCGGCGGGCTCGTCGGTTCACTGAGCGCAGTAAAACGCG…	Eukaryota	Fungi	Ascomycota	Pezizomycotina	Sordariomycetes	Sordariomycetidae	NA	Magnaporthales	NA	NA	NA	Pyriculariaceae	Pyricularia	Pyricularia oryzae	Uganda	1.4	32.4
NCBI	MN202844	NA	AGGGATCATTACTGAGTTGAAAAACTCCAACCCCTGTGAACATAACCTCCTGTCGTTGCTTCGGCGGGCACGCCCGCCGGAGGTTCAAAACTCTTATTTTTTTCAGTATCTCTGAGCCTAAAAGACAAATAATCAAAACTTTCAACAACGGATCTCTTGGTTCTGGCATCGATGAAGAACGCAGCGAAATGCGATAAGTAATGTGAATTGCAGAATTCAGTGAATCATCGAATCTTTGAACGCACATTGCGCCCGCCGGTATTCCGGCGGGCATGCCTGTTCGAGCGTCATTTCAACCCTCAAGCCTCGGCTTGGTGTTGGGGCGCCCGGGCCCTCCGCGGCCCGGGGCCCCCAAGTTCATCGGCGGGCTCGTCGGTTCACTGAGCGCAGTAAAACGCG…	Eukaryota	Fungi	Ascomycota	Pezizomycotina	Sordariomycetes	Sordariomycetidae	NA	Magnaporthales	NA	NA	NA	Pyriculariaceae	Pyricularia	Pyricularia oryzae	Uganda	1.4	32.4
NCBI	MN202832	NA	AGGGATCATTACTGAGTTGAAAAACTCCAACCCCTGTGAACATAACCTCCTGTCGTTGCTTCGGCGGGCACGCCCGCCGGAGGTTCAAAACTCTTATTTTTTTCAGTATCTCTGAGCCTAAAAGACAAATAATCAAAACTTTCAACAACGGATCTCTTGGTTCTGGCATCGATGAAGAACGCAGCGAAATGCGATAAGTAATGTGAATTGCAGAATTCAGTGAATCATCGAATCTTTGAACGCACATTGCGCCCGCCGGTATTCCGGCGGGCATGCCTGTTCGAGCGTCATTTCAACCCTCAAGCCTCGGCTTGGTGTTGGGGCGCCCGGGCCCTCCGCGGCCCGGGGCCCCCAAGTTCATCGGCGGGCTCGTCGGTTCACTGAGCGCAGTAAAACGCG…	Eukaryota	Fungi	Ascomycota	Pezizomycotina	Sordariomycetes	Sordariomycetidae	NA	Magnaporthales	NA	NA	NA	Pyriculariaceae	Pyricularia	Pyricularia oryzae	Uganda	1.4	32.4
NCBI	MN202831	NA	AGGGATCATTACTGAGTTGAAAAACTCCAACCCCTGTGAACATAACCTCCTGTCGTTGCTTCGGCGGGCACGCCCGCCGGAGGTTCAAAACTCTTATTTTTTTCAGTATCTCTGAGCCTAAAAGACAAATAATCAAAACTTTCAACAACGGATCTCTTGGTTCTGGCATCGATGAAGAACGCAGCGAAATGCGATAAGTAATGTGAATTGCAGAATTCAGTGAATCATCGAATCTTTGAACGCACATTGCGCCCGCCGGTATTCCGGCGGGCATGCCTGTTCGAGCGTCATTTCAACCCTCAAGCCTCGGCTTGGTGTTGGGGCGCCCGGGCCCTCCGCGGCCCGGGGCCCCCAAGTTCATCGGCGGGCTCGTCGGTTCACTGAGCGCAGTAAAACGCG…	Eukaryota	Fungi	Ascomycota	Pezizomycotina	Sordariomycetes	Sordariomycetidae	NA	Magnaporthales	NA	NA	NA	Pyriculariaceae	Pyricularia	Pyricularia oryzae	Uganda	1.4	32.4
NCBI	MN202829	NA	AGGGATCATTACTGAGTTGAAAAACTCCAACCCCTGTGAACATAACCTCCTGTCGTTGCTTCGGCGGGCACGCCCGCCGGAGGTTCAAAACTCTTATTTTTTTCAGTATCTCTGAGCCTAAAAGACAAATAATCAAAACTTTCAACAACGGATCTCTTGGTTCTGGCATCGATGAAGAACGCAGCGAAATGCGATAAGTAATGTGAATTGCAGAATTCAGTGAATCATCGAATCTTTGAACGCACATTGCGCCCGCCGGTATTCCGGCGGGCATGCCTGTTCGAGCGTCATTTCAACCCTCAAGCCTCGGCTTGGTGTTGGGGCGCCCGGGCCCTCCGCGGCCCGGGGCCCCCAAGTTCATCGGCGGGCTCGTCGGTTCACTGAGCGCAGTAAAACGCG…	Eukaryota	Fungi	Ascomycota	Pezizomycotina	Sordariomycetes	Sordariomycetidae	NA	Magnaporthales	NA	NA	NA	Pyriculariaceae	Pyricularia	Pyricularia oryzae	Uganda	1.4	32.4
NCBI	MN202828	NA	AGGGATCATTACTGAGTTGAAAAACTCCAACCCCTGTGAACATAACCTCCTGTCGTTGCTTCGGCGGGCACGCCCGCCGGAGGTTCAAAACTCTTATTTTTTTCAGTATCTCTGAGCCTAAAAGACAAATAATCAAAACTTTCAACAACGGATCTCTTGGTTCTGGCATCGATGAAGAACGCAGCGAAATGCGATAAGTAATGTGAATTGCAGAATTCAGTGAATCATCGAATCTTTGAACGCACATTGCGCCCGCCGGTATTCCGGCGGGCATGCCTGTTCGAGCGTCATTTCAACCCTCAAGCCTCGGCTTGGTGTTGGGGCGCCCGGGCCCTCCGCGGCCCGGGGCCCCCAAGTTCATCGGCGGGCTCGTCGGTTCACTGAGCGCAGTAAAACGCG…	Eukaryota	Fungi	Ascomycota	Pezizomycotina	Sordariomycetes	Sordariomycetidae	NA	Magnaporthales	NA	NA	NA	Pyriculariaceae	Pyricularia	Pyricularia oryzae	Uganda	1.4	32.4
NCBI	MN202827	NA	AGGGATCATTACTGAGTTGAAAAACTCCAACCCCTGTGAACATAACCTCCTGTCGTTGCTTCGGCGGGCACGCCCGCCGGAGGTTCAAAACTCTTATTTTTTTCAGTATCTCTGAGCCTAAAAGACAAATAATCAAAACTTTCAACAACGGATCTCTTGGTTCTGGCATCGATGAAGAACGCAGCGAAATGCGATAAGTAATGTGAATTGCAGAATTCAGTGAATCATCGAATCTTTGAACGCACATTGCGCCCGCCGGTATTCCGGCGGGCATGCCTGTTCGAGCGTCATTTCAACCCTCAAGCCTCGGCTTGGTGTTGGGGCGCCCGGGCCCTCCGCGGCCCGGGGCCCCCAAGTTCATCGGCGGGCTCGTCGGTTCACTGAGCGCAGTAAAACGCG…	Eukaryota	Fungi	Ascomycota	Pezizomycotina	Sordariomycetes	Sordariomycetidae	NA	Magnaporthales	NA	NA	NA	Pyriculariaceae	Pyricularia	Pyricularia oryzae	Uganda	1.4	32.4
NCBI	MN202826	NA	AGGGATCATTACTGAGTTGAAAAACTCCAACCCCTGTGAACATAACCTCCTGTCGTTGCTTCGGCGGGCACGCCCGCCGGAGGTTCAAAACTCTTATTTTTTTCAGTATCTCTGAGCCTAAAAGACAAATAATCAAAACTTTCAACAACGGATCTCTTGGTTCTGGCATCGATGAAGAACGCAGCGAAATGCGATAAGTAATGTGAATTGCAGAATTCAGTGAATCATCGAATCTTTGAACGCACATTGCGCCCGCCGGTATTCCGGCGGGCATGCCTGTTCGAGCGTCATTTCAACCCTCAAGCCTCGGCTTGGTGTTGGGGCGCCCGGGCCCTCCGCGGCCCGGGGCCCCCAAGTTCATCGGCGGGCTCGTCGGTTCACTGAGCGCAGTAAAACGCG…	Eukaryota	Fungi	Ascomycota	Pezizomycotina	Sordariomycetes	Sordariomycetidae	NA	Magnaporthales	NA	NA	NA	Pyriculariaceae	Pyricularia	Pyricularia oryzae	Uganda	1.4	32.4
NCBI	MN202825	NA	AGGGATCATTACTGAGTTGAAAAACTCCAACCCCTGTGAACATAACCTCCTGTCGTTGCTTCGGCGGGCACGCCCGCCGGAGGTTCAAAACTCTTATTTTTTTCAGTATCTCTGAGCCTAAAAGACAAATAATCAAAACTTTCAACAACGGATCTCTTGGTTCTGGCATCGATGAAGAACGCAGCGAAATGCGATAAGTAATGTGAATTGCAGAATTCAGTGAATCATCGAATCTTTGAACGCACATTGCGCCCGCCGGTATTCCGGCGGGCATGCCTGTTCGAGCGTCATTTCAACCCTCAAGCCTCGGCTTGGTGTTGGGGCGCCCGGGCCCTCCGCGGCCCGGGGCCCCCAAGTTCATCGGCGGGCTCGTCGGTTCACTGAGCGCAGTAAAACGCG…	Eukaryota	Fungi	Ascomycota	Pezizomycotina	Sordariomycetes	Sordariomycetidae	NA	Magnaporthales	NA	NA	NA	Pyriculariaceae	Pyricularia	Pyricularia oryzae	Uganda	1.4	32.4
NCBI	MN202824	NA	AGGGATCATTACTGAGTTGAAAAACTCCAACCCCTGTGAACATAACCTCCTGTCGTTGCTTCGGCGGGCACGCCCGCCGGAGGTTCAAAACTCTTATTTTTTTCAGTATCTCTGAGCCTAAAAGACAAATAATCAAAACTTTCAACAACGGATCTCTTGGTTCTGGCATCGATGAAGAACGCAGCGAAATGCGATAAGTAATGTGAATTGCAGAATTCAGTGAATCATCGAATCTTTGAACGCACATTGCGCCCGCCGGTATTCCGGCGGGCATGCCTGTTCGAGCGTCATTTCAACCCTCAAGCCTCGGCTTGGTGTTGGGGCGCCCGGGCCCTCCGCGGCCCGGGGCCCCCAAGTTCATCGGCGGGCTCGTCGGTTCACTGAGCGCAGTAAAACGCG…	Eukaryota	Fungi	Ascomycota	Pezizomycotina	Sordariomycetes	Sordariomycetidae	NA	Magnaporthales	NA	NA	NA	Pyriculariaceae	Pyricularia	Pyricularia oryzae	Uganda	1.4	32.4
NCBI	MN202823	NA	AGGGATCATTACTGAGTTGAAAAACTCCAACCCCTGTGAACATAACCTCCTGTCGTTGCTTCGGCGGGCACGCCCGCCGGAGGTTCAAAACTCTTATTTTTTTCAGTATCTCTGAGCCTAAAAGACAAATAATCAAAACTTTCAACAACGGATCTCTTGGTTCTGGCATCGATGAAGAACGCAGCGAAATGCGATAAGTAATGTGAATTGCAGAATTCAGTGAATCATCGAATCTTTGAACGCACATTGCGCCCGCCGGTATTCCGGCGGGCATGCCTGTTCGAGCGTCATTTCAACCCTCAAGCCTCGGCTTGGTGTTGGGGCGCCCGGGCCCTCCGCGGCCCGGGGCCCCCAAGTTCATCGGCGGGCTCGTCGGTACACTGAGCGCAGTAAAACGCG…	Eukaryota	Fungi	Ascomycota	Pezizomycotina	Sordariomycetes	Sordariomycetidae	NA	Magnaporthales	NA	NA	NA	Pyriculariaceae	Pyricularia	Pyricularia oryzae	Uganda	1.4	32.4
NCBI	MN202822	NA	AGGGATCATTACTGAGTTGAAAAACTCCAACCCCTGTGAACATAACCTCCTGTCGTTGCTTCGGCGGGCACGCCCGCCGGAGGTTCAAAACTCTTATTTTTTTCAGTATCTCTGAGCCTAAAAGACAAATAATCAAAACTTTCAACAACGGATCTCTTGGTTCTGGCATCGATGAAGAACGCAGCGAAATGCGATAAGTAATGTGAATTGCAGAATTCAGTGAATCATCGAATCTTTGAACGCACATTGCGCCCGCCGGTATTCCGGCGGGCATGCCTGTTCGAGCGTCATTTCAACCCTCAAGCCTCGGCTTGGTGTTGGGGCGCCCGGGCCCTCCGCGGCCCGGGGCCCCCAAGTTCATCGGCGGGCTCGTCGGTTCACTGAGCGCAGTAAAACGCG…	Eukaryota	Fungi	Ascomycota	Pezizomycotina	Sordariomycetes	Sordariomycetidae	NA	Magnaporthales	NA	NA	NA	Pyriculariaceae	Pyricularia	Pyricularia oryzae	Uganda	1.4	32.4
NCBI	MN202820	NA	AGGGATCATTACTGAGTTGAAAAACTCCAACCCCTGTGAACATAACCTCCTGTCGTTGCTTCGGCGGGCACGCCCGCCGGAGGTTCAAAACTCTTATTTTTTTCAGTATCTCTGAGCCTAAAAGACAAATAATCAAAACTTTCAACAACGGATCTCTTGGTTCTGGCATCGATGAAGAACGCAGCGAAATGCGATAAGTAATGTGAATTGCAGAATTCAGTGAATCATCGAATCTTTGAACGCACATTGCGCCCGCCGGTATTCCGGCGGGCATGCCTGTTCGAGCGTCATTTCAACCCTCAAGCCTCGGCTTGGTGTTGGGGCGCCCGGGCCCTCCGCGGCCCGGGGCCCCCAAGTTCATCGGCGGGCTCGTCGGTTCACTGAGCGCAGTAAAACGCG…	Eukaryota	Fungi	Ascomycota	Pezizomycotina	Sordariomycetes	Sordariomycetidae	NA	Magnaporthales	NA	NA	NA	Pyriculariaceae	Pyricularia	Pyricularia oryzae	Uganda	1.4	32.4
NCBI	MN202819	NA	AGGGATCATTACTGAGTTGAAAAACTCCAACCCCTGTGAACATAACCTCCTGTCGTTGCTTCGGCGGGCACGCCCGCCGGAGGTTCAAAACTCTTATTTTTTTCAGTATCTCTGAGCCTAAAAGACAAATAATCAAAACTTTCAACAACGGATCTCTTGGTTCTGGCATCGATGAAGAACGCAGCGAAATGCGATAAGTAATGTGAATTGCAGAATTCAGTGAATCATCGAATCTTTGAACGCACATTGCGCCCGCCGGTATTCCGGCGGGCATGCCTGTTCGAGCGTCATTTCAACCCTCAAGCCTCGGCTTGGTGTTGGGGCGCCCGGGCCCTCCGCGGCCCGGGGCCCCCAAGTTCATCGGCGGGCTCGTCGGTTCACTGAGCGCAGTAAAACGCG…	Eukaryota	Fungi	Ascomycota	Pezizomycotina	Sordariomycetes	Sordariomycetidae	NA	Magnaporthales	NA	NA	NA	Pyriculariaceae	Pyricularia	Pyricularia oryzae	Uganda	1.4	32.4
NCBI	MN202818	NA	AGGGATCATTACTGAGTTGAAAAACTCCAACCCCTGTGAACATAACCTCCTGTCGTTGCTTCGGCGGGCACGCCCGCCGGAGGTTCAAAACTCTTATTTTTTTCAGTATCTCTGAGCCTAAAAGACAAATAATCAAAACTTTCAACAACGGATCTCTTGGTTCTGGCATCGATGAAGAACGCAGCGAAATGCGATAAGTAATGTGAATTGCAGAATTCAGTGAATCATCGAATCTTTGAACGCACATTGCGCCCGCCGGTATTCCGGCGGGCATGCCTGTTCGAGCGTCATTTCAACCCTCAAGCCTCGGCTTGGTGTTGGGGCGCCCGGGCCCTCCGCGGCCCGGGGCCCCCAAGTTCATCGGCGGGCTCGTCGGTTCACTGAGCGCAGTAAAACGCG…	Eukaryota	Fungi	Ascomycota	Pezizomycotina	Sordariomycetes	Sordariomycetidae	NA	Magnaporthales	NA	NA	NA	Pyriculariaceae	Pyricularia	Pyricularia oryzae	Uganda	1.4	32.4
NCBI	MN202817	NA	AGGGATCATTACTGAGTTGAAAAACTCCAACCCCTGTGAACATAACCTCCTGTCGTTGCTTCGGCGGGCACGCCCGCCGGAGGTTCAAAACTCTTATTTTTTTCAGTATCTCTGAGCCTAAAAGACAAATAATCAAAACTTTCAACAACGGATCTCTTGGTTCTGGCATCGATGAAGAACGCAGCGAAATGCGATAAGTAATGTGAATTGCAGAATTCAGTGAATCATCGAATCTTTGAACGCACATTGCGCCCGCCGGTATTCCGGCGGGCATGCCTGTTCGAGCGTCATTTCAACCCTCAAGCCTCGGCTTGGTGTTGGGGCGCCCGGGCCCTCCGCGGCCCGGGGCCCCCAAGTTCATCGGCGGGCTCGTCGGTTCACTGAGCGCAGTAAAACGCG…	Eukaryota	Fungi	Ascomycota	Pezizomycotina	Sordariomycetes	Sordariomycetidae	NA	Magnaporthales	NA	NA	NA	Pyriculariaceae	Pyricularia	Pyricularia oryzae	Uganda	1.4	32.4
NCBI	MN202816	NA	AGGGATCATTACTGAGTTGAAAAACTCCAACCCCTGTGAACATAACCTCCTGTCGTTGCTTCGGCGGGCACGCCCGCCGGAGGTTCAAAACTCTTATTTTTTTCAGTATCTCTGAGCCTAAAAGACAAATAATCAAAACTTTCAACAACGGATCTCTTGGTTCTGGCATCGATGAAGAACGCAGCGAAATGCGATAAGTAATGTGAATTGCAGAATTCAGTGAATCATCGAATCTTTGAACGCACATTGCGCCCGCCGGTATTCCGGCGGGCATGCCTGTTCGAGCGTCATTTCAACCCTCAAGCCTCGGCTTGGTGTTGGGGCGCCCGGGCCCTCCGCGGCCCGGGGCCCCCAAGTTCATCGGCGGGCTCGTCGGTTCACTGAGCGCAGTAAAACGCG…	Eukaryota	Fungi	Ascomycota	Pezizomycotina	Sordariomycetes	Sordariomycetidae	NA	Magnaporthales	NA	NA	NA	Pyriculariaceae	Pyricularia	Pyricularia oryzae	Uganda	1.4	32.4
NCBI	MN202814	NA	AGGGATCATTACTGAGTTGAAAAACTCCAACCCCTGTGAACATAACCTCCTGTCGTTGCTTCGGCGGGCACGCCCGCCGGAGGTTCAAAACTCTTATTTTTTTCAGTATCTCTGAGCCTAAAAGACAAATAATCAAAACTTTCAACAACGGATCTCTTGGTTCTGGCATCGATGAAGAACGCAGCGAAATGCGATAAGTAATGTGAATTGCAGAATTCAGTGAATCATCGAATCTTTGAACGCACATTGCGCCCGCCGGTATTCCGGCGGGCATGCCTGTTCGAGCGTCATTTCAACCCTCAAGCCTCGGCTTGGTGTTGGGGCGCCCGGGCCCTCCGCGGCCCGGGGCCCCCAAGTTCATCGGCGGGCTCGTCGGTTCACTGAGCGCAGTAAAACGCG…	Eukaryota	Fungi	Ascomycota	Pezizomycotina	Sordariomycetes	Sordariomycetidae	NA	Magnaporthales	NA	NA	NA	Pyriculariaceae	Pyricularia	Pyricularia oryzae	Uganda	1.4	32.4
NCBI	MN202813	NA	AGGGATCATTACTGAGTTGAAAAACTCCAACCCCTGTGAACATAACCTCCTGTCGTTGCTTCGGCGGGCACGCCCGCCGGAGGTTCAAAACTCTTATTTTTTTCAGTATCTCTGAGCCTAAAAGACAAATAATCAAAACTTTCAACAACGGATCTCTTGGTTCTGGCATCGATGAAGAACGCAGCGAAATGCGATAAGTAATGTGAATTGCAGAATTCAGTGAATCATCGAATCTTTGAACGCACATTGCGCCCGCCGGTATTCCGGCGGGCATGCCTGTTCGAGCGTCATTTCAACCCTCAAGCCTCGGCTTGGTGTTGGGGCGCCCGGGCCCTCCGCGGCCCGGGGCCCCCAAGTTCATCGGCGGGCTCGTCGGTTCACTGAGCGCAGTAAAACGCG…	Eukaryota	Fungi	Ascomycota	Pezizomycotina	Sordariomycetes	Sordariomycetidae	NA	Magnaporthales	NA	NA	NA	Pyriculariaceae	Pyricularia	Pyricularia oryzae	Uganda	1.4	32.4
NCBI	MN202812	NA	AGGGATCATTACTGAGTTGAAAAACTCCAACCCCTGTGAACATAACCTCCTGTCGTTGCTTCGGCGGGCACGCCCGCCGGAGGTTCAAAACTCTTATTTTTTTCAGTATCTCTGAGCCTAAAAGACAAATAATCAAAACTTTCAACAACGGATCTCTTGGTTCTGGCATCGATGAAGAACGCAGCGAAATGCGATAAGTAATGTGAATTGCAGAATTCAGTGAATCATCGAATCTTTGAACGCACATTGCGCCCGCCGGTATTCCGGCGGGCATGCCTGTTCGAGCGTCATTTCAACCCTCAAGCCTCGGCTTGGTGTTGGGGCGCCCGGGCCCTCCGCGGCCCGGGGCCCCCAAGTTCATCGGCGGGCTCGTCGGTTCACTGAGCGCAGTAAAACGCG…	Eukaryota	Fungi	Ascomycota	Pezizomycotina	Sordariomycetes	Sordariomycetidae	NA	Magnaporthales	NA	NA	NA	Pyriculariaceae	Pyricularia	Pyricularia oryzae	Uganda	1.4	32.4
NCBI	MN202811	NA	AGGGATCATTACTGAGTTGAAAAACTCCAACCCCTGTGAACATAACCTCCTGTCGTTGCTTCGGCGGGCACGCCCGCCGGAGGTTCAAAACTCTTATTTTTTTCAGTATCTCTGAGCCTAAAAGACAAATAATCAAAACTTTCAACAACGGATCTCTTGGTTCTGGCATCGATGAAGAACGCAGCGAAATGCGATAAGTAATGTGAATTGCAGAATTCAGTGAATCATCGAATCTTTGAACGCACATTGCGCCCGCCGGTATTCCGGCGGGCATGCCTGTTCGAGCGTCATTTCAACCCTCAAGCCTCGGCTTGGTGTTGGGGCGCCCGGGCCCTCCGCGGCCCGGGGCCCCCAAGTTCATCGGCGGGCTCGTCGGTTCACTGAGCGCAGTAAAACGCG…	Eukaryota	Fungi	Ascomycota	Pezizomycotina	Sordariomycetes	Sordariomycetidae	NA	Magnaporthales	NA	NA	NA	Pyriculariaceae	Pyricularia	Pyricularia oryzae	Uganda	1.4	32.4
NCBI	MN202810	NA	AGGGATCATTACTGAGTTGAAAAACTCCAACCCCTGTGAACATAACCTCCTGTCGTTGCTTCGGCGGGCACGCCCGCCGGAGGTTCAAAACTCTTATTTTTTTCAGTATCTCTGAGCCTAAAAGACAAATAATCAAAACTTTCAACAACGGATCTCTTGGTTCTGGCATCGATGAAGAACGCAGCGAAATGCGATAAGTAATGTGAATTGCAGAATTCAGTGAATCATCGAATCTTTGAACGCACATTGCGCCCGCCGGTATTCCGGCGGGCATGCCTGTTCGAGCGTCATTTCAACCCTCAAGCCTCGGCTTGGTGTTGGGGCGCCCGGGCCCTCCGCGGCCCGGGGCCCCCAAGTTCATCGGCGGGCTCGTCGGTTCACTGAGCGCAGTAAAACGCG…	Eukaryota	Fungi	Ascomycota	Pezizomycotina	Sordariomycetes	Sordariomycetidae	NA	Magnaporthales	NA	NA	NA	Pyriculariaceae	Pyricularia	Pyricularia oryzae	Uganda	1.4	32.4
NCBI	MN202809	NA	AGGGATCATTACTGAGTTGAAAAACTCCAACCCCTGTGAACATAACCTCCTGTCGTTGCTTCGGCGGGCACGCCCGCCGGAGGTTCAAAACTCTTATTTTTTTCAGTATCTCTGAGCCTAAAAGACAAATAATCAAAACTTTCAACAACGGATCTCTTGGTTCTGGCATCGATGAAGAACGCAGCGAAATGCGATAAGTAATGTGAATTGCAGAATTCAGTGAATCATCGAATCTTTGAACGCACATTGCGCCCGCCGGTATTCCGGCGGGCATGCCTGTTCGAGCGTCATTTCAACCCTCAAGCCTCGGCTTGGTGTTGGGGCGCCCGGGCCCTCCGCGGCCCGGGGCCCCCAAGTTCATCGGCGGGCTCGTCGGTTCACTGAGCGCAGTAAAACGCG…	Eukaryota	Fungi	Ascomycota	Pezizomycotina	Sordariomycetes	Sordariomycetidae	NA	Magnaporthales	NA	NA	NA	Pyriculariaceae	Pyricularia	Pyricularia oryzae	Uganda	1.4	32.4
NCBI	MN202808	NA	AGGGATCATTACTGAGTTGAAAAACTCCAACCCCTGTGAACATAACCTCCTGTCGTTGCTTCGGCGGGCACGCCCGCCGGAGGTTCAAAACTCTTATTTTTTTCAGTATCTCTGAGCCTAAAAGACAAATAATCAAAACTTTCAACAACGGATCTCTTGGTTCTGGCATCGATGAAGAACGCAGCGAAATGCGATAAGTAATGTGAATTGCAGAATTCAGTGAATCATCGAATCTTTGAACGCACATTGCGCCCGCCGGTATTCCGGCGGGCATGCCTGTTCGAGCGTCATTTCAACCCTCAAGCCTCGGCTTGGTGTTGGGGCGCCCGGGCCCTCCGCGGCCCGGGGCCCCCAAGTTCATCGGCGGGCTCGTCGGTTCACTGAGCGCAGTAAAACGCG…	Eukaryota	Fungi	Ascomycota	Pezizomycotina	Sordariomycetes	Sordariomycetidae	NA	Magnaporthales	NA	NA	NA	Pyriculariaceae	Pyricularia	Pyricularia oryzae	Uganda	1.4	32.4
NCBI	MN202807	NA	AGGGATCATTACTGAGTTGAAAAACTCCAACCCCTGTGAACATAACCTCCTGTCGTTGCTTCGGCGGGCACGCCCGCCGGAGGTTCAAAACTCTTATTTTTTTCAGTATCTCTGAGCCTAAAAGACAAATAATCAAAACTTTCAACAACGGATCTCTTGGTTCTGGCATCGATGAAGAACGCAGCGAAATGCGATAAGTAATGTGAATTGCAGAATTCAGTGAATCATCGAATCTTTGAACGCACATTGCGCCCGCCGGTATTCCGGCGGGCATGCCTGTTCGAGCGTCATTTCAACCCTCAAGCCTCGGCTTGGTGTTGGGGCGCCCGGGCCCTCCGCGGCCCGGGGCCCCCAAGTTCATCGGCGGGCTCGTCGGTTCACTGAGCGCAGTAAAACGCG…	Eukaryota	Fungi	Ascomycota	Pezizomycotina	Sordariomycetes	Sordariomycetidae	NA	Magnaporthales	NA	NA	NA	Pyriculariaceae	Pyricularia	Pyricularia oryzae	Uganda	1.4	32.4
NCBI	MN202806	NA	AGGGATCATTACTGAGTTGAAAAACTCCAACCCCTGTGAACATAACCTCCTGTCGTTGCTTCGGCGGGCACGCCCGCCGGAGGTTCAAAACTCTTATTTTTTTCAGTATCTCTGAGCCTAAAAGACAAATAATCAAAACTTTCAACAACGGATCTCTTGGTTCTGGCATCGATGAAGAACGCAGCGAAATGCGATAAGTAATGTGAATTGCAGAATTCAGTGAATCATCGAATCTTTGAACGCACATTGCGCCCGCCGGTATTCCGGCGGGCATGCCTGTTCGAGCGTCATTTCAACCCTCAAGCCTCGGCTTGGTGTTGGGGCGCCCGGGCCCTCCGCGGCCCGGGGCCCCCAAGTTCATCGGCGGGCTCGTCGGTTCACTGAGCGCAGTAAAACGCG…	Eukaryota	Fungi	Ascomycota	Pezizomycotina	Sordariomycetes	Sordariomycetidae	NA	Magnaporthales	NA	NA	NA	Pyriculariaceae	Pyricularia	Pyricularia oryzae	Uganda	1.4	32.4
NCBI	MN202805	NA	AGGGATCATTACTGAGTTGAAAAACTCCAACCCCTGTGAACATAACCTCCTGTCGTTGCTTCGGCGGGCACGCCCGCCGGAGGTTCAAAACTCTTATTTTTTTCAGTATCTCTGAGCCTAAAAGACAAATAATCAAAACTTTCAACAACGGATCTCTTGGTTCTGGCATCGATGAAGAACGCAGCGAAATGCGATAAGTAATGTGAATTGCAGAATTCAGTGAATCATCGAATCTTTGAACGCACATTGCGCCCGCCGGTATTCCGGCGGGCATGCCTGTTCGAGCGTCATTTCAACCCTCAAGCCTCGGCTTGGTGTTGGGGCGCCCGGGCCCTCCGCGGCCCGGGGCCCCCAAGTTCATCGGCGGGCTCGTCGGTTCACTGAGCGCAGTAAAACGCG…	Eukaryota	Fungi	Ascomycota	Pezizomycotina	Sordariomycetes	Sordariomycetidae	NA	Magnaporthales	NA	NA	NA	Pyriculariaceae	Pyricularia	Pyricularia oryzae	Uganda	1.4	32.4
NCBI	MN202804	NA	AGGGATCATTACTGAGTTGAAAAACTCCAACCCCTGTGAACATAACCTCCTGTCGTTGCTTCGGCGGGCACGCCCGCCGGAGGTTCAAAACTCTTATTTTTTTCAGTATCTCTGAGCCTAAAAGACAAATAATCAAAACTTTCAACAACGGATCTCTTGGTTCTGGCATCGATGAAGAACGCAGCGAAATGCGATAAGTAATGTGAATTGCAGAATTCAGTGAATCATCGAATCTTTGAACGCACATTGCGCCCGCCGGTATTCCGGCGGGCATGCCTGTTCGAGCGTCATTTCAACCCTCAAGCCTCGGCTTGGTGTTGGGGCGCCCGGGCCCTCCGCGGCCCGGGGCCCCCAAGTTCATCGGCGGGCTCGTCGGTTCACTGAGCGCAGTAAAACGCG…	Eukaryota	Fungi	Ascomycota	Pezizomycotina	Sordariomycetes	Sordariomycetidae	NA	Magnaporthales	NA	NA	NA	Pyriculariaceae	Pyricularia	Pyricularia oryzae	Uganda	1.4	32.4
NCBI	MN202803	NA	AGGGATCATTACTGAGTTGAAAAACTCCAACCCCTGTGAACATAACCTCCTGTCGTTGCTTCGGCGGGCACGCCCGCCGGAGGTTCAAAACTCTTATTTTTTTCAGTATCTCTGAGCCTAAAAGACAAATAATCAAAACTTTCAACAACGGATCTCTTGGTTCTGGCATCGATGAAGAACGCAGCGAAATGCGATAAGTAATGTGAATTGCAGAATTCAGTGAATCATCGAATCTTTGAACGCACATTGCGCCCGCCGGTATTCCGGCGGGCATGCCTGTTCGAGCGTCATTTCAACCCTCAAGCCTCGGCTTGGTGTTGGGGCGCCCGGGCCCTCCGCGGCCCGGGGCCCCCAAGTTCATCGGCGGGCTCGTCGGTTCACTGAGCGCAGTAAAACGCG…	Eukaryota	Fungi	Ascomycota	Pezizomycotina	Sordariomycetes	Sordariomycetidae	NA	Magnaporthales	NA	NA	NA	Pyriculariaceae	Pyricularia	Pyricularia oryzae	Uganda	1.4	32.4
NCBI	MN202802	NA	AGGGATCATTACTGAGTTGAAAAACTCCAACCCCTGTGAACATAACCTCCTGTCGTTGCTTCGGCGGGCACGCCCGCCGGAGGTTCAAAACTCTTATTTTTTTCAGTATCTCTGAGCCTAAAAGACAAATAATCAAAACTTTCAACAACGGATCTCTTGGTTCTGGCATCGATGAAGAACGCAGCGAAATGCGATAAGTAATGTGAATTGCAGAATTCAGTGAATCATCGAATCTTTGAACGCACATTGCGCCCGCCGGTATTCCGGCGGGCATGCCTGTTCGAGCGTCATTTCAACCCTCAAGCCTCGGCTTGGTGTTGGGGCGCCCGGGCCCTCCGCGGCCCGGGGCCCCCAAGTTCATCGGCGGGCTCGTCGGTTCACTGAGCGCAGTAAAACGCG…	Eukaryota	Fungi	Ascomycota	Pezizomycotina	Sordariomycetes	Sordariomycetidae	NA	Magnaporthales	NA	NA	NA	Pyriculariaceae	Pyricularia	Pyricularia oryzae	Uganda	1.4	32.4
NCBI	MN202801	NA	AGGGATCATTACTGAGTTGAAAAACTCCAACCCCTGTGAACATAACCTCCTGTCGTTGCTTCGGCGGGCACGCCCGCCGGAGGTTCAAAACTCTTATTTTTTTCAGTATCTCTGAGCCTAAAAGACAAATAATCAAAACTTTCAACAACGGATCTCTTGGTTCTGGCATCGATGAAGAACGCAGCGAAATGCGATAAGTAATGTGAATTGCAGAATTCAGTGAATCATCGAATCTTTGAACGCACATTGCGCCCGCCGGTATTCCGGCGGGCATGCCTGTTCGAGCGTCATTTCAACCCTCAAGCCTCGGCTTGGTGTTGGGGCGCCCGGGCCCTCCGCGGCCCGGGGCCCCCAAGTTCATCGGCGGGCTCGTCGGTTCACTGAGCGCAGTAAAACGCG…	Eukaryota	Fungi	Ascomycota	Pezizomycotina	Sordariomycetes	Sordariomycetidae	NA	Magnaporthales	NA	NA	NA	Pyriculariaceae	Pyricularia	Pyricularia oryzae	Uganda	1.4	32.4
NCBI	MN202800	NA	AGGGATCATTACTGAGTTGAAAAACTCCAACCCCTGTGAACATAACCTCCTGTCGTTGCTTCGGCGGGCACGCCCGCCGGAGGTTCAAAACTCTTATTTTTTTCAGTATCTCTGAGCCTAAAAGACAAATAATCAAAACTTTCAACAACGGATCTCTTGGTTCTGGCATCGATGAAGAACGCAGCGAAATGCGATAAGTAATGTGAATTGCAGAATTCAGTGAATCATCGAATCTTTGAACGCACATTGCGCCCGCCGGTATTCCGGCGGGCATGCCTGTTCGAGCGTCATTTCAACCCTCAAGCCTCGGCTTGGTGTTGGGGCGCCCGGGCCCTCCGCGGCCCGGGGCCCCCAAGTTCATCGGCGGGCTCGTCGGTTCACTGAGCGCAGTAAAACGCG…	Eukaryota	Fungi	Ascomycota	Pezizomycotina	Sordariomycetes	Sordariomycetidae	NA	Magnaporthales	NA	NA	NA	Pyriculariaceae	Pyricularia	Pyricularia oryzae	Uganda	1.4	32.4
NCBI	MN202799	NA	AGGGATCATTACTGAGTTGAAAAACTCCAACCCCTGTGAACATAACCTCCTGTCGTTGCTTCGGCGGGCTCGCCCGCCGGAGGTTACAAACTCTTGTGTATTTTTTTAGCATCTCTGAGCCTAAAAGACAAATAATCAAAACTTTCAACAACGGATCTCTTGGTTCTGGCATCGATGAAGAACGCAGCGAAATGCGATAAGTAATGTGAATTGCAGAATTCAGTGAATCATCGAATCTTTGAACGCACATTGCGCCCGCCGGTATTCCGGCGGGCATGCCTGTTCGAGCGTCATTTCAACCCTCAAGCCCCGGCTTGGTGTTGGGGCGCCCGGGTCCCCCGCGGCCCGGGGCCCCCAAGTTCATCGGCGGGCTCGTCGGTACACTGAGCGCAGTAAAAC…	Eukaryota	Fungi	Ascomycota	Pezizomycotina	Sordariomycetes	Sordariomycetidae	NA	Magnaporthales	NA	NA	NA	Pyriculariaceae	Pyricularia	Pyricularia oryzae	Uganda	1.4	32.4
NCBI	MN202798	NA	AGGGATCATTACTGAGTTGAAAAACTCCAACCCCTGTGAACATAACCTCCTGTCGTTGCTTCGGCGGGCACGCCCGCCGGAGGTTCAAAACTCTTATTTTTTTCAGTATCTCTGAGCCTAAAAGACAAATAATCAAAACTTTCAACAACGGATCTCTTGGTTCTGGCATCGATGAAGAACGCAGCGAAATGCGATAAGTAATGTGAATTGCAGAATTCAGTGAATCATCGAATCTTTGAACGCACATTGCGCCCGCCGGTATTCCGGCGGGCATGCCTGTTCGAGCGTCATTTCAACCCTCAAGCCTCGGCTTGGTGTTGGGGCGCCCGGGCCCTCCGCGGCCCGGGGCCCCCAAGTTCATCGGCGGGCTCGTCGGTTCACTGAGCGCAGTAAAACGCG…	Eukaryota	Fungi	Ascomycota	Pezizomycotina	Sordariomycetes	Sordariomycetidae	NA	Magnaporthales	NA	NA	NA	Pyriculariaceae	Pyricularia	Pyricularia oryzae	Uganda	1.4	32.4
NCBI	MN202797	NA	AGGGATCATTACTGAGTTGAAAAACTCCAACCCCTGTGAACATAACCTCCTGTCGTTGCTTCGGCGGGCACGCCCGCCGGAGGTTCAAAACTCTTATTTTTTTCAGTATCTCTGAGCCTAAAAGACAAATAATCAAAACTTTCAACAACGGATCTCTTGGTTCTGGCATCGATGAAGAACGCAGCGAAATGCGATAAGTAATGTGAATTGCAGAATTCAGTGAATCATCGAATCTTTGAACGCACATTGCGCCCGCCGGTATTCCGGCGGGCATGCCTGTTCGAGCGTCATTTCAACCCTCAAGCCTCGGCTTGGTGTTGGGGCGCCCGGGCCCTCCGCGGCCCGGGGCCCCCAAGTTCATCGGCGGGCTCGTCGGTTCACTGAGCGCAGTAAAACGCG…	Eukaryota	Fungi	Ascomycota	Pezizomycotina	Sordariomycetes	Sordariomycetidae	NA	Magnaporthales	NA	NA	NA	Pyriculariaceae	Pyricularia	Pyricularia oryzae	Uganda	1.4	32.4
NCBI	MN202796	NA	AGGGATCATTACTGAGTTGAAAAACTCCAACCCCTGTGAACATAACCTCCTGTCGTTGCTTCGGCGGGCACGCCCGCCGGAGGTTCAAAACTCTTATTTTTTTCAGTATCTCTGAGCCTAAAAGACAAATAATCAAAACTTTCAACAACGGATCTCTTGGTTCTGGCATCGATGAAGAACGCAGCGAAATGCGATAAGTAATGTGAATTGCAGAATTCAGTGAATCATCGAATCTTTGAACGCACATTGCGCCCGCCGGTATTCCGGCGGGCATGCCTGTTCGAGCGTCATTTCAACCCTCAAGCCTCGGCTTGGTGTTGGGGCGCCCGGGCCCTCCGCGGCCCGGGGCCCCCAAGTTCATCGGCGGGCTCGTCGGTTCACTGAGCGCAGTAAAACGCG…	Eukaryota	Fungi	Ascomycota	Pezizomycotina	Sordariomycetes	Sordariomycetidae	NA	Magnaporthales	NA	NA	NA	Pyriculariaceae	Pyricularia	Pyricularia oryzae	Uganda	1.4	32.4

## Sheet: Table S2
Table S2. Infection response of the P. orizae isolates (One-Way ANOVA), and considering the agar plug inoculation with or without punction damage on detached S. secundatum leaves (Two-Way ANOVA).
One-way ANOVA Plug inoculation without damage on detached leaves
Source	DF	SS	MS	F	P
Isolate	5	2.056	0.411	293.77	0
Error	24	0.033	0.001
Total	29
One-way ANOVA Plug inoculation with damage on detached leaves
Isolate	5	20290.3	4058.1	54.81	0
Error	24	1777.1	74
Total	29	22067.4
Two-way ANOVA
Isolate	5	31719.2	6343.8	144.11	0
Treatment	1	11380.7	11380.7	258.53	0
Isolate*Treatment	5	9132.3	1826.5	41.49	0
Error	48	2113	44
Total	59	54345.1
